# Supplementary material
Source: publisher figshare collection journal article supplement (https://springernature.figshare.com/ndownloader/files/17773211)
Supplement: Supplementary file 1 [file 17773211]

track name=RI visibility=2
1	hq_isoforms.fasta.no5merge.collapsed.gff	exon	329175	329249	.	-	.	gene_id "RI:1:329175:329249-330110:330212:-"; transcript_id "RI:1:329175:329249-330110:330212:-:alternative2";
1	hq_isoforms.fasta.no5merge.collapsed.gff	exon	330110	330212	.	-	.	gene_id "RI:1:329175:329249-330110:330212:-"; transcript_id "RI:1:329175:329249-330110:330212:-:alternative2";
1	hq_isoforms.fasta.no5merge.collapsed.gff	exon	329175	330212	.	-	.	gene_id "RI:1:329175:329249-330110:330212:-"; transcript_id "RI:1:329175:329249-330110:330212:-:alternative1";
1	hq_isoforms.fasta.no5merge.collapsed.gff	exon	335889	335983	.	-	.	gene_id "RI:1:335889:335983-336086:336181:-"; transcript_id "RI:1:335889:335983-336086:336181:-:alternative2";
1	hq_isoforms.fasta.no5merge.collapsed.gff	exon	336086	336181	.	-	.	gene_id "RI:1:335889:335983-336086:336181:-"; transcript_id "RI:1:335889:335983-336086:336181:-:alternative2";
1	hq_isoforms.fasta.no5merge.collapsed.gff	exon	335889	336181	.	-	.	gene_id "RI:1:335889:335983-336086:336181:-"; transcript_id "RI:1:335889:335983-336086:336181:-:alternative1";
1	hq_isoforms.fasta.no5merge.collapsed.gff	exon	337343	337398	.	-	.	gene_id "RI:1:337343:337398-338000:338062:-"; transcript_id "RI:1:337343:337398-338000:338062:-:alternative2";
1	hq_isoforms.fasta.no5merge.collapsed.gff	exon	338000	338062	.	-	.	gene_id "RI:1:337343:337398-338000:338062:-"; transcript_id "RI:1:337343:337398-338000:338062:-:alternative2";
1	hq_isoforms.fasta.no5merge.collapsed.gff	exon	337343	338062	.	-	.	gene_id "RI:1:337343:337398-338000:338062:-"; transcript_id "RI:1:337343:337398-338000:338062:-:alternative1";
1	hq_isoforms.fasta.no5merge.collapsed.gff	exon	1161599	1161665	.	-	.	gene_id "RI:1:1161599:1161665-1162539:1162623:-"; transcript_id "RI:1:1161599:1161665-1162539:1162623:-:alternative2";
1	hq_isoforms.fasta.no5merge.collapsed.gff	exon	1162539	1162623	.	-	.	gene_id "RI:1:1161599:1161665-1162539:1162623:-"; transcript_id "RI:1:1161599:1161665-1162539:1162623:-:alternative2";
1	hq_isoforms.fasta.no5merge.collapsed.gff	exon	1161599	1162623	.	-	.	gene_id "RI:1:1161599:1161665-1162539:1162623:-"; transcript_id "RI:1:1161599:1161665-1162539:1162623:-:alternative1";
1	hq_isoforms.fasta.no5merge.collapsed.gff	exon	1159590	1159729	.	-	.	gene_id "RI:1:1159590:1159729-1161034:1161081:-"; transcript_id "RI:1:1159590:1159729-1161034:1161081:-:alternative2";
1	hq_isoforms.fasta.no5merge.collapsed.gff	exon	1161034	1161081	.	-	.	gene_id "RI:1:1159590:1159729-1161034:1161081:-"; transcript_id "RI:1:1159590:1159729-1161034:1161081:-:alternative2";
1	hq_isoforms.fasta.no5merge.collapsed.gff	exon	1159590	1161081	.	-	.	gene_id "RI:1:1159590:1159729-1161034:1161081:-"; transcript_id "RI:1:1159590:1159729-1161034:1161081:-:alternative1";
1	hq_isoforms.fasta.no5merge.collapsed.gff	exon	2735754	2735946	.	-	.	gene_id "RI:1:2735754:2735946-2739784:2739893:-"; transcript_id "RI:1:2735754:2735946-2739784:2739893:-:alternative2";
1	hq_isoforms.fasta.no5merge.collapsed.gff	exon	2739784	2739893	.	-	.	gene_id "RI:1:2735754:2735946-2739784:2739893:-"; transcript_id "RI:1:2735754:2735946-2739784:2739893:-:alternative2";
1	hq_isoforms.fasta.no5merge.collapsed.gff	exon	2735754	2739893	.	-	.	gene_id "RI:1:2735754:2735946-2739784:2739893:-"; transcript_id "RI:1:2735754:2735946-2739784:2739893:-:alternative1";
1	hq_isoforms.fasta.no5merge.collapsed.gff	exon	5513018	5513138	.	-	.	gene_id "RI:1:5513018:5513138-5514979:5515027:-"; transcript_id "RI:1:5513018:5513138-5514979:5515027:-:alternative2";
1	hq_isoforms.fasta.no5merge.collapsed.gff	exon	5514979	5515027	.	-	.	gene_id "RI:1:5513018:5513138-5514979:5515027:-"; transcript_id "RI:1:5513018:5513138-5514979:5515027:-:alternative2";
1	hq_isoforms.fasta.no5merge.collapsed.gff	exon	5513018	5515027	.	-	.	gene_id "RI:1:5513018:5513138-5514979:5515027:-"; transcript_id "RI:1:5513018:5513138-5514979:5515027:-:alternative1";
1	hq_isoforms.fasta.no5merge.collapsed.gff	exon	5659443	5659640	.	-	.	gene_id "RI:1:5659443:5659640-5659723:5659836:-"; transcript_id "RI:1:5659443:5659640-5659723:5659836:-:alternative2";
1	hq_isoforms.fasta.no5merge.collapsed.gff	exon	5659723	5659836	.	-	.	gene_id "RI:1:5659443:5659640-5659723:5659836:-"; transcript_id "RI:1:5659443:5659640-5659723:5659836:-:alternative2";
1	hq_isoforms.fasta.no5merge.collapsed.gff	exon	5659443	5659836	.	-	.	gene_id "RI:1:5659443:5659640-5659723:5659836:-"; transcript_id "RI:1:5659443:5659640-5659723:5659836:-:alternative1";
1	hq_isoforms.fasta.no5merge.collapsed.gff	exon	5657149	5657270	.	-	.	gene_id "RI:1:5657149:5657270-5658424:5658611:-"; transcript_id "RI:1:5657149:5657270-5658424:5658611:-:alternative2";
1	hq_isoforms.fasta.no5merge.collapsed.gff	exon	5658424	5658611	.	-	.	gene_id "RI:1:5657149:5657270-5658424:5658611:-"; transcript_id "RI:1:5657149:5657270-5658424:5658611:-:alternative2";
1	hq_isoforms.fasta.no5merge.collapsed.gff	exon	5657149	5658611	.	-	.	gene_id "RI:1:5657149:5657270-5658424:5658611:-"; transcript_id "RI:1:5657149:5657270-5658424:5658611:-:alternative1";
1	hq_isoforms.fasta.no5merge.collapsed.gff	exon	6182890	6183057	.	-	.	gene_id "RI:1:6182890:6183057-6183184:6186437:-"; transcript_id "RI:1:6182890:6183057-6183184:6186437:-:alternative2";
1	hq_isoforms.fasta.no5merge.collapsed.gff	exon	6183184	6186437	.	-	.	gene_id "RI:1:6182890:6183057-6183184:6186437:-"; transcript_id "RI:1:6182890:6183057-6183184:6186437:-:alternative2";
1	hq_isoforms.fasta.no5merge.collapsed.gff	exon	6182890	6186437	.	-	.	gene_id "RI:1:6182890:6183057-6183184:6186437:-"; transcript_id "RI:1:6182890:6183057-6183184:6186437:-:alternative1";
1	hq_isoforms.fasta.no5merge.collapsed.gff	exon	6230070	6231274	.	-	.	gene_id "RI:1:6230070:6231274-6231368:6231533:-"; transcript_id "RI:1:6230070:6231274-6231368:6231533:-:alternative2";
1	hq_isoforms.fasta.no5merge.collapsed.gff	exon	6231368	6231533	.	-	.	gene_id "RI:1:6230070:6231274-6231368:6231533:-"; transcript_id "RI:1:6230070:6231274-6231368:6231533:-:alternative2";
1	hq_isoforms.fasta.no5merge.collapsed.gff	exon	6230070	6231533	.	-	.	gene_id "RI:1:6230070:6231274-6231368:6231533:-"; transcript_id "RI:1:6230070:6231274-6231368:6231533:-:alternative1";
1	hq_isoforms.fasta.no5merge.collapsed.gff	exon	6231976	6232086	.	-	.	gene_id "RI:1:6231976:6232086-6232475:6232530:-"; transcript_id "RI:1:6231976:6232086-6232475:6232530:-:alternative2";
1	hq_isoforms.fasta.no5merge.collapsed.gff	exon	6232475	6232530	.	-	.	gene_id "RI:1:6231976:6232086-6232475:6232530:-"; transcript_id "RI:1:6231976:6232086-6232475:6232530:-:alternative2";
1	hq_isoforms.fasta.no5merge.collapsed.gff	exon	6231976	6232530	.	-	.	gene_id "RI:1:6231976:6232086-6232475:6232530:-"; transcript_id "RI:1:6231976:6232086-6232475:6232530:-:alternative1";
1	hq_isoforms.fasta.no5merge.collapsed.gff	exon	6919811	6919912	.	-	.	gene_id "RI:1:6919811:6919912-6920357:6920429:-"; transcript_id "RI:1:6919811:6919912-6920357:6920429:-:alternative2";
1	hq_isoforms.fasta.no5merge.collapsed.gff	exon	6920357	6920429	.	-	.	gene_id "RI:1:6919811:6919912-6920357:6920429:-"; transcript_id "RI:1:6919811:6919912-6920357:6920429:-:alternative2";
1	hq_isoforms.fasta.no5merge.collapsed.gff	exon	6919811	6920429	.	-	.	gene_id "RI:1:6919811:6919912-6920357:6920429:-"; transcript_id "RI:1:6919811:6919912-6920357:6920429:-:alternative1";
1	hq_isoforms.fasta.no5merge.collapsed.gff	exon	6953440	6953881	.	-	.	gene_id "RI:1:6953440:6953881-6953998:6954787:-"; transcript_id "RI:1:6953440:6953881-6953998:6954787:-:alternative2";
1	hq_isoforms.fasta.no5merge.collapsed.gff	exon	6953998	6954787	.	-	.	gene_id "RI:1:6953440:6953881-6953998:6954787:-"; transcript_id "RI:1:6953440:6953881-6953998:6954787:-:alternative2";
1	hq_isoforms.fasta.no5merge.collapsed.gff	exon	6953440	6954787	.	-	.	gene_id "RI:1:6953440:6953881-6953998:6954787:-"; transcript_id "RI:1:6953440:6953881-6953998:6954787:-:alternative1";
1	hq_isoforms.fasta.no5merge.collapsed.gff	exon	6968427	6968459	.	-	.	gene_id "RI:1:6968427:6968459-6969235:6969392:-"; transcript_id "RI:1:6968427:6968459-6969235:6969392:-:alternative2";
1	hq_isoforms.fasta.no5merge.collapsed.gff	exon	6969235	6969392	.	-	.	gene_id "RI:1:6968427:6968459-6969235:6969392:-"; transcript_id "RI:1:6968427:6968459-6969235:6969392:-:alternative2";
1	hq_isoforms.fasta.no5merge.collapsed.gff	exon	6968427	6969392	.	-	.	gene_id "RI:1:6968427:6968459-6969235:6969392:-"; transcript_id "RI:1:6968427:6968459-6969235:6969392:-:alternative1";
1	hq_isoforms.fasta.no5merge.collapsed.gff	exon	10503519	10504831	.	-	.	gene_id "RI:1:10503519:10504831-10504896:10506057:-"; transcript_id "RI:1:10503519:10504831-10504896:10506057:-:alternative2";
1	hq_isoforms.fasta.no5merge.collapsed.gff	exon	10504896	10506057	.	-	.	gene_id "RI:1:10503519:10504831-10504896:10506057:-"; transcript_id "RI:1:10503519:10504831-10504896:10506057:-:alternative2";
1	hq_isoforms.fasta.no5merge.collapsed.gff	exon	10503519	10506057	.	-	.	gene_id "RI:1:10503519:10504831-10504896:10506057:-"; transcript_id "RI:1:10503519:10504831-10504896:10506057:-:alternative1";
1	hq_isoforms.fasta.no5merge.collapsed.gff	exon	10503520	10506057	.	-	.	gene_id "RI:1:10503520:10506057-10506740:10506904:-"; transcript_id "RI:1:10503520:10506057-10506740:10506904:-:alternative2";
1	hq_isoforms.fasta.no5merge.collapsed.gff	exon	10506740	10506904	.	-	.	gene_id "RI:1:10503520:10506057-10506740:10506904:-"; transcript_id "RI:1:10503520:10506057-10506740:10506904:-:alternative2";
1	hq_isoforms.fasta.no5merge.collapsed.gff	exon	10503520	10506904	.	-	.	gene_id "RI:1:10503520:10506057-10506740:10506904:-"; transcript_id "RI:1:10503520:10506057-10506740:10506904:-:alternative1";
1	hq_isoforms.fasta.no5merge.collapsed.gff	exon	10504202	10505124	.	-	.	gene_id "RI:1:10504202:10505124-10505154:10506057:-"; transcript_id "RI:1:10504202:10505124-10505154:10506057:-:alternative2";
1	hq_isoforms.fasta.no5merge.collapsed.gff	exon	10505154	10506057	.	-	.	gene_id "RI:1:10504202:10505124-10505154:10506057:-"; transcript_id "RI:1:10504202:10505124-10505154:10506057:-:alternative2";
1	hq_isoforms.fasta.no5merge.collapsed.gff	exon	10504202	10506057	.	-	.	gene_id "RI:1:10504202:10505124-10505154:10506057:-"; transcript_id "RI:1:10504202:10505124-10505154:10506057:-:alternative1";
1	hq_isoforms.fasta.no5merge.collapsed.gff	exon	10504203	10506057	.	-	.	gene_id "RI:1:10504203:10506057-10506740:10506904:-"; transcript_id "RI:1:10504203:10506057-10506740:10506904:-:alternative2";
1	hq_isoforms.fasta.no5merge.collapsed.gff	exon	10506740	10506904	.	-	.	gene_id "RI:1:10504203:10506057-10506740:10506904:-"; transcript_id "RI:1:10504203:10506057-10506740:10506904:-:alternative2";
1	hq_isoforms.fasta.no5merge.collapsed.gff	exon	10504203	10506904	.	-	.	gene_id "RI:1:10504203:10506057-10506740:10506904:-"; transcript_id "RI:1:10504203:10506057-10506740:10506904:-:alternative1";
1	hq_isoforms.fasta.no5merge.collapsed.gff	exon	10504204	10506057	.	-	.	gene_id "RI:1:10504204:10506057-10506740:10506904:-"; transcript_id "RI:1:10504204:10506057-10506740:10506904:-:alternative2";
1	hq_isoforms.fasta.no5merge.collapsed.gff	exon	10506740	10506904	.	-	.	gene_id "RI:1:10504204:10506057-10506740:10506904:-"; transcript_id "RI:1:10504204:10506057-10506740:10506904:-:alternative2";
1	hq_isoforms.fasta.no5merge.collapsed.gff	exon	10504204	10506904	.	-	.	gene_id "RI:1:10504204:10506057-10506740:10506904:-"; transcript_id "RI:1:10504204:10506057-10506740:10506904:-:alternative1";
1	hq_isoforms.fasta.no5merge.collapsed.gff	exon	10504205	10506057	.	-	.	gene_id "RI:1:10504205:10506057-10506740:10506904:-"; transcript_id "RI:1:10504205:10506057-10506740:10506904:-:alternative2";
1	hq_isoforms.fasta.no5merge.collapsed.gff	exon	10506740	10506904	.	-	.	gene_id "RI:1:10504205:10506057-10506740:10506904:-"; transcript_id "RI:1:10504205:10506057-10506740:10506904:-:alternative2";
1	hq_isoforms.fasta.no5merge.collapsed.gff	exon	10504205	10506904	.	-	.	gene_id "RI:1:10504205:10506057-10506740:10506904:-"; transcript_id "RI:1:10504205:10506057-10506740:10506904:-:alternative1";
1	hq_isoforms.fasta.no5merge.collapsed.gff	exon	10514061	10514107	.	-	.	gene_id "RI:1:10514061:10514107-10514796:10514975:-"; transcript_id "RI:1:10514061:10514107-10514796:10514975:-:alternative2";
1	hq_isoforms.fasta.no5merge.collapsed.gff	exon	10514796	10514975	.	-	.	gene_id "RI:1:10514061:10514107-10514796:10514975:-"; transcript_id "RI:1:10514061:10514107-10514796:10514975:-:alternative2";
1	hq_isoforms.fasta.no5merge.collapsed.gff	exon	10514061	10514975	.	-	.	gene_id "RI:1:10514061:10514107-10514796:10514975:-"; transcript_id "RI:1:10514061:10514107-10514796:10514975:-:alternative1";
1	hq_isoforms.fasta.no5merge.collapsed.gff	exon	10517136	10517280	.	-	.	gene_id "RI:1:10517136:10517280-10519500:10519660:-"; transcript_id "RI:1:10517136:10517280-10519500:10519660:-:alternative2";
1	hq_isoforms.fasta.no5merge.collapsed.gff	exon	10519500	10519660	.	-	.	gene_id "RI:1:10517136:10517280-10519500:10519660:-"; transcript_id "RI:1:10517136:10517280-10519500:10519660:-:alternative2";
1	hq_isoforms.fasta.no5merge.collapsed.gff	exon	10517136	10519660	.	-	.	gene_id "RI:1:10517136:10517280-10519500:10519660:-"; transcript_id "RI:1:10517136:10517280-10519500:10519660:-:alternative1";
1	hq_isoforms.fasta.no5merge.collapsed.gff	exon	10517136	10517244	.	-	.	gene_id "RI:1:10517136:10517244-10519576:10519660:-"; transcript_id "RI:1:10517136:10517244-10519576:10519660:-:alternative2";
1	hq_isoforms.fasta.no5merge.collapsed.gff	exon	10519576	10519660	.	-	.	gene_id "RI:1:10517136:10517244-10519576:10519660:-"; transcript_id "RI:1:10517136:10517244-10519576:10519660:-:alternative2";
1	hq_isoforms.fasta.no5merge.collapsed.gff	exon	10517136	10519660	.	-	.	gene_id "RI:1:10517136:10517244-10519576:10519660:-"; transcript_id "RI:1:10517136:10517244-10519576:10519660:-:alternative1";
1	hq_isoforms.fasta.no5merge.collapsed.gff	exon	10512563	10514653	.	-	.	gene_id "RI:1:10512563:10514653-10514796:10514975:-"; transcript_id "RI:1:10512563:10514653-10514796:10514975:-:alternative2";
1	hq_isoforms.fasta.no5merge.collapsed.gff	exon	10514796	10514975	.	-	.	gene_id "RI:1:10512563:10514653-10514796:10514975:-"; transcript_id "RI:1:10512563:10514653-10514796:10514975:-:alternative2";
1	hq_isoforms.fasta.no5merge.collapsed.gff	exon	10512563	10514975	.	-	.	gene_id "RI:1:10512563:10514653-10514796:10514975:-"; transcript_id "RI:1:10512563:10514653-10514796:10514975:-:alternative1";
1	hq_isoforms.fasta.no5merge.collapsed.gff	exon	11828816	11828947	.	-	.	gene_id "RI:1:11828816:11828947-11829988:11830260:-"; transcript_id "RI:1:11828816:11828947-11829988:11830260:-:alternative2";
1	hq_isoforms.fasta.no5merge.collapsed.gff	exon	11829988	11830260	.	-	.	gene_id "RI:1:11828816:11828947-11829988:11830260:-"; transcript_id "RI:1:11828816:11828947-11829988:11830260:-:alternative2";
1	hq_isoforms.fasta.no5merge.collapsed.gff	exon	11828816	11830260	.	-	.	gene_id "RI:1:11828816:11828947-11829988:11830260:-"; transcript_id "RI:1:11828816:11828947-11829988:11830260:-:alternative1";
1	hq_isoforms.fasta.no5merge.collapsed.gff	exon	11836827	11836985	.	-	.	gene_id "RI:1:11836827:11836985-11838640:11841400:-"; transcript_id "RI:1:11836827:11836985-11838640:11841400:-:alternative2";
1	hq_isoforms.fasta.no5merge.collapsed.gff	exon	11838640	11841400	.	-	.	gene_id "RI:1:11836827:11836985-11838640:11841400:-"; transcript_id "RI:1:11836827:11836985-11838640:11841400:-:alternative2";
1	hq_isoforms.fasta.no5merge.collapsed.gff	exon	11836827	11841400	.	-	.	gene_id "RI:1:11836827:11836985-11838640:11841400:-"; transcript_id "RI:1:11836827:11836985-11838640:11841400:-:alternative1";
1	hq_isoforms.fasta.no5merge.collapsed.gff	exon	11850203	11850272	.	-	.	gene_id "RI:1:11850203:11850272-11854043:11854099:-"; transcript_id "RI:1:11850203:11850272-11854043:11854099:-:alternative2";
1	hq_isoforms.fasta.no5merge.collapsed.gff	exon	11854043	11854099	.	-	.	gene_id "RI:1:11850203:11850272-11854043:11854099:-"; transcript_id "RI:1:11850203:11850272-11854043:11854099:-:alternative2";
1	hq_isoforms.fasta.no5merge.collapsed.gff	exon	11850203	11854099	.	-	.	gene_id "RI:1:11850203:11850272-11854043:11854099:-"; transcript_id "RI:1:11850203:11850272-11854043:11854099:-:alternative1";
1	hq_isoforms.fasta.no5merge.collapsed.gff	exon	12074445	12075065	.	-	.	gene_id "RI:1:12074445:12075065-12076969:12077042:-"; transcript_id "RI:1:12074445:12075065-12076969:12077042:-:alternative2";
1	hq_isoforms.fasta.no5merge.collapsed.gff	exon	12076969	12077042	.	-	.	gene_id "RI:1:12074445:12075065-12076969:12077042:-"; transcript_id "RI:1:12074445:12075065-12076969:12077042:-:alternative2";
1	hq_isoforms.fasta.no5merge.collapsed.gff	exon	12074445	12077042	.	-	.	gene_id "RI:1:12074445:12075065-12076969:12077042:-"; transcript_id "RI:1:12074445:12075065-12076969:12077042:-:alternative1";
1	hq_isoforms.fasta.no5merge.collapsed.gff	exon	12419736	12419858	.	-	.	gene_id "RI:1:12419736:12419858-12420557:12420649:-"; transcript_id "RI:1:12419736:12419858-12420557:12420649:-:alternative2";
1	hq_isoforms.fasta.no5merge.collapsed.gff	exon	12420557	12420649	.	-	.	gene_id "RI:1:12419736:12419858-12420557:12420649:-"; transcript_id "RI:1:12419736:12419858-12420557:12420649:-:alternative2";
1	hq_isoforms.fasta.no5merge.collapsed.gff	exon	12419736	12420649	.	-	.	gene_id "RI:1:12419736:12419858-12420557:12420649:-"; transcript_id "RI:1:12419736:12419858-12420557:12420649:-:alternative1";
1	hq_isoforms.fasta.no5merge.collapsed.gff	exon	12424755	12424850	.	-	.	gene_id "RI:1:12424755:12424850-12425740:12425817:-"; transcript_id "RI:1:12424755:12424850-12425740:12425817:-:alternative2";
1	hq_isoforms.fasta.no5merge.collapsed.gff	exon	12425740	12425817	.	-	.	gene_id "RI:1:12424755:12424850-12425740:12425817:-"; transcript_id "RI:1:12424755:12424850-12425740:12425817:-:alternative2";
1	hq_isoforms.fasta.no5merge.collapsed.gff	exon	12424755	12425817	.	-	.	gene_id "RI:1:12424755:12424850-12425740:12425817:-"; transcript_id "RI:1:12424755:12424850-12425740:12425817:-:alternative1";
1	hq_isoforms.fasta.no5merge.collapsed.gff	exon	12816124	12816236	.	-	.	gene_id "RI:1:12816124:12816236-12818385:12818437:-"; transcript_id "RI:1:12816124:12816236-12818385:12818437:-:alternative2";
1	hq_isoforms.fasta.no5merge.collapsed.gff	exon	12818385	12818437	.	-	.	gene_id "RI:1:12816124:12816236-12818385:12818437:-"; transcript_id "RI:1:12816124:12816236-12818385:12818437:-:alternative2";
1	hq_isoforms.fasta.no5merge.collapsed.gff	exon	12816124	12818437	.	-	.	gene_id "RI:1:12816124:12816236-12818385:12818437:-"; transcript_id "RI:1:12816124:12816236-12818385:12818437:-:alternative1";
1	hq_isoforms.fasta.no5merge.collapsed.gff	exon	12770362	12770453	.	-	.	gene_id "RI:1:12770362:12770453-12770816:12770904:-"; transcript_id "RI:1:12770362:12770453-12770816:12770904:-:alternative2";
1	hq_isoforms.fasta.no5merge.collapsed.gff	exon	12770816	12770904	.	-	.	gene_id "RI:1:12770362:12770453-12770816:12770904:-"; transcript_id "RI:1:12770362:12770453-12770816:12770904:-:alternative2";
1	hq_isoforms.fasta.no5merge.collapsed.gff	exon	12770362	12770904	.	-	.	gene_id "RI:1:12770362:12770453-12770816:12770904:-"; transcript_id "RI:1:12770362:12770453-12770816:12770904:-:alternative1";
1	hq_isoforms.fasta.no5merge.collapsed.gff	exon	12837347	12837530	.	-	.	gene_id "RI:1:12837347:12837530-12839046:12839172:-"; transcript_id "RI:1:12837347:12837530-12839046:12839172:-:alternative2";
1	hq_isoforms.fasta.no5merge.collapsed.gff	exon	12839046	12839172	.	-	.	gene_id "RI:1:12837347:12837530-12839046:12839172:-"; transcript_id "RI:1:12837347:12837530-12839046:12839172:-:alternative2";
1	hq_isoforms.fasta.no5merge.collapsed.gff	exon	12837347	12839172	.	-	.	gene_id "RI:1:12837347:12837530-12839046:12839172:-"; transcript_id "RI:1:12837347:12837530-12839046:12839172:-:alternative1";
1	hq_isoforms.fasta.no5merge.collapsed.gff	exon	13234559	13234593	.	-	.	gene_id "RI:1:13234559:13234593-13236326:13236538:-"; transcript_id "RI:1:13234559:13234593-13236326:13236538:-:alternative2";
1	hq_isoforms.fasta.no5merge.collapsed.gff	exon	13236326	13236538	.	-	.	gene_id "RI:1:13234559:13234593-13236326:13236538:-"; transcript_id "RI:1:13234559:13234593-13236326:13236538:-:alternative2";
1	hq_isoforms.fasta.no5merge.collapsed.gff	exon	13234559	13236538	.	-	.	gene_id "RI:1:13234559:13234593-13236326:13236538:-"; transcript_id "RI:1:13234559:13234593-13236326:13236538:-:alternative1";
1	hq_isoforms.fasta.no5merge.collapsed.gff	exon	13474859	13478736	.	-	.	gene_id "RI:1:13474859:13478736-13482756:13483710:-"; transcript_id "RI:1:13474859:13478736-13482756:13483710:-:alternative2";
1	hq_isoforms.fasta.no5merge.collapsed.gff	exon	13482756	13483710	.	-	.	gene_id "RI:1:13474859:13478736-13482756:13483710:-"; transcript_id "RI:1:13474859:13478736-13482756:13483710:-:alternative2";
1	hq_isoforms.fasta.no5merge.collapsed.gff	exon	13474859	13483710	.	-	.	gene_id "RI:1:13474859:13478736-13482756:13483710:-"; transcript_id "RI:1:13474859:13478736-13482756:13483710:-:alternative1";
1	hq_isoforms.fasta.no5merge.collapsed.gff	exon	13486940	13487061	.	-	.	gene_id "RI:1:13486940:13487061-13488253:13488445:-"; transcript_id "RI:1:13486940:13487061-13488253:13488445:-:alternative2";
1	hq_isoforms.fasta.no5merge.collapsed.gff	exon	13488253	13488445	.	-	.	gene_id "RI:1:13486940:13487061-13488253:13488445:-"; transcript_id "RI:1:13486940:13487061-13488253:13488445:-:alternative2";
1	hq_isoforms.fasta.no5merge.collapsed.gff	exon	13486940	13488445	.	-	.	gene_id "RI:1:13486940:13487061-13488253:13488445:-"; transcript_id "RI:1:13486940:13487061-13488253:13488445:-:alternative1";
1	hq_isoforms.fasta.no5merge.collapsed.gff	exon	13486323	13487061	.	-	.	gene_id "RI:1:13486323:13487061-13488253:13488445:-"; transcript_id "RI:1:13486323:13487061-13488253:13488445:-:alternative2";
1	hq_isoforms.fasta.no5merge.collapsed.gff	exon	13488253	13488445	.	-	.	gene_id "RI:1:13486323:13487061-13488253:13488445:-"; transcript_id "RI:1:13486323:13487061-13488253:13488445:-:alternative2";
1	hq_isoforms.fasta.no5merge.collapsed.gff	exon	13486323	13488445	.	-	.	gene_id "RI:1:13486323:13487061-13488253:13488445:-"; transcript_id "RI:1:13486323:13487061-13488253:13488445:-:alternative1";
1	hq_isoforms.fasta.no5merge.collapsed.gff	exon	14045390	14045533	.	-	.	gene_id "RI:1:14045390:14045533-14047210:14048320:-"; transcript_id "RI:1:14045390:14045533-14047210:14048320:-:alternative2";
1	hq_isoforms.fasta.no5merge.collapsed.gff	exon	14047210	14048320	.	-	.	gene_id "RI:1:14045390:14045533-14047210:14048320:-"; transcript_id "RI:1:14045390:14045533-14047210:14048320:-:alternative2";
1	hq_isoforms.fasta.no5merge.collapsed.gff	exon	14045390	14048320	.	-	.	gene_id "RI:1:14045390:14045533-14047210:14048320:-"; transcript_id "RI:1:14045390:14045533-14047210:14048320:-:alternative1";
1	hq_isoforms.fasta.no5merge.collapsed.gff	exon	14039191	14042203	.	-	.	gene_id "RI:1:14039191:14042203-14045390:14048320:-"; transcript_id "RI:1:14039191:14042203-14045390:14048320:-:alternative2";
1	hq_isoforms.fasta.no5merge.collapsed.gff	exon	14045390	14048320	.	-	.	gene_id "RI:1:14039191:14042203-14045390:14048320:-"; transcript_id "RI:1:14039191:14042203-14045390:14048320:-:alternative2";
1	hq_isoforms.fasta.no5merge.collapsed.gff	exon	14039191	14048320	.	-	.	gene_id "RI:1:14039191:14042203-14045390:14048320:-"; transcript_id "RI:1:14039191:14042203-14045390:14048320:-:alternative1";
1	hq_isoforms.fasta.no5merge.collapsed.gff	exon	14057947	14058026	.	-	.	gene_id "RI:1:14057947:14058026-14058571:14058697:-"; transcript_id "RI:1:14057947:14058026-14058571:14058697:-:alternative2";
1	hq_isoforms.fasta.no5merge.collapsed.gff	exon	14058571	14058697	.	-	.	gene_id "RI:1:14057947:14058026-14058571:14058697:-"; transcript_id "RI:1:14057947:14058026-14058571:14058697:-:alternative2";
1	hq_isoforms.fasta.no5merge.collapsed.gff	exon	14057947	14058697	.	-	.	gene_id "RI:1:14057947:14058026-14058571:14058697:-"; transcript_id "RI:1:14057947:14058026-14058571:14058697:-:alternative1";
1	hq_isoforms.fasta.no5merge.collapsed.gff	exon	15737627	15737732	.	-	.	gene_id "RI:1:15737627:15737732-15738447:15738599:-"; transcript_id "RI:1:15737627:15737732-15738447:15738599:-:alternative2";
1	hq_isoforms.fasta.no5merge.collapsed.gff	exon	15738447	15738599	.	-	.	gene_id "RI:1:15737627:15737732-15738447:15738599:-"; transcript_id "RI:1:15737627:15737732-15738447:15738599:-:alternative2";
1	hq_isoforms.fasta.no5merge.collapsed.gff	exon	15737627	15738599	.	-	.	gene_id "RI:1:15737627:15737732-15738447:15738599:-"; transcript_id "RI:1:15737627:15737732-15738447:15738599:-:alternative1";
1	hq_isoforms.fasta.no5merge.collapsed.gff	exon	18789348	18789537	.	-	.	gene_id "RI:1:18789348:18789537-18792985:18793101:-"; transcript_id "RI:1:18789348:18789537-18792985:18793101:-:alternative2";
1	hq_isoforms.fasta.no5merge.collapsed.gff	exon	18792985	18793101	.	-	.	gene_id "RI:1:18789348:18789537-18792985:18793101:-"; transcript_id "RI:1:18789348:18789537-18792985:18793101:-:alternative2";
1	hq_isoforms.fasta.no5merge.collapsed.gff	exon	18789348	18793101	.	-	.	gene_id "RI:1:18789348:18789537-18792985:18793101:-"; transcript_id "RI:1:18789348:18789537-18792985:18793101:-:alternative1";
1	hq_isoforms.fasta.no5merge.collapsed.gff	exon	19111257	19111401	.	-	.	gene_id "RI:1:19111257:19111401-19111478:19111634:-"; transcript_id "RI:1:19111257:19111401-19111478:19111634:-:alternative2";
1	hq_isoforms.fasta.no5merge.collapsed.gff	exon	19111478	19111634	.	-	.	gene_id "RI:1:19111257:19111401-19111478:19111634:-"; transcript_id "RI:1:19111257:19111401-19111478:19111634:-:alternative2";
1	hq_isoforms.fasta.no5merge.collapsed.gff	exon	19111257	19111634	.	-	.	gene_id "RI:1:19111257:19111401-19111478:19111634:-"; transcript_id "RI:1:19111257:19111401-19111478:19111634:-:alternative1";
1	hq_isoforms.fasta.no5merge.collapsed.gff	exon	19108552	19108728	.	-	.	gene_id "RI:1:19108552:19108728-19109990:19110353:-"; transcript_id "RI:1:19108552:19108728-19109990:19110353:-:alternative2";
1	hq_isoforms.fasta.no5merge.collapsed.gff	exon	19109990	19110353	.	-	.	gene_id "RI:1:19108552:19108728-19109990:19110353:-"; transcript_id "RI:1:19108552:19108728-19109990:19110353:-:alternative2";
1	hq_isoforms.fasta.no5merge.collapsed.gff	exon	19108552	19110353	.	-	.	gene_id "RI:1:19108552:19108728-19109990:19110353:-"; transcript_id "RI:1:19108552:19108728-19109990:19110353:-:alternative1";
1	hq_isoforms.fasta.no5merge.collapsed.gff	exon	19110815	19110924	.	-	.	gene_id "RI:1:19110815:19110924-19111257:19111634:-"; transcript_id "RI:1:19110815:19110924-19111257:19111634:-:alternative2";
1	hq_isoforms.fasta.no5merge.collapsed.gff	exon	19111257	19111634	.	-	.	gene_id "RI:1:19110815:19110924-19111257:19111634:-"; transcript_id "RI:1:19110815:19110924-19111257:19111634:-:alternative2";
1	hq_isoforms.fasta.no5merge.collapsed.gff	exon	19110815	19111634	.	-	.	gene_id "RI:1:19110815:19110924-19111257:19111634:-"; transcript_id "RI:1:19110815:19110924-19111257:19111634:-:alternative1";
1	hq_isoforms.fasta.no5merge.collapsed.gff	exon	19110661	19110711	.	-	.	gene_id "RI:1:19110661:19110711-19110815:19111634:-"; transcript_id "RI:1:19110661:19110711-19110815:19111634:-:alternative2";
1	hq_isoforms.fasta.no5merge.collapsed.gff	exon	19110815	19111634	.	-	.	gene_id "RI:1:19110661:19110711-19110815:19111634:-"; transcript_id "RI:1:19110661:19110711-19110815:19111634:-:alternative2";
1	hq_isoforms.fasta.no5merge.collapsed.gff	exon	19110661	19111634	.	-	.	gene_id "RI:1:19110661:19110711-19110815:19111634:-"; transcript_id "RI:1:19110661:19110711-19110815:19111634:-:alternative1";
1	hq_isoforms.fasta.no5merge.collapsed.gff	exon	20177798	20177851	.	-	.	gene_id "RI:1:20177798:20177851-20179705:20179789:-"; transcript_id "RI:1:20177798:20177851-20179705:20179789:-:alternative2";
1	hq_isoforms.fasta.no5merge.collapsed.gff	exon	20179705	20179789	.	-	.	gene_id "RI:1:20177798:20177851-20179705:20179789:-"; transcript_id "RI:1:20177798:20177851-20179705:20179789:-:alternative2";
1	hq_isoforms.fasta.no5merge.collapsed.gff	exon	20177798	20179789	.	-	.	gene_id "RI:1:20177798:20177851-20179705:20179789:-"; transcript_id "RI:1:20177798:20177851-20179705:20179789:-:alternative1";
1	hq_isoforms.fasta.no5merge.collapsed.gff	exon	20177798	20177851	.	-	.	gene_id "RI:1:20177798:20177851-20179700:20179789:-"; transcript_id "RI:1:20177798:20177851-20179700:20179789:-:alternative2";
1	hq_isoforms.fasta.no5merge.collapsed.gff	exon	20179700	20179789	.	-	.	gene_id "RI:1:20177798:20177851-20179700:20179789:-"; transcript_id "RI:1:20177798:20177851-20179700:20179789:-:alternative2";
1	hq_isoforms.fasta.no5merge.collapsed.gff	exon	20177798	20179789	.	-	.	gene_id "RI:1:20177798:20177851-20179700:20179789:-"; transcript_id "RI:1:20177798:20177851-20179700:20179789:-:alternative1";
1	hq_isoforms.fasta.no5merge.collapsed.gff	exon	20409909	20409994	.	-	.	gene_id "RI:1:20409909:20409994-20411537:20411627:-"; transcript_id "RI:1:20409909:20409994-20411537:20411627:-:alternative2";
1	hq_isoforms.fasta.no5merge.collapsed.gff	exon	20411537	20411627	.	-	.	gene_id "RI:1:20409909:20409994-20411537:20411627:-"; transcript_id "RI:1:20409909:20409994-20411537:20411627:-:alternative2";
1	hq_isoforms.fasta.no5merge.collapsed.gff	exon	20409909	20411627	.	-	.	gene_id "RI:1:20409909:20409994-20411537:20411627:-"; transcript_id "RI:1:20409909:20409994-20411537:20411627:-:alternative1";
1	hq_isoforms.fasta.no5merge.collapsed.gff	exon	20414225	20414331	.	-	.	gene_id "RI:1:20414225:20414331-20415519:20415608:-"; transcript_id "RI:1:20414225:20414331-20415519:20415608:-:alternative2";
1	hq_isoforms.fasta.no5merge.collapsed.gff	exon	20415519	20415608	.	-	.	gene_id "RI:1:20414225:20414331-20415519:20415608:-"; transcript_id "RI:1:20414225:20414331-20415519:20415608:-:alternative2";
1	hq_isoforms.fasta.no5merge.collapsed.gff	exon	20414225	20415608	.	-	.	gene_id "RI:1:20414225:20414331-20415519:20415608:-"; transcript_id "RI:1:20414225:20414331-20415519:20415608:-:alternative1";
1	hq_isoforms.fasta.no5merge.collapsed.gff	exon	20495876	20495955	.	-	.	gene_id "RI:1:20495876:20495955-20496761:20496832:-"; transcript_id "RI:1:20495876:20495955-20496761:20496832:-:alternative2";
1	hq_isoforms.fasta.no5merge.collapsed.gff	exon	20496761	20496832	.	-	.	gene_id "RI:1:20495876:20495955-20496761:20496832:-"; transcript_id "RI:1:20495876:20495955-20496761:20496832:-:alternative2";
1	hq_isoforms.fasta.no5merge.collapsed.gff	exon	20495876	20496832	.	-	.	gene_id "RI:1:20495876:20495955-20496761:20496832:-"; transcript_id "RI:1:20495876:20495955-20496761:20496832:-:alternative1";
1	hq_isoforms.fasta.no5merge.collapsed.gff	exon	20600196	20600262	.	-	.	gene_id "RI:1:20600196:20600262-20601028:20601209:-"; transcript_id "RI:1:20600196:20600262-20601028:20601209:-:alternative2";
1	hq_isoforms.fasta.no5merge.collapsed.gff	exon	20601028	20601209	.	-	.	gene_id "RI:1:20600196:20600262-20601028:20601209:-"; transcript_id "RI:1:20600196:20600262-20601028:20601209:-:alternative2";
1	hq_isoforms.fasta.no5merge.collapsed.gff	exon	20600196	20601209	.	-	.	gene_id "RI:1:20600196:20600262-20601028:20601209:-"; transcript_id "RI:1:20600196:20600262-20601028:20601209:-:alternative1";
1	hq_isoforms.fasta.no5merge.collapsed.gff	exon	20597553	20600083	.	-	.	gene_id "RI:1:20597553:20600083-20600196:20601498:-"; transcript_id "RI:1:20597553:20600083-20600196:20601498:-:alternative2";
1	hq_isoforms.fasta.no5merge.collapsed.gff	exon	20600196	20601498	.	-	.	gene_id "RI:1:20597553:20600083-20600196:20601498:-"; transcript_id "RI:1:20597553:20600083-20600196:20601498:-:alternative2";
1	hq_isoforms.fasta.no5merge.collapsed.gff	exon	20597553	20601498	.	-	.	gene_id "RI:1:20597553:20600083-20600196:20601498:-"; transcript_id "RI:1:20597553:20600083-20600196:20601498:-:alternative1";
1	hq_isoforms.fasta.no5merge.collapsed.gff	exon	20646097	20646223	.	-	.	gene_id "RI:1:20646097:20646223-20648372:20648472:-"; transcript_id "RI:1:20646097:20646223-20648372:20648472:-:alternative2";
1	hq_isoforms.fasta.no5merge.collapsed.gff	exon	20648372	20648472	.	-	.	gene_id "RI:1:20646097:20646223-20648372:20648472:-"; transcript_id "RI:1:20646097:20646223-20648372:20648472:-:alternative2";
1	hq_isoforms.fasta.no5merge.collapsed.gff	exon	20646097	20648472	.	-	.	gene_id "RI:1:20646097:20646223-20648372:20648472:-"; transcript_id "RI:1:20646097:20646223-20648372:20648472:-:alternative1";
1	hq_isoforms.fasta.no5merge.collapsed.gff	exon	23635015	23635102	.	-	.	gene_id "RI:1:23635015:23635102-23635325:23635415:-"; transcript_id "RI:1:23635015:23635102-23635325:23635415:-:alternative2";
1	hq_isoforms.fasta.no5merge.collapsed.gff	exon	23635325	23635415	.	-	.	gene_id "RI:1:23635015:23635102-23635325:23635415:-"; transcript_id "RI:1:23635015:23635102-23635325:23635415:-:alternative2";
1	hq_isoforms.fasta.no5merge.collapsed.gff	exon	23635015	23635415	.	-	.	gene_id "RI:1:23635015:23635102-23635325:23635415:-"; transcript_id "RI:1:23635015:23635102-23635325:23635415:-:alternative1";
1	hq_isoforms.fasta.no5merge.collapsed.gff	exon	23635015	23635102	.	-	.	gene_id "RI:1:23635015:23635102-23635314:23635415:-"; transcript_id "RI:1:23635015:23635102-23635314:23635415:-:alternative2";
1	hq_isoforms.fasta.no5merge.collapsed.gff	exon	23635314	23635415	.	-	.	gene_id "RI:1:23635015:23635102-23635314:23635415:-"; transcript_id "RI:1:23635015:23635102-23635314:23635415:-:alternative2";
1	hq_isoforms.fasta.no5merge.collapsed.gff	exon	23635015	23635415	.	-	.	gene_id "RI:1:23635015:23635102-23635314:23635415:-"; transcript_id "RI:1:23635015:23635102-23635314:23635415:-:alternative1";
1	hq_isoforms.fasta.no5merge.collapsed.gff	exon	23696170	23696356	.	-	.	gene_id "RI:1:23696170:23696356-23698198:23698242:-"; transcript_id "RI:1:23696170:23696356-23698198:23698242:-:alternative2";
1	hq_isoforms.fasta.no5merge.collapsed.gff	exon	23698198	23698242	.	-	.	gene_id "RI:1:23696170:23696356-23698198:23698242:-"; transcript_id "RI:1:23696170:23696356-23698198:23698242:-:alternative2";
1	hq_isoforms.fasta.no5merge.collapsed.gff	exon	23696170	23698242	.	-	.	gene_id "RI:1:23696170:23696356-23698198:23698242:-"; transcript_id "RI:1:23696170:23696356-23698198:23698242:-:alternative1";
1	hq_isoforms.fasta.no5merge.collapsed.gff	exon	23698580	23698647	.	-	.	gene_id "RI:1:23698580:23698647-23700927:23703136:-"; transcript_id "RI:1:23698580:23698647-23700927:23703136:-:alternative2";
1	hq_isoforms.fasta.no5merge.collapsed.gff	exon	23700927	23703136	.	-	.	gene_id "RI:1:23698580:23698647-23700927:23703136:-"; transcript_id "RI:1:23698580:23698647-23700927:23703136:-:alternative2";
1	hq_isoforms.fasta.no5merge.collapsed.gff	exon	23698580	23703136	.	-	.	gene_id "RI:1:23698580:23698647-23700927:23703136:-"; transcript_id "RI:1:23698580:23698647-23700927:23703136:-:alternative1";
1	hq_isoforms.fasta.no5merge.collapsed.gff	exon	23698580	23698647	.	-	.	gene_id "RI:1:23698580:23698647-23702967:23703136:-"; transcript_id "RI:1:23698580:23698647-23702967:23703136:-:alternative2";
1	hq_isoforms.fasta.no5merge.collapsed.gff	exon	23702967	23703136	.	-	.	gene_id "RI:1:23698580:23698647-23702967:23703136:-"; transcript_id "RI:1:23698580:23698647-23702967:23703136:-:alternative2";
1	hq_isoforms.fasta.no5merge.collapsed.gff	exon	23698580	23703136	.	-	.	gene_id "RI:1:23698580:23698647-23702967:23703136:-"; transcript_id "RI:1:23698580:23698647-23702967:23703136:-:alternative1";
1	hq_isoforms.fasta.no5merge.collapsed.gff	exon	23700927	23700986	.	-	.	gene_id "RI:1:23700927:23700986-23702967:23703136:-"; transcript_id "RI:1:23700927:23700986-23702967:23703136:-:alternative2";
1	hq_isoforms.fasta.no5merge.collapsed.gff	exon	23702967	23703136	.	-	.	gene_id "RI:1:23700927:23700986-23702967:23703136:-"; transcript_id "RI:1:23700927:23700986-23702967:23703136:-:alternative2";
1	hq_isoforms.fasta.no5merge.collapsed.gff	exon	23700927	23703136	.	-	.	gene_id "RI:1:23700927:23700986-23702967:23703136:-"; transcript_id "RI:1:23700927:23700986-23702967:23703136:-:alternative1";
1	hq_isoforms.fasta.no5merge.collapsed.gff	exon	23696170	23696331	.	-	.	gene_id "RI:1:23696170:23696331-23698580:23698647:-"; transcript_id "RI:1:23696170:23696331-23698580:23698647:-:alternative2";
1	hq_isoforms.fasta.no5merge.collapsed.gff	exon	23698580	23698647	.	-	.	gene_id "RI:1:23696170:23696331-23698580:23698647:-"; transcript_id "RI:1:23696170:23696331-23698580:23698647:-:alternative2";
1	hq_isoforms.fasta.no5merge.collapsed.gff	exon	23696170	23698647	.	-	.	gene_id "RI:1:23696170:23696331-23698580:23698647:-"; transcript_id "RI:1:23696170:23696331-23698580:23698647:-:alternative1";
1	hq_isoforms.fasta.no5merge.collapsed.gff	exon	23696170	23696356	.	-	.	gene_id "RI:1:23696170:23696356-23698580:23698647:-"; transcript_id "RI:1:23696170:23696356-23698580:23698647:-:alternative2";
1	hq_isoforms.fasta.no5merge.collapsed.gff	exon	23698580	23698647	.	-	.	gene_id "RI:1:23696170:23696356-23698580:23698647:-"; transcript_id "RI:1:23696170:23696356-23698580:23698647:-:alternative2";
1	hq_isoforms.fasta.no5merge.collapsed.gff	exon	23696170	23698647	.	-	.	gene_id "RI:1:23696170:23696356-23698580:23698647:-"; transcript_id "RI:1:23696170:23696356-23698580:23698647:-:alternative1";
1	hq_isoforms.fasta.no5merge.collapsed.gff	exon	23704441	23704545	.	-	.	gene_id "RI:1:23704441:23704545-23705570:23705737:-"; transcript_id "RI:1:23704441:23704545-23705570:23705737:-:alternative2";
1	hq_isoforms.fasta.no5merge.collapsed.gff	exon	23705570	23705737	.	-	.	gene_id "RI:1:23704441:23704545-23705570:23705737:-"; transcript_id "RI:1:23704441:23704545-23705570:23705737:-:alternative2";
1	hq_isoforms.fasta.no5merge.collapsed.gff	exon	23704441	23705737	.	-	.	gene_id "RI:1:23704441:23704545-23705570:23705737:-"; transcript_id "RI:1:23704441:23704545-23705570:23705737:-:alternative1";
1	hq_isoforms.fasta.no5merge.collapsed.gff	exon	23795637	23795794	.	-	.	gene_id "RI:1:23795637:23795794-23796949:23797068:-"; transcript_id "RI:1:23795637:23795794-23796949:23797068:-:alternative2";
1	hq_isoforms.fasta.no5merge.collapsed.gff	exon	23796949	23797068	.	-	.	gene_id "RI:1:23795637:23795794-23796949:23797068:-"; transcript_id "RI:1:23795637:23795794-23796949:23797068:-:alternative2";
1	hq_isoforms.fasta.no5merge.collapsed.gff	exon	23795637	23797068	.	-	.	gene_id "RI:1:23795637:23795794-23796949:23797068:-"; transcript_id "RI:1:23795637:23795794-23796949:23797068:-:alternative1";
1	hq_isoforms.fasta.no5merge.collapsed.gff	exon	23795637	23795695	.	-	.	gene_id "RI:1:23795637:23795695-23796949:23797068:-"; transcript_id "RI:1:23795637:23795695-23796949:23797068:-:alternative2";
1	hq_isoforms.fasta.no5merge.collapsed.gff	exon	23796949	23797068	.	-	.	gene_id "RI:1:23795637:23795695-23796949:23797068:-"; transcript_id "RI:1:23795637:23795695-23796949:23797068:-:alternative2";
1	hq_isoforms.fasta.no5merge.collapsed.gff	exon	23795637	23797068	.	-	.	gene_id "RI:1:23795637:23795695-23796949:23797068:-"; transcript_id "RI:1:23795637:23795695-23796949:23797068:-:alternative1";
1	hq_isoforms.fasta.no5merge.collapsed.gff	exon	24912872	24913107	.	-	.	gene_id "RI:1:24912872:24913107-24916956:24917041:-"; transcript_id "RI:1:24912872:24913107-24916956:24917041:-:alternative2";
1	hq_isoforms.fasta.no5merge.collapsed.gff	exon	24916956	24917041	.	-	.	gene_id "RI:1:24912872:24913107-24916956:24917041:-"; transcript_id "RI:1:24912872:24913107-24916956:24917041:-:alternative2";
1	hq_isoforms.fasta.no5merge.collapsed.gff	exon	24912872	24917041	.	-	.	gene_id "RI:1:24912872:24913107-24916956:24917041:-"; transcript_id "RI:1:24912872:24913107-24916956:24917041:-:alternative1";
1	hq_isoforms.fasta.no5merge.collapsed.gff	exon	24919694	24919722	.	-	.	gene_id "RI:1:24919694:24919722-24921321:24921432:-"; transcript_id "RI:1:24919694:24919722-24921321:24921432:-:alternative2";
1	hq_isoforms.fasta.no5merge.collapsed.gff	exon	24921321	24921432	.	-	.	gene_id "RI:1:24919694:24919722-24921321:24921432:-"; transcript_id "RI:1:24919694:24919722-24921321:24921432:-:alternative2";
1	hq_isoforms.fasta.no5merge.collapsed.gff	exon	24919694	24921432	.	-	.	gene_id "RI:1:24919694:24919722-24921321:24921432:-"; transcript_id "RI:1:24919694:24919722-24921321:24921432:-:alternative1";
1	hq_isoforms.fasta.no5merge.collapsed.gff	exon	24923684	24923828	.	-	.	gene_id "RI:1:24923684:24923828-24924527:24925542:-"; transcript_id "RI:1:24923684:24923828-24924527:24925542:-:alternative2";
1	hq_isoforms.fasta.no5merge.collapsed.gff	exon	24924527	24925542	.	-	.	gene_id "RI:1:24923684:24923828-24924527:24925542:-"; transcript_id "RI:1:24923684:24923828-24924527:24925542:-:alternative2";
1	hq_isoforms.fasta.no5merge.collapsed.gff	exon	24923684	24925542	.	-	.	gene_id "RI:1:24923684:24923828-24924527:24925542:-"; transcript_id "RI:1:24923684:24923828-24924527:24925542:-:alternative1";
1	hq_isoforms.fasta.no5merge.collapsed.gff	exon	24927920	24927989	.	-	.	gene_id "RI:1:24927920:24927989-24928073:24928106:-"; transcript_id "RI:1:24927920:24927989-24928073:24928106:-:alternative2";
1	hq_isoforms.fasta.no5merge.collapsed.gff	exon	24928073	24928106	.	-	.	gene_id "RI:1:24927920:24927989-24928073:24928106:-"; transcript_id "RI:1:24927920:24927989-24928073:24928106:-:alternative2";
1	hq_isoforms.fasta.no5merge.collapsed.gff	exon	24927920	24928106	.	-	.	gene_id "RI:1:24927920:24927989-24928073:24928106:-"; transcript_id "RI:1:24927920:24927989-24928073:24928106:-:alternative1";
1	hq_isoforms.fasta.no5merge.collapsed.gff	exon	25286486	25286668	.	-	.	gene_id "RI:1:25286486:25286668-25287212:25287304:-"; transcript_id "RI:1:25286486:25286668-25287212:25287304:-:alternative2";
1	hq_isoforms.fasta.no5merge.collapsed.gff	exon	25287212	25287304	.	-	.	gene_id "RI:1:25286486:25286668-25287212:25287304:-"; transcript_id "RI:1:25286486:25286668-25287212:25287304:-:alternative2";
1	hq_isoforms.fasta.no5merge.collapsed.gff	exon	25286486	25287304	.	-	.	gene_id "RI:1:25286486:25286668-25287212:25287304:-"; transcript_id "RI:1:25286486:25286668-25287212:25287304:-:alternative1";
1	hq_isoforms.fasta.no5merge.collapsed.gff	exon	25407197	25407336	.	-	.	gene_id "RI:1:25407197:25407336-25410296:25410388:-"; transcript_id "RI:1:25407197:25407336-25410296:25410388:-:alternative2";
1	hq_isoforms.fasta.no5merge.collapsed.gff	exon	25410296	25410388	.	-	.	gene_id "RI:1:25407197:25407336-25410296:25410388:-"; transcript_id "RI:1:25407197:25407336-25410296:25410388:-:alternative2";
1	hq_isoforms.fasta.no5merge.collapsed.gff	exon	25407197	25410388	.	-	.	gene_id "RI:1:25407197:25407336-25410296:25410388:-"; transcript_id "RI:1:25407197:25407336-25410296:25410388:-:alternative1";
1	hq_isoforms.fasta.no5merge.collapsed.gff	exon	25639486	25639650	.	-	.	gene_id "RI:1:25639486:25639650-25642131:25642267:-"; transcript_id "RI:1:25639486:25639650-25642131:25642267:-:alternative2";
1	hq_isoforms.fasta.no5merge.collapsed.gff	exon	25642131	25642267	.	-	.	gene_id "RI:1:25639486:25639650-25642131:25642267:-"; transcript_id "RI:1:25639486:25639650-25642131:25642267:-:alternative2";
1	hq_isoforms.fasta.no5merge.collapsed.gff	exon	25639486	25642267	.	-	.	gene_id "RI:1:25639486:25639650-25642131:25642267:-"; transcript_id "RI:1:25639486:25639650-25642131:25642267:-:alternative1";
1	hq_isoforms.fasta.no5merge.collapsed.gff	exon	26514649	26514756	.	-	.	gene_id "RI:1:26514649:26514756-26514877:26514924:-"; transcript_id "RI:1:26514649:26514756-26514877:26514924:-:alternative2";
1	hq_isoforms.fasta.no5merge.collapsed.gff	exon	26514877	26514924	.	-	.	gene_id "RI:1:26514649:26514756-26514877:26514924:-"; transcript_id "RI:1:26514649:26514756-26514877:26514924:-:alternative2";
1	hq_isoforms.fasta.no5merge.collapsed.gff	exon	26514649	26514924	.	-	.	gene_id "RI:1:26514649:26514756-26514877:26514924:-"; transcript_id "RI:1:26514649:26514756-26514877:26514924:-:alternative1";
1	hq_isoforms.fasta.no5merge.collapsed.gff	exon	26674564	26674727	.	-	.	gene_id "RI:1:26674564:26674727-26676940:26677061:-"; transcript_id "RI:1:26674564:26674727-26676940:26677061:-:alternative2";
1	hq_isoforms.fasta.no5merge.collapsed.gff	exon	26676940	26677061	.	-	.	gene_id "RI:1:26674564:26674727-26676940:26677061:-"; transcript_id "RI:1:26674564:26674727-26676940:26677061:-:alternative2";
1	hq_isoforms.fasta.no5merge.collapsed.gff	exon	26674564	26677061	.	-	.	gene_id "RI:1:26674564:26674727-26676940:26677061:-"; transcript_id "RI:1:26674564:26674727-26676940:26677061:-:alternative1";
1	hq_isoforms.fasta.no5merge.collapsed.gff	exon	27697203	27697857	.	-	.	gene_id "RI:1:27697203:27697857-27699641:27699781:-"; transcript_id "RI:1:27697203:27697857-27699641:27699781:-:alternative2";
1	hq_isoforms.fasta.no5merge.collapsed.gff	exon	27699641	27699781	.	-	.	gene_id "RI:1:27697203:27697857-27699641:27699781:-"; transcript_id "RI:1:27697203:27697857-27699641:27699781:-:alternative2";
1	hq_isoforms.fasta.no5merge.collapsed.gff	exon	27697203	27699781	.	-	.	gene_id "RI:1:27697203:27697857-27699641:27699781:-"; transcript_id "RI:1:27697203:27697857-27699641:27699781:-:alternative1";
1	hq_isoforms.fasta.no5merge.collapsed.gff	exon	27766707	27766803	.	-	.	gene_id "RI:1:27766707:27766803-27767943:27768010:-"; transcript_id "RI:1:27766707:27766803-27767943:27768010:-:alternative2";
1	hq_isoforms.fasta.no5merge.collapsed.gff	exon	27767943	27768010	.	-	.	gene_id "RI:1:27766707:27766803-27767943:27768010:-"; transcript_id "RI:1:27766707:27766803-27767943:27768010:-:alternative2";
1	hq_isoforms.fasta.no5merge.collapsed.gff	exon	27766707	27768010	.	-	.	gene_id "RI:1:27766707:27766803-27767943:27768010:-"; transcript_id "RI:1:27766707:27766803-27767943:27768010:-:alternative1";
1	hq_isoforms.fasta.no5merge.collapsed.gff	exon	32401508	32401587	.	-	.	gene_id "RI:1:32401508:32401587-32401613:32401666:-"; transcript_id "RI:1:32401508:32401587-32401613:32401666:-:alternative2";
1	hq_isoforms.fasta.no5merge.collapsed.gff	exon	32401613	32401666	.	-	.	gene_id "RI:1:32401508:32401587-32401613:32401666:-"; transcript_id "RI:1:32401508:32401587-32401613:32401666:-:alternative2";
1	hq_isoforms.fasta.no5merge.collapsed.gff	exon	32401508	32401666	.	-	.	gene_id "RI:1:32401508:32401587-32401613:32401666:-"; transcript_id "RI:1:32401508:32401587-32401613:32401666:-:alternative1";
1	hq_isoforms.fasta.no5merge.collapsed.gff	exon	30411135	30411242	.	-	.	gene_id "RI:1:30411135:30411242-30411323:30414410:-"; transcript_id "RI:1:30411135:30411242-30411323:30414410:-:alternative2";
1	hq_isoforms.fasta.no5merge.collapsed.gff	exon	30411323	30414410	.	-	.	gene_id "RI:1:30411135:30411242-30411323:30414410:-"; transcript_id "RI:1:30411135:30411242-30411323:30414410:-:alternative2";
1	hq_isoforms.fasta.no5merge.collapsed.gff	exon	30411135	30414410	.	-	.	gene_id "RI:1:30411135:30411242-30411323:30414410:-"; transcript_id "RI:1:30411135:30411242-30411323:30414410:-:alternative1";
1	hq_isoforms.fasta.no5merge.collapsed.gff	exon	30411323	30414155	.	-	.	gene_id "RI:1:30411323:30414155-30414323:30414410:-"; transcript_id "RI:1:30411323:30414155-30414323:30414410:-:alternative2";
1	hq_isoforms.fasta.no5merge.collapsed.gff	exon	30414323	30414410	.	-	.	gene_id "RI:1:30411323:30414155-30414323:30414410:-"; transcript_id "RI:1:30411323:30414155-30414323:30414410:-:alternative2";
1	hq_isoforms.fasta.no5merge.collapsed.gff	exon	30411323	30414410	.	-	.	gene_id "RI:1:30411323:30414155-30414323:30414410:-"; transcript_id "RI:1:30411323:30414155-30414323:30414410:-:alternative1";
1	hq_isoforms.fasta.no5merge.collapsed.gff	exon	30411323	30411434	.	-	.	gene_id "RI:1:30411323:30411434-30414323:30414410:-"; transcript_id "RI:1:30411323:30411434-30414323:30414410:-:alternative2";
1	hq_isoforms.fasta.no5merge.collapsed.gff	exon	30414323	30414410	.	-	.	gene_id "RI:1:30411323:30411434-30414323:30414410:-"; transcript_id "RI:1:30411323:30411434-30414323:30414410:-:alternative2";
1	hq_isoforms.fasta.no5merge.collapsed.gff	exon	30411323	30414410	.	-	.	gene_id "RI:1:30411323:30411434-30414323:30414410:-"; transcript_id "RI:1:30411323:30411434-30414323:30414410:-:alternative1";
1	hq_isoforms.fasta.no5merge.collapsed.gff	exon	30496684	30497547	.	-	.	gene_id "RI:1:30496684:30497547-30497677:30497863:-"; transcript_id "RI:1:30496684:30497547-30497677:30497863:-:alternative2";
1	hq_isoforms.fasta.no5merge.collapsed.gff	exon	30497677	30497863	.	-	.	gene_id "RI:1:30496684:30497547-30497677:30497863:-"; transcript_id "RI:1:30496684:30497547-30497677:30497863:-:alternative2";
1	hq_isoforms.fasta.no5merge.collapsed.gff	exon	30496684	30497863	.	-	.	gene_id "RI:1:30496684:30497547-30497677:30497863:-"; transcript_id "RI:1:30496684:30497547-30497677:30497863:-:alternative1";
1	hq_isoforms.fasta.no5merge.collapsed.gff	exon	30497677	30497863	.	-	.	gene_id "RI:1:30497677:30497863-30498410:30498613:-"; transcript_id "RI:1:30497677:30497863-30498410:30498613:-:alternative2";
1	hq_isoforms.fasta.no5merge.collapsed.gff	exon	30498410	30498613	.	-	.	gene_id "RI:1:30497677:30497863-30498410:30498613:-"; transcript_id "RI:1:30497677:30497863-30498410:30498613:-:alternative2";
1	hq_isoforms.fasta.no5merge.collapsed.gff	exon	30497677	30498613	.	-	.	gene_id "RI:1:30497677:30497863-30498410:30498613:-"; transcript_id "RI:1:30497677:30497863-30498410:30498613:-:alternative1";
1	hq_isoforms.fasta.no5merge.collapsed.gff	exon	30786743	30786913	.	-	.	gene_id "RI:1:30786743:30786913-30790821:30790994:-"; transcript_id "RI:1:30786743:30786913-30790821:30790994:-:alternative2";
1	hq_isoforms.fasta.no5merge.collapsed.gff	exon	30790821	30790994	.	-	.	gene_id "RI:1:30786743:30786913-30790821:30790994:-"; transcript_id "RI:1:30786743:30786913-30790821:30790994:-:alternative2";
1	hq_isoforms.fasta.no5merge.collapsed.gff	exon	30786743	30790994	.	-	.	gene_id "RI:1:30786743:30786913-30790821:30790994:-"; transcript_id "RI:1:30786743:30786913-30790821:30790994:-:alternative1";
1	hq_isoforms.fasta.no5merge.collapsed.gff	exon	30927171	30928981	.	-	.	gene_id "RI:1:30927171:30928981-30930326:30930603:-"; transcript_id "RI:1:30927171:30928981-30930326:30930603:-:alternative2";
1	hq_isoforms.fasta.no5merge.collapsed.gff	exon	30930326	30930603	.	-	.	gene_id "RI:1:30927171:30928981-30930326:30930603:-"; transcript_id "RI:1:30927171:30928981-30930326:30930603:-:alternative2";
1	hq_isoforms.fasta.no5merge.collapsed.gff	exon	30927171	30930603	.	-	.	gene_id "RI:1:30927171:30928981-30930326:30930603:-"; transcript_id "RI:1:30927171:30928981-30930326:30930603:-:alternative1";
1	hq_isoforms.fasta.no5merge.collapsed.gff	exon	31844937	31845016	.	-	.	gene_id "RI:1:31844937:31845016-31847333:31847436:-"; transcript_id "RI:1:31844937:31845016-31847333:31847436:-:alternative2";
1	hq_isoforms.fasta.no5merge.collapsed.gff	exon	31847333	31847436	.	-	.	gene_id "RI:1:31844937:31845016-31847333:31847436:-"; transcript_id "RI:1:31844937:31845016-31847333:31847436:-:alternative2";
1	hq_isoforms.fasta.no5merge.collapsed.gff	exon	31844937	31847436	.	-	.	gene_id "RI:1:31844937:31845016-31847333:31847436:-"; transcript_id "RI:1:31844937:31845016-31847333:31847436:-:alternative1";
1	hq_isoforms.fasta.no5merge.collapsed.gff	exon	31844937	31845016	.	-	.	gene_id "RI:1:31844937:31845016-31847311:31847436:-"; transcript_id "RI:1:31844937:31845016-31847311:31847436:-:alternative2";
1	hq_isoforms.fasta.no5merge.collapsed.gff	exon	31847311	31847436	.	-	.	gene_id "RI:1:31844937:31845016-31847311:31847436:-"; transcript_id "RI:1:31844937:31845016-31847311:31847436:-:alternative2";
1	hq_isoforms.fasta.no5merge.collapsed.gff	exon	31844937	31847436	.	-	.	gene_id "RI:1:31844937:31845016-31847311:31847436:-"; transcript_id "RI:1:31844937:31845016-31847311:31847436:-:alternative1";
1	hq_isoforms.fasta.no5merge.collapsed.gff	exon	31898018	31899671	.	-	.	gene_id "RI:1:31898018:31899671-31899865:31899957:-"; transcript_id "RI:1:31898018:31899671-31899865:31899957:-:alternative2";
1	hq_isoforms.fasta.no5merge.collapsed.gff	exon	31899865	31899957	.	-	.	gene_id "RI:1:31898018:31899671-31899865:31899957:-"; transcript_id "RI:1:31898018:31899671-31899865:31899957:-:alternative2";
1	hq_isoforms.fasta.no5merge.collapsed.gff	exon	31898018	31899957	.	-	.	gene_id "RI:1:31898018:31899671-31899865:31899957:-"; transcript_id "RI:1:31898018:31899671-31899865:31899957:-:alternative1";
1	hq_isoforms.fasta.no5merge.collapsed.gff	exon	31898018	31898076	.	-	.	gene_id "RI:1:31898018:31898076-31898620:31899957:-"; transcript_id "RI:1:31898018:31898076-31898620:31899957:-:alternative2";
1	hq_isoforms.fasta.no5merge.collapsed.gff	exon	31898620	31899957	.	-	.	gene_id "RI:1:31898018:31898076-31898620:31899957:-"; transcript_id "RI:1:31898018:31898076-31898620:31899957:-:alternative2";
1	hq_isoforms.fasta.no5merge.collapsed.gff	exon	31898018	31899957	.	-	.	gene_id "RI:1:31898018:31898076-31898620:31899957:-"; transcript_id "RI:1:31898018:31898076-31898620:31899957:-:alternative1";
1	hq_isoforms.fasta.no5merge.collapsed.gff	exon	31898018	31898129	.	-	.	gene_id "RI:1:31898018:31898129-31899590:31899671:-"; transcript_id "RI:1:31898018:31898129-31899590:31899671:-:alternative2";
1	hq_isoforms.fasta.no5merge.collapsed.gff	exon	31899590	31899671	.	-	.	gene_id "RI:1:31898018:31898129-31899590:31899671:-"; transcript_id "RI:1:31898018:31898129-31899590:31899671:-:alternative2";
1	hq_isoforms.fasta.no5merge.collapsed.gff	exon	31898018	31899671	.	-	.	gene_id "RI:1:31898018:31898129-31899590:31899671:-"; transcript_id "RI:1:31898018:31898129-31899590:31899671:-:alternative1";
1	hq_isoforms.fasta.no5merge.collapsed.gff	exon	31898018	31898076	.	-	.	gene_id "RI:1:31898018:31898076-31899590:31899671:-"; transcript_id "RI:1:31898018:31898076-31899590:31899671:-:alternative2";
1	hq_isoforms.fasta.no5merge.collapsed.gff	exon	31899590	31899671	.	-	.	gene_id "RI:1:31898018:31898076-31899590:31899671:-"; transcript_id "RI:1:31898018:31898076-31899590:31899671:-:alternative2";
1	hq_isoforms.fasta.no5merge.collapsed.gff	exon	31898018	31899671	.	-	.	gene_id "RI:1:31898018:31898076-31899590:31899671:-"; transcript_id "RI:1:31898018:31898076-31899590:31899671:-:alternative1";
1	hq_isoforms.fasta.no5merge.collapsed.gff	exon	31896458	31896540	.	-	.	gene_id "RI:1:31896458:31896540-31898018:31899671:-"; transcript_id "RI:1:31896458:31896540-31898018:31899671:-:alternative2";
1	hq_isoforms.fasta.no5merge.collapsed.gff	exon	31898018	31899671	.	-	.	gene_id "RI:1:31896458:31896540-31898018:31899671:-"; transcript_id "RI:1:31896458:31896540-31898018:31899671:-:alternative2";
1	hq_isoforms.fasta.no5merge.collapsed.gff	exon	31896458	31899671	.	-	.	gene_id "RI:1:31896458:31896540-31898018:31899671:-"; transcript_id "RI:1:31896458:31896540-31898018:31899671:-:alternative1";
1	hq_isoforms.fasta.no5merge.collapsed.gff	exon	31896458	31896540	.	-	.	gene_id "RI:1:31896458:31896540-31899590:31899671:-"; transcript_id "RI:1:31896458:31896540-31899590:31899671:-:alternative2";
1	hq_isoforms.fasta.no5merge.collapsed.gff	exon	31899590	31899671	.	-	.	gene_id "RI:1:31896458:31896540-31899590:31899671:-"; transcript_id "RI:1:31896458:31896540-31899590:31899671:-:alternative2";
1	hq_isoforms.fasta.no5merge.collapsed.gff	exon	31896458	31899671	.	-	.	gene_id "RI:1:31896458:31896540-31899590:31899671:-"; transcript_id "RI:1:31896458:31896540-31899590:31899671:-:alternative1";
1	hq_isoforms.fasta.no5merge.collapsed.gff	exon	31896458	31899671	.	-	.	gene_id "RI:1:31896458:31899671-31899865:31899957:-"; transcript_id "RI:1:31896458:31899671-31899865:31899957:-:alternative2";
1	hq_isoforms.fasta.no5merge.collapsed.gff	exon	31899865	31899957	.	-	.	gene_id "RI:1:31896458:31899671-31899865:31899957:-"; transcript_id "RI:1:31896458:31899671-31899865:31899957:-:alternative2";
1	hq_isoforms.fasta.no5merge.collapsed.gff	exon	31896458	31899957	.	-	.	gene_id "RI:1:31896458:31899671-31899865:31899957:-"; transcript_id "RI:1:31896458:31899671-31899865:31899957:-:alternative1";
1	hq_isoforms.fasta.no5merge.collapsed.gff	exon	31896458	31896540	.	-	.	gene_id "RI:1:31896458:31896540-31898018:31899957:-"; transcript_id "RI:1:31896458:31896540-31898018:31899957:-:alternative2";
1	hq_isoforms.fasta.no5merge.collapsed.gff	exon	31898018	31899957	.	-	.	gene_id "RI:1:31896458:31896540-31898018:31899957:-"; transcript_id "RI:1:31896458:31896540-31898018:31899957:-:alternative2";
1	hq_isoforms.fasta.no5merge.collapsed.gff	exon	31896458	31899957	.	-	.	gene_id "RI:1:31896458:31896540-31898018:31899957:-"; transcript_id "RI:1:31896458:31896540-31898018:31899957:-:alternative1";
1	hq_isoforms.fasta.no5merge.collapsed.gff	exon	31895466	31895524	.	-	.	gene_id "RI:1:31895466:31895524-31896458:31896540:-"; transcript_id "RI:1:31895466:31895524-31896458:31896540:-:alternative2";
1	hq_isoforms.fasta.no5merge.collapsed.gff	exon	31896458	31896540	.	-	.	gene_id "RI:1:31895466:31895524-31896458:31896540:-"; transcript_id "RI:1:31895466:31895524-31896458:31896540:-:alternative2";
1	hq_isoforms.fasta.no5merge.collapsed.gff	exon	31895466	31896540	.	-	.	gene_id "RI:1:31895466:31895524-31896458:31896540:-"; transcript_id "RI:1:31895466:31895524-31896458:31896540:-:alternative1";
1	hq_isoforms.fasta.no5merge.collapsed.gff	exon	31889968	31892284	.	-	.	gene_id "RI:1:31889968:31892284-31892998:31893095:-"; transcript_id "RI:1:31889968:31892284-31892998:31893095:-:alternative2";
1	hq_isoforms.fasta.no5merge.collapsed.gff	exon	31892998	31893095	.	-	.	gene_id "RI:1:31889968:31892284-31892998:31893095:-"; transcript_id "RI:1:31889968:31892284-31892998:31893095:-:alternative2";
1	hq_isoforms.fasta.no5merge.collapsed.gff	exon	31889968	31893095	.	-	.	gene_id "RI:1:31889968:31892284-31892998:31893095:-"; transcript_id "RI:1:31889968:31892284-31892998:31893095:-:alternative1";
1	hq_isoforms.fasta.no5merge.collapsed.gff	exon	31894469	31894569	.	-	.	gene_id "RI:1:31894469:31894569-31894671:31894750:-"; transcript_id "RI:1:31894469:31894569-31894671:31894750:-:alternative2";
1	hq_isoforms.fasta.no5merge.collapsed.gff	exon	31894671	31894750	.	-	.	gene_id "RI:1:31894469:31894569-31894671:31894750:-"; transcript_id "RI:1:31894469:31894569-31894671:31894750:-:alternative2";
1	hq_isoforms.fasta.no5merge.collapsed.gff	exon	31894469	31894750	.	-	.	gene_id "RI:1:31894469:31894569-31894671:31894750:-"; transcript_id "RI:1:31894469:31894569-31894671:31894750:-:alternative1";
1	hq_isoforms.fasta.no5merge.collapsed.gff	exon	31893231	31893375	.	-	.	gene_id "RI:1:31893231:31893375-31894049:31894173:-"; transcript_id "RI:1:31893231:31893375-31894049:31894173:-:alternative2";
1	hq_isoforms.fasta.no5merge.collapsed.gff	exon	31894049	31894173	.	-	.	gene_id "RI:1:31893231:31893375-31894049:31894173:-"; transcript_id "RI:1:31893231:31893375-31894049:31894173:-:alternative2";
1	hq_isoforms.fasta.no5merge.collapsed.gff	exon	31893231	31894173	.	-	.	gene_id "RI:1:31893231:31893375-31894049:31894173:-"; transcript_id "RI:1:31893231:31893375-31894049:31894173:-:alternative1";
1	hq_isoforms.fasta.no5merge.collapsed.gff	exon	31895466	31895524	.	-	.	gene_id "RI:1:31895466:31895524-31896458:31899957:-"; transcript_id "RI:1:31895466:31895524-31896458:31899957:-:alternative2";
1	hq_isoforms.fasta.no5merge.collapsed.gff	exon	31896458	31899957	.	-	.	gene_id "RI:1:31895466:31895524-31896458:31899957:-"; transcript_id "RI:1:31895466:31895524-31896458:31899957:-:alternative2";
1	hq_isoforms.fasta.no5merge.collapsed.gff	exon	31895466	31899957	.	-	.	gene_id "RI:1:31895466:31895524-31896458:31899957:-"; transcript_id "RI:1:31895466:31895524-31896458:31899957:-:alternative1";
1	hq_isoforms.fasta.no5merge.collapsed.gff	exon	31903150	31903231	.	-	.	gene_id "RI:1:31903150:31903231-31903447:31903633:-"; transcript_id "RI:1:31903150:31903231-31903447:31903633:-:alternative2";
1	hq_isoforms.fasta.no5merge.collapsed.gff	exon	31903447	31903633	.	-	.	gene_id "RI:1:31903150:31903231-31903447:31903633:-"; transcript_id "RI:1:31903150:31903231-31903447:31903633:-:alternative2";
1	hq_isoforms.fasta.no5merge.collapsed.gff	exon	31903150	31903633	.	-	.	gene_id "RI:1:31903150:31903231-31903447:31903633:-"; transcript_id "RI:1:31903150:31903231-31903447:31903633:-:alternative1";
1	hq_isoforms.fasta.no5merge.collapsed.gff	exon	31903150	31903206	.	-	.	gene_id "RI:1:31903150:31903206-31903447:31903633:-"; transcript_id "RI:1:31903150:31903206-31903447:31903633:-:alternative2";
1	hq_isoforms.fasta.no5merge.collapsed.gff	exon	31903447	31903633	.	-	.	gene_id "RI:1:31903150:31903206-31903447:31903633:-"; transcript_id "RI:1:31903150:31903206-31903447:31903633:-:alternative2";
1	hq_isoforms.fasta.no5merge.collapsed.gff	exon	31903150	31903633	.	-	.	gene_id "RI:1:31903150:31903206-31903447:31903633:-"; transcript_id "RI:1:31903150:31903206-31903447:31903633:-:alternative1";
1	hq_isoforms.fasta.no5merge.collapsed.gff	exon	32388572	32388767	.	-	.	gene_id "RI:1:32388572:32388767-32389580:32391783:-"; transcript_id "RI:1:32388572:32388767-32389580:32391783:-:alternative2";
1	hq_isoforms.fasta.no5merge.collapsed.gff	exon	32389580	32391783	.	-	.	gene_id "RI:1:32388572:32388767-32389580:32391783:-"; transcript_id "RI:1:32388572:32388767-32389580:32391783:-:alternative2";
1	hq_isoforms.fasta.no5merge.collapsed.gff	exon	32388572	32391783	.	-	.	gene_id "RI:1:32388572:32388767-32389580:32391783:-"; transcript_id "RI:1:32388572:32388767-32389580:32391783:-:alternative1";
1	hq_isoforms.fasta.no5merge.collapsed.gff	exon	32391927	32391997	.	-	.	gene_id "RI:1:32391927:32391997-32392450:32393299:-"; transcript_id "RI:1:32391927:32391997-32392450:32393299:-:alternative2";
1	hq_isoforms.fasta.no5merge.collapsed.gff	exon	32392450	32393299	.	-	.	gene_id "RI:1:32391927:32391997-32392450:32393299:-"; transcript_id "RI:1:32391927:32391997-32392450:32393299:-:alternative2";
1	hq_isoforms.fasta.no5merge.collapsed.gff	exon	32391927	32393299	.	-	.	gene_id "RI:1:32391927:32391997-32392450:32393299:-"; transcript_id "RI:1:32391927:32391997-32392450:32393299:-:alternative1";
1	hq_isoforms.fasta.no5merge.collapsed.gff	exon	32389580	32389788	.	-	.	gene_id "RI:1:32389580:32389788-32391661:32391783:-"; transcript_id "RI:1:32389580:32389788-32391661:32391783:-:alternative2";
1	hq_isoforms.fasta.no5merge.collapsed.gff	exon	32391661	32391783	.	-	.	gene_id "RI:1:32389580:32389788-32391661:32391783:-"; transcript_id "RI:1:32389580:32389788-32391661:32391783:-:alternative2";
1	hq_isoforms.fasta.no5merge.collapsed.gff	exon	32389580	32391783	.	-	.	gene_id "RI:1:32389580:32389788-32391661:32391783:-"; transcript_id "RI:1:32389580:32389788-32391661:32391783:-:alternative1";
1	hq_isoforms.fasta.no5merge.collapsed.gff	exon	32389580	32389791	.	-	.	gene_id "RI:1:32389580:32389791-32391661:32391783:-"; transcript_id "RI:1:32389580:32389791-32391661:32391783:-:alternative2";
1	hq_isoforms.fasta.no5merge.collapsed.gff	exon	32391661	32391783	.	-	.	gene_id "RI:1:32389580:32389791-32391661:32391783:-"; transcript_id "RI:1:32389580:32389791-32391661:32391783:-:alternative2";
1	hq_isoforms.fasta.no5merge.collapsed.gff	exon	32389580	32391783	.	-	.	gene_id "RI:1:32389580:32389791-32391661:32391783:-"; transcript_id "RI:1:32389580:32389791-32391661:32391783:-:alternative1";
1	hq_isoforms.fasta.no5merge.collapsed.gff	exon	32389580	32391783	.	-	.	gene_id "RI:1:32389580:32391783-32391927:32391997:-"; transcript_id "RI:1:32389580:32391783-32391927:32391997:-:alternative2";
1	hq_isoforms.fasta.no5merge.collapsed.gff	exon	32391927	32391997	.	-	.	gene_id "RI:1:32389580:32391783-32391927:32391997:-"; transcript_id "RI:1:32389580:32391783-32391927:32391997:-:alternative2";
1	hq_isoforms.fasta.no5merge.collapsed.gff	exon	32389580	32391997	.	-	.	gene_id "RI:1:32389580:32391783-32391927:32391997:-"; transcript_id "RI:1:32389580:32391783-32391927:32391997:-:alternative1";
1	hq_isoforms.fasta.no5merge.collapsed.gff	exon	32384821	32385319	.	-	.	gene_id "RI:1:32384821:32385319-32386486:32386586:-"; transcript_id "RI:1:32384821:32385319-32386486:32386586:-:alternative2";
1	hq_isoforms.fasta.no5merge.collapsed.gff	exon	32386486	32386586	.	-	.	gene_id "RI:1:32384821:32385319-32386486:32386586:-"; transcript_id "RI:1:32384821:32385319-32386486:32386586:-:alternative2";
1	hq_isoforms.fasta.no5merge.collapsed.gff	exon	32384821	32386586	.	-	.	gene_id "RI:1:32384821:32385319-32386486:32386586:-"; transcript_id "RI:1:32384821:32385319-32386486:32386586:-:alternative1";
1	hq_isoforms.fasta.no5merge.collapsed.gff	exon	32704154	32704297	.	-	.	gene_id "RI:1:32704154:32704297-32705339:32705497:-"; transcript_id "RI:1:32704154:32704297-32705339:32705497:-:alternative2";
1	hq_isoforms.fasta.no5merge.collapsed.gff	exon	32705339	32705497	.	-	.	gene_id "RI:1:32704154:32704297-32705339:32705497:-"; transcript_id "RI:1:32704154:32704297-32705339:32705497:-:alternative2";
1	hq_isoforms.fasta.no5merge.collapsed.gff	exon	32704154	32705497	.	-	.	gene_id "RI:1:32704154:32704297-32705339:32705497:-"; transcript_id "RI:1:32704154:32704297-32705339:32705497:-:alternative1";
1	hq_isoforms.fasta.no5merge.collapsed.gff	exon	32705710	32706162	.	-	.	gene_id "RI:1:32705710:32706162-32706779:32707060:-"; transcript_id "RI:1:32705710:32706162-32706779:32707060:-:alternative2";
1	hq_isoforms.fasta.no5merge.collapsed.gff	exon	32706779	32707060	.	-	.	gene_id "RI:1:32705710:32706162-32706779:32707060:-"; transcript_id "RI:1:32705710:32706162-32706779:32707060:-:alternative2";
1	hq_isoforms.fasta.no5merge.collapsed.gff	exon	32705710	32707060	.	-	.	gene_id "RI:1:32705710:32706162-32706779:32707060:-"; transcript_id "RI:1:32705710:32706162-32706779:32707060:-:alternative1";
1	hq_isoforms.fasta.no5merge.collapsed.gff	exon	34827169	34827305	.	-	.	gene_id "RI:1:34827169:34827305-34827384:34827457:-"; transcript_id "RI:1:34827169:34827305-34827384:34827457:-:alternative2";
1	hq_isoforms.fasta.no5merge.collapsed.gff	exon	34827384	34827457	.	-	.	gene_id "RI:1:34827169:34827305-34827384:34827457:-"; transcript_id "RI:1:34827169:34827305-34827384:34827457:-:alternative2";
1	hq_isoforms.fasta.no5merge.collapsed.gff	exon	34827169	34827457	.	-	.	gene_id "RI:1:34827169:34827305-34827384:34827457:-"; transcript_id "RI:1:34827169:34827305-34827384:34827457:-:alternative1";
1	hq_isoforms.fasta.no5merge.collapsed.gff	exon	34831223	34831332	.	-	.	gene_id "RI:1:34831223:34831332-34832633:34832762:-"; transcript_id "RI:1:34831223:34831332-34832633:34832762:-:alternative2";
1	hq_isoforms.fasta.no5merge.collapsed.gff	exon	34832633	34832762	.	-	.	gene_id "RI:1:34831223:34831332-34832633:34832762:-"; transcript_id "RI:1:34831223:34831332-34832633:34832762:-:alternative2";
1	hq_isoforms.fasta.no5merge.collapsed.gff	exon	34831223	34832762	.	-	.	gene_id "RI:1:34831223:34831332-34832633:34832762:-"; transcript_id "RI:1:34831223:34831332-34832633:34832762:-:alternative1";
1	hq_isoforms.fasta.no5merge.collapsed.gff	exon	35012379	35012482	.	-	.	gene_id "RI:1:35012379:35012482-35013008:35013126:-"; transcript_id "RI:1:35012379:35012482-35013008:35013126:-:alternative2";
1	hq_isoforms.fasta.no5merge.collapsed.gff	exon	35013008	35013126	.	-	.	gene_id "RI:1:35012379:35012482-35013008:35013126:-"; transcript_id "RI:1:35012379:35012482-35013008:35013126:-:alternative2";
1	hq_isoforms.fasta.no5merge.collapsed.gff	exon	35012379	35013126	.	-	.	gene_id "RI:1:35012379:35012482-35013008:35013126:-"; transcript_id "RI:1:35012379:35012482-35013008:35013126:-:alternative1";
1	hq_isoforms.fasta.no5merge.collapsed.gff	exon	35690651	35690864	.	-	.	gene_id "RI:1:35690651:35690864-35691754:35691886:-"; transcript_id "RI:1:35690651:35690864-35691754:35691886:-:alternative2";
1	hq_isoforms.fasta.no5merge.collapsed.gff	exon	35691754	35691886	.	-	.	gene_id "RI:1:35690651:35690864-35691754:35691886:-"; transcript_id "RI:1:35690651:35690864-35691754:35691886:-:alternative2";
1	hq_isoforms.fasta.no5merge.collapsed.gff	exon	35690651	35691886	.	-	.	gene_id "RI:1:35690651:35690864-35691754:35691886:-"; transcript_id "RI:1:35690651:35690864-35691754:35691886:-:alternative1";
1	hq_isoforms.fasta.no5merge.collapsed.gff	exon	36420421	36420554	.	-	.	gene_id "RI:1:36420421:36420554-36422579:36422734:-"; transcript_id "RI:1:36420421:36420554-36422579:36422734:-:alternative2";
1	hq_isoforms.fasta.no5merge.collapsed.gff	exon	36422579	36422734	.	-	.	gene_id "RI:1:36420421:36420554-36422579:36422734:-"; transcript_id "RI:1:36420421:36420554-36422579:36422734:-:alternative2";
1	hq_isoforms.fasta.no5merge.collapsed.gff	exon	36420421	36422734	.	-	.	gene_id "RI:1:36420421:36420554-36422579:36422734:-"; transcript_id "RI:1:36420421:36420554-36422579:36422734:-:alternative1";
1	hq_isoforms.fasta.no5merge.collapsed.gff	exon	36420421	36420554	.	-	.	gene_id "RI:1:36420421:36420554-36422591:36422734:-"; transcript_id "RI:1:36420421:36420554-36422591:36422734:-:alternative2";
1	hq_isoforms.fasta.no5merge.collapsed.gff	exon	36422591	36422734	.	-	.	gene_id "RI:1:36420421:36420554-36422591:36422734:-"; transcript_id "RI:1:36420421:36420554-36422591:36422734:-:alternative2";
1	hq_isoforms.fasta.no5merge.collapsed.gff	exon	36420421	36422734	.	-	.	gene_id "RI:1:36420421:36420554-36422591:36422734:-"; transcript_id "RI:1:36420421:36420554-36422591:36422734:-:alternative1";
1	hq_isoforms.fasta.no5merge.collapsed.gff	exon	36882714	36882821	.	-	.	gene_id "RI:1:36882714:36882821-36886196:36886293:-"; transcript_id "RI:1:36882714:36882821-36886196:36886293:-:alternative2";
1	hq_isoforms.fasta.no5merge.collapsed.gff	exon	36886196	36886293	.	-	.	gene_id "RI:1:36882714:36882821-36886196:36886293:-"; transcript_id "RI:1:36882714:36882821-36886196:36886293:-:alternative2";
1	hq_isoforms.fasta.no5merge.collapsed.gff	exon	36882714	36886293	.	-	.	gene_id "RI:1:36882714:36882821-36886196:36886293:-"; transcript_id "RI:1:36882714:36882821-36886196:36886293:-:alternative1";
1	hq_isoforms.fasta.no5merge.collapsed.gff	exon	37143765	37148503	.	-	.	gene_id "RI:1:37143765:37148503-37149321:37149441:-"; transcript_id "RI:1:37143765:37148503-37149321:37149441:-:alternative2";
1	hq_isoforms.fasta.no5merge.collapsed.gff	exon	37149321	37149441	.	-	.	gene_id "RI:1:37143765:37148503-37149321:37149441:-"; transcript_id "RI:1:37143765:37148503-37149321:37149441:-:alternative2";
1	hq_isoforms.fasta.no5merge.collapsed.gff	exon	37143765	37149441	.	-	.	gene_id "RI:1:37143765:37148503-37149321:37149441:-"; transcript_id "RI:1:37143765:37148503-37149321:37149441:-:alternative1";
1	hq_isoforms.fasta.no5merge.collapsed.gff	exon	37158010	37158027	.	-	.	gene_id "RI:1:37158010:37158027-37158141:37158224:-"; transcript_id "RI:1:37158010:37158027-37158141:37158224:-:alternative2";
1	hq_isoforms.fasta.no5merge.collapsed.gff	exon	37158141	37158224	.	-	.	gene_id "RI:1:37158010:37158027-37158141:37158224:-"; transcript_id "RI:1:37158010:37158027-37158141:37158224:-:alternative2";
1	hq_isoforms.fasta.no5merge.collapsed.gff	exon	37158010	37158224	.	-	.	gene_id "RI:1:37158010:37158027-37158141:37158224:-"; transcript_id "RI:1:37158010:37158027-37158141:37158224:-:alternative1";
1	hq_isoforms.fasta.no5merge.collapsed.gff	exon	37636944	37637789	.	-	.	gene_id "RI:1:37636944:37637789-37637915:37637977:-"; transcript_id "RI:1:37636944:37637789-37637915:37637977:-:alternative2";
1	hq_isoforms.fasta.no5merge.collapsed.gff	exon	37637915	37637977	.	-	.	gene_id "RI:1:37636944:37637789-37637915:37637977:-"; transcript_id "RI:1:37636944:37637789-37637915:37637977:-:alternative2";
1	hq_isoforms.fasta.no5merge.collapsed.gff	exon	37636944	37637977	.	-	.	gene_id "RI:1:37636944:37637789-37637915:37637977:-"; transcript_id "RI:1:37636944:37637789-37637915:37637977:-:alternative1";
1	hq_isoforms.fasta.no5merge.collapsed.gff	exon	37636945	37637789	.	-	.	gene_id "RI:1:37636945:37637789-37637915:37637977:-"; transcript_id "RI:1:37636945:37637789-37637915:37637977:-:alternative2";
1	hq_isoforms.fasta.no5merge.collapsed.gff	exon	37637915	37637977	.	-	.	gene_id "RI:1:37636945:37637789-37637915:37637977:-"; transcript_id "RI:1:37636945:37637789-37637915:37637977:-:alternative2";
1	hq_isoforms.fasta.no5merge.collapsed.gff	exon	37636945	37637977	.	-	.	gene_id "RI:1:37636945:37637789-37637915:37637977:-"; transcript_id "RI:1:37636945:37637789-37637915:37637977:-:alternative1";
1	hq_isoforms.fasta.no5merge.collapsed.gff	exon	37639919	37639958	.	-	.	gene_id "RI:1:37639919:37639958-37640542:37640643:-"; transcript_id "RI:1:37639919:37639958-37640542:37640643:-:alternative2";
1	hq_isoforms.fasta.no5merge.collapsed.gff	exon	37640542	37640643	.	-	.	gene_id "RI:1:37639919:37639958-37640542:37640643:-"; transcript_id "RI:1:37639919:37639958-37640542:37640643:-:alternative2";
1	hq_isoforms.fasta.no5merge.collapsed.gff	exon	37639919	37640643	.	-	.	gene_id "RI:1:37639919:37639958-37640542:37640643:-"; transcript_id "RI:1:37639919:37639958-37640542:37640643:-:alternative1";
1	hq_isoforms.fasta.no5merge.collapsed.gff	exon	39235922	39237580	.	-	.	gene_id "RI:1:39235922:39237580-39239266:39239316:-"; transcript_id "RI:1:39235922:39237580-39239266:39239316:-:alternative2";
1	hq_isoforms.fasta.no5merge.collapsed.gff	exon	39239266	39239316	.	-	.	gene_id "RI:1:39235922:39237580-39239266:39239316:-"; transcript_id "RI:1:39235922:39237580-39239266:39239316:-:alternative2";
1	hq_isoforms.fasta.no5merge.collapsed.gff	exon	39235922	39239316	.	-	.	gene_id "RI:1:39235922:39237580-39239266:39239316:-"; transcript_id "RI:1:39235922:39237580-39239266:39239316:-:alternative1";
1	hq_isoforms.fasta.no5merge.collapsed.gff	exon	39241557	39241576	.	-	.	gene_id "RI:1:39241557:39241576-39241662:39241807:-"; transcript_id "RI:1:39241557:39241576-39241662:39241807:-:alternative2";
1	hq_isoforms.fasta.no5merge.collapsed.gff	exon	39241662	39241807	.	-	.	gene_id "RI:1:39241557:39241576-39241662:39241807:-"; transcript_id "RI:1:39241557:39241576-39241662:39241807:-:alternative2";
1	hq_isoforms.fasta.no5merge.collapsed.gff	exon	39241557	39241807	.	-	.	gene_id "RI:1:39241557:39241576-39241662:39241807:-"; transcript_id "RI:1:39241557:39241576-39241662:39241807:-:alternative1";
1	hq_isoforms.fasta.no5merge.collapsed.gff	exon	39334699	39334801	.	-	.	gene_id "RI:1:39334699:39334801-39335217:39335304:-"; transcript_id "RI:1:39334699:39334801-39335217:39335304:-:alternative2";
1	hq_isoforms.fasta.no5merge.collapsed.gff	exon	39335217	39335304	.	-	.	gene_id "RI:1:39334699:39334801-39335217:39335304:-"; transcript_id "RI:1:39334699:39334801-39335217:39335304:-:alternative2";
1	hq_isoforms.fasta.no5merge.collapsed.gff	exon	39334699	39335304	.	-	.	gene_id "RI:1:39334699:39334801-39335217:39335304:-"; transcript_id "RI:1:39334699:39334801-39335217:39335304:-:alternative1";
1	hq_isoforms.fasta.no5merge.collapsed.gff	exon	39338111	39338200	.	-	.	gene_id "RI:1:39338111:39338200-39339549:39339646:-"; transcript_id "RI:1:39338111:39338200-39339549:39339646:-:alternative2";
1	hq_isoforms.fasta.no5merge.collapsed.gff	exon	39339549	39339646	.	-	.	gene_id "RI:1:39338111:39338200-39339549:39339646:-"; transcript_id "RI:1:39338111:39338200-39339549:39339646:-:alternative2";
1	hq_isoforms.fasta.no5merge.collapsed.gff	exon	39338111	39339646	.	-	.	gene_id "RI:1:39338111:39338200-39339549:39339646:-"; transcript_id "RI:1:39338111:39338200-39339549:39339646:-:alternative1";
1	hq_isoforms.fasta.no5merge.collapsed.gff	exon	39716835	39716967	.	-	.	gene_id "RI:1:39716835:39716967-39717859:39718027:-"; transcript_id "RI:1:39716835:39716967-39717859:39718027:-:alternative2";
1	hq_isoforms.fasta.no5merge.collapsed.gff	exon	39717859	39718027	.	-	.	gene_id "RI:1:39716835:39716967-39717859:39718027:-"; transcript_id "RI:1:39716835:39716967-39717859:39718027:-:alternative2";
1	hq_isoforms.fasta.no5merge.collapsed.gff	exon	39716835	39718027	.	-	.	gene_id "RI:1:39716835:39716967-39717859:39718027:-"; transcript_id "RI:1:39716835:39716967-39717859:39718027:-:alternative1";
1	hq_isoforms.fasta.no5merge.collapsed.gff	exon	39719335	39721547	.	-	.	gene_id "RI:1:39719335:39721547-39722399:39722601:-"; transcript_id "RI:1:39719335:39721547-39722399:39722601:-:alternative2";
1	hq_isoforms.fasta.no5merge.collapsed.gff	exon	39722399	39722601	.	-	.	gene_id "RI:1:39719335:39721547-39722399:39722601:-"; transcript_id "RI:1:39719335:39721547-39722399:39722601:-:alternative2";
1	hq_isoforms.fasta.no5merge.collapsed.gff	exon	39719335	39722601	.	-	.	gene_id "RI:1:39719335:39721547-39722399:39722601:-"; transcript_id "RI:1:39719335:39721547-39722399:39722601:-:alternative1";
1	hq_isoforms.fasta.no5merge.collapsed.gff	exon	41145535	41145698	.	-	.	gene_id "RI:1:41145535:41145698-41149075:41149169:-"; transcript_id "RI:1:41145535:41145698-41149075:41149169:-:alternative2";
1	hq_isoforms.fasta.no5merge.collapsed.gff	exon	41149075	41149169	.	-	.	gene_id "RI:1:41145535:41145698-41149075:41149169:-"; transcript_id "RI:1:41145535:41145698-41149075:41149169:-:alternative2";
1	hq_isoforms.fasta.no5merge.collapsed.gff	exon	41145535	41149169	.	-	.	gene_id "RI:1:41145535:41145698-41149075:41149169:-"; transcript_id "RI:1:41145535:41145698-41149075:41149169:-:alternative1";
1	hq_isoforms.fasta.no5merge.collapsed.gff	exon	41158949	41159023	.	-	.	gene_id "RI:1:41158949:41159023-41161970:41162114:-"; transcript_id "RI:1:41158949:41159023-41161970:41162114:-:alternative2";
1	hq_isoforms.fasta.no5merge.collapsed.gff	exon	41161970	41162114	.	-	.	gene_id "RI:1:41158949:41159023-41161970:41162114:-"; transcript_id "RI:1:41158949:41159023-41161970:41162114:-:alternative2";
1	hq_isoforms.fasta.no5merge.collapsed.gff	exon	41158949	41162114	.	-	.	gene_id "RI:1:41158949:41159023-41161970:41162114:-"; transcript_id "RI:1:41158949:41159023-41161970:41162114:-:alternative1";
1	hq_isoforms.fasta.no5merge.collapsed.gff	exon	41158442	41158530	.	-	.	gene_id "RI:1:41158442:41158530-41158949:41162114:-"; transcript_id "RI:1:41158442:41158530-41158949:41162114:-:alternative2";
1	hq_isoforms.fasta.no5merge.collapsed.gff	exon	41158949	41162114	.	-	.	gene_id "RI:1:41158442:41158530-41158949:41162114:-"; transcript_id "RI:1:41158442:41158530-41158949:41162114:-:alternative2";
1	hq_isoforms.fasta.no5merge.collapsed.gff	exon	41158442	41162114	.	-	.	gene_id "RI:1:41158442:41158530-41158949:41162114:-"; transcript_id "RI:1:41158442:41158530-41158949:41162114:-:alternative1";
1	hq_isoforms.fasta.no5merge.collapsed.gff	exon	41812003	41812137	.	-	.	gene_id "RI:1:41812003:41812137-41813135:41813314:-"; transcript_id "RI:1:41812003:41812137-41813135:41813314:-:alternative2";
1	hq_isoforms.fasta.no5merge.collapsed.gff	exon	41813135	41813314	.	-	.	gene_id "RI:1:41812003:41812137-41813135:41813314:-"; transcript_id "RI:1:41812003:41812137-41813135:41813314:-:alternative2";
1	hq_isoforms.fasta.no5merge.collapsed.gff	exon	41812003	41813314	.	-	.	gene_id "RI:1:41812003:41812137-41813135:41813314:-"; transcript_id "RI:1:41812003:41812137-41813135:41813314:-:alternative1";
1	hq_isoforms.fasta.no5merge.collapsed.gff	exon	41808042	41808195	.	-	.	gene_id "RI:1:41808042:41808195-41808620:41808704:-"; transcript_id "RI:1:41808042:41808195-41808620:41808704:-:alternative2";
1	hq_isoforms.fasta.no5merge.collapsed.gff	exon	41808620	41808704	.	-	.	gene_id "RI:1:41808042:41808195-41808620:41808704:-"; transcript_id "RI:1:41808042:41808195-41808620:41808704:-:alternative2";
1	hq_isoforms.fasta.no5merge.collapsed.gff	exon	41808042	41808704	.	-	.	gene_id "RI:1:41808042:41808195-41808620:41808704:-"; transcript_id "RI:1:41808042:41808195-41808620:41808704:-:alternative1";
1	hq_isoforms.fasta.no5merge.collapsed.gff	exon	41908021	41910191	.	-	.	gene_id "RI:1:41908021:41910191-41911285:41911381:-"; transcript_id "RI:1:41908021:41910191-41911285:41911381:-:alternative2";
1	hq_isoforms.fasta.no5merge.collapsed.gff	exon	41911285	41911381	.	-	.	gene_id "RI:1:41908021:41910191-41911285:41911381:-"; transcript_id "RI:1:41908021:41910191-41911285:41911381:-:alternative2";
1	hq_isoforms.fasta.no5merge.collapsed.gff	exon	41908021	41911381	.	-	.	gene_id "RI:1:41908021:41910191-41911285:41911381:-"; transcript_id "RI:1:41908021:41910191-41911285:41911381:-:alternative1";
1	hq_isoforms.fasta.no5merge.collapsed.gff	exon	42089990	42090081	.	-	.	gene_id "RI:1:42089990:42090081-42091122:42091201:-"; transcript_id "RI:1:42089990:42090081-42091122:42091201:-:alternative2";
1	hq_isoforms.fasta.no5merge.collapsed.gff	exon	42091122	42091201	.	-	.	gene_id "RI:1:42089990:42090081-42091122:42091201:-"; transcript_id "RI:1:42089990:42090081-42091122:42091201:-:alternative2";
1	hq_isoforms.fasta.no5merge.collapsed.gff	exon	42089990	42091201	.	-	.	gene_id "RI:1:42089990:42090081-42091122:42091201:-"; transcript_id "RI:1:42089990:42090081-42091122:42091201:-:alternative1";
1	hq_isoforms.fasta.no5merge.collapsed.gff	exon	42122260	42122354	.	-	.	gene_id "RI:1:42122260:42122354-42122608:42122785:-"; transcript_id "RI:1:42122260:42122354-42122608:42122785:-:alternative2";
1	hq_isoforms.fasta.no5merge.collapsed.gff	exon	42122608	42122785	.	-	.	gene_id "RI:1:42122260:42122354-42122608:42122785:-"; transcript_id "RI:1:42122260:42122354-42122608:42122785:-:alternative2";
1	hq_isoforms.fasta.no5merge.collapsed.gff	exon	42122260	42122785	.	-	.	gene_id "RI:1:42122260:42122354-42122608:42122785:-"; transcript_id "RI:1:42122260:42122354-42122608:42122785:-:alternative1";
1	hq_isoforms.fasta.no5merge.collapsed.gff	exon	42137042	42137229	.	-	.	gene_id "RI:1:42137042:42137229-42137918:42138059:-"; transcript_id "RI:1:42137042:42137229-42137918:42138059:-:alternative2";
1	hq_isoforms.fasta.no5merge.collapsed.gff	exon	42137918	42138059	.	-	.	gene_id "RI:1:42137042:42137229-42137918:42138059:-"; transcript_id "RI:1:42137042:42137229-42137918:42138059:-:alternative2";
1	hq_isoforms.fasta.no5merge.collapsed.gff	exon	42137042	42138059	.	-	.	gene_id "RI:1:42137042:42137229-42137918:42138059:-"; transcript_id "RI:1:42137042:42137229-42137918:42138059:-:alternative1";
1	hq_isoforms.fasta.no5merge.collapsed.gff	exon	42342924	42343047	.	-	.	gene_id "RI:1:42342924:42343047-42343310:42343435:-"; transcript_id "RI:1:42342924:42343047-42343310:42343435:-:alternative2";
1	hq_isoforms.fasta.no5merge.collapsed.gff	exon	42343310	42343435	.	-	.	gene_id "RI:1:42342924:42343047-42343310:42343435:-"; transcript_id "RI:1:42342924:42343047-42343310:42343435:-:alternative2";
1	hq_isoforms.fasta.no5merge.collapsed.gff	exon	42342924	42343435	.	-	.	gene_id "RI:1:42342924:42343047-42343310:42343435:-"; transcript_id "RI:1:42342924:42343047-42343310:42343435:-:alternative1";
1	hq_isoforms.fasta.no5merge.collapsed.gff	exon	42352054	42352149	.	-	.	gene_id "RI:1:42352054:42352149-42354607:42354684:-"; transcript_id "RI:1:42352054:42352149-42354607:42354684:-:alternative2";
1	hq_isoforms.fasta.no5merge.collapsed.gff	exon	42354607	42354684	.	-	.	gene_id "RI:1:42352054:42352149-42354607:42354684:-"; transcript_id "RI:1:42352054:42352149-42354607:42354684:-:alternative2";
1	hq_isoforms.fasta.no5merge.collapsed.gff	exon	42352054	42354684	.	-	.	gene_id "RI:1:42352054:42352149-42354607:42354684:-"; transcript_id "RI:1:42352054:42352149-42354607:42354684:-:alternative1";
1	hq_isoforms.fasta.no5merge.collapsed.gff	exon	42421250	42422338	.	-	.	gene_id "RI:1:42421250:42422338-42423180:42423271:-"; transcript_id "RI:1:42421250:42422338-42423180:42423271:-:alternative2";
1	hq_isoforms.fasta.no5merge.collapsed.gff	exon	42423180	42423271	.	-	.	gene_id "RI:1:42421250:42422338-42423180:42423271:-"; transcript_id "RI:1:42421250:42422338-42423180:42423271:-:alternative2";
1	hq_isoforms.fasta.no5merge.collapsed.gff	exon	42421250	42423271	.	-	.	gene_id "RI:1:42421250:42422338-42423180:42423271:-"; transcript_id "RI:1:42421250:42422338-42423180:42423271:-:alternative1";
1	hq_isoforms.fasta.no5merge.collapsed.gff	exon	42421250	42421444	.	-	.	gene_id "RI:1:42421250:42421444-42423180:42423271:-"; transcript_id "RI:1:42421250:42421444-42423180:42423271:-:alternative2";
1	hq_isoforms.fasta.no5merge.collapsed.gff	exon	42423180	42423271	.	-	.	gene_id "RI:1:42421250:42421444-42423180:42423271:-"; transcript_id "RI:1:42421250:42421444-42423180:42423271:-:alternative2";
1	hq_isoforms.fasta.no5merge.collapsed.gff	exon	42421250	42423271	.	-	.	gene_id "RI:1:42421250:42421444-42423180:42423271:-"; transcript_id "RI:1:42421250:42421444-42423180:42423271:-:alternative1";
1	hq_isoforms.fasta.no5merge.collapsed.gff	exon	42421250	42421444	.	-	.	gene_id "RI:1:42421250:42421444-42422309:42422338:-"; transcript_id "RI:1:42421250:42421444-42422309:42422338:-:alternative2";
1	hq_isoforms.fasta.no5merge.collapsed.gff	exon	42422309	42422338	.	-	.	gene_id "RI:1:42421250:42421444-42422309:42422338:-"; transcript_id "RI:1:42421250:42421444-42422309:42422338:-:alternative2";
1	hq_isoforms.fasta.no5merge.collapsed.gff	exon	42421250	42422338	.	-	.	gene_id "RI:1:42421250:42421444-42422309:42422338:-"; transcript_id "RI:1:42421250:42421444-42422309:42422338:-:alternative1";
1	hq_isoforms.fasta.no5merge.collapsed.gff	exon	42423180	42423271	.	-	.	gene_id "RI:1:42423180:42423271-42425488:42425664:-"; transcript_id "RI:1:42423180:42423271-42425488:42425664:-:alternative2";
1	hq_isoforms.fasta.no5merge.collapsed.gff	exon	42425488	42425664	.	-	.	gene_id "RI:1:42423180:42423271-42425488:42425664:-"; transcript_id "RI:1:42423180:42423271-42425488:42425664:-:alternative2";
1	hq_isoforms.fasta.no5merge.collapsed.gff	exon	42423180	42425664	.	-	.	gene_id "RI:1:42423180:42423271-42425488:42425664:-"; transcript_id "RI:1:42423180:42423271-42425488:42425664:-:alternative1";
1	hq_isoforms.fasta.no5merge.collapsed.gff	exon	42696732	42697222	.	-	.	gene_id "RI:1:42696732:42697222-42698840:42699475:-"; transcript_id "RI:1:42696732:42697222-42698840:42699475:-:alternative2";
1	hq_isoforms.fasta.no5merge.collapsed.gff	exon	42698840	42699475	.	-	.	gene_id "RI:1:42696732:42697222-42698840:42699475:-"; transcript_id "RI:1:42696732:42697222-42698840:42699475:-:alternative2";
1	hq_isoforms.fasta.no5merge.collapsed.gff	exon	42696732	42699475	.	-	.	gene_id "RI:1:42696732:42697222-42698840:42699475:-"; transcript_id "RI:1:42696732:42697222-42698840:42699475:-:alternative1";
1	hq_isoforms.fasta.no5merge.collapsed.gff	exon	42700990	42701078	.	-	.	gene_id "RI:1:42700990:42701078-42701614:42701687:-"; transcript_id "RI:1:42700990:42701078-42701614:42701687:-:alternative2";
1	hq_isoforms.fasta.no5merge.collapsed.gff	exon	42701614	42701687	.	-	.	gene_id "RI:1:42700990:42701078-42701614:42701687:-"; transcript_id "RI:1:42700990:42701078-42701614:42701687:-:alternative2";
1	hq_isoforms.fasta.no5merge.collapsed.gff	exon	42700990	42701687	.	-	.	gene_id "RI:1:42700990:42701078-42701614:42701687:-"; transcript_id "RI:1:42700990:42701078-42701614:42701687:-:alternative1";
1	hq_isoforms.fasta.no5merge.collapsed.gff	exon	43353749	43353820	.	-	.	gene_id "RI:1:43353749:43353820-43354337:43354455:-"; transcript_id "RI:1:43353749:43353820-43354337:43354455:-:alternative2";
1	hq_isoforms.fasta.no5merge.collapsed.gff	exon	43354337	43354455	.	-	.	gene_id "RI:1:43353749:43353820-43354337:43354455:-"; transcript_id "RI:1:43353749:43353820-43354337:43354455:-:alternative2";
1	hq_isoforms.fasta.no5merge.collapsed.gff	exon	43353749	43354455	.	-	.	gene_id "RI:1:43353749:43353820-43354337:43354455:-"; transcript_id "RI:1:43353749:43353820-43354337:43354455:-:alternative1";
1	hq_isoforms.fasta.no5merge.collapsed.gff	exon	43463355	43463729	.	-	.	gene_id "RI:1:43463355:43463729-43464594:43466919:-"; transcript_id "RI:1:43463355:43463729-43464594:43466919:-:alternative2";
1	hq_isoforms.fasta.no5merge.collapsed.gff	exon	43464594	43466919	.	-	.	gene_id "RI:1:43463355:43463729-43464594:43466919:-"; transcript_id "RI:1:43463355:43463729-43464594:43466919:-:alternative2";
1	hq_isoforms.fasta.no5merge.collapsed.gff	exon	43463355	43466919	.	-	.	gene_id "RI:1:43463355:43463729-43464594:43466919:-"; transcript_id "RI:1:43463355:43463729-43464594:43466919:-:alternative1";
1	hq_isoforms.fasta.no5merge.collapsed.gff	exon	43600340	43600547	.	-	.	gene_id "RI:1:43600340:43600547-43601985:43602132:-"; transcript_id "RI:1:43600340:43600547-43601985:43602132:-:alternative2";
1	hq_isoforms.fasta.no5merge.collapsed.gff	exon	43601985	43602132	.	-	.	gene_id "RI:1:43600340:43600547-43601985:43602132:-"; transcript_id "RI:1:43600340:43600547-43601985:43602132:-:alternative2";
1	hq_isoforms.fasta.no5merge.collapsed.gff	exon	43600340	43602132	.	-	.	gene_id "RI:1:43600340:43600547-43601985:43602132:-"; transcript_id "RI:1:43600340:43600547-43601985:43602132:-:alternative1";
1	hq_isoforms.fasta.no5merge.collapsed.gff	exon	43682011	43682068	.	-	.	gene_id "RI:1:43682011:43682068-43687758:43687882:-"; transcript_id "RI:1:43682011:43682068-43687758:43687882:-:alternative2";
1	hq_isoforms.fasta.no5merge.collapsed.gff	exon	43687758	43687882	.	-	.	gene_id "RI:1:43682011:43682068-43687758:43687882:-"; transcript_id "RI:1:43682011:43682068-43687758:43687882:-:alternative2";
1	hq_isoforms.fasta.no5merge.collapsed.gff	exon	43682011	43687882	.	-	.	gene_id "RI:1:43682011:43682068-43687758:43687882:-"; transcript_id "RI:1:43682011:43682068-43687758:43687882:-:alternative1";
1	hq_isoforms.fasta.no5merge.collapsed.gff	exon	44265276	44265394	.	-	.	gene_id "RI:1:44265276:44265394-44267081:44267213:-"; transcript_id "RI:1:44265276:44265394-44267081:44267213:-:alternative2";
1	hq_isoforms.fasta.no5merge.collapsed.gff	exon	44267081	44267213	.	-	.	gene_id "RI:1:44265276:44265394-44267081:44267213:-"; transcript_id "RI:1:44265276:44265394-44267081:44267213:-:alternative2";
1	hq_isoforms.fasta.no5merge.collapsed.gff	exon	44265276	44267213	.	-	.	gene_id "RI:1:44265276:44265394-44267081:44267213:-"; transcript_id "RI:1:44265276:44265394-44267081:44267213:-:alternative1";
1	hq_isoforms.fasta.no5merge.collapsed.gff	exon	44279629	44279786	.	-	.	gene_id "RI:1:44279629:44279786-44286312:44286509:-"; transcript_id "RI:1:44279629:44279786-44286312:44286509:-:alternative2";
1	hq_isoforms.fasta.no5merge.collapsed.gff	exon	44286312	44286509	.	-	.	gene_id "RI:1:44279629:44279786-44286312:44286509:-"; transcript_id "RI:1:44279629:44279786-44286312:44286509:-:alternative2";
1	hq_isoforms.fasta.no5merge.collapsed.gff	exon	44279629	44286509	.	-	.	gene_id "RI:1:44279629:44279786-44286312:44286509:-"; transcript_id "RI:1:44279629:44279786-44286312:44286509:-:alternative1";
1	hq_isoforms.fasta.no5merge.collapsed.gff	exon	44297960	44298095	.	-	.	gene_id "RI:1:44297960:44298095-44298822:44298945:-"; transcript_id "RI:1:44297960:44298095-44298822:44298945:-:alternative2";
1	hq_isoforms.fasta.no5merge.collapsed.gff	exon	44298822	44298945	.	-	.	gene_id "RI:1:44297960:44298095-44298822:44298945:-"; transcript_id "RI:1:44297960:44298095-44298822:44298945:-:alternative2";
1	hq_isoforms.fasta.no5merge.collapsed.gff	exon	44297960	44298945	.	-	.	gene_id "RI:1:44297960:44298095-44298822:44298945:-"; transcript_id "RI:1:44297960:44298095-44298822:44298945:-:alternative1";
1	hq_isoforms.fasta.no5merge.collapsed.gff	exon	44847303	44847428	.	-	.	gene_id "RI:1:44847303:44847428-44848203:44848331:-"; transcript_id "RI:1:44847303:44847428-44848203:44848331:-:alternative2";
1	hq_isoforms.fasta.no5merge.collapsed.gff	exon	44848203	44848331	.	-	.	gene_id "RI:1:44847303:44847428-44848203:44848331:-"; transcript_id "RI:1:44847303:44847428-44848203:44848331:-:alternative2";
1	hq_isoforms.fasta.no5merge.collapsed.gff	exon	44847303	44848331	.	-	.	gene_id "RI:1:44847303:44847428-44848203:44848331:-"; transcript_id "RI:1:44847303:44847428-44848203:44848331:-:alternative1";
1	hq_isoforms.fasta.no5merge.collapsed.gff	exon	44900766	44900860	.	-	.	gene_id "RI:1:44900766:44900860-44902148:44902258:-"; transcript_id "RI:1:44900766:44900860-44902148:44902258:-:alternative2";
1	hq_isoforms.fasta.no5merge.collapsed.gff	exon	44902148	44902258	.	-	.	gene_id "RI:1:44900766:44900860-44902148:44902258:-"; transcript_id "RI:1:44900766:44900860-44902148:44902258:-:alternative2";
1	hq_isoforms.fasta.no5merge.collapsed.gff	exon	44900766	44902258	.	-	.	gene_id "RI:1:44900766:44900860-44902148:44902258:-"; transcript_id "RI:1:44900766:44900860-44902148:44902258:-:alternative1";
1	hq_isoforms.fasta.no5merge.collapsed.gff	exon	45496935	45497454	.	-	.	gene_id "RI:1:45496935:45497454-45497579:45500217:-"; transcript_id "RI:1:45496935:45497454-45497579:45500217:-:alternative2";
1	hq_isoforms.fasta.no5merge.collapsed.gff	exon	45497579	45500217	.	-	.	gene_id "RI:1:45496935:45497454-45497579:45500217:-"; transcript_id "RI:1:45496935:45497454-45497579:45500217:-:alternative2";
1	hq_isoforms.fasta.no5merge.collapsed.gff	exon	45496935	45500217	.	-	.	gene_id "RI:1:45496935:45497454-45497579:45500217:-"; transcript_id "RI:1:45496935:45497454-45497579:45500217:-:alternative1";
1	hq_isoforms.fasta.no5merge.collapsed.gff	exon	45540735	45540935	.	-	.	gene_id "RI:1:45540735:45540935-45543835:45543967:-"; transcript_id "RI:1:45540735:45540935-45543835:45543967:-:alternative2";
1	hq_isoforms.fasta.no5merge.collapsed.gff	exon	45543835	45543967	.	-	.	gene_id "RI:1:45540735:45540935-45543835:45543967:-"; transcript_id "RI:1:45540735:45540935-45543835:45543967:-:alternative2";
1	hq_isoforms.fasta.no5merge.collapsed.gff	exon	45540735	45543967	.	-	.	gene_id "RI:1:45540735:45540935-45543835:45543967:-"; transcript_id "RI:1:45540735:45540935-45543835:45543967:-:alternative1";
1	hq_isoforms.fasta.no5merge.collapsed.gff	exon	45627399	45627570	.	-	.	gene_id "RI:1:45627399:45627570-45629768:45629915:-"; transcript_id "RI:1:45627399:45627570-45629768:45629915:-:alternative2";
1	hq_isoforms.fasta.no5merge.collapsed.gff	exon	45629768	45629915	.	-	.	gene_id "RI:1:45627399:45627570-45629768:45629915:-"; transcript_id "RI:1:45627399:45627570-45629768:45629915:-:alternative2";
1	hq_isoforms.fasta.no5merge.collapsed.gff	exon	45627399	45629915	.	-	.	gene_id "RI:1:45627399:45627570-45629768:45629915:-"; transcript_id "RI:1:45627399:45627570-45629768:45629915:-:alternative1";
1	hq_isoforms.fasta.no5merge.collapsed.gff	exon	45618193	45619195	.	-	.	gene_id "RI:1:45618193:45619195-45620285:45620380:-"; transcript_id "RI:1:45618193:45619195-45620285:45620380:-:alternative2";
1	hq_isoforms.fasta.no5merge.collapsed.gff	exon	45620285	45620380	.	-	.	gene_id "RI:1:45618193:45619195-45620285:45620380:-"; transcript_id "RI:1:45618193:45619195-45620285:45620380:-:alternative2";
1	hq_isoforms.fasta.no5merge.collapsed.gff	exon	45618193	45620380	.	-	.	gene_id "RI:1:45618193:45619195-45620285:45620380:-"; transcript_id "RI:1:45618193:45619195-45620285:45620380:-:alternative1";
1	hq_isoforms.fasta.no5merge.collapsed.gff	exon	46015599	46015780	.	-	.	gene_id "RI:1:46015599:46015780-46017487:46017648:-"; transcript_id "RI:1:46015599:46015780-46017487:46017648:-:alternative2";
1	hq_isoforms.fasta.no5merge.collapsed.gff	exon	46017487	46017648	.	-	.	gene_id "RI:1:46015599:46015780-46017487:46017648:-"; transcript_id "RI:1:46015599:46015780-46017487:46017648:-:alternative2";
1	hq_isoforms.fasta.no5merge.collapsed.gff	exon	46015599	46017648	.	-	.	gene_id "RI:1:46015599:46015780-46017487:46017648:-"; transcript_id "RI:1:46015599:46015780-46017487:46017648:-:alternative1";
1	hq_isoforms.fasta.no5merge.collapsed.gff	exon	48846300	48846990	.	-	.	gene_id "RI:1:48846300:48846990-48847343:48847430:-"; transcript_id "RI:1:48846300:48846990-48847343:48847430:-:alternative2";
1	hq_isoforms.fasta.no5merge.collapsed.gff	exon	48847343	48847430	.	-	.	gene_id "RI:1:48846300:48846990-48847343:48847430:-"; transcript_id "RI:1:48846300:48846990-48847343:48847430:-:alternative2";
1	hq_isoforms.fasta.no5merge.collapsed.gff	exon	48846300	48847430	.	-	.	gene_id "RI:1:48846300:48846990-48847343:48847430:-"; transcript_id "RI:1:48846300:48846990-48847343:48847430:-:alternative1";
1	hq_isoforms.fasta.no5merge.collapsed.gff	exon	48873596	48874051	.	-	.	gene_id "RI:1:48873596:48874051-48875178:48875342:-"; transcript_id "RI:1:48873596:48874051-48875178:48875342:-:alternative2";
1	hq_isoforms.fasta.no5merge.collapsed.gff	exon	48875178	48875342	.	-	.	gene_id "RI:1:48873596:48874051-48875178:48875342:-"; transcript_id "RI:1:48873596:48874051-48875178:48875342:-:alternative2";
1	hq_isoforms.fasta.no5merge.collapsed.gff	exon	48873596	48875342	.	-	.	gene_id "RI:1:48873596:48874051-48875178:48875342:-"; transcript_id "RI:1:48873596:48874051-48875178:48875342:-:alternative1";
1	hq_isoforms.fasta.no5merge.collapsed.gff	exon	48875579	48875684	.	-	.	gene_id "RI:1:48875579:48875684-48875774:48875910:-"; transcript_id "RI:1:48875579:48875684-48875774:48875910:-:alternative2";
1	hq_isoforms.fasta.no5merge.collapsed.gff	exon	48875774	48875910	.	-	.	gene_id "RI:1:48875579:48875684-48875774:48875910:-"; transcript_id "RI:1:48875579:48875684-48875774:48875910:-:alternative2";
1	hq_isoforms.fasta.no5merge.collapsed.gff	exon	48875579	48875910	.	-	.	gene_id "RI:1:48875579:48875684-48875774:48875910:-"; transcript_id "RI:1:48875579:48875684-48875774:48875910:-:alternative1";
1	hq_isoforms.fasta.no5merge.collapsed.gff	exon	48898455	48898624	.	-	.	gene_id "RI:1:48898455:48898624-48900846:48901040:-"; transcript_id "RI:1:48898455:48898624-48900846:48901040:-:alternative2";
1	hq_isoforms.fasta.no5merge.collapsed.gff	exon	48900846	48901040	.	-	.	gene_id "RI:1:48898455:48898624-48900846:48901040:-"; transcript_id "RI:1:48898455:48898624-48900846:48901040:-:alternative2";
1	hq_isoforms.fasta.no5merge.collapsed.gff	exon	48898455	48901040	.	-	.	gene_id "RI:1:48898455:48898624-48900846:48901040:-"; transcript_id "RI:1:48898455:48898624-48900846:48901040:-:alternative1";
1	hq_isoforms.fasta.no5merge.collapsed.gff	exon	51850475	51850482	.	-	.	gene_id "RI:1:51850475:51850482-51850768:51850873:-"; transcript_id "RI:1:51850475:51850482-51850768:51850873:-:alternative2";
1	hq_isoforms.fasta.no5merge.collapsed.gff	exon	51850768	51850873	.	-	.	gene_id "RI:1:51850475:51850482-51850768:51850873:-"; transcript_id "RI:1:51850475:51850482-51850768:51850873:-:alternative2";
1	hq_isoforms.fasta.no5merge.collapsed.gff	exon	51850475	51850873	.	-	.	gene_id "RI:1:51850475:51850482-51850768:51850873:-"; transcript_id "RI:1:51850475:51850482-51850768:51850873:-:alternative1";
1	hq_isoforms.fasta.no5merge.collapsed.gff	exon	51969458	51969482	.	-	.	gene_id "RI:1:51969458:51969482-51971565:51971729:-"; transcript_id "RI:1:51969458:51969482-51971565:51971729:-:alternative2";
1	hq_isoforms.fasta.no5merge.collapsed.gff	exon	51971565	51971729	.	-	.	gene_id "RI:1:51969458:51969482-51971565:51971729:-"; transcript_id "RI:1:51969458:51969482-51971565:51971729:-:alternative2";
1	hq_isoforms.fasta.no5merge.collapsed.gff	exon	51969458	51971729	.	-	.	gene_id "RI:1:51969458:51969482-51971565:51971729:-"; transcript_id "RI:1:51969458:51969482-51971565:51971729:-:alternative1";
1	hq_isoforms.fasta.no5merge.collapsed.gff	exon	51984359	51984447	.	-	.	gene_id "RI:1:51984359:51984447-51985024:51985263:-"; transcript_id "RI:1:51984359:51984447-51985024:51985263:-:alternative2";
1	hq_isoforms.fasta.no5merge.collapsed.gff	exon	51985024	51985263	.	-	.	gene_id "RI:1:51984359:51984447-51985024:51985263:-"; transcript_id "RI:1:51984359:51984447-51985024:51985263:-:alternative2";
1	hq_isoforms.fasta.no5merge.collapsed.gff	exon	51984359	51985263	.	-	.	gene_id "RI:1:51984359:51984447-51985024:51985263:-"; transcript_id "RI:1:51984359:51984447-51985024:51985263:-:alternative1";
1	hq_isoforms.fasta.no5merge.collapsed.gff	exon	52091805	52092212	.	-	.	gene_id "RI:1:52091805:52092212-52094632:52094748:-"; transcript_id "RI:1:52091805:52092212-52094632:52094748:-:alternative2";
1	hq_isoforms.fasta.no5merge.collapsed.gff	exon	52094632	52094748	.	-	.	gene_id "RI:1:52091805:52092212-52094632:52094748:-"; transcript_id "RI:1:52091805:52092212-52094632:52094748:-:alternative2";
1	hq_isoforms.fasta.no5merge.collapsed.gff	exon	52091805	52094748	.	-	.	gene_id "RI:1:52091805:52092212-52094632:52094748:-"; transcript_id "RI:1:52091805:52092212-52094632:52094748:-:alternative1";
1	hq_isoforms.fasta.no5merge.collapsed.gff	exon	52313411	52313550	.	-	.	gene_id "RI:1:52313411:52313550-52315293:52315363:-"; transcript_id "RI:1:52313411:52313550-52315293:52315363:-:alternative2";
1	hq_isoforms.fasta.no5merge.collapsed.gff	exon	52315293	52315363	.	-	.	gene_id "RI:1:52313411:52313550-52315293:52315363:-"; transcript_id "RI:1:52313411:52313550-52315293:52315363:-:alternative2";
1	hq_isoforms.fasta.no5merge.collapsed.gff	exon	52313411	52315363	.	-	.	gene_id "RI:1:52313411:52313550-52315293:52315363:-"; transcript_id "RI:1:52313411:52313550-52315293:52315363:-:alternative1";
1	hq_isoforms.fasta.no5merge.collapsed.gff	exon	52318851	52318997	.	-	.	gene_id "RI:1:52318851:52318997-52321033:52321209:-"; transcript_id "RI:1:52318851:52318997-52321033:52321209:-:alternative2";
1	hq_isoforms.fasta.no5merge.collapsed.gff	exon	52321033	52321209	.	-	.	gene_id "RI:1:52318851:52318997-52321033:52321209:-"; transcript_id "RI:1:52318851:52318997-52321033:52321209:-:alternative2";
1	hq_isoforms.fasta.no5merge.collapsed.gff	exon	52318851	52321209	.	-	.	gene_id "RI:1:52318851:52318997-52321033:52321209:-"; transcript_id "RI:1:52318851:52318997-52321033:52321209:-:alternative1";
1	hq_isoforms.fasta.no5merge.collapsed.gff	exon	52322145	52322240	.	-	.	gene_id "RI:1:52322145:52322240-52322790:52322921:-"; transcript_id "RI:1:52322145:52322240-52322790:52322921:-:alternative2";
1	hq_isoforms.fasta.no5merge.collapsed.gff	exon	52322790	52322921	.	-	.	gene_id "RI:1:52322145:52322240-52322790:52322921:-"; transcript_id "RI:1:52322145:52322240-52322790:52322921:-:alternative2";
1	hq_isoforms.fasta.no5merge.collapsed.gff	exon	52322145	52322921	.	-	.	gene_id "RI:1:52322145:52322240-52322790:52322921:-"; transcript_id "RI:1:52322145:52322240-52322790:52322921:-:alternative1";
1	hq_isoforms.fasta.no5merge.collapsed.gff	exon	52905388	52905610	.	-	.	gene_id "RI:1:52905388:52905610-52906003:52906147:-"; transcript_id "RI:1:52905388:52905610-52906003:52906147:-:alternative2";
1	hq_isoforms.fasta.no5merge.collapsed.gff	exon	52906003	52906147	.	-	.	gene_id "RI:1:52905388:52905610-52906003:52906147:-"; transcript_id "RI:1:52905388:52905610-52906003:52906147:-:alternative2";
1	hq_isoforms.fasta.no5merge.collapsed.gff	exon	52905388	52906147	.	-	.	gene_id "RI:1:52905388:52905610-52906003:52906147:-"; transcript_id "RI:1:52905388:52905610-52906003:52906147:-:alternative1";
1	hq_isoforms.fasta.no5merge.collapsed.gff	exon	52906250	52906361	.	-	.	gene_id "RI:1:52906250:52906361-52908767:52908880:-"; transcript_id "RI:1:52906250:52906361-52908767:52908880:-:alternative2";
1	hq_isoforms.fasta.no5merge.collapsed.gff	exon	52908767	52908880	.	-	.	gene_id "RI:1:52906250:52906361-52908767:52908880:-"; transcript_id "RI:1:52906250:52906361-52908767:52908880:-:alternative2";
1	hq_isoforms.fasta.no5merge.collapsed.gff	exon	52906250	52908880	.	-	.	gene_id "RI:1:52906250:52906361-52908767:52908880:-"; transcript_id "RI:1:52906250:52906361-52908767:52908880:-:alternative1";
1	hq_isoforms.fasta.no5merge.collapsed.gff	exon	53098772	53098781	.	-	.	gene_id "RI:1:53098772:53098781-53098787:53098797:-"; transcript_id "RI:1:53098772:53098781-53098787:53098797:-:alternative2";
1	hq_isoforms.fasta.no5merge.collapsed.gff	exon	53098787	53098797	.	-	.	gene_id "RI:1:53098772:53098781-53098787:53098797:-"; transcript_id "RI:1:53098772:53098781-53098787:53098797:-:alternative2";
1	hq_isoforms.fasta.no5merge.collapsed.gff	exon	53098772	53098797	.	-	.	gene_id "RI:1:53098772:53098781-53098787:53098797:-"; transcript_id "RI:1:53098772:53098781-53098787:53098797:-:alternative1";
1	hq_isoforms.fasta.no5merge.collapsed.gff	exon	53189463	53189474	.	-	.	gene_id "RI:1:53189463:53189474-53189518:53189525:-"; transcript_id "RI:1:53189463:53189474-53189518:53189525:-:alternative2";
1	hq_isoforms.fasta.no5merge.collapsed.gff	exon	53189518	53189525	.	-	.	gene_id "RI:1:53189463:53189474-53189518:53189525:-"; transcript_id "RI:1:53189463:53189474-53189518:53189525:-:alternative2";
1	hq_isoforms.fasta.no5merge.collapsed.gff	exon	53189463	53189525	.	-	.	gene_id "RI:1:53189463:53189474-53189518:53189525:-"; transcript_id "RI:1:53189463:53189474-53189518:53189525:-:alternative1";
1	hq_isoforms.fasta.no5merge.collapsed.gff	exon	53428379	53428483	.	-	.	gene_id "RI:1:53428379:53428483-53428614:53428773:-"; transcript_id "RI:1:53428379:53428483-53428614:53428773:-:alternative2";
1	hq_isoforms.fasta.no5merge.collapsed.gff	exon	53428614	53428773	.	-	.	gene_id "RI:1:53428379:53428483-53428614:53428773:-"; transcript_id "RI:1:53428379:53428483-53428614:53428773:-:alternative2";
1	hq_isoforms.fasta.no5merge.collapsed.gff	exon	53428379	53428773	.	-	.	gene_id "RI:1:53428379:53428483-53428614:53428773:-"; transcript_id "RI:1:53428379:53428483-53428614:53428773:-:alternative1";
1	hq_isoforms.fasta.no5merge.collapsed.gff	exon	53327391	53327462	.	-	.	gene_id "RI:1:53327391:53327462-53327837:53327935:-"; transcript_id "RI:1:53327391:53327462-53327837:53327935:-:alternative2";
1	hq_isoforms.fasta.no5merge.collapsed.gff	exon	53327837	53327935	.	-	.	gene_id "RI:1:53327391:53327462-53327837:53327935:-"; transcript_id "RI:1:53327391:53327462-53327837:53327935:-:alternative2";
1	hq_isoforms.fasta.no5merge.collapsed.gff	exon	53327391	53327935	.	-	.	gene_id "RI:1:53327391:53327462-53327837:53327935:-"; transcript_id "RI:1:53327391:53327462-53327837:53327935:-:alternative1";
1	hq_isoforms.fasta.no5merge.collapsed.gff	exon	53326966	53327013	.	-	.	gene_id "RI:1:53326966:53327013-53327391:53327935:-"; transcript_id "RI:1:53326966:53327013-53327391:53327935:-:alternative2";
1	hq_isoforms.fasta.no5merge.collapsed.gff	exon	53327391	53327935	.	-	.	gene_id "RI:1:53326966:53327013-53327391:53327935:-"; transcript_id "RI:1:53326966:53327013-53327391:53327935:-:alternative2";
1	hq_isoforms.fasta.no5merge.collapsed.gff	exon	53326966	53327935	.	-	.	gene_id "RI:1:53326966:53327013-53327391:53327935:-"; transcript_id "RI:1:53326966:53327013-53327391:53327935:-:alternative1";
1	hq_isoforms.fasta.no5merge.collapsed.gff	exon	53482421	53483120	.	-	.	gene_id "RI:1:53482421:53483120-53483349:53483756:-"; transcript_id "RI:1:53482421:53483120-53483349:53483756:-:alternative2";
1	hq_isoforms.fasta.no5merge.collapsed.gff	exon	53483349	53483756	.	-	.	gene_id "RI:1:53482421:53483120-53483349:53483756:-"; transcript_id "RI:1:53482421:53483120-53483349:53483756:-:alternative2";
1	hq_isoforms.fasta.no5merge.collapsed.gff	exon	53482421	53483756	.	-	.	gene_id "RI:1:53482421:53483120-53483349:53483756:-"; transcript_id "RI:1:53482421:53483120-53483349:53483756:-:alternative1";
1	hq_isoforms.fasta.no5merge.collapsed.gff	exon	53765610	53765701	.	-	.	gene_id "RI:1:53765610:53765701-53767471:53767579:-"; transcript_id "RI:1:53765610:53765701-53767471:53767579:-:alternative2";
1	hq_isoforms.fasta.no5merge.collapsed.gff	exon	53767471	53767579	.	-	.	gene_id "RI:1:53765610:53765701-53767471:53767579:-"; transcript_id "RI:1:53765610:53765701-53767471:53767579:-:alternative2";
1	hq_isoforms.fasta.no5merge.collapsed.gff	exon	53765610	53767579	.	-	.	gene_id "RI:1:53765610:53765701-53767471:53767579:-"; transcript_id "RI:1:53765610:53765701-53767471:53767579:-:alternative1";
1	hq_isoforms.fasta.no5merge.collapsed.gff	exon	54357592	54358984	.	-	.	gene_id "RI:1:54357592:54358984-54359078:54359114:-"; transcript_id "RI:1:54357592:54358984-54359078:54359114:-:alternative2";
1	hq_isoforms.fasta.no5merge.collapsed.gff	exon	54359078	54359114	.	-	.	gene_id "RI:1:54357592:54358984-54359078:54359114:-"; transcript_id "RI:1:54357592:54358984-54359078:54359114:-:alternative2";
1	hq_isoforms.fasta.no5merge.collapsed.gff	exon	54357592	54359114	.	-	.	gene_id "RI:1:54357592:54358984-54359078:54359114:-"; transcript_id "RI:1:54357592:54358984-54359078:54359114:-:alternative1";
1	hq_isoforms.fasta.no5merge.collapsed.gff	exon	54359078	54359114	.	-	.	gene_id "RI:1:54359078:54359114-54359457:54359516:-"; transcript_id "RI:1:54359078:54359114-54359457:54359516:-:alternative2";
1	hq_isoforms.fasta.no5merge.collapsed.gff	exon	54359457	54359516	.	-	.	gene_id "RI:1:54359078:54359114-54359457:54359516:-"; transcript_id "RI:1:54359078:54359114-54359457:54359516:-:alternative2";
1	hq_isoforms.fasta.no5merge.collapsed.gff	exon	54359078	54359516	.	-	.	gene_id "RI:1:54359078:54359114-54359457:54359516:-"; transcript_id "RI:1:54359078:54359114-54359457:54359516:-:alternative1";
1	hq_isoforms.fasta.no5merge.collapsed.gff	exon	54385082	54385146	.	-	.	gene_id "RI:1:54385082:54385146-54385691:54385772:-"; transcript_id "RI:1:54385082:54385146-54385691:54385772:-:alternative2";
1	hq_isoforms.fasta.no5merge.collapsed.gff	exon	54385691	54385772	.	-	.	gene_id "RI:1:54385082:54385146-54385691:54385772:-"; transcript_id "RI:1:54385082:54385146-54385691:54385772:-:alternative2";
1	hq_isoforms.fasta.no5merge.collapsed.gff	exon	54385082	54385772	.	-	.	gene_id "RI:1:54385082:54385146-54385691:54385772:-"; transcript_id "RI:1:54385082:54385146-54385691:54385772:-:alternative1";
1	hq_isoforms.fasta.no5merge.collapsed.gff	exon	54389177	54389252	.	-	.	gene_id "RI:1:54389177:54389252-54390588:54390694:-"; transcript_id "RI:1:54389177:54389252-54390588:54390694:-:alternative2";
1	hq_isoforms.fasta.no5merge.collapsed.gff	exon	54390588	54390694	.	-	.	gene_id "RI:1:54389177:54389252-54390588:54390694:-"; transcript_id "RI:1:54389177:54389252-54390588:54390694:-:alternative2";
1	hq_isoforms.fasta.no5merge.collapsed.gff	exon	54389177	54390694	.	-	.	gene_id "RI:1:54389177:54389252-54390588:54390694:-"; transcript_id "RI:1:54389177:54389252-54390588:54390694:-:alternative1";
1	hq_isoforms.fasta.no5merge.collapsed.gff	exon	55564472	55564568	.	-	.	gene_id "RI:1:55564472:55564568-55566435:55566520:-"; transcript_id "RI:1:55564472:55564568-55566435:55566520:-:alternative2";
1	hq_isoforms.fasta.no5merge.collapsed.gff	exon	55566435	55566520	.	-	.	gene_id "RI:1:55564472:55564568-55566435:55566520:-"; transcript_id "RI:1:55564472:55564568-55566435:55566520:-:alternative2";
1	hq_isoforms.fasta.no5merge.collapsed.gff	exon	55564472	55566520	.	-	.	gene_id "RI:1:55564472:55564568-55566435:55566520:-"; transcript_id "RI:1:55564472:55564568-55566435:55566520:-:alternative1";
1	hq_isoforms.fasta.no5merge.collapsed.gff	exon	55808335	55808475	.	-	.	gene_id "RI:1:55808335:55808475-55809072:55809160:-"; transcript_id "RI:1:55808335:55808475-55809072:55809160:-:alternative2";
1	hq_isoforms.fasta.no5merge.collapsed.gff	exon	55809072	55809160	.	-	.	gene_id "RI:1:55808335:55808475-55809072:55809160:-"; transcript_id "RI:1:55808335:55808475-55809072:55809160:-:alternative2";
1	hq_isoforms.fasta.no5merge.collapsed.gff	exon	55808335	55809160	.	-	.	gene_id "RI:1:55808335:55808475-55809072:55809160:-"; transcript_id "RI:1:55808335:55808475-55809072:55809160:-:alternative1";
1	hq_isoforms.fasta.no5merge.collapsed.gff	exon	55811915	55812057	.	-	.	gene_id "RI:1:55811915:55812057-55815599:55815707:-"; transcript_id "RI:1:55811915:55812057-55815599:55815707:-:alternative2";
1	hq_isoforms.fasta.no5merge.collapsed.gff	exon	55815599	55815707	.	-	.	gene_id "RI:1:55811915:55812057-55815599:55815707:-"; transcript_id "RI:1:55811915:55812057-55815599:55815707:-:alternative2";
1	hq_isoforms.fasta.no5merge.collapsed.gff	exon	55811915	55815707	.	-	.	gene_id "RI:1:55811915:55812057-55815599:55815707:-"; transcript_id "RI:1:55811915:55812057-55815599:55815707:-:alternative1";
1	hq_isoforms.fasta.no5merge.collapsed.gff	exon	55977016	55977179	.	-	.	gene_id "RI:1:55977016:55977179-55979230:55979307:-"; transcript_id "RI:1:55977016:55977179-55979230:55979307:-:alternative2";
1	hq_isoforms.fasta.no5merge.collapsed.gff	exon	55979230	55979307	.	-	.	gene_id "RI:1:55977016:55977179-55979230:55979307:-"; transcript_id "RI:1:55977016:55977179-55979230:55979307:-:alternative2";
1	hq_isoforms.fasta.no5merge.collapsed.gff	exon	55977016	55979307	.	-	.	gene_id "RI:1:55977016:55977179-55979230:55979307:-"; transcript_id "RI:1:55977016:55977179-55979230:55979307:-:alternative1";
1	hq_isoforms.fasta.no5merge.collapsed.gff	exon	56051888	56052054	.	-	.	gene_id "RI:1:56051888:56052054-56052945:56053048:-"; transcript_id "RI:1:56051888:56052054-56052945:56053048:-:alternative2";
1	hq_isoforms.fasta.no5merge.collapsed.gff	exon	56052945	56053048	.	-	.	gene_id "RI:1:56051888:56052054-56052945:56053048:-"; transcript_id "RI:1:56051888:56052054-56052945:56053048:-:alternative2";
1	hq_isoforms.fasta.no5merge.collapsed.gff	exon	56051888	56053048	.	-	.	gene_id "RI:1:56051888:56052054-56052945:56053048:-"; transcript_id "RI:1:56051888:56052054-56052945:56053048:-:alternative1";
1	hq_isoforms.fasta.no5merge.collapsed.gff	exon	56138740	56138909	.	-	.	gene_id "RI:1:56138740:56138909-56140025:56140064:-"; transcript_id "RI:1:56138740:56138909-56140025:56140064:-:alternative2";
1	hq_isoforms.fasta.no5merge.collapsed.gff	exon	56140025	56140064	.	-	.	gene_id "RI:1:56138740:56138909-56140025:56140064:-"; transcript_id "RI:1:56138740:56138909-56140025:56140064:-:alternative2";
1	hq_isoforms.fasta.no5merge.collapsed.gff	exon	56138740	56140064	.	-	.	gene_id "RI:1:56138740:56138909-56140025:56140064:-"; transcript_id "RI:1:56138740:56138909-56140025:56140064:-:alternative1";
1	hq_isoforms.fasta.no5merge.collapsed.gff	exon	57758706	57760218	.	-	.	gene_id "RI:1:57758706:57760218-57761494:57762639:-"; transcript_id "RI:1:57758706:57760218-57761494:57762639:-:alternative2";
1	hq_isoforms.fasta.no5merge.collapsed.gff	exon	57761494	57762639	.	-	.	gene_id "RI:1:57758706:57760218-57761494:57762639:-"; transcript_id "RI:1:57758706:57760218-57761494:57762639:-:alternative2";
1	hq_isoforms.fasta.no5merge.collapsed.gff	exon	57758706	57762639	.	-	.	gene_id "RI:1:57758706:57760218-57761494:57762639:-"; transcript_id "RI:1:57758706:57760218-57761494:57762639:-:alternative1";
1	hq_isoforms.fasta.no5merge.collapsed.gff	exon	57929697	57929730	.	-	.	gene_id "RI:1:57929697:57929730-57929948:57930028:-"; transcript_id "RI:1:57929697:57929730-57929948:57930028:-:alternative2";
1	hq_isoforms.fasta.no5merge.collapsed.gff	exon	57929948	57930028	.	-	.	gene_id "RI:1:57929697:57929730-57929948:57930028:-"; transcript_id "RI:1:57929697:57929730-57929948:57930028:-:alternative2";
1	hq_isoforms.fasta.no5merge.collapsed.gff	exon	57929697	57930028	.	-	.	gene_id "RI:1:57929697:57929730-57929948:57930028:-"; transcript_id "RI:1:57929697:57929730-57929948:57930028:-:alternative1";
1	hq_isoforms.fasta.no5merge.collapsed.gff	exon	57929697	57929944	.	-	.	gene_id "RI:1:57929697:57929944-57929948:57930028:-"; transcript_id "RI:1:57929697:57929944-57929948:57930028:-:alternative2";
1	hq_isoforms.fasta.no5merge.collapsed.gff	exon	57929948	57930028	.	-	.	gene_id "RI:1:57929697:57929944-57929948:57930028:-"; transcript_id "RI:1:57929697:57929944-57929948:57930028:-:alternative2";
1	hq_isoforms.fasta.no5merge.collapsed.gff	exon	57929697	57930028	.	-	.	gene_id "RI:1:57929697:57929944-57929948:57930028:-"; transcript_id "RI:1:57929697:57929944-57929948:57930028:-:alternative1";
1	hq_isoforms.fasta.no5merge.collapsed.gff	exon	57916668	57916676	.	-	.	gene_id "RI:1:57916668:57916676-57916827:57916827:-"; transcript_id "RI:1:57916668:57916676-57916827:57916827:-:alternative2";
1	hq_isoforms.fasta.no5merge.collapsed.gff	exon	57916827	57916827	.	-	.	gene_id "RI:1:57916668:57916676-57916827:57916827:-"; transcript_id "RI:1:57916668:57916676-57916827:57916827:-:alternative2";
1	hq_isoforms.fasta.no5merge.collapsed.gff	exon	57916668	57916827	.	-	.	gene_id "RI:1:57916668:57916676-57916827:57916827:-"; transcript_id "RI:1:57916668:57916676-57916827:57916827:-:alternative1";
1	hq_isoforms.fasta.no5merge.collapsed.gff	exon	59037038	59037162	.	-	.	gene_id "RI:1:59037038:59037162-59038570:59038779:-"; transcript_id "RI:1:59037038:59037162-59038570:59038779:-:alternative2";
1	hq_isoforms.fasta.no5merge.collapsed.gff	exon	59038570	59038779	.	-	.	gene_id "RI:1:59037038:59037162-59038570:59038779:-"; transcript_id "RI:1:59037038:59037162-59038570:59038779:-:alternative2";
1	hq_isoforms.fasta.no5merge.collapsed.gff	exon	59037038	59038779	.	-	.	gene_id "RI:1:59037038:59037162-59038570:59038779:-"; transcript_id "RI:1:59037038:59037162-59038570:59038779:-:alternative1";
1	hq_isoforms.fasta.no5merge.collapsed.gff	exon	59116497	59116678	.	-	.	gene_id "RI:1:59116497:59116678-59117746:59117830:-"; transcript_id "RI:1:59116497:59116678-59117746:59117830:-:alternative2";
1	hq_isoforms.fasta.no5merge.collapsed.gff	exon	59117746	59117830	.	-	.	gene_id "RI:1:59116497:59116678-59117746:59117830:-"; transcript_id "RI:1:59116497:59116678-59117746:59117830:-:alternative2";
1	hq_isoforms.fasta.no5merge.collapsed.gff	exon	59116497	59117830	.	-	.	gene_id "RI:1:59116497:59116678-59117746:59117830:-"; transcript_id "RI:1:59116497:59116678-59117746:59117830:-:alternative1";
1	hq_isoforms.fasta.no5merge.collapsed.gff	exon	59136421	59136531	.	-	.	gene_id "RI:1:59136421:59136531-59137207:59137421:-"; transcript_id "RI:1:59136421:59136531-59137207:59137421:-:alternative2";
1	hq_isoforms.fasta.no5merge.collapsed.gff	exon	59137207	59137421	.	-	.	gene_id "RI:1:59136421:59136531-59137207:59137421:-"; transcript_id "RI:1:59136421:59136531-59137207:59137421:-:alternative2";
1	hq_isoforms.fasta.no5merge.collapsed.gff	exon	59136421	59137421	.	-	.	gene_id "RI:1:59136421:59136531-59137207:59137421:-"; transcript_id "RI:1:59136421:59136531-59137207:59137421:-:alternative1";
1	hq_isoforms.fasta.no5merge.collapsed.gff	exon	59153712	59153770	.	-	.	gene_id "RI:1:59153712:59153770-59153885:59153922:-"; transcript_id "RI:1:59153712:59153770-59153885:59153922:-:alternative2";
1	hq_isoforms.fasta.no5merge.collapsed.gff	exon	59153885	59153922	.	-	.	gene_id "RI:1:59153712:59153770-59153885:59153922:-"; transcript_id "RI:1:59153712:59153770-59153885:59153922:-:alternative2";
1	hq_isoforms.fasta.no5merge.collapsed.gff	exon	59153712	59153922	.	-	.	gene_id "RI:1:59153712:59153770-59153885:59153922:-"; transcript_id "RI:1:59153712:59153770-59153885:59153922:-:alternative1";
1	hq_isoforms.fasta.no5merge.collapsed.gff	exon	59135630	59136531	.	-	.	gene_id "RI:1:59135630:59136531-59137207:59138204:-"; transcript_id "RI:1:59135630:59136531-59137207:59138204:-:alternative2";
1	hq_isoforms.fasta.no5merge.collapsed.gff	exon	59137207	59138204	.	-	.	gene_id "RI:1:59135630:59136531-59137207:59138204:-"; transcript_id "RI:1:59135630:59136531-59137207:59138204:-:alternative2";
1	hq_isoforms.fasta.no5merge.collapsed.gff	exon	59135630	59138204	.	-	.	gene_id "RI:1:59135630:59136531-59137207:59138204:-"; transcript_id "RI:1:59135630:59136531-59137207:59138204:-:alternative1";
1	hq_isoforms.fasta.no5merge.collapsed.gff	exon	59153712	59153772	.	-	.	gene_id "RI:1:59153712:59153772-59153879:59153920:-"; transcript_id "RI:1:59153712:59153772-59153879:59153920:-:alternative2";
1	hq_isoforms.fasta.no5merge.collapsed.gff	exon	59153879	59153920	.	-	.	gene_id "RI:1:59153712:59153772-59153879:59153920:-"; transcript_id "RI:1:59153712:59153772-59153879:59153920:-:alternative2";
1	hq_isoforms.fasta.no5merge.collapsed.gff	exon	59153712	59153920	.	-	.	gene_id "RI:1:59153712:59153772-59153879:59153920:-"; transcript_id "RI:1:59153712:59153772-59153879:59153920:-:alternative1";
1	hq_isoforms.fasta.no5merge.collapsed.gff	exon	59137207	59137421	.	-	.	gene_id "RI:1:59137207:59137421-59137906:59138204:-"; transcript_id "RI:1:59137207:59137421-59137906:59138204:-:alternative2";
1	hq_isoforms.fasta.no5merge.collapsed.gff	exon	59137906	59138204	.	-	.	gene_id "RI:1:59137207:59137421-59137906:59138204:-"; transcript_id "RI:1:59137207:59137421-59137906:59138204:-:alternative2";
1	hq_isoforms.fasta.no5merge.collapsed.gff	exon	59137207	59138204	.	-	.	gene_id "RI:1:59137207:59137421-59137906:59138204:-"; transcript_id "RI:1:59137207:59137421-59137906:59138204:-:alternative1";
1	hq_isoforms.fasta.no5merge.collapsed.gff	exon	59631202	59632341	.	-	.	gene_id "RI:1:59631202:59632341-59632468:59633604:-"; transcript_id "RI:1:59631202:59632341-59632468:59633604:-:alternative2";
1	hq_isoforms.fasta.no5merge.collapsed.gff	exon	59632468	59633604	.	-	.	gene_id "RI:1:59631202:59632341-59632468:59633604:-"; transcript_id "RI:1:59631202:59632341-59632468:59633604:-:alternative2";
1	hq_isoforms.fasta.no5merge.collapsed.gff	exon	59631202	59633604	.	-	.	gene_id "RI:1:59631202:59632341-59632468:59633604:-"; transcript_id "RI:1:59631202:59632341-59632468:59633604:-:alternative1";
1	hq_isoforms.fasta.no5merge.collapsed.gff	exon	61248761	61249196	.	-	.	gene_id "RI:1:61248761:61249196-61249201:61249295:-"; transcript_id "RI:1:61248761:61249196-61249201:61249295:-:alternative2";
1	hq_isoforms.fasta.no5merge.collapsed.gff	exon	61249201	61249295	.	-	.	gene_id "RI:1:61248761:61249196-61249201:61249295:-"; transcript_id "RI:1:61248761:61249196-61249201:61249295:-:alternative2";
1	hq_isoforms.fasta.no5merge.collapsed.gff	exon	61248761	61249295	.	-	.	gene_id "RI:1:61248761:61249196-61249201:61249295:-"; transcript_id "RI:1:61248761:61249196-61249201:61249295:-:alternative1";
1	hq_isoforms.fasta.no5merge.collapsed.gff	exon	61318311	61318478	.	-	.	gene_id "RI:1:61318311:61318478-61320856:61320933:-"; transcript_id "RI:1:61318311:61318478-61320856:61320933:-:alternative2";
1	hq_isoforms.fasta.no5merge.collapsed.gff	exon	61320856	61320933	.	-	.	gene_id "RI:1:61318311:61318478-61320856:61320933:-"; transcript_id "RI:1:61318311:61318478-61320856:61320933:-:alternative2";
1	hq_isoforms.fasta.no5merge.collapsed.gff	exon	61318311	61320933	.	-	.	gene_id "RI:1:61318311:61318478-61320856:61320933:-"; transcript_id "RI:1:61318311:61318478-61320856:61320933:-:alternative1";
1	hq_isoforms.fasta.no5merge.collapsed.gff	exon	61409091	61409231	.	-	.	gene_id "RI:1:61409091:61409231-61409996:61410136:-"; transcript_id "RI:1:61409091:61409231-61409996:61410136:-:alternative2";
1	hq_isoforms.fasta.no5merge.collapsed.gff	exon	61409996	61410136	.	-	.	gene_id "RI:1:61409091:61409231-61409996:61410136:-"; transcript_id "RI:1:61409091:61409231-61409996:61410136:-:alternative2";
1	hq_isoforms.fasta.no5merge.collapsed.gff	exon	61409091	61410136	.	-	.	gene_id "RI:1:61409091:61409231-61409996:61410136:-"; transcript_id "RI:1:61409091:61409231-61409996:61410136:-:alternative1";
1	hq_isoforms.fasta.no5merge.collapsed.gff	exon	61748196	61748639	.	-	.	gene_id "RI:1:61748196:61748639-61748990:61749064:-"; transcript_id "RI:1:61748196:61748639-61748990:61749064:-:alternative2";
1	hq_isoforms.fasta.no5merge.collapsed.gff	exon	61748990	61749064	.	-	.	gene_id "RI:1:61748196:61748639-61748990:61749064:-"; transcript_id "RI:1:61748196:61748639-61748990:61749064:-:alternative2";
1	hq_isoforms.fasta.no5merge.collapsed.gff	exon	61748196	61749064	.	-	.	gene_id "RI:1:61748196:61748639-61748990:61749064:-"; transcript_id "RI:1:61748196:61748639-61748990:61749064:-:alternative1";
1	hq_isoforms.fasta.no5merge.collapsed.gff	exon	63867443	63867449	.	-	.	gene_id "RI:1:63867443:63867449-63867466:63867466:-"; transcript_id "RI:1:63867443:63867449-63867466:63867466:-:alternative2";
1	hq_isoforms.fasta.no5merge.collapsed.gff	exon	63867466	63867466	.	-	.	gene_id "RI:1:63867443:63867449-63867466:63867466:-"; transcript_id "RI:1:63867443:63867449-63867466:63867466:-:alternative2";
1	hq_isoforms.fasta.no5merge.collapsed.gff	exon	63867443	63867466	.	-	.	gene_id "RI:1:63867443:63867449-63867466:63867466:-"; transcript_id "RI:1:63867443:63867449-63867466:63867466:-:alternative1";
1	hq_isoforms.fasta.no5merge.collapsed.gff	exon	64097991	64098067	.	-	.	gene_id "RI:1:64097991:64098067-64098504:64098580:-"; transcript_id "RI:1:64097991:64098067-64098504:64098580:-:alternative2";
1	hq_isoforms.fasta.no5merge.collapsed.gff	exon	64098504	64098580	.	-	.	gene_id "RI:1:64097991:64098067-64098504:64098580:-"; transcript_id "RI:1:64097991:64098067-64098504:64098580:-:alternative2";
1	hq_isoforms.fasta.no5merge.collapsed.gff	exon	64097991	64098580	.	-	.	gene_id "RI:1:64097991:64098067-64098504:64098580:-"; transcript_id "RI:1:64097991:64098067-64098504:64098580:-:alternative1";
1	hq_isoforms.fasta.no5merge.collapsed.gff	exon	64097991	64098580	.	-	.	gene_id "RI:1:64097991:64098580-64098666:64100391:-"; transcript_id "RI:1:64097991:64098580-64098666:64100391:-:alternative2";
1	hq_isoforms.fasta.no5merge.collapsed.gff	exon	64098666	64100391	.	-	.	gene_id "RI:1:64097991:64098580-64098666:64100391:-"; transcript_id "RI:1:64097991:64098580-64098666:64100391:-:alternative2";
1	hq_isoforms.fasta.no5merge.collapsed.gff	exon	64097991	64100391	.	-	.	gene_id "RI:1:64097991:64098580-64098666:64100391:-"; transcript_id "RI:1:64097991:64098580-64098666:64100391:-:alternative1";
1	hq_isoforms.fasta.no5merge.collapsed.gff	exon	64270364	64270453	.	-	.	gene_id "RI:1:64270364:64270453-64272267:64272333:-"; transcript_id "RI:1:64270364:64270453-64272267:64272333:-:alternative2";
1	hq_isoforms.fasta.no5merge.collapsed.gff	exon	64272267	64272333	.	-	.	gene_id "RI:1:64270364:64270453-64272267:64272333:-"; transcript_id "RI:1:64270364:64270453-64272267:64272333:-:alternative2";
1	hq_isoforms.fasta.no5merge.collapsed.gff	exon	64270364	64272333	.	-	.	gene_id "RI:1:64270364:64270453-64272267:64272333:-"; transcript_id "RI:1:64270364:64270453-64272267:64272333:-:alternative1";
1	hq_isoforms.fasta.no5merge.collapsed.gff	exon	64318393	64318596	.	-	.	gene_id "RI:1:64318393:64318596-64320133:64320278:-"; transcript_id "RI:1:64318393:64318596-64320133:64320278:-:alternative2";
1	hq_isoforms.fasta.no5merge.collapsed.gff	exon	64320133	64320278	.	-	.	gene_id "RI:1:64318393:64318596-64320133:64320278:-"; transcript_id "RI:1:64318393:64318596-64320133:64320278:-:alternative2";
1	hq_isoforms.fasta.no5merge.collapsed.gff	exon	64318393	64320278	.	-	.	gene_id "RI:1:64318393:64318596-64320133:64320278:-"; transcript_id "RI:1:64318393:64318596-64320133:64320278:-:alternative1";
1	hq_isoforms.fasta.no5merge.collapsed.gff	exon	65395260	65395371	.	-	.	gene_id "RI:1:65395260:65395371-65399190:65399323:-"; transcript_id "RI:1:65395260:65395371-65399190:65399323:-:alternative2";
1	hq_isoforms.fasta.no5merge.collapsed.gff	exon	65399190	65399323	.	-	.	gene_id "RI:1:65395260:65395371-65399190:65399323:-"; transcript_id "RI:1:65395260:65395371-65399190:65399323:-:alternative2";
1	hq_isoforms.fasta.no5merge.collapsed.gff	exon	65395260	65399323	.	-	.	gene_id "RI:1:65395260:65395371-65399190:65399323:-"; transcript_id "RI:1:65395260:65395371-65399190:65399323:-:alternative1";
1	hq_isoforms.fasta.no5merge.collapsed.gff	exon	65395260	65395371	.	-	.	gene_id "RI:1:65395260:65395371-65399289:65399323:-"; transcript_id "RI:1:65395260:65395371-65399289:65399323:-:alternative2";
1	hq_isoforms.fasta.no5merge.collapsed.gff	exon	65399289	65399323	.	-	.	gene_id "RI:1:65395260:65395371-65399289:65399323:-"; transcript_id "RI:1:65395260:65395371-65399289:65399323:-:alternative2";
1	hq_isoforms.fasta.no5merge.collapsed.gff	exon	65395260	65399323	.	-	.	gene_id "RI:1:65395260:65395371-65399289:65399323:-"; transcript_id "RI:1:65395260:65395371-65399289:65399323:-:alternative1";
1	hq_isoforms.fasta.no5merge.collapsed.gff	exon	65549413	65549564	.	-	.	gene_id "RI:1:65549413:65549564-65550109:65551058:-"; transcript_id "RI:1:65549413:65549564-65550109:65551058:-:alternative2";
1	hq_isoforms.fasta.no5merge.collapsed.gff	exon	65550109	65551058	.	-	.	gene_id "RI:1:65549413:65549564-65550109:65551058:-"; transcript_id "RI:1:65549413:65549564-65550109:65551058:-:alternative2";
1	hq_isoforms.fasta.no5merge.collapsed.gff	exon	65549413	65551058	.	-	.	gene_id "RI:1:65549413:65549564-65550109:65551058:-"; transcript_id "RI:1:65549413:65549564-65550109:65551058:-:alternative1";
1	hq_isoforms.fasta.no5merge.collapsed.gff	exon	66385609	66385682	.	-	.	gene_id "RI:1:66385609:66385682-66387791:66387991:-"; transcript_id "RI:1:66385609:66385682-66387791:66387991:-:alternative2";
1	hq_isoforms.fasta.no5merge.collapsed.gff	exon	66387791	66387991	.	-	.	gene_id "RI:1:66385609:66385682-66387791:66387991:-"; transcript_id "RI:1:66385609:66385682-66387791:66387991:-:alternative2";
1	hq_isoforms.fasta.no5merge.collapsed.gff	exon	66385609	66387991	.	-	.	gene_id "RI:1:66385609:66385682-66387791:66387991:-"; transcript_id "RI:1:66385609:66385682-66387791:66387991:-:alternative1";
1	hq_isoforms.fasta.no5merge.collapsed.gff	exon	66387791	66387868	.	-	.	gene_id "RI:1:66387791:66387868-66387941:66387991:-"; transcript_id "RI:1:66387791:66387868-66387941:66387991:-:alternative2";
1	hq_isoforms.fasta.no5merge.collapsed.gff	exon	66387941	66387991	.	-	.	gene_id "RI:1:66387791:66387868-66387941:66387991:-"; transcript_id "RI:1:66387791:66387868-66387941:66387991:-:alternative2";
1	hq_isoforms.fasta.no5merge.collapsed.gff	exon	66387791	66387991	.	-	.	gene_id "RI:1:66387791:66387868-66387941:66387991:-"; transcript_id "RI:1:66387791:66387868-66387941:66387991:-:alternative1";
1	hq_isoforms.fasta.no5merge.collapsed.gff	exon	68277160	68277202	.	-	.	gene_id "RI:1:68277160:68277202-68281181:68281308:-"; transcript_id "RI:1:68277160:68277202-68281181:68281308:-:alternative2";
1	hq_isoforms.fasta.no5merge.collapsed.gff	exon	68281181	68281308	.	-	.	gene_id "RI:1:68277160:68277202-68281181:68281308:-"; transcript_id "RI:1:68277160:68277202-68281181:68281308:-:alternative2";
1	hq_isoforms.fasta.no5merge.collapsed.gff	exon	68277160	68281308	.	-	.	gene_id "RI:1:68277160:68277202-68281181:68281308:-"; transcript_id "RI:1:68277160:68277202-68281181:68281308:-:alternative1";
1	hq_isoforms.fasta.no5merge.collapsed.gff	exon	68536332	68536401	.	-	.	gene_id "RI:1:68536332:68536401-68537874:68537983:-"; transcript_id "RI:1:68536332:68536401-68537874:68537983:-:alternative2";
1	hq_isoforms.fasta.no5merge.collapsed.gff	exon	68537874	68537983	.	-	.	gene_id "RI:1:68536332:68536401-68537874:68537983:-"; transcript_id "RI:1:68536332:68536401-68537874:68537983:-:alternative2";
1	hq_isoforms.fasta.no5merge.collapsed.gff	exon	68536332	68537983	.	-	.	gene_id "RI:1:68536332:68536401-68537874:68537983:-"; transcript_id "RI:1:68536332:68536401-68537874:68537983:-:alternative1";
1	hq_isoforms.fasta.no5merge.collapsed.gff	exon	68639685	68640023	.	-	.	gene_id "RI:1:68639685:68640023-68642224:68644775:-"; transcript_id "RI:1:68639685:68640023-68642224:68644775:-:alternative2";
1	hq_isoforms.fasta.no5merge.collapsed.gff	exon	68642224	68644775	.	-	.	gene_id "RI:1:68639685:68640023-68642224:68644775:-"; transcript_id "RI:1:68639685:68640023-68642224:68644775:-:alternative2";
1	hq_isoforms.fasta.no5merge.collapsed.gff	exon	68639685	68644775	.	-	.	gene_id "RI:1:68639685:68640023-68642224:68644775:-"; transcript_id "RI:1:68639685:68640023-68642224:68644775:-:alternative1";
1	hq_isoforms.fasta.no5merge.collapsed.gff	exon	70932187	70932439	.	-	.	gene_id "RI:1:70932187:70932439-70933781:70933836:-"; transcript_id "RI:1:70932187:70932439-70933781:70933836:-:alternative2";
1	hq_isoforms.fasta.no5merge.collapsed.gff	exon	70933781	70933836	.	-	.	gene_id "RI:1:70932187:70932439-70933781:70933836:-"; transcript_id "RI:1:70932187:70932439-70933781:70933836:-:alternative2";
1	hq_isoforms.fasta.no5merge.collapsed.gff	exon	70932187	70933836	.	-	.	gene_id "RI:1:70932187:70932439-70933781:70933836:-"; transcript_id "RI:1:70932187:70932439-70933781:70933836:-:alternative1";
1	hq_isoforms.fasta.no5merge.collapsed.gff	exon	69266022	69267352	.	-	.	gene_id "RI:1:69266022:69267352-69267439:69270913:-"; transcript_id "RI:1:69266022:69267352-69267439:69270913:-:alternative2";
1	hq_isoforms.fasta.no5merge.collapsed.gff	exon	69267439	69270913	.	-	.	gene_id "RI:1:69266022:69267352-69267439:69270913:-"; transcript_id "RI:1:69266022:69267352-69267439:69270913:-:alternative2";
1	hq_isoforms.fasta.no5merge.collapsed.gff	exon	69266022	69270913	.	-	.	gene_id "RI:1:69266022:69267352-69267439:69270913:-"; transcript_id "RI:1:69266022:69267352-69267439:69270913:-:alternative1";
1	hq_isoforms.fasta.no5merge.collapsed.gff	exon	69869159	69869324	.	-	.	gene_id "RI:1:69869159:69869324-69871912:69872034:-"; transcript_id "RI:1:69869159:69869324-69871912:69872034:-:alternative2";
1	hq_isoforms.fasta.no5merge.collapsed.gff	exon	69871912	69872034	.	-	.	gene_id "RI:1:69869159:69869324-69871912:69872034:-"; transcript_id "RI:1:69869159:69869324-69871912:69872034:-:alternative2";
1	hq_isoforms.fasta.no5merge.collapsed.gff	exon	69869159	69872034	.	-	.	gene_id "RI:1:69869159:69869324-69871912:69872034:-"; transcript_id "RI:1:69869159:69869324-69871912:69872034:-:alternative1";
1	hq_isoforms.fasta.no5merge.collapsed.gff	exon	69872561	69872657	.	-	.	gene_id "RI:1:69872561:69872657-69873066:69873268:-"; transcript_id "RI:1:69872561:69872657-69873066:69873268:-:alternative2";
1	hq_isoforms.fasta.no5merge.collapsed.gff	exon	69873066	69873268	.	-	.	gene_id "RI:1:69872561:69872657-69873066:69873268:-"; transcript_id "RI:1:69872561:69872657-69873066:69873268:-:alternative2";
1	hq_isoforms.fasta.no5merge.collapsed.gff	exon	69872561	69873268	.	-	.	gene_id "RI:1:69872561:69872657-69873066:69873268:-"; transcript_id "RI:1:69872561:69872657-69873066:69873268:-:alternative1";
1	hq_isoforms.fasta.no5merge.collapsed.gff	exon	72347234	72347375	.	-	.	gene_id "RI:1:72347234:72347375-72348550:72348696:-"; transcript_id "RI:1:72347234:72347375-72348550:72348696:-:alternative2";
1	hq_isoforms.fasta.no5merge.collapsed.gff	exon	72348550	72348696	.	-	.	gene_id "RI:1:72347234:72347375-72348550:72348696:-"; transcript_id "RI:1:72347234:72347375-72348550:72348696:-:alternative2";
1	hq_isoforms.fasta.no5merge.collapsed.gff	exon	72347234	72348696	.	-	.	gene_id "RI:1:72347234:72347375-72348550:72348696:-"; transcript_id "RI:1:72347234:72347375-72348550:72348696:-:alternative1";
1	hq_isoforms.fasta.no5merge.collapsed.gff	exon	72349189	72350112	.	-	.	gene_id "RI:1:72349189:72350112-72351403:72351489:-"; transcript_id "RI:1:72349189:72350112-72351403:72351489:-:alternative2";
1	hq_isoforms.fasta.no5merge.collapsed.gff	exon	72351403	72351489	.	-	.	gene_id "RI:1:72349189:72350112-72351403:72351489:-"; transcript_id "RI:1:72349189:72350112-72351403:72351489:-:alternative2";
1	hq_isoforms.fasta.no5merge.collapsed.gff	exon	72349189	72351489	.	-	.	gene_id "RI:1:72349189:72350112-72351403:72351489:-"; transcript_id "RI:1:72349189:72350112-72351403:72351489:-:alternative1";
1	hq_isoforms.fasta.no5merge.collapsed.gff	exon	70881209	70881332	.	-	.	gene_id "RI:1:70881209:70881332-70881393:70881553:-"; transcript_id "RI:1:70881209:70881332-70881393:70881553:-:alternative2";
1	hq_isoforms.fasta.no5merge.collapsed.gff	exon	70881393	70881553	.	-	.	gene_id "RI:1:70881209:70881332-70881393:70881553:-"; transcript_id "RI:1:70881209:70881332-70881393:70881553:-:alternative2";
1	hq_isoforms.fasta.no5merge.collapsed.gff	exon	70881209	70881553	.	-	.	gene_id "RI:1:70881209:70881332-70881393:70881553:-"; transcript_id "RI:1:70881209:70881332-70881393:70881553:-:alternative1";
1	hq_isoforms.fasta.no5merge.collapsed.gff	exon	71276609	71277442	.	-	.	gene_id "RI:1:71276609:71277442-71277489:71279182:-"; transcript_id "RI:1:71276609:71277442-71277489:71279182:-:alternative2";
1	hq_isoforms.fasta.no5merge.collapsed.gff	exon	71277489	71279182	.	-	.	gene_id "RI:1:71276609:71277442-71277489:71279182:-"; transcript_id "RI:1:71276609:71277442-71277489:71279182:-:alternative2";
1	hq_isoforms.fasta.no5merge.collapsed.gff	exon	71276609	71279182	.	-	.	gene_id "RI:1:71276609:71277442-71277489:71279182:-"; transcript_id "RI:1:71276609:71277442-71277489:71279182:-:alternative1";
1	hq_isoforms.fasta.no5merge.collapsed.gff	exon	72348550	72348696	.	-	.	gene_id "RI:1:72348550:72348696-72349189:72349256:-"; transcript_id "RI:1:72348550:72348696-72349189:72349256:-:alternative2";
1	hq_isoforms.fasta.no5merge.collapsed.gff	exon	72349189	72349256	.	-	.	gene_id "RI:1:72348550:72348696-72349189:72349256:-"; transcript_id "RI:1:72348550:72348696-72349189:72349256:-:alternative2";
1	hq_isoforms.fasta.no5merge.collapsed.gff	exon	72348550	72349256	.	-	.	gene_id "RI:1:72348550:72348696-72349189:72349256:-"; transcript_id "RI:1:72348550:72348696-72349189:72349256:-:alternative1";
1	hq_isoforms.fasta.no5merge.collapsed.gff	exon	72223650	72223808	.	-	.	gene_id "RI:1:72223650:72223808-72224831:72225884:-"; transcript_id "RI:1:72223650:72223808-72224831:72225884:-:alternative2";
1	hq_isoforms.fasta.no5merge.collapsed.gff	exon	72224831	72225884	.	-	.	gene_id "RI:1:72223650:72223808-72224831:72225884:-"; transcript_id "RI:1:72223650:72223808-72224831:72225884:-:alternative2";
1	hq_isoforms.fasta.no5merge.collapsed.gff	exon	72223650	72225884	.	-	.	gene_id "RI:1:72223650:72223808-72224831:72225884:-"; transcript_id "RI:1:72223650:72223808-72224831:72225884:-:alternative1";
1	hq_isoforms.fasta.no5merge.collapsed.gff	exon	72237444	72237505	.	-	.	gene_id "RI:1:72237444:72237505-72237741:72239740:-"; transcript_id "RI:1:72237444:72237505-72237741:72239740:-:alternative2";
1	hq_isoforms.fasta.no5merge.collapsed.gff	exon	72237741	72239740	.	-	.	gene_id "RI:1:72237444:72237505-72237741:72239740:-"; transcript_id "RI:1:72237444:72237505-72237741:72239740:-:alternative2";
1	hq_isoforms.fasta.no5merge.collapsed.gff	exon	72237444	72239740	.	-	.	gene_id "RI:1:72237444:72237505-72237741:72239740:-"; transcript_id "RI:1:72237444:72237505-72237741:72239740:-:alternative1";
1	hq_isoforms.fasta.no5merge.collapsed.gff	exon	72242644	72242784	.	-	.	gene_id "RI:1:72242644:72242784-72243834:72243936:-"; transcript_id "RI:1:72242644:72242784-72243834:72243936:-:alternative2";
1	hq_isoforms.fasta.no5merge.collapsed.gff	exon	72243834	72243936	.	-	.	gene_id "RI:1:72242644:72242784-72243834:72243936:-"; transcript_id "RI:1:72242644:72242784-72243834:72243936:-:alternative2";
1	hq_isoforms.fasta.no5merge.collapsed.gff	exon	72242644	72243936	.	-	.	gene_id "RI:1:72242644:72242784-72243834:72243936:-"; transcript_id "RI:1:72242644:72242784-72243834:72243936:-:alternative1";
1	hq_isoforms.fasta.no5merge.collapsed.gff	exon	72352657	72352728	.	-	.	gene_id "RI:1:72352657:72352728-72353431:72353559:-"; transcript_id "RI:1:72352657:72352728-72353431:72353559:-:alternative2";
1	hq_isoforms.fasta.no5merge.collapsed.gff	exon	72353431	72353559	.	-	.	gene_id "RI:1:72352657:72352728-72353431:72353559:-"; transcript_id "RI:1:72352657:72352728-72353431:72353559:-:alternative2";
1	hq_isoforms.fasta.no5merge.collapsed.gff	exon	72352657	72353559	.	-	.	gene_id "RI:1:72352657:72352728-72353431:72353559:-"; transcript_id "RI:1:72352657:72352728-72353431:72353559:-:alternative1";
1	hq_isoforms.fasta.no5merge.collapsed.gff	exon	72349189	72349256	.	-	.	gene_id "RI:1:72349189:72349256-72350042:72350112:-"; transcript_id "RI:1:72349189:72349256-72350042:72350112:-:alternative2";
1	hq_isoforms.fasta.no5merge.collapsed.gff	exon	72350042	72350112	.	-	.	gene_id "RI:1:72349189:72349256-72350042:72350112:-"; transcript_id "RI:1:72349189:72349256-72350042:72350112:-:alternative2";
1	hq_isoforms.fasta.no5merge.collapsed.gff	exon	72349189	72350112	.	-	.	gene_id "RI:1:72349189:72349256-72350042:72350112:-"; transcript_id "RI:1:72349189:72349256-72350042:72350112:-:alternative1";
1	hq_isoforms.fasta.no5merge.collapsed.gff	exon	72348550	72349256	.	-	.	gene_id "RI:1:72348550:72349256-72350042:72351489:-"; transcript_id "RI:1:72348550:72349256-72350042:72351489:-:alternative2";
1	hq_isoforms.fasta.no5merge.collapsed.gff	exon	72350042	72351489	.	-	.	gene_id "RI:1:72348550:72349256-72350042:72351489:-"; transcript_id "RI:1:72348550:72349256-72350042:72351489:-:alternative2";
1	hq_isoforms.fasta.no5merge.collapsed.gff	exon	72348550	72351489	.	-	.	gene_id "RI:1:72348550:72349256-72350042:72351489:-"; transcript_id "RI:1:72348550:72349256-72350042:72351489:-:alternative1";
1	hq_isoforms.fasta.no5merge.collapsed.gff	exon	72348550	72348696	.	-	.	gene_id "RI:1:72348550:72348696-72349189:72351489:-"; transcript_id "RI:1:72348550:72348696-72349189:72351489:-:alternative2";
1	hq_isoforms.fasta.no5merge.collapsed.gff	exon	72349189	72351489	.	-	.	gene_id "RI:1:72348550:72348696-72349189:72351489:-"; transcript_id "RI:1:72348550:72348696-72349189:72351489:-:alternative2";
1	hq_isoforms.fasta.no5merge.collapsed.gff	exon	72348550	72351489	.	-	.	gene_id "RI:1:72348550:72348696-72349189:72351489:-"; transcript_id "RI:1:72348550:72348696-72349189:72351489:-:alternative1";
1	hq_isoforms.fasta.no5merge.collapsed.gff	exon	72350042	72350112	.	-	.	gene_id "RI:1:72350042:72350112-72351403:72351489:-"; transcript_id "RI:1:72350042:72350112-72351403:72351489:-:alternative2";
1	hq_isoforms.fasta.no5merge.collapsed.gff	exon	72351403	72351489	.	-	.	gene_id "RI:1:72350042:72350112-72351403:72351489:-"; transcript_id "RI:1:72350042:72350112-72351403:72351489:-:alternative2";
1	hq_isoforms.fasta.no5merge.collapsed.gff	exon	72350042	72351489	.	-	.	gene_id "RI:1:72350042:72350112-72351403:72351489:-"; transcript_id "RI:1:72350042:72350112-72351403:72351489:-:alternative1";
1	hq_isoforms.fasta.no5merge.collapsed.gff	exon	72351403	72351489	.	-	.	gene_id "RI:1:72351403:72351489-72352657:72353559:-"; transcript_id "RI:1:72351403:72351489-72352657:72353559:-:alternative2";
1	hq_isoforms.fasta.no5merge.collapsed.gff	exon	72352657	72353559	.	-	.	gene_id "RI:1:72351403:72351489-72352657:72353559:-"; transcript_id "RI:1:72351403:72351489-72352657:72353559:-:alternative2";
1	hq_isoforms.fasta.no5merge.collapsed.gff	exon	72351403	72353559	.	-	.	gene_id "RI:1:72351403:72351489-72352657:72353559:-"; transcript_id "RI:1:72351403:72351489-72352657:72353559:-:alternative1";
1	hq_isoforms.fasta.no5merge.collapsed.gff	exon	72347234	72348696	.	-	.	gene_id "RI:1:72347234:72348696-72349189:72349256:-"; transcript_id "RI:1:72347234:72348696-72349189:72349256:-:alternative2";
1	hq_isoforms.fasta.no5merge.collapsed.gff	exon	72349189	72349256	.	-	.	gene_id "RI:1:72347234:72348696-72349189:72349256:-"; transcript_id "RI:1:72347234:72348696-72349189:72349256:-:alternative2";
1	hq_isoforms.fasta.no5merge.collapsed.gff	exon	72347234	72349256	.	-	.	gene_id "RI:1:72347234:72348696-72349189:72349256:-"; transcript_id "RI:1:72347234:72348696-72349189:72349256:-:alternative1";
1	hq_isoforms.fasta.no5merge.collapsed.gff	exon	72347234	72347375	.	-	.	gene_id "RI:1:72347234:72347375-72348550:72349256:-"; transcript_id "RI:1:72347234:72347375-72348550:72349256:-:alternative2";
1	hq_isoforms.fasta.no5merge.collapsed.gff	exon	72348550	72349256	.	-	.	gene_id "RI:1:72347234:72347375-72348550:72349256:-"; transcript_id "RI:1:72347234:72347375-72348550:72349256:-:alternative2";
1	hq_isoforms.fasta.no5merge.collapsed.gff	exon	72347234	72349256	.	-	.	gene_id "RI:1:72347234:72347375-72348550:72349256:-"; transcript_id "RI:1:72347234:72347375-72348550:72349256:-:alternative1";
1	hq_isoforms.fasta.no5merge.collapsed.gff	exon	72347234	72347375	.	-	.	gene_id "RI:1:72347234:72347375-72348550:72351489:-"; transcript_id "RI:1:72347234:72347375-72348550:72351489:-:alternative2";
1	hq_isoforms.fasta.no5merge.collapsed.gff	exon	72348550	72351489	.	-	.	gene_id "RI:1:72347234:72347375-72348550:72351489:-"; transcript_id "RI:1:72347234:72347375-72348550:72351489:-:alternative2";
1	hq_isoforms.fasta.no5merge.collapsed.gff	exon	72347234	72351489	.	-	.	gene_id "RI:1:72347234:72347375-72348550:72351489:-"; transcript_id "RI:1:72347234:72347375-72348550:72351489:-:alternative1";
1	hq_isoforms.fasta.no5merge.collapsed.gff	exon	72347234	72348696	.	-	.	gene_id "RI:1:72347234:72348696-72349189:72351489:-"; transcript_id "RI:1:72347234:72348696-72349189:72351489:-:alternative2";
1	hq_isoforms.fasta.no5merge.collapsed.gff	exon	72349189	72351489	.	-	.	gene_id "RI:1:72347234:72348696-72349189:72351489:-"; transcript_id "RI:1:72347234:72348696-72349189:72351489:-:alternative2";
1	hq_isoforms.fasta.no5merge.collapsed.gff	exon	72347234	72351489	.	-	.	gene_id "RI:1:72347234:72348696-72349189:72351489:-"; transcript_id "RI:1:72347234:72348696-72349189:72351489:-:alternative1";
1	hq_isoforms.fasta.no5merge.collapsed.gff	exon	72374594	72375673	.	-	.	gene_id "RI:1:72374594:72375673-72375811:72376020:-"; transcript_id "RI:1:72374594:72375673-72375811:72376020:-:alternative2";
1	hq_isoforms.fasta.no5merge.collapsed.gff	exon	72375811	72376020	.	-	.	gene_id "RI:1:72374594:72375673-72375811:72376020:-"; transcript_id "RI:1:72374594:72375673-72375811:72376020:-:alternative2";
1	hq_isoforms.fasta.no5merge.collapsed.gff	exon	72374594	72376020	.	-	.	gene_id "RI:1:72374594:72375673-72375811:72376020:-"; transcript_id "RI:1:72374594:72375673-72375811:72376020:-:alternative1";
1	hq_isoforms.fasta.no5merge.collapsed.gff	exon	72374594	72374654	.	-	.	gene_id "RI:1:72374594:72374654-72375811:72376020:-"; transcript_id "RI:1:72374594:72374654-72375811:72376020:-:alternative2";
1	hq_isoforms.fasta.no5merge.collapsed.gff	exon	72375811	72376020	.	-	.	gene_id "RI:1:72374594:72374654-72375811:72376020:-"; transcript_id "RI:1:72374594:72374654-72375811:72376020:-:alternative2";
1	hq_isoforms.fasta.no5merge.collapsed.gff	exon	72374594	72376020	.	-	.	gene_id "RI:1:72374594:72374654-72375811:72376020:-"; transcript_id "RI:1:72374594:72374654-72375811:72376020:-:alternative1";
1	hq_isoforms.fasta.no5merge.collapsed.gff	exon	72370012	72370128	.	-	.	gene_id "RI:1:72370012:72370128-72370992:72371620:-"; transcript_id "RI:1:72370012:72370128-72370992:72371620:-:alternative2";
1	hq_isoforms.fasta.no5merge.collapsed.gff	exon	72370992	72371620	.	-	.	gene_id "RI:1:72370012:72370128-72370992:72371620:-"; transcript_id "RI:1:72370012:72370128-72370992:72371620:-:alternative2";
1	hq_isoforms.fasta.no5merge.collapsed.gff	exon	72370012	72371620	.	-	.	gene_id "RI:1:72370012:72370128-72370992:72371620:-"; transcript_id "RI:1:72370012:72370128-72370992:72371620:-:alternative1";
1	hq_isoforms.fasta.no5merge.collapsed.gff	exon	72379634	72379866	.	-	.	gene_id "RI:1:72379634:72379866-72383250:72383505:-"; transcript_id "RI:1:72379634:72379866-72383250:72383505:-:alternative2";
1	hq_isoforms.fasta.no5merge.collapsed.gff	exon	72383250	72383505	.	-	.	gene_id "RI:1:72379634:72379866-72383250:72383505:-"; transcript_id "RI:1:72379634:72379866-72383250:72383505:-:alternative2";
1	hq_isoforms.fasta.no5merge.collapsed.gff	exon	72379634	72383505	.	-	.	gene_id "RI:1:72379634:72379866-72383250:72383505:-"; transcript_id "RI:1:72379634:72379866-72383250:72383505:-:alternative1";
1	hq_isoforms.fasta.no5merge.collapsed.gff	exon	72370992	72371620	.	-	.	gene_id "RI:1:72370992:72371620-72372104:72372320:-"; transcript_id "RI:1:72370992:72371620-72372104:72372320:-:alternative2";
1	hq_isoforms.fasta.no5merge.collapsed.gff	exon	72372104	72372320	.	-	.	gene_id "RI:1:72370992:72371620-72372104:72372320:-"; transcript_id "RI:1:72370992:72371620-72372104:72372320:-:alternative2";
1	hq_isoforms.fasta.no5merge.collapsed.gff	exon	72370992	72372320	.	-	.	gene_id "RI:1:72370992:72371620-72372104:72372320:-"; transcript_id "RI:1:72370992:72371620-72372104:72372320:-:alternative1";
1	hq_isoforms.fasta.no5merge.collapsed.gff	exon	72370992	72371124	.	-	.	gene_id "RI:1:72370992:72371124-72372104:72372320:-"; transcript_id "RI:1:72370992:72371124-72372104:72372320:-:alternative2";
1	hq_isoforms.fasta.no5merge.collapsed.gff	exon	72372104	72372320	.	-	.	gene_id "RI:1:72370992:72371124-72372104:72372320:-"; transcript_id "RI:1:72370992:72371124-72372104:72372320:-:alternative2";
1	hq_isoforms.fasta.no5merge.collapsed.gff	exon	72370992	72372320	.	-	.	gene_id "RI:1:72370992:72371124-72372104:72372320:-"; transcript_id "RI:1:72370992:72371124-72372104:72372320:-:alternative1";
1	hq_isoforms.fasta.no5merge.collapsed.gff	exon	73221629	73222230	.	-	.	gene_id "RI:1:73221629:73222230-73222852:73223964:-"; transcript_id "RI:1:73221629:73222230-73222852:73223964:-:alternative2";
1	hq_isoforms.fasta.no5merge.collapsed.gff	exon	73222852	73223964	.	-	.	gene_id "RI:1:73221629:73222230-73222852:73223964:-"; transcript_id "RI:1:73221629:73222230-73222852:73223964:-:alternative2";
1	hq_isoforms.fasta.no5merge.collapsed.gff	exon	73221629	73223964	.	-	.	gene_id "RI:1:73221629:73222230-73222852:73223964:-"; transcript_id "RI:1:73221629:73222230-73222852:73223964:-:alternative1";
1	hq_isoforms.fasta.no5merge.collapsed.gff	exon	73222852	73222917	.	-	.	gene_id "RI:1:73222852:73222917-73223275:73223964:-"; transcript_id "RI:1:73222852:73222917-73223275:73223964:-:alternative2";
1	hq_isoforms.fasta.no5merge.collapsed.gff	exon	73223275	73223964	.	-	.	gene_id "RI:1:73222852:73222917-73223275:73223964:-"; transcript_id "RI:1:73222852:73222917-73223275:73223964:-:alternative2";
1	hq_isoforms.fasta.no5merge.collapsed.gff	exon	73222852	73223964	.	-	.	gene_id "RI:1:73222852:73222917-73223275:73223964:-"; transcript_id "RI:1:73222852:73222917-73223275:73223964:-:alternative1";
1	hq_isoforms.fasta.no5merge.collapsed.gff	exon	73223275	73223454	.	-	.	gene_id "RI:1:73223275:73223454-73223772:73223964:-"; transcript_id "RI:1:73223275:73223454-73223772:73223964:-:alternative2";
1	hq_isoforms.fasta.no5merge.collapsed.gff	exon	73223772	73223964	.	-	.	gene_id "RI:1:73223275:73223454-73223772:73223964:-"; transcript_id "RI:1:73223275:73223454-73223772:73223964:-:alternative2";
1	hq_isoforms.fasta.no5merge.collapsed.gff	exon	73223275	73223964	.	-	.	gene_id "RI:1:73223275:73223454-73223772:73223964:-"; transcript_id "RI:1:73223275:73223454-73223772:73223964:-:alternative1";
1	hq_isoforms.fasta.no5merge.collapsed.gff	exon	73223275	73223454	.	-	.	gene_id "RI:1:73223275:73223454-73223776:73223964:-"; transcript_id "RI:1:73223275:73223454-73223776:73223964:-:alternative2";
1	hq_isoforms.fasta.no5merge.collapsed.gff	exon	73223776	73223964	.	-	.	gene_id "RI:1:73223275:73223454-73223776:73223964:-"; transcript_id "RI:1:73223275:73223454-73223776:73223964:-:alternative2";
1	hq_isoforms.fasta.no5merge.collapsed.gff	exon	73223275	73223964	.	-	.	gene_id "RI:1:73223275:73223454-73223776:73223964:-"; transcript_id "RI:1:73223275:73223454-73223776:73223964:-:alternative1";
1	hq_isoforms.fasta.no5merge.collapsed.gff	exon	73377828	73377971	.	-	.	gene_id "RI:1:73377828:73377971-73378839:73378956:-"; transcript_id "RI:1:73377828:73377971-73378839:73378956:-:alternative2";
1	hq_isoforms.fasta.no5merge.collapsed.gff	exon	73378839	73378956	.	-	.	gene_id "RI:1:73377828:73377971-73378839:73378956:-"; transcript_id "RI:1:73377828:73377971-73378839:73378956:-:alternative2";
1	hq_isoforms.fasta.no5merge.collapsed.gff	exon	73377828	73378956	.	-	.	gene_id "RI:1:73377828:73377971-73378839:73378956:-"; transcript_id "RI:1:73377828:73377971-73378839:73378956:-:alternative1";
1	hq_isoforms.fasta.no5merge.collapsed.gff	exon	73374056	73374206	.	-	.	gene_id "RI:1:73374056:73374206-73375885:73376125:-"; transcript_id "RI:1:73374056:73374206-73375885:73376125:-:alternative2";
1	hq_isoforms.fasta.no5merge.collapsed.gff	exon	73375885	73376125	.	-	.	gene_id "RI:1:73374056:73374206-73375885:73376125:-"; transcript_id "RI:1:73374056:73374206-73375885:73376125:-:alternative2";
1	hq_isoforms.fasta.no5merge.collapsed.gff	exon	73374056	73376125	.	-	.	gene_id "RI:1:73374056:73374206-73375885:73376125:-"; transcript_id "RI:1:73374056:73374206-73375885:73376125:-:alternative1";
1	hq_isoforms.fasta.no5merge.collapsed.gff	exon	73375885	73376125	.	-	.	gene_id "RI:1:73375885:73376125-73377828:73378956:-"; transcript_id "RI:1:73375885:73376125-73377828:73378956:-:alternative2";
1	hq_isoforms.fasta.no5merge.collapsed.gff	exon	73377828	73378956	.	-	.	gene_id "RI:1:73375885:73376125-73377828:73378956:-"; transcript_id "RI:1:73375885:73376125-73377828:73378956:-:alternative2";
1	hq_isoforms.fasta.no5merge.collapsed.gff	exon	73375885	73378956	.	-	.	gene_id "RI:1:73375885:73376125-73377828:73378956:-"; transcript_id "RI:1:73375885:73376125-73377828:73378956:-:alternative1";
1	hq_isoforms.fasta.no5merge.collapsed.gff	exon	73375885	73378482	.	-	.	gene_id "RI:1:73375885:73378482-73378839:73378956:-"; transcript_id "RI:1:73375885:73378482-73378839:73378956:-:alternative2";
1	hq_isoforms.fasta.no5merge.collapsed.gff	exon	73378839	73378956	.	-	.	gene_id "RI:1:73375885:73378482-73378839:73378956:-"; transcript_id "RI:1:73375885:73378482-73378839:73378956:-:alternative2";
1	hq_isoforms.fasta.no5merge.collapsed.gff	exon	73375885	73378956	.	-	.	gene_id "RI:1:73375885:73378482-73378839:73378956:-"; transcript_id "RI:1:73375885:73378482-73378839:73378956:-:alternative1";
1	hq_isoforms.fasta.no5merge.collapsed.gff	exon	73422992	73423115	.	-	.	gene_id "RI:1:73422992:73423115-73426215:73426298:-"; transcript_id "RI:1:73422992:73423115-73426215:73426298:-:alternative2";
1	hq_isoforms.fasta.no5merge.collapsed.gff	exon	73426215	73426298	.	-	.	gene_id "RI:1:73422992:73423115-73426215:73426298:-"; transcript_id "RI:1:73422992:73423115-73426215:73426298:-:alternative2";
1	hq_isoforms.fasta.no5merge.collapsed.gff	exon	73422992	73426298	.	-	.	gene_id "RI:1:73422992:73423115-73426215:73426298:-"; transcript_id "RI:1:73422992:73423115-73426215:73426298:-:alternative1";
1	hq_isoforms.fasta.no5merge.collapsed.gff	exon	73553713	73555918	.	-	.	gene_id "RI:1:73553713:73555918-73555945:73556250:-"; transcript_id "RI:1:73553713:73555918-73555945:73556250:-:alternative2";
1	hq_isoforms.fasta.no5merge.collapsed.gff	exon	73555945	73556250	.	-	.	gene_id "RI:1:73553713:73555918-73555945:73556250:-"; transcript_id "RI:1:73553713:73555918-73555945:73556250:-:alternative2";
1	hq_isoforms.fasta.no5merge.collapsed.gff	exon	73553713	73556250	.	-	.	gene_id "RI:1:73553713:73555918-73555945:73556250:-"; transcript_id "RI:1:73553713:73555918-73555945:73556250:-:alternative1";
1	hq_isoforms.fasta.no5merge.collapsed.gff	exon	74407245	74407291	.	-	.	gene_id "RI:1:74407245:74407291-74408075:74408290:-"; transcript_id "RI:1:74407245:74407291-74408075:74408290:-:alternative2";
1	hq_isoforms.fasta.no5merge.collapsed.gff	exon	74408075	74408290	.	-	.	gene_id "RI:1:74407245:74407291-74408075:74408290:-"; transcript_id "RI:1:74407245:74407291-74408075:74408290:-:alternative2";
1	hq_isoforms.fasta.no5merge.collapsed.gff	exon	74407245	74408290	.	-	.	gene_id "RI:1:74407245:74407291-74408075:74408290:-"; transcript_id "RI:1:74407245:74407291-74408075:74408290:-:alternative1";
1	hq_isoforms.fasta.no5merge.collapsed.gff	exon	74432859	74432963	.	-	.	gene_id "RI:1:74432859:74432963-74433134:74433235:-"; transcript_id "RI:1:74432859:74432963-74433134:74433235:-:alternative2";
1	hq_isoforms.fasta.no5merge.collapsed.gff	exon	74433134	74433235	.	-	.	gene_id "RI:1:74432859:74432963-74433134:74433235:-"; transcript_id "RI:1:74432859:74432963-74433134:74433235:-:alternative2";
1	hq_isoforms.fasta.no5merge.collapsed.gff	exon	74432859	74433235	.	-	.	gene_id "RI:1:74432859:74432963-74433134:74433235:-"; transcript_id "RI:1:74432859:74432963-74433134:74433235:-:alternative1";
1	hq_isoforms.fasta.no5merge.collapsed.gff	exon	74433651	74433715	.	-	.	gene_id "RI:1:74433651:74433715-74434569:74434612:-"; transcript_id "RI:1:74433651:74433715-74434569:74434612:-:alternative2";
1	hq_isoforms.fasta.no5merge.collapsed.gff	exon	74434569	74434612	.	-	.	gene_id "RI:1:74433651:74433715-74434569:74434612:-"; transcript_id "RI:1:74433651:74433715-74434569:74434612:-:alternative2";
1	hq_isoforms.fasta.no5merge.collapsed.gff	exon	74433651	74434612	.	-	.	gene_id "RI:1:74433651:74433715-74434569:74434612:-"; transcript_id "RI:1:74433651:74433715-74434569:74434612:-:alternative1";
1	hq_isoforms.fasta.no5merge.collapsed.gff	exon	74696450	74697477	.	-	.	gene_id "RI:1:74696450:74697477-74698724:74698858:-"; transcript_id "RI:1:74696450:74697477-74698724:74698858:-:alternative2";
1	hq_isoforms.fasta.no5merge.collapsed.gff	exon	74698724	74698858	.	-	.	gene_id "RI:1:74696450:74697477-74698724:74698858:-"; transcript_id "RI:1:74696450:74697477-74698724:74698858:-:alternative2";
1	hq_isoforms.fasta.no5merge.collapsed.gff	exon	74696450	74698858	.	-	.	gene_id "RI:1:74696450:74697477-74698724:74698858:-"; transcript_id "RI:1:74696450:74697477-74698724:74698858:-:alternative1";
1	hq_isoforms.fasta.no5merge.collapsed.gff	exon	75082206	75082357	.	-	.	gene_id "RI:1:75082206:75082357-75084937:75085135:-"; transcript_id "RI:1:75082206:75082357-75084937:75085135:-:alternative2";
1	hq_isoforms.fasta.no5merge.collapsed.gff	exon	75084937	75085135	.	-	.	gene_id "RI:1:75082206:75082357-75084937:75085135:-"; transcript_id "RI:1:75082206:75082357-75084937:75085135:-:alternative2";
1	hq_isoforms.fasta.no5merge.collapsed.gff	exon	75082206	75085135	.	-	.	gene_id "RI:1:75082206:75082357-75084937:75085135:-"; transcript_id "RI:1:75082206:75082357-75084937:75085135:-:alternative1";
1	hq_isoforms.fasta.no5merge.collapsed.gff	exon	75139610	75140768	.	-	.	gene_id "RI:1:75139610:75140768-75142999:75143158:-"; transcript_id "RI:1:75139610:75140768-75142999:75143158:-:alternative2";
1	hq_isoforms.fasta.no5merge.collapsed.gff	exon	75142999	75143158	.	-	.	gene_id "RI:1:75139610:75140768-75142999:75143158:-"; transcript_id "RI:1:75139610:75140768-75142999:75143158:-:alternative2";
1	hq_isoforms.fasta.no5merge.collapsed.gff	exon	75139610	75143158	.	-	.	gene_id "RI:1:75139610:75140768-75142999:75143158:-"; transcript_id "RI:1:75139610:75140768-75142999:75143158:-:alternative1";
1	hq_isoforms.fasta.no5merge.collapsed.gff	exon	75144841	75144919	.	-	.	gene_id "RI:1:75144841:75144919-75146476:75147190:-"; transcript_id "RI:1:75144841:75144919-75146476:75147190:-:alternative2";
1	hq_isoforms.fasta.no5merge.collapsed.gff	exon	75146476	75147190	.	-	.	gene_id "RI:1:75144841:75144919-75146476:75147190:-"; transcript_id "RI:1:75144841:75144919-75146476:75147190:-:alternative2";
1	hq_isoforms.fasta.no5merge.collapsed.gff	exon	75144841	75147190	.	-	.	gene_id "RI:1:75144841:75144919-75146476:75147190:-"; transcript_id "RI:1:75144841:75144919-75146476:75147190:-:alternative1";
1	hq_isoforms.fasta.no5merge.collapsed.gff	exon	76246797	76246878	.	-	.	gene_id "RI:1:76246797:76246878-76249941:76250119:-"; transcript_id "RI:1:76246797:76246878-76249941:76250119:-:alternative2";
1	hq_isoforms.fasta.no5merge.collapsed.gff	exon	76249941	76250119	.	-	.	gene_id "RI:1:76246797:76246878-76249941:76250119:-"; transcript_id "RI:1:76246797:76246878-76249941:76250119:-:alternative2";
1	hq_isoforms.fasta.no5merge.collapsed.gff	exon	76246797	76250119	.	-	.	gene_id "RI:1:76246797:76246878-76249941:76250119:-"; transcript_id "RI:1:76246797:76246878-76249941:76250119:-:alternative1";
1	hq_isoforms.fasta.no5merge.collapsed.gff	exon	77704535	77704602	.	-	.	gene_id "RI:1:77704535:77704602-77705150:77705252:-"; transcript_id "RI:1:77704535:77704602-77705150:77705252:-:alternative2";
1	hq_isoforms.fasta.no5merge.collapsed.gff	exon	77705150	77705252	.	-	.	gene_id "RI:1:77704535:77704602-77705150:77705252:-"; transcript_id "RI:1:77704535:77704602-77705150:77705252:-:alternative2";
1	hq_isoforms.fasta.no5merge.collapsed.gff	exon	77704535	77705252	.	-	.	gene_id "RI:1:77704535:77704602-77705150:77705252:-"; transcript_id "RI:1:77704535:77704602-77705150:77705252:-:alternative1";
1	hq_isoforms.fasta.no5merge.collapsed.gff	exon	77706299	77706440	.	-	.	gene_id "RI:1:77706299:77706440-77709339:77709430:-"; transcript_id "RI:1:77706299:77706440-77709339:77709430:-:alternative2";
1	hq_isoforms.fasta.no5merge.collapsed.gff	exon	77709339	77709430	.	-	.	gene_id "RI:1:77706299:77706440-77709339:77709430:-"; transcript_id "RI:1:77706299:77706440-77709339:77709430:-:alternative2";
1	hq_isoforms.fasta.no5merge.collapsed.gff	exon	77706299	77709430	.	-	.	gene_id "RI:1:77706299:77706440-77709339:77709430:-"; transcript_id "RI:1:77706299:77706440-77709339:77709430:-:alternative1";
1	hq_isoforms.fasta.no5merge.collapsed.gff	exon	77706299	77706440	.	-	.	gene_id "RI:1:77706299:77706440-77709301:77709430:-"; transcript_id "RI:1:77706299:77706440-77709301:77709430:-:alternative2";
1	hq_isoforms.fasta.no5merge.collapsed.gff	exon	77709301	77709430	.	-	.	gene_id "RI:1:77706299:77706440-77709301:77709430:-"; transcript_id "RI:1:77706299:77706440-77709301:77709430:-:alternative2";
1	hq_isoforms.fasta.no5merge.collapsed.gff	exon	77706299	77709430	.	-	.	gene_id "RI:1:77706299:77706440-77709301:77709430:-"; transcript_id "RI:1:77706299:77706440-77709301:77709430:-:alternative1";
1	hq_isoforms.fasta.no5merge.collapsed.gff	exon	77695624	77695891	.	-	.	gene_id "RI:1:77695624:77695891-77697997:77700118:-"; transcript_id "RI:1:77695624:77695891-77697997:77700118:-:alternative2";
1	hq_isoforms.fasta.no5merge.collapsed.gff	exon	77697997	77700118	.	-	.	gene_id "RI:1:77695624:77695891-77697997:77700118:-"; transcript_id "RI:1:77695624:77695891-77697997:77700118:-:alternative2";
1	hq_isoforms.fasta.no5merge.collapsed.gff	exon	77695624	77700118	.	-	.	gene_id "RI:1:77695624:77695891-77697997:77700118:-"; transcript_id "RI:1:77695624:77695891-77697997:77700118:-:alternative1";
1	hq_isoforms.fasta.no5merge.collapsed.gff	exon	77697997	77698063	.	-	.	gene_id "RI:1:77697997:77698063-77700023:77700118:-"; transcript_id "RI:1:77697997:77698063-77700023:77700118:-:alternative2";
1	hq_isoforms.fasta.no5merge.collapsed.gff	exon	77700023	77700118	.	-	.	gene_id "RI:1:77697997:77698063-77700023:77700118:-"; transcript_id "RI:1:77697997:77698063-77700023:77700118:-:alternative2";
1	hq_isoforms.fasta.no5merge.collapsed.gff	exon	77697997	77700118	.	-	.	gene_id "RI:1:77697997:77698063-77700023:77700118:-"; transcript_id "RI:1:77697997:77698063-77700023:77700118:-:alternative1";
1	hq_isoforms.fasta.no5merge.collapsed.gff	exon	77704535	77705252	.	-	.	gene_id "RI:1:77704535:77705252-77706299:77709430:-"; transcript_id "RI:1:77704535:77705252-77706299:77709430:-:alternative2";
1	hq_isoforms.fasta.no5merge.collapsed.gff	exon	77706299	77709430	.	-	.	gene_id "RI:1:77704535:77705252-77706299:77709430:-"; transcript_id "RI:1:77704535:77705252-77706299:77709430:-:alternative2";
1	hq_isoforms.fasta.no5merge.collapsed.gff	exon	77704535	77709430	.	-	.	gene_id "RI:1:77704535:77705252-77706299:77709430:-"; transcript_id "RI:1:77704535:77705252-77706299:77709430:-:alternative1";
1	hq_isoforms.fasta.no5merge.collapsed.gff	exon	78018204	78018271	.	-	.	gene_id "RI:1:78018204:78018271-78019498:78019555:-"; transcript_id "RI:1:78018204:78018271-78019498:78019555:-:alternative2";
1	hq_isoforms.fasta.no5merge.collapsed.gff	exon	78019498	78019555	.	-	.	gene_id "RI:1:78018204:78018271-78019498:78019555:-"; transcript_id "RI:1:78018204:78018271-78019498:78019555:-:alternative2";
1	hq_isoforms.fasta.no5merge.collapsed.gff	exon	78018204	78019555	.	-	.	gene_id "RI:1:78018204:78018271-78019498:78019555:-"; transcript_id "RI:1:78018204:78018271-78019498:78019555:-:alternative1";
1	hq_isoforms.fasta.no5merge.collapsed.gff	exon	78019498	78019555	.	-	.	gene_id "RI:1:78019498:78019555-78024672:78024874:-"; transcript_id "RI:1:78019498:78019555-78024672:78024874:-:alternative2";
1	hq_isoforms.fasta.no5merge.collapsed.gff	exon	78024672	78024874	.	-	.	gene_id "RI:1:78019498:78019555-78024672:78024874:-"; transcript_id "RI:1:78019498:78019555-78024672:78024874:-:alternative2";
1	hq_isoforms.fasta.no5merge.collapsed.gff	exon	78019498	78024874	.	-	.	gene_id "RI:1:78019498:78019555-78024672:78024874:-"; transcript_id "RI:1:78019498:78019555-78024672:78024874:-:alternative1";
1	hq_isoforms.fasta.no5merge.collapsed.gff	exon	78602279	78602389	.	-	.	gene_id "RI:1:78602279:78602389-78602451:78602475:-"; transcript_id "RI:1:78602279:78602389-78602451:78602475:-:alternative2";
1	hq_isoforms.fasta.no5merge.collapsed.gff	exon	78602451	78602475	.	-	.	gene_id "RI:1:78602279:78602389-78602451:78602475:-"; transcript_id "RI:1:78602279:78602389-78602451:78602475:-:alternative2";
1	hq_isoforms.fasta.no5merge.collapsed.gff	exon	78602279	78602475	.	-	.	gene_id "RI:1:78602279:78602389-78602451:78602475:-"; transcript_id "RI:1:78602279:78602389-78602451:78602475:-:alternative1";
1	hq_isoforms.fasta.no5merge.collapsed.gff	exon	78598939	78599104	.	-	.	gene_id "RI:1:78598939:78599104-78599367:78599441:-"; transcript_id "RI:1:78598939:78599104-78599367:78599441:-:alternative2";
1	hq_isoforms.fasta.no5merge.collapsed.gff	exon	78599367	78599441	.	-	.	gene_id "RI:1:78598939:78599104-78599367:78599441:-"; transcript_id "RI:1:78598939:78599104-78599367:78599441:-:alternative2";
1	hq_isoforms.fasta.no5merge.collapsed.gff	exon	78598939	78599441	.	-	.	gene_id "RI:1:78598939:78599104-78599367:78599441:-"; transcript_id "RI:1:78598939:78599104-78599367:78599441:-:alternative1";
1	hq_isoforms.fasta.no5merge.collapsed.gff	exon	78616940	78617109	.	-	.	gene_id "RI:1:78616940:78617109-78617427:78619074:-"; transcript_id "RI:1:78616940:78617109-78617427:78619074:-:alternative2";
1	hq_isoforms.fasta.no5merge.collapsed.gff	exon	78617427	78619074	.	-	.	gene_id "RI:1:78616940:78617109-78617427:78619074:-"; transcript_id "RI:1:78616940:78617109-78617427:78619074:-:alternative2";
1	hq_isoforms.fasta.no5merge.collapsed.gff	exon	78616940	78619074	.	-	.	gene_id "RI:1:78616940:78617109-78617427:78619074:-"; transcript_id "RI:1:78616940:78617109-78617427:78619074:-:alternative1";
1	hq_isoforms.fasta.no5merge.collapsed.gff	exon	78617427	78617447	.	-	.	gene_id "RI:1:78617427:78617447-78617964:78618016:-"; transcript_id "RI:1:78617427:78617447-78617964:78618016:-:alternative2";
1	hq_isoforms.fasta.no5merge.collapsed.gff	exon	78617964	78618016	.	-	.	gene_id "RI:1:78617427:78617447-78617964:78618016:-"; transcript_id "RI:1:78617427:78617447-78617964:78618016:-:alternative2";
1	hq_isoforms.fasta.no5merge.collapsed.gff	exon	78617427	78618016	.	-	.	gene_id "RI:1:78617427:78617447-78617964:78618016:-"; transcript_id "RI:1:78617427:78617447-78617964:78618016:-:alternative1";
1	hq_isoforms.fasta.no5merge.collapsed.gff	exon	78617427	78617447	.	-	.	gene_id "RI:1:78617427:78617447-78618915:78619074:-"; transcript_id "RI:1:78617427:78617447-78618915:78619074:-:alternative2";
1	hq_isoforms.fasta.no5merge.collapsed.gff	exon	78618915	78619074	.	-	.	gene_id "RI:1:78617427:78617447-78618915:78619074:-"; transcript_id "RI:1:78617427:78617447-78618915:78619074:-:alternative2";
1	hq_isoforms.fasta.no5merge.collapsed.gff	exon	78617427	78619074	.	-	.	gene_id "RI:1:78617427:78617447-78618915:78619074:-"; transcript_id "RI:1:78617427:78617447-78618915:78619074:-:alternative1";
1	hq_isoforms.fasta.no5merge.collapsed.gff	exon	78617427	78618016	.	-	.	gene_id "RI:1:78617427:78618016-78618915:78619074:-"; transcript_id "RI:1:78617427:78618016-78618915:78619074:-:alternative2";
1	hq_isoforms.fasta.no5merge.collapsed.gff	exon	78618915	78619074	.	-	.	gene_id "RI:1:78617427:78618016-78618915:78619074:-"; transcript_id "RI:1:78617427:78618016-78618915:78619074:-:alternative2";
1	hq_isoforms.fasta.no5merge.collapsed.gff	exon	78617427	78619074	.	-	.	gene_id "RI:1:78617427:78618016-78618915:78619074:-"; transcript_id "RI:1:78617427:78618016-78618915:78619074:-:alternative1";
1	hq_isoforms.fasta.no5merge.collapsed.gff	exon	78648709	78649630	.	-	.	gene_id "RI:1:78648709:78649630-78650196:78650307:-"; transcript_id "RI:1:78648709:78649630-78650196:78650307:-:alternative2";
1	hq_isoforms.fasta.no5merge.collapsed.gff	exon	78650196	78650307	.	-	.	gene_id "RI:1:78648709:78649630-78650196:78650307:-"; transcript_id "RI:1:78648709:78649630-78650196:78650307:-:alternative2";
1	hq_isoforms.fasta.no5merge.collapsed.gff	exon	78648709	78650307	.	-	.	gene_id "RI:1:78648709:78649630-78650196:78650307:-"; transcript_id "RI:1:78648709:78649630-78650196:78650307:-:alternative1";
1	hq_isoforms.fasta.no5merge.collapsed.gff	exon	78648709	78648859	.	-	.	gene_id "RI:1:78648709:78648859-78649522:78649630:-"; transcript_id "RI:1:78648709:78648859-78649522:78649630:-:alternative2";
1	hq_isoforms.fasta.no5merge.collapsed.gff	exon	78649522	78649630	.	-	.	gene_id "RI:1:78648709:78648859-78649522:78649630:-"; transcript_id "RI:1:78648709:78648859-78649522:78649630:-:alternative2";
1	hq_isoforms.fasta.no5merge.collapsed.gff	exon	78648709	78649630	.	-	.	gene_id "RI:1:78648709:78648859-78649522:78649630:-"; transcript_id "RI:1:78648709:78648859-78649522:78649630:-:alternative1";
1	hq_isoforms.fasta.no5merge.collapsed.gff	exon	78993325	78995180	.	-	.	gene_id "RI:1:78993325:78995180-78995228:78996038:-"; transcript_id "RI:1:78993325:78995180-78995228:78996038:-:alternative2";
1	hq_isoforms.fasta.no5merge.collapsed.gff	exon	78995228	78996038	.	-	.	gene_id "RI:1:78993325:78995180-78995228:78996038:-"; transcript_id "RI:1:78993325:78995180-78995228:78996038:-:alternative2";
1	hq_isoforms.fasta.no5merge.collapsed.gff	exon	78993325	78996038	.	-	.	gene_id "RI:1:78993325:78995180-78995228:78996038:-"; transcript_id "RI:1:78993325:78995180-78995228:78996038:-:alternative1";
1	hq_isoforms.fasta.no5merge.collapsed.gff	exon	78996473	78996676	.	-	.	gene_id "RI:1:78996473:78996676-78996940:78997549:-"; transcript_id "RI:1:78996473:78996676-78996940:78997549:-:alternative2";
1	hq_isoforms.fasta.no5merge.collapsed.gff	exon	78996940	78997549	.	-	.	gene_id "RI:1:78996473:78996676-78996940:78997549:-"; transcript_id "RI:1:78996473:78996676-78996940:78997549:-:alternative2";
1	hq_isoforms.fasta.no5merge.collapsed.gff	exon	78996473	78997549	.	-	.	gene_id "RI:1:78996473:78996676-78996940:78997549:-"; transcript_id "RI:1:78996473:78996676-78996940:78997549:-:alternative1";
1	hq_isoforms.fasta.no5merge.collapsed.gff	exon	78996940	78997041	.	-	.	gene_id "RI:1:78996940:78997041-78997445:78997549:-"; transcript_id "RI:1:78996940:78997041-78997445:78997549:-:alternative2";
1	hq_isoforms.fasta.no5merge.collapsed.gff	exon	78997445	78997549	.	-	.	gene_id "RI:1:78996940:78997041-78997445:78997549:-"; transcript_id "RI:1:78996940:78997041-78997445:78997549:-:alternative2";
1	hq_isoforms.fasta.no5merge.collapsed.gff	exon	78996940	78997549	.	-	.	gene_id "RI:1:78996940:78997041-78997445:78997549:-"; transcript_id "RI:1:78996940:78997041-78997445:78997549:-:alternative1";
1	hq_isoforms.fasta.no5merge.collapsed.gff	exon	79350971	79351103	.	-	.	gene_id "RI:1:79350971:79351103-79351426:79351534:-"; transcript_id "RI:1:79350971:79351103-79351426:79351534:-:alternative2";
1	hq_isoforms.fasta.no5merge.collapsed.gff	exon	79351426	79351534	.	-	.	gene_id "RI:1:79350971:79351103-79351426:79351534:-"; transcript_id "RI:1:79350971:79351103-79351426:79351534:-:alternative2";
1	hq_isoforms.fasta.no5merge.collapsed.gff	exon	79350971	79351534	.	-	.	gene_id "RI:1:79350971:79351103-79351426:79351534:-"; transcript_id "RI:1:79350971:79351103-79351426:79351534:-:alternative1";
1	hq_isoforms.fasta.no5merge.collapsed.gff	exon	79426925	79427166	.	-	.	gene_id "RI:1:79426925:79427166-79427325:79427499:-"; transcript_id "RI:1:79426925:79427166-79427325:79427499:-:alternative2";
1	hq_isoforms.fasta.no5merge.collapsed.gff	exon	79427325	79427499	.	-	.	gene_id "RI:1:79426925:79427166-79427325:79427499:-"; transcript_id "RI:1:79426925:79427166-79427325:79427499:-:alternative2";
1	hq_isoforms.fasta.no5merge.collapsed.gff	exon	79426925	79427499	.	-	.	gene_id "RI:1:79426925:79427166-79427325:79427499:-"; transcript_id "RI:1:79426925:79427166-79427325:79427499:-:alternative1";
1	hq_isoforms.fasta.no5merge.collapsed.gff	exon	79425696	79425757	.	-	.	gene_id "RI:1:79425696:79425757-79426149:79426296:-"; transcript_id "RI:1:79425696:79425757-79426149:79426296:-:alternative2";
1	hq_isoforms.fasta.no5merge.collapsed.gff	exon	79426149	79426296	.	-	.	gene_id "RI:1:79425696:79425757-79426149:79426296:-"; transcript_id "RI:1:79425696:79425757-79426149:79426296:-:alternative2";
1	hq_isoforms.fasta.no5merge.collapsed.gff	exon	79425696	79426296	.	-	.	gene_id "RI:1:79425696:79425757-79426149:79426296:-"; transcript_id "RI:1:79425696:79425757-79426149:79426296:-:alternative1";
1	hq_isoforms.fasta.no5merge.collapsed.gff	exon	79426622	79426730	.	-	.	gene_id "RI:1:79426622:79426730-79427052:79427499:-"; transcript_id "RI:1:79426622:79426730-79427052:79427499:-:alternative2";
1	hq_isoforms.fasta.no5merge.collapsed.gff	exon	79427052	79427499	.	-	.	gene_id "RI:1:79426622:79426730-79427052:79427499:-"; transcript_id "RI:1:79426622:79426730-79427052:79427499:-:alternative2";
1	hq_isoforms.fasta.no5merge.collapsed.gff	exon	79426622	79427499	.	-	.	gene_id "RI:1:79426622:79426730-79427052:79427499:-"; transcript_id "RI:1:79426622:79426730-79427052:79427499:-:alternative1";
1	hq_isoforms.fasta.no5merge.collapsed.gff	exon	79426622	79426730	.	-	.	gene_id "RI:1:79426622:79426730-79426925:79427499:-"; transcript_id "RI:1:79426622:79426730-79426925:79427499:-:alternative2";
1	hq_isoforms.fasta.no5merge.collapsed.gff	exon	79426925	79427499	.	-	.	gene_id "RI:1:79426622:79426730-79426925:79427499:-"; transcript_id "RI:1:79426622:79426730-79426925:79427499:-:alternative2";
1	hq_isoforms.fasta.no5merge.collapsed.gff	exon	79426622	79427499	.	-	.	gene_id "RI:1:79426622:79426730-79426925:79427499:-"; transcript_id "RI:1:79426622:79426730-79426925:79427499:-:alternative1";
1	hq_isoforms.fasta.no5merge.collapsed.gff	exon	79427052	79427166	.	-	.	gene_id "RI:1:79427052:79427166-79427333:79427499:-"; transcript_id "RI:1:79427052:79427166-79427333:79427499:-:alternative2";
1	hq_isoforms.fasta.no5merge.collapsed.gff	exon	79427333	79427499	.	-	.	gene_id "RI:1:79427052:79427166-79427333:79427499:-"; transcript_id "RI:1:79427052:79427166-79427333:79427499:-:alternative2";
1	hq_isoforms.fasta.no5merge.collapsed.gff	exon	79427052	79427499	.	-	.	gene_id "RI:1:79427052:79427166-79427333:79427499:-"; transcript_id "RI:1:79427052:79427166-79427333:79427499:-:alternative1";
1	hq_isoforms.fasta.no5merge.collapsed.gff	exon	79507900	79508475	.	-	.	gene_id "RI:1:79507900:79508475-79509017:79509257:-"; transcript_id "RI:1:79507900:79508475-79509017:79509257:-:alternative2";
1	hq_isoforms.fasta.no5merge.collapsed.gff	exon	79509017	79509257	.	-	.	gene_id "RI:1:79507900:79508475-79509017:79509257:-"; transcript_id "RI:1:79507900:79508475-79509017:79509257:-:alternative2";
1	hq_isoforms.fasta.no5merge.collapsed.gff	exon	79507900	79509257	.	-	.	gene_id "RI:1:79507900:79508475-79509017:79509257:-"; transcript_id "RI:1:79507900:79508475-79509017:79509257:-:alternative1";
1	hq_isoforms.fasta.no5merge.collapsed.gff	exon	79510723	79510776	.	-	.	gene_id "RI:1:79510723:79510776-79512867:79512902:-"; transcript_id "RI:1:79510723:79510776-79512867:79512902:-:alternative2";
1	hq_isoforms.fasta.no5merge.collapsed.gff	exon	79512867	79512902	.	-	.	gene_id "RI:1:79510723:79510776-79512867:79512902:-"; transcript_id "RI:1:79510723:79510776-79512867:79512902:-:alternative2";
1	hq_isoforms.fasta.no5merge.collapsed.gff	exon	79510723	79512902	.	-	.	gene_id "RI:1:79510723:79510776-79512867:79512902:-"; transcript_id "RI:1:79510723:79510776-79512867:79512902:-:alternative1";
1	hq_isoforms.fasta.no5merge.collapsed.gff	exon	79667469	79668792	.	-	.	gene_id "RI:1:79667469:79668792-79669065:79669187:-"; transcript_id "RI:1:79667469:79668792-79669065:79669187:-:alternative2";
1	hq_isoforms.fasta.no5merge.collapsed.gff	exon	79669065	79669187	.	-	.	gene_id "RI:1:79667469:79668792-79669065:79669187:-"; transcript_id "RI:1:79667469:79668792-79669065:79669187:-:alternative2";
1	hq_isoforms.fasta.no5merge.collapsed.gff	exon	79667469	79669187	.	-	.	gene_id "RI:1:79667469:79668792-79669065:79669187:-"; transcript_id "RI:1:79667469:79668792-79669065:79669187:-:alternative1";
1	hq_isoforms.fasta.no5merge.collapsed.gff	exon	79681746	79681875	.	-	.	gene_id "RI:1:79681746:79681875-79683547:79683731:-"; transcript_id "RI:1:79681746:79681875-79683547:79683731:-:alternative2";
1	hq_isoforms.fasta.no5merge.collapsed.gff	exon	79683547	79683731	.	-	.	gene_id "RI:1:79681746:79681875-79683547:79683731:-"; transcript_id "RI:1:79681746:79681875-79683547:79683731:-:alternative2";
1	hq_isoforms.fasta.no5merge.collapsed.gff	exon	79681746	79683731	.	-	.	gene_id "RI:1:79681746:79681875-79683547:79683731:-"; transcript_id "RI:1:79681746:79681875-79683547:79683731:-:alternative1";
1	hq_isoforms.fasta.no5merge.collapsed.gff	exon	79681746	79682924	.	-	.	gene_id "RI:1:79681746:79682924-79683547:79683731:-"; transcript_id "RI:1:79681746:79682924-79683547:79683731:-:alternative2";
1	hq_isoforms.fasta.no5merge.collapsed.gff	exon	79683547	79683731	.	-	.	gene_id "RI:1:79681746:79682924-79683547:79683731:-"; transcript_id "RI:1:79681746:79682924-79683547:79683731:-:alternative2";
1	hq_isoforms.fasta.no5merge.collapsed.gff	exon	79681746	79683731	.	-	.	gene_id "RI:1:79681746:79682924-79683547:79683731:-"; transcript_id "RI:1:79681746:79682924-79683547:79683731:-:alternative1";
1	hq_isoforms.fasta.no5merge.collapsed.gff	exon	79681746	79682955	.	-	.	gene_id "RI:1:79681746:79682955-79683547:79683731:-"; transcript_id "RI:1:79681746:79682955-79683547:79683731:-:alternative2";
1	hq_isoforms.fasta.no5merge.collapsed.gff	exon	79683547	79683731	.	-	.	gene_id "RI:1:79681746:79682955-79683547:79683731:-"; transcript_id "RI:1:79681746:79682955-79683547:79683731:-:alternative2";
1	hq_isoforms.fasta.no5merge.collapsed.gff	exon	79681746	79683731	.	-	.	gene_id "RI:1:79681746:79682955-79683547:79683731:-"; transcript_id "RI:1:79681746:79682955-79683547:79683731:-:alternative1";
1	hq_isoforms.fasta.no5merge.collapsed.gff	exon	80004999	80005083	.	-	.	gene_id "RI:1:80004999:80005083-80006219:80006320:-"; transcript_id "RI:1:80004999:80005083-80006219:80006320:-:alternative2";
1	hq_isoforms.fasta.no5merge.collapsed.gff	exon	80006219	80006320	.	-	.	gene_id "RI:1:80004999:80005083-80006219:80006320:-"; transcript_id "RI:1:80004999:80005083-80006219:80006320:-:alternative2";
1	hq_isoforms.fasta.no5merge.collapsed.gff	exon	80004999	80006320	.	-	.	gene_id "RI:1:80004999:80005083-80006219:80006320:-"; transcript_id "RI:1:80004999:80005083-80006219:80006320:-:alternative1";
1	hq_isoforms.fasta.no5merge.collapsed.gff	exon	80104063	80104191	.	-	.	gene_id "RI:1:80104063:80104191-80104922:80105003:-"; transcript_id "RI:1:80104063:80104191-80104922:80105003:-:alternative2";
1	hq_isoforms.fasta.no5merge.collapsed.gff	exon	80104922	80105003	.	-	.	gene_id "RI:1:80104063:80104191-80104922:80105003:-"; transcript_id "RI:1:80104063:80104191-80104922:80105003:-:alternative2";
1	hq_isoforms.fasta.no5merge.collapsed.gff	exon	80104063	80105003	.	-	.	gene_id "RI:1:80104063:80104191-80104922:80105003:-"; transcript_id "RI:1:80104063:80104191-80104922:80105003:-:alternative1";
1	hq_isoforms.fasta.no5merge.collapsed.gff	exon	80100252	80100345	.	-	.	gene_id "RI:1:80100252:80100345-80100836:80103201:-"; transcript_id "RI:1:80100252:80100345-80100836:80103201:-:alternative2";
1	hq_isoforms.fasta.no5merge.collapsed.gff	exon	80100836	80103201	.	-	.	gene_id "RI:1:80100252:80100345-80100836:80103201:-"; transcript_id "RI:1:80100252:80100345-80100836:80103201:-:alternative2";
1	hq_isoforms.fasta.no5merge.collapsed.gff	exon	80100252	80103201	.	-	.	gene_id "RI:1:80100252:80100345-80100836:80103201:-"; transcript_id "RI:1:80100252:80100345-80100836:80103201:-:alternative1";
1	hq_isoforms.fasta.no5merge.collapsed.gff	exon	80100252	80100952	.	-	.	gene_id "RI:1:80100252:80100952-80103166:80103201:-"; transcript_id "RI:1:80100252:80100952-80103166:80103201:-:alternative2";
1	hq_isoforms.fasta.no5merge.collapsed.gff	exon	80103166	80103201	.	-	.	gene_id "RI:1:80100252:80100952-80103166:80103201:-"; transcript_id "RI:1:80100252:80100952-80103166:80103201:-:alternative2";
1	hq_isoforms.fasta.no5merge.collapsed.gff	exon	80100252	80103201	.	-	.	gene_id "RI:1:80100252:80100952-80103166:80103201:-"; transcript_id "RI:1:80100252:80100952-80103166:80103201:-:alternative1";
1	hq_isoforms.fasta.no5merge.collapsed.gff	exon	80100836	80103201	.	-	.	gene_id "RI:1:80100836:80103201-80103629:80103729:-"; transcript_id "RI:1:80100836:80103201-80103629:80103729:-:alternative2";
1	hq_isoforms.fasta.no5merge.collapsed.gff	exon	80103629	80103729	.	-	.	gene_id "RI:1:80100836:80103201-80103629:80103729:-"; transcript_id "RI:1:80100836:80103201-80103629:80103729:-:alternative2";
1	hq_isoforms.fasta.no5merge.collapsed.gff	exon	80100836	80103729	.	-	.	gene_id "RI:1:80100836:80103201-80103629:80103729:-"; transcript_id "RI:1:80100836:80103201-80103629:80103729:-:alternative1";
1	hq_isoforms.fasta.no5merge.collapsed.gff	exon	80100252	80100345	.	-	.	gene_id "RI:1:80100252:80100345-80100836:80103729:-"; transcript_id "RI:1:80100252:80100345-80100836:80103729:-:alternative2";
1	hq_isoforms.fasta.no5merge.collapsed.gff	exon	80100836	80103729	.	-	.	gene_id "RI:1:80100252:80100345-80100836:80103729:-"; transcript_id "RI:1:80100252:80100345-80100836:80103729:-:alternative2";
1	hq_isoforms.fasta.no5merge.collapsed.gff	exon	80100252	80103729	.	-	.	gene_id "RI:1:80100252:80100345-80100836:80103729:-"; transcript_id "RI:1:80100252:80100345-80100836:80103729:-:alternative1";
1	hq_isoforms.fasta.no5merge.collapsed.gff	exon	80100252	80103201	.	-	.	gene_id "RI:1:80100252:80103201-80103629:80103729:-"; transcript_id "RI:1:80100252:80103201-80103629:80103729:-:alternative2";
1	hq_isoforms.fasta.no5merge.collapsed.gff	exon	80103629	80103729	.	-	.	gene_id "RI:1:80100252:80103201-80103629:80103729:-"; transcript_id "RI:1:80100252:80103201-80103629:80103729:-:alternative2";
1	hq_isoforms.fasta.no5merge.collapsed.gff	exon	80100252	80103729	.	-	.	gene_id "RI:1:80100252:80103201-80103629:80103729:-"; transcript_id "RI:1:80100252:80103201-80103629:80103729:-:alternative1";
1	hq_isoforms.fasta.no5merge.collapsed.gff	exon	80098887	80098959	.	-	.	gene_id "RI:1:80098887:80098959-80099015:80099030:-"; transcript_id "RI:1:80098887:80098959-80099015:80099030:-:alternative2";
1	hq_isoforms.fasta.no5merge.collapsed.gff	exon	80099015	80099030	.	-	.	gene_id "RI:1:80098887:80098959-80099015:80099030:-"; transcript_id "RI:1:80098887:80098959-80099015:80099030:-:alternative2";
1	hq_isoforms.fasta.no5merge.collapsed.gff	exon	80098887	80099030	.	-	.	gene_id "RI:1:80098887:80098959-80099015:80099030:-"; transcript_id "RI:1:80098887:80098959-80099015:80099030:-:alternative1";
1	hq_isoforms.fasta.no5merge.collapsed.gff	exon	80104064	80104191	.	-	.	gene_id "RI:1:80104064:80104191-80104922:80105003:-"; transcript_id "RI:1:80104064:80104191-80104922:80105003:-:alternative2";
1	hq_isoforms.fasta.no5merge.collapsed.gff	exon	80104922	80105003	.	-	.	gene_id "RI:1:80104064:80104191-80104922:80105003:-"; transcript_id "RI:1:80104064:80104191-80104922:80105003:-:alternative2";
1	hq_isoforms.fasta.no5merge.collapsed.gff	exon	80104064	80105003	.	-	.	gene_id "RI:1:80104064:80104191-80104922:80105003:-"; transcript_id "RI:1:80104064:80104191-80104922:80105003:-:alternative1";
1	hq_isoforms.fasta.no5merge.collapsed.gff	exon	80810189	80810320	.	-	.	gene_id "RI:1:80810189:80810320-80812228:80812329:-"; transcript_id "RI:1:80810189:80810320-80812228:80812329:-:alternative2";
1	hq_isoforms.fasta.no5merge.collapsed.gff	exon	80812228	80812329	.	-	.	gene_id "RI:1:80810189:80810320-80812228:80812329:-"; transcript_id "RI:1:80810189:80810320-80812228:80812329:-:alternative2";
1	hq_isoforms.fasta.no5merge.collapsed.gff	exon	80810189	80812329	.	-	.	gene_id "RI:1:80810189:80810320-80812228:80812329:-"; transcript_id "RI:1:80810189:80810320-80812228:80812329:-:alternative1";
1	hq_isoforms.fasta.no5merge.collapsed.gff	exon	81003760	81003890	.	-	.	gene_id "RI:1:81003760:81003890-81004688:81004743:-"; transcript_id "RI:1:81003760:81003890-81004688:81004743:-:alternative2";
1	hq_isoforms.fasta.no5merge.collapsed.gff	exon	81004688	81004743	.	-	.	gene_id "RI:1:81003760:81003890-81004688:81004743:-"; transcript_id "RI:1:81003760:81003890-81004688:81004743:-:alternative2";
1	hq_isoforms.fasta.no5merge.collapsed.gff	exon	81003760	81004743	.	-	.	gene_id "RI:1:81003760:81003890-81004688:81004743:-"; transcript_id "RI:1:81003760:81003890-81004688:81004743:-:alternative1";
1	hq_isoforms.fasta.no5merge.collapsed.gff	exon	81158678	81159454	.	-	.	gene_id "RI:1:81158678:81159454-81160000:81160120:-"; transcript_id "RI:1:81158678:81159454-81160000:81160120:-:alternative2";
1	hq_isoforms.fasta.no5merge.collapsed.gff	exon	81160000	81160120	.	-	.	gene_id "RI:1:81158678:81159454-81160000:81160120:-"; transcript_id "RI:1:81158678:81159454-81160000:81160120:-:alternative2";
1	hq_isoforms.fasta.no5merge.collapsed.gff	exon	81158678	81160120	.	-	.	gene_id "RI:1:81158678:81159454-81160000:81160120:-"; transcript_id "RI:1:81158678:81159454-81160000:81160120:-:alternative1";
1	hq_isoforms.fasta.no5merge.collapsed.gff	exon	81160000	81160120	.	-	.	gene_id "RI:1:81160000:81160120-81162769:81162911:-"; transcript_id "RI:1:81160000:81160120-81162769:81162911:-:alternative2";
1	hq_isoforms.fasta.no5merge.collapsed.gff	exon	81162769	81162911	.	-	.	gene_id "RI:1:81160000:81160120-81162769:81162911:-"; transcript_id "RI:1:81160000:81160120-81162769:81162911:-:alternative2";
1	hq_isoforms.fasta.no5merge.collapsed.gff	exon	81160000	81162911	.	-	.	gene_id "RI:1:81160000:81160120-81162769:81162911:-"; transcript_id "RI:1:81160000:81160120-81162769:81162911:-:alternative1";
1	hq_isoforms.fasta.no5merge.collapsed.gff	exon	82172187	82172783	.	-	.	gene_id "RI:1:82172187:82172783-82173489:82173636:-"; transcript_id "RI:1:82172187:82172783-82173489:82173636:-:alternative2";
1	hq_isoforms.fasta.no5merge.collapsed.gff	exon	82173489	82173636	.	-	.	gene_id "RI:1:82172187:82172783-82173489:82173636:-"; transcript_id "RI:1:82172187:82172783-82173489:82173636:-:alternative2";
1	hq_isoforms.fasta.no5merge.collapsed.gff	exon	82172187	82173636	.	-	.	gene_id "RI:1:82172187:82172783-82173489:82173636:-"; transcript_id "RI:1:82172187:82172783-82173489:82173636:-:alternative1";
1	hq_isoforms.fasta.no5merge.collapsed.gff	exon	82171384	82172126	.	-	.	gene_id "RI:1:82171384:82172126-82172187:82173636:-"; transcript_id "RI:1:82171384:82172126-82172187:82173636:-:alternative2";
1	hq_isoforms.fasta.no5merge.collapsed.gff	exon	82172187	82173636	.	-	.	gene_id "RI:1:82171384:82172126-82172187:82173636:-"; transcript_id "RI:1:82171384:82172126-82172187:82173636:-:alternative2";
1	hq_isoforms.fasta.no5merge.collapsed.gff	exon	82171384	82173636	.	-	.	gene_id "RI:1:82171384:82172126-82172187:82173636:-"; transcript_id "RI:1:82171384:82172126-82172187:82173636:-:alternative1";
1	hq_isoforms.fasta.no5merge.collapsed.gff	exon	82352471	82352585	.	-	.	gene_id "RI:1:82352471:82352585-82352787:82352913:-"; transcript_id "RI:1:82352471:82352585-82352787:82352913:-:alternative2";
1	hq_isoforms.fasta.no5merge.collapsed.gff	exon	82352787	82352913	.	-	.	gene_id "RI:1:82352471:82352585-82352787:82352913:-"; transcript_id "RI:1:82352471:82352585-82352787:82352913:-:alternative2";
1	hq_isoforms.fasta.no5merge.collapsed.gff	exon	82352471	82352913	.	-	.	gene_id "RI:1:82352471:82352585-82352787:82352913:-"; transcript_id "RI:1:82352471:82352585-82352787:82352913:-:alternative1";
1	hq_isoforms.fasta.no5merge.collapsed.gff	exon	83196493	83196584	.	-	.	gene_id "RI:1:83196493:83196584-83197525:83198328:-"; transcript_id "RI:1:83196493:83196584-83197525:83198328:-:alternative2";
1	hq_isoforms.fasta.no5merge.collapsed.gff	exon	83197525	83198328	.	-	.	gene_id "RI:1:83196493:83196584-83197525:83198328:-"; transcript_id "RI:1:83196493:83196584-83197525:83198328:-:alternative2";
1	hq_isoforms.fasta.no5merge.collapsed.gff	exon	83196493	83198328	.	-	.	gene_id "RI:1:83196493:83196584-83197525:83198328:-"; transcript_id "RI:1:83196493:83196584-83197525:83198328:-:alternative1";
1	hq_isoforms.fasta.no5merge.collapsed.gff	exon	83196493	83197626	.	-	.	gene_id "RI:1:83196493:83197626-83198198:83198328:-"; transcript_id "RI:1:83196493:83197626-83198198:83198328:-:alternative2";
1	hq_isoforms.fasta.no5merge.collapsed.gff	exon	83198198	83198328	.	-	.	gene_id "RI:1:83196493:83197626-83198198:83198328:-"; transcript_id "RI:1:83196493:83197626-83198198:83198328:-:alternative2";
1	hq_isoforms.fasta.no5merge.collapsed.gff	exon	83196493	83198328	.	-	.	gene_id "RI:1:83196493:83197626-83198198:83198328:-"; transcript_id "RI:1:83196493:83197626-83198198:83198328:-:alternative1";
1	hq_isoforms.fasta.no5merge.collapsed.gff	exon	83197525	83197626	.	-	.	gene_id "RI:1:83197525:83197626-83198198:83198328:-"; transcript_id "RI:1:83197525:83197626-83198198:83198328:-:alternative2";
1	hq_isoforms.fasta.no5merge.collapsed.gff	exon	83198198	83198328	.	-	.	gene_id "RI:1:83197525:83197626-83198198:83198328:-"; transcript_id "RI:1:83197525:83197626-83198198:83198328:-:alternative2";
1	hq_isoforms.fasta.no5merge.collapsed.gff	exon	83197525	83198328	.	-	.	gene_id "RI:1:83197525:83197626-83198198:83198328:-"; transcript_id "RI:1:83197525:83197626-83198198:83198328:-:alternative1";
1	hq_isoforms.fasta.no5merge.collapsed.gff	exon	83197525	83197626	.	-	.	gene_id "RI:1:83197525:83197626-83198197:83198328:-"; transcript_id "RI:1:83197525:83197626-83198197:83198328:-:alternative2";
1	hq_isoforms.fasta.no5merge.collapsed.gff	exon	83198197	83198328	.	-	.	gene_id "RI:1:83197525:83197626-83198197:83198328:-"; transcript_id "RI:1:83197525:83197626-83198197:83198328:-:alternative2";
1	hq_isoforms.fasta.no5merge.collapsed.gff	exon	83197525	83198328	.	-	.	gene_id "RI:1:83197525:83197626-83198197:83198328:-"; transcript_id "RI:1:83197525:83197626-83198197:83198328:-:alternative1";
1	hq_isoforms.fasta.no5merge.collapsed.gff	exon	83201051	83201201	.	-	.	gene_id "RI:1:83201051:83201201-83202994:83203130:-"; transcript_id "RI:1:83201051:83201201-83202994:83203130:-:alternative2";
1	hq_isoforms.fasta.no5merge.collapsed.gff	exon	83202994	83203130	.	-	.	gene_id "RI:1:83201051:83201201-83202994:83203130:-"; transcript_id "RI:1:83201051:83201201-83202994:83203130:-:alternative2";
1	hq_isoforms.fasta.no5merge.collapsed.gff	exon	83201051	83203130	.	-	.	gene_id "RI:1:83201051:83201201-83202994:83203130:-"; transcript_id "RI:1:83201051:83201201-83202994:83203130:-:alternative1";
1	hq_isoforms.fasta.no5merge.collapsed.gff	exon	83201051	83201201	.	-	.	gene_id "RI:1:83201051:83201201-83202995:83203130:-"; transcript_id "RI:1:83201051:83201201-83202995:83203130:-:alternative2";
1	hq_isoforms.fasta.no5merge.collapsed.gff	exon	83202995	83203130	.	-	.	gene_id "RI:1:83201051:83201201-83202995:83203130:-"; transcript_id "RI:1:83201051:83201201-83202995:83203130:-:alternative2";
1	hq_isoforms.fasta.no5merge.collapsed.gff	exon	83201051	83203130	.	-	.	gene_id "RI:1:83201051:83201201-83202995:83203130:-"; transcript_id "RI:1:83201051:83201201-83202995:83203130:-:alternative1";
1	hq_isoforms.fasta.no5merge.collapsed.gff	exon	83196493	83196584	.	-	.	gene_id "RI:1:83196493:83196584-83197525:83197626:-"; transcript_id "RI:1:83196493:83196584-83197525:83197626:-:alternative2";
1	hq_isoforms.fasta.no5merge.collapsed.gff	exon	83197525	83197626	.	-	.	gene_id "RI:1:83196493:83196584-83197525:83197626:-"; transcript_id "RI:1:83196493:83196584-83197525:83197626:-:alternative2";
1	hq_isoforms.fasta.no5merge.collapsed.gff	exon	83196493	83197626	.	-	.	gene_id "RI:1:83196493:83196584-83197525:83197626:-"; transcript_id "RI:1:83196493:83196584-83197525:83197626:-:alternative1";
1	hq_isoforms.fasta.no5merge.collapsed.gff	exon	83196493	83196583	.	-	.	gene_id "RI:1:83196493:83196583-83197525:83197626:-"; transcript_id "RI:1:83196493:83196583-83197525:83197626:-:alternative2";
1	hq_isoforms.fasta.no5merge.collapsed.gff	exon	83197525	83197626	.	-	.	gene_id "RI:1:83196493:83196583-83197525:83197626:-"; transcript_id "RI:1:83196493:83196583-83197525:83197626:-:alternative2";
1	hq_isoforms.fasta.no5merge.collapsed.gff	exon	83196493	83197626	.	-	.	gene_id "RI:1:83196493:83196583-83197525:83197626:-"; transcript_id "RI:1:83196493:83196583-83197525:83197626:-:alternative1";
1	hq_isoforms.fasta.no5merge.collapsed.gff	exon	83489105	83489178	.	-	.	gene_id "RI:1:83489105:83489178-83490520:83490616:-"; transcript_id "RI:1:83489105:83489178-83490520:83490616:-:alternative2";
1	hq_isoforms.fasta.no5merge.collapsed.gff	exon	83490520	83490616	.	-	.	gene_id "RI:1:83489105:83489178-83490520:83490616:-"; transcript_id "RI:1:83489105:83489178-83490520:83490616:-:alternative2";
1	hq_isoforms.fasta.no5merge.collapsed.gff	exon	83489105	83490616	.	-	.	gene_id "RI:1:83489105:83489178-83490520:83490616:-"; transcript_id "RI:1:83489105:83489178-83490520:83490616:-:alternative1";
1	hq_isoforms.fasta.no5merge.collapsed.gff	exon	83497499	83497613	.	-	.	gene_id "RI:1:83497499:83497613-83498881:83498987:-"; transcript_id "RI:1:83497499:83497613-83498881:83498987:-:alternative2";
1	hq_isoforms.fasta.no5merge.collapsed.gff	exon	83498881	83498987	.	-	.	gene_id "RI:1:83497499:83497613-83498881:83498987:-"; transcript_id "RI:1:83497499:83497613-83498881:83498987:-:alternative2";
1	hq_isoforms.fasta.no5merge.collapsed.gff	exon	83497499	83498987	.	-	.	gene_id "RI:1:83497499:83497613-83498881:83498987:-"; transcript_id "RI:1:83497499:83497613-83498881:83498987:-:alternative1";
1	hq_isoforms.fasta.no5merge.collapsed.gff	exon	83494376	83494457	.	-	.	gene_id "RI:1:83494376:83494457-83495995:83496026:-"; transcript_id "RI:1:83494376:83494457-83495995:83496026:-:alternative2";
1	hq_isoforms.fasta.no5merge.collapsed.gff	exon	83495995	83496026	.	-	.	gene_id "RI:1:83494376:83494457-83495995:83496026:-"; transcript_id "RI:1:83494376:83494457-83495995:83496026:-:alternative2";
1	hq_isoforms.fasta.no5merge.collapsed.gff	exon	83494376	83496026	.	-	.	gene_id "RI:1:83494376:83494457-83495995:83496026:-"; transcript_id "RI:1:83494376:83494457-83495995:83496026:-:alternative1";
1	hq_isoforms.fasta.no5merge.collapsed.gff	exon	86290667	86290743	.	-	.	gene_id "RI:1:86290667:86290743-86290893:86291115:-"; transcript_id "RI:1:86290667:86290743-86290893:86291115:-:alternative2";
1	hq_isoforms.fasta.no5merge.collapsed.gff	exon	86290893	86291115	.	-	.	gene_id "RI:1:86290667:86290743-86290893:86291115:-"; transcript_id "RI:1:86290667:86290743-86290893:86291115:-:alternative2";
1	hq_isoforms.fasta.no5merge.collapsed.gff	exon	86290667	86291115	.	-	.	gene_id "RI:1:86290667:86290743-86290893:86291115:-"; transcript_id "RI:1:86290667:86290743-86290893:86291115:-:alternative1";
1	hq_isoforms.fasta.no5merge.collapsed.gff	exon	86291485	86292616	.	-	.	gene_id "RI:1:86291485:86292616-86292710:86293367:-"; transcript_id "RI:1:86291485:86292616-86292710:86293367:-:alternative2";
1	hq_isoforms.fasta.no5merge.collapsed.gff	exon	86292710	86293367	.	-	.	gene_id "RI:1:86291485:86292616-86292710:86293367:-"; transcript_id "RI:1:86291485:86292616-86292710:86293367:-:alternative2";
1	hq_isoforms.fasta.no5merge.collapsed.gff	exon	86291485	86293367	.	-	.	gene_id "RI:1:86291485:86292616-86292710:86293367:-"; transcript_id "RI:1:86291485:86292616-86292710:86293367:-:alternative1";
1	hq_isoforms.fasta.no5merge.collapsed.gff	exon	86291485	86291862	.	-	.	gene_id "RI:1:86291485:86291862-86292684:86293367:-"; transcript_id "RI:1:86291485:86291862-86292684:86293367:-:alternative2";
1	hq_isoforms.fasta.no5merge.collapsed.gff	exon	86292684	86293367	.	-	.	gene_id "RI:1:86291485:86291862-86292684:86293367:-"; transcript_id "RI:1:86291485:86291862-86292684:86293367:-:alternative2";
1	hq_isoforms.fasta.no5merge.collapsed.gff	exon	86291485	86293367	.	-	.	gene_id "RI:1:86291485:86291862-86292684:86293367:-"; transcript_id "RI:1:86291485:86291862-86292684:86293367:-:alternative1";
1	hq_isoforms.fasta.no5merge.collapsed.gff	exon	86303288	86303433	.	-	.	gene_id "RI:1:86303288:86303433-86306055:86306161:-"; transcript_id "RI:1:86303288:86303433-86306055:86306161:-:alternative2";
1	hq_isoforms.fasta.no5merge.collapsed.gff	exon	86306055	86306161	.	-	.	gene_id "RI:1:86303288:86303433-86306055:86306161:-"; transcript_id "RI:1:86303288:86303433-86306055:86306161:-:alternative2";
1	hq_isoforms.fasta.no5merge.collapsed.gff	exon	86303288	86306161	.	-	.	gene_id "RI:1:86303288:86303433-86306055:86306161:-"; transcript_id "RI:1:86303288:86303433-86306055:86306161:-:alternative1";
1	hq_isoforms.fasta.no5merge.collapsed.gff	exon	86518825	86518905	.	-	.	gene_id "RI:1:86518825:86518905-86520711:86520895:-"; transcript_id "RI:1:86518825:86518905-86520711:86520895:-:alternative2";
1	hq_isoforms.fasta.no5merge.collapsed.gff	exon	86520711	86520895	.	-	.	gene_id "RI:1:86518825:86518905-86520711:86520895:-"; transcript_id "RI:1:86518825:86518905-86520711:86520895:-:alternative2";
1	hq_isoforms.fasta.no5merge.collapsed.gff	exon	86518825	86520895	.	-	.	gene_id "RI:1:86518825:86518905-86520711:86520895:-"; transcript_id "RI:1:86518825:86518905-86520711:86520895:-:alternative1";
1	hq_isoforms.fasta.no5merge.collapsed.gff	exon	86843496	86843554	.	-	.	gene_id "RI:1:86843496:86843554-86843676:86843711:-"; transcript_id "RI:1:86843496:86843554-86843676:86843711:-:alternative2";
1	hq_isoforms.fasta.no5merge.collapsed.gff	exon	86843676	86843711	.	-	.	gene_id "RI:1:86843496:86843554-86843676:86843711:-"; transcript_id "RI:1:86843496:86843554-86843676:86843711:-:alternative2";
1	hq_isoforms.fasta.no5merge.collapsed.gff	exon	86843496	86843711	.	-	.	gene_id "RI:1:86843496:86843554-86843676:86843711:-"; transcript_id "RI:1:86843496:86843554-86843676:86843711:-:alternative1";
1	hq_isoforms.fasta.no5merge.collapsed.gff	exon	86843496	86843711	.	-	.	gene_id "RI:1:86843496:86843711-86845693:86845774:-"; transcript_id "RI:1:86843496:86843711-86845693:86845774:-:alternative2";
1	hq_isoforms.fasta.no5merge.collapsed.gff	exon	86845693	86845774	.	-	.	gene_id "RI:1:86843496:86843711-86845693:86845774:-"; transcript_id "RI:1:86843496:86843711-86845693:86845774:-:alternative2";
1	hq_isoforms.fasta.no5merge.collapsed.gff	exon	86843496	86845774	.	-	.	gene_id "RI:1:86843496:86843711-86845693:86845774:-"; transcript_id "RI:1:86843496:86843711-86845693:86845774:-:alternative1";
1	hq_isoforms.fasta.no5merge.collapsed.gff	exon	86843496	86843554	.	-	.	gene_id "RI:1:86843496:86843554-86845693:86845774:-"; transcript_id "RI:1:86843496:86843554-86845693:86845774:-:alternative2";
1	hq_isoforms.fasta.no5merge.collapsed.gff	exon	86845693	86845774	.	-	.	gene_id "RI:1:86843496:86843554-86845693:86845774:-"; transcript_id "RI:1:86843496:86843554-86845693:86845774:-:alternative2";
1	hq_isoforms.fasta.no5merge.collapsed.gff	exon	86843496	86845774	.	-	.	gene_id "RI:1:86843496:86843554-86845693:86845774:-"; transcript_id "RI:1:86843496:86843554-86845693:86845774:-:alternative1";
1	hq_isoforms.fasta.no5merge.collapsed.gff	exon	86853018	86853113	.	-	.	gene_id "RI:1:86853018:86853113-86853516:86853647:-"; transcript_id "RI:1:86853018:86853113-86853516:86853647:-:alternative2";
1	hq_isoforms.fasta.no5merge.collapsed.gff	exon	86853516	86853647	.	-	.	gene_id "RI:1:86853018:86853113-86853516:86853647:-"; transcript_id "RI:1:86853018:86853113-86853516:86853647:-:alternative2";
1	hq_isoforms.fasta.no5merge.collapsed.gff	exon	86853018	86853647	.	-	.	gene_id "RI:1:86853018:86853113-86853516:86853647:-"; transcript_id "RI:1:86853018:86853113-86853516:86853647:-:alternative1";
1	hq_isoforms.fasta.no5merge.collapsed.gff	exon	86855135	86855234	.	-	.	gene_id "RI:1:86855135:86855234-86856133:86856269:-"; transcript_id "RI:1:86855135:86855234-86856133:86856269:-:alternative2";
1	hq_isoforms.fasta.no5merge.collapsed.gff	exon	86856133	86856269	.	-	.	gene_id "RI:1:86855135:86855234-86856133:86856269:-"; transcript_id "RI:1:86855135:86855234-86856133:86856269:-:alternative2";
1	hq_isoforms.fasta.no5merge.collapsed.gff	exon	86855135	86856269	.	-	.	gene_id "RI:1:86855135:86855234-86856133:86856269:-"; transcript_id "RI:1:86855135:86855234-86856133:86856269:-:alternative1";
1	hq_isoforms.fasta.no5merge.collapsed.gff	exon	86855135	86855234	.	-	.	gene_id "RI:1:86855135:86855234-86856090:86856269:-"; transcript_id "RI:1:86855135:86855234-86856090:86856269:-:alternative2";
1	hq_isoforms.fasta.no5merge.collapsed.gff	exon	86856090	86856269	.	-	.	gene_id "RI:1:86855135:86855234-86856090:86856269:-"; transcript_id "RI:1:86855135:86855234-86856090:86856269:-:alternative2";
1	hq_isoforms.fasta.no5merge.collapsed.gff	exon	86855135	86856269	.	-	.	gene_id "RI:1:86855135:86855234-86856090:86856269:-"; transcript_id "RI:1:86855135:86855234-86856090:86856269:-:alternative1";
1	hq_isoforms.fasta.no5merge.collapsed.gff	exon	87328518	87328655	.	-	.	gene_id "RI:1:87328518:87328655-87330769:87330859:-"; transcript_id "RI:1:87328518:87328655-87330769:87330859:-:alternative2";
1	hq_isoforms.fasta.no5merge.collapsed.gff	exon	87330769	87330859	.	-	.	gene_id "RI:1:87328518:87328655-87330769:87330859:-"; transcript_id "RI:1:87328518:87328655-87330769:87330859:-:alternative2";
1	hq_isoforms.fasta.no5merge.collapsed.gff	exon	87328518	87330859	.	-	.	gene_id "RI:1:87328518:87328655-87330769:87330859:-"; transcript_id "RI:1:87328518:87328655-87330769:87330859:-:alternative1";
1	hq_isoforms.fasta.no5merge.collapsed.gff	exon	87748293	87748355	.	-	.	gene_id "RI:1:87748293:87748355-87749481:87749532:-"; transcript_id "RI:1:87748293:87748355-87749481:87749532:-:alternative2";
1	hq_isoforms.fasta.no5merge.collapsed.gff	exon	87749481	87749532	.	-	.	gene_id "RI:1:87748293:87748355-87749481:87749532:-"; transcript_id "RI:1:87748293:87748355-87749481:87749532:-:alternative2";
1	hq_isoforms.fasta.no5merge.collapsed.gff	exon	87748293	87749532	.	-	.	gene_id "RI:1:87748293:87748355-87749481:87749532:-"; transcript_id "RI:1:87748293:87748355-87749481:87749532:-:alternative1";
1	hq_isoforms.fasta.no5merge.collapsed.gff	exon	87896049	87897633	.	-	.	gene_id "RI:1:87896049:87897633-87900083:87900144:-"; transcript_id "RI:1:87896049:87897633-87900083:87900144:-:alternative2";
1	hq_isoforms.fasta.no5merge.collapsed.gff	exon	87900083	87900144	.	-	.	gene_id "RI:1:87896049:87897633-87900083:87900144:-"; transcript_id "RI:1:87896049:87897633-87900083:87900144:-:alternative2";
1	hq_isoforms.fasta.no5merge.collapsed.gff	exon	87896049	87900144	.	-	.	gene_id "RI:1:87896049:87897633-87900083:87900144:-"; transcript_id "RI:1:87896049:87897633-87900083:87900144:-:alternative1";
1	hq_isoforms.fasta.no5merge.collapsed.gff	exon	87905489	87905626	.	-	.	gene_id "RI:1:87905489:87905626-87906533:87906778:-"; transcript_id "RI:1:87905489:87905626-87906533:87906778:-:alternative2";
1	hq_isoforms.fasta.no5merge.collapsed.gff	exon	87906533	87906778	.	-	.	gene_id "RI:1:87905489:87905626-87906533:87906778:-"; transcript_id "RI:1:87905489:87905626-87906533:87906778:-:alternative2";
1	hq_isoforms.fasta.no5merge.collapsed.gff	exon	87905489	87906778	.	-	.	gene_id "RI:1:87905489:87905626-87906533:87906778:-"; transcript_id "RI:1:87905489:87905626-87906533:87906778:-:alternative1";
1	hq_isoforms.fasta.no5merge.collapsed.gff	exon	87905489	87905626	.	-	.	gene_id "RI:1:87905489:87905626-87906497:87906778:-"; transcript_id "RI:1:87905489:87905626-87906497:87906778:-:alternative2";
1	hq_isoforms.fasta.no5merge.collapsed.gff	exon	87906497	87906778	.	-	.	gene_id "RI:1:87905489:87905626-87906497:87906778:-"; transcript_id "RI:1:87905489:87905626-87906497:87906778:-:alternative2";
1	hq_isoforms.fasta.no5merge.collapsed.gff	exon	87905489	87906778	.	-	.	gene_id "RI:1:87905489:87905626-87906497:87906778:-"; transcript_id "RI:1:87905489:87905626-87906497:87906778:-:alternative1";
1	hq_isoforms.fasta.no5merge.collapsed.gff	exon	87905489	87905626	.	-	.	gene_id "RI:1:87905489:87905626-87906530:87906778:-"; transcript_id "RI:1:87905489:87905626-87906530:87906778:-:alternative2";
1	hq_isoforms.fasta.no5merge.collapsed.gff	exon	87906530	87906778	.	-	.	gene_id "RI:1:87905489:87905626-87906530:87906778:-"; transcript_id "RI:1:87905489:87905626-87906530:87906778:-:alternative2";
1	hq_isoforms.fasta.no5merge.collapsed.gff	exon	87905489	87906778	.	-	.	gene_id "RI:1:87905489:87905626-87906530:87906778:-"; transcript_id "RI:1:87905489:87905626-87906530:87906778:-:alternative1";
1	hq_isoforms.fasta.no5merge.collapsed.gff	exon	87910708	87910896	.	-	.	gene_id "RI:1:87910708:87910896-87912666:87912876:-"; transcript_id "RI:1:87910708:87910896-87912666:87912876:-:alternative2";
1	hq_isoforms.fasta.no5merge.collapsed.gff	exon	87912666	87912876	.	-	.	gene_id "RI:1:87910708:87910896-87912666:87912876:-"; transcript_id "RI:1:87910708:87910896-87912666:87912876:-:alternative2";
1	hq_isoforms.fasta.no5merge.collapsed.gff	exon	87910708	87912876	.	-	.	gene_id "RI:1:87910708:87910896-87912666:87912876:-"; transcript_id "RI:1:87910708:87910896-87912666:87912876:-:alternative1";
1	hq_isoforms.fasta.no5merge.collapsed.gff	exon	88210365	88211128	.	-	.	gene_id "RI:1:88210365:88211128-88211566:88211668:-"; transcript_id "RI:1:88210365:88211128-88211566:88211668:-:alternative2";
1	hq_isoforms.fasta.no5merge.collapsed.gff	exon	88211566	88211668	.	-	.	gene_id "RI:1:88210365:88211128-88211566:88211668:-"; transcript_id "RI:1:88210365:88211128-88211566:88211668:-:alternative2";
1	hq_isoforms.fasta.no5merge.collapsed.gff	exon	88210365	88211668	.	-	.	gene_id "RI:1:88210365:88211128-88211566:88211668:-"; transcript_id "RI:1:88210365:88211128-88211566:88211668:-:alternative1";
1	hq_isoforms.fasta.no5merge.collapsed.gff	exon	89466024	89466161	.	-	.	gene_id "RI:1:89466024:89466161-89468142:89468263:-"; transcript_id "RI:1:89466024:89466161-89468142:89468263:-:alternative2";
1	hq_isoforms.fasta.no5merge.collapsed.gff	exon	89468142	89468263	.	-	.	gene_id "RI:1:89466024:89466161-89468142:89468263:-"; transcript_id "RI:1:89466024:89466161-89468142:89468263:-:alternative2";
1	hq_isoforms.fasta.no5merge.collapsed.gff	exon	89466024	89468263	.	-	.	gene_id "RI:1:89466024:89466161-89468142:89468263:-"; transcript_id "RI:1:89466024:89466161-89468142:89468263:-:alternative1";
1	hq_isoforms.fasta.no5merge.collapsed.gff	exon	89464447	89464534	.	-	.	gene_id "RI:1:89464447:89464534-89466024:89468263:-"; transcript_id "RI:1:89464447:89464534-89466024:89468263:-:alternative2";
1	hq_isoforms.fasta.no5merge.collapsed.gff	exon	89466024	89468263	.	-	.	gene_id "RI:1:89464447:89464534-89466024:89468263:-"; transcript_id "RI:1:89464447:89464534-89466024:89468263:-:alternative2";
1	hq_isoforms.fasta.no5merge.collapsed.gff	exon	89464447	89468263	.	-	.	gene_id "RI:1:89464447:89464534-89466024:89468263:-"; transcript_id "RI:1:89464447:89464534-89466024:89468263:-:alternative1";
1	hq_isoforms.fasta.no5merge.collapsed.gff	exon	90100447	90102442	.	-	.	gene_id "RI:1:90100447:90102442-90104672:90105048:-"; transcript_id "RI:1:90100447:90102442-90104672:90105048:-:alternative2";
1	hq_isoforms.fasta.no5merge.collapsed.gff	exon	90104672	90105048	.	-	.	gene_id "RI:1:90100447:90102442-90104672:90105048:-"; transcript_id "RI:1:90100447:90102442-90104672:90105048:-:alternative2";
1	hq_isoforms.fasta.no5merge.collapsed.gff	exon	90100447	90105048	.	-	.	gene_id "RI:1:90100447:90102442-90104672:90105048:-"; transcript_id "RI:1:90100447:90102442-90104672:90105048:-:alternative1";
1	hq_isoforms.fasta.no5merge.collapsed.gff	exon	90170092	90170116	.	-	.	gene_id "RI:1:90170092:90170116-90172352:90172383:-"; transcript_id "RI:1:90170092:90170116-90172352:90172383:-:alternative2";
1	hq_isoforms.fasta.no5merge.collapsed.gff	exon	90172352	90172383	.	-	.	gene_id "RI:1:90170092:90170116-90172352:90172383:-"; transcript_id "RI:1:90170092:90170116-90172352:90172383:-:alternative2";
1	hq_isoforms.fasta.no5merge.collapsed.gff	exon	90170092	90172383	.	-	.	gene_id "RI:1:90170092:90170116-90172352:90172383:-"; transcript_id "RI:1:90170092:90170116-90172352:90172383:-:alternative1";
1	hq_isoforms.fasta.no5merge.collapsed.gff	exon	90170092	90170221	.	-	.	gene_id "RI:1:90170092:90170221-90172352:90172383:-"; transcript_id "RI:1:90170092:90170221-90172352:90172383:-:alternative2";
1	hq_isoforms.fasta.no5merge.collapsed.gff	exon	90172352	90172383	.	-	.	gene_id "RI:1:90170092:90170221-90172352:90172383:-"; transcript_id "RI:1:90170092:90170221-90172352:90172383:-:alternative2";
1	hq_isoforms.fasta.no5merge.collapsed.gff	exon	90170092	90172383	.	-	.	gene_id "RI:1:90170092:90170221-90172352:90172383:-"; transcript_id "RI:1:90170092:90170221-90172352:90172383:-:alternative1";
1	hq_isoforms.fasta.no5merge.collapsed.gff	exon	90167634	90170116	.	-	.	gene_id "RI:1:90167634:90170116-90172352:90172383:-"; transcript_id "RI:1:90167634:90170116-90172352:90172383:-:alternative2";
1	hq_isoforms.fasta.no5merge.collapsed.gff	exon	90172352	90172383	.	-	.	gene_id "RI:1:90167634:90170116-90172352:90172383:-"; transcript_id "RI:1:90167634:90170116-90172352:90172383:-:alternative2";
1	hq_isoforms.fasta.no5merge.collapsed.gff	exon	90167634	90172383	.	-	.	gene_id "RI:1:90167634:90170116-90172352:90172383:-"; transcript_id "RI:1:90167634:90170116-90172352:90172383:-:alternative1";
1	hq_isoforms.fasta.no5merge.collapsed.gff	exon	90164640	90166966	.	-	.	gene_id "RI:1:90164640:90166966-90169475:90169502:-"; transcript_id "RI:1:90164640:90166966-90169475:90169502:-:alternative2";
1	hq_isoforms.fasta.no5merge.collapsed.gff	exon	90169475	90169502	.	-	.	gene_id "RI:1:90164640:90166966-90169475:90169502:-"; transcript_id "RI:1:90164640:90166966-90169475:90169502:-:alternative2";
1	hq_isoforms.fasta.no5merge.collapsed.gff	exon	90164640	90169502	.	-	.	gene_id "RI:1:90164640:90166966-90169475:90169502:-"; transcript_id "RI:1:90164640:90166966-90169475:90169502:-:alternative1";
1	hq_isoforms.fasta.no5merge.collapsed.gff	exon	90212419	90212487	.	-	.	gene_id "RI:1:90212419:90212487-90215716:90215806:-"; transcript_id "RI:1:90212419:90212487-90215716:90215806:-:alternative2";
1	hq_isoforms.fasta.no5merge.collapsed.gff	exon	90215716	90215806	.	-	.	gene_id "RI:1:90212419:90212487-90215716:90215806:-"; transcript_id "RI:1:90212419:90212487-90215716:90215806:-:alternative2";
1	hq_isoforms.fasta.no5merge.collapsed.gff	exon	90212419	90215806	.	-	.	gene_id "RI:1:90212419:90212487-90215716:90215806:-"; transcript_id "RI:1:90212419:90212487-90215716:90215806:-:alternative1";
1	hq_isoforms.fasta.no5merge.collapsed.gff	exon	91862319	91862512	.	-	.	gene_id "RI:1:91862319:91862512-91864486:91864635:-"; transcript_id "RI:1:91862319:91862512-91864486:91864635:-:alternative2";
1	hq_isoforms.fasta.no5merge.collapsed.gff	exon	91864486	91864635	.	-	.	gene_id "RI:1:91862319:91862512-91864486:91864635:-"; transcript_id "RI:1:91862319:91862512-91864486:91864635:-:alternative2";
1	hq_isoforms.fasta.no5merge.collapsed.gff	exon	91862319	91864635	.	-	.	gene_id "RI:1:91862319:91862512-91864486:91864635:-"; transcript_id "RI:1:91862319:91862512-91864486:91864635:-:alternative1";
1	hq_isoforms.fasta.no5merge.collapsed.gff	exon	92642153	92644060	.	-	.	gene_id "RI:1:92642153:92644060-92644062:92644070:-"; transcript_id "RI:1:92642153:92644060-92644062:92644070:-:alternative2";
1	hq_isoforms.fasta.no5merge.collapsed.gff	exon	92644062	92644070	.	-	.	gene_id "RI:1:92642153:92644060-92644062:92644070:-"; transcript_id "RI:1:92642153:92644060-92644062:92644070:-:alternative2";
1	hq_isoforms.fasta.no5merge.collapsed.gff	exon	92642153	92644070	.	-	.	gene_id "RI:1:92642153:92644060-92644062:92644070:-"; transcript_id "RI:1:92642153:92644060-92644062:92644070:-:alternative1";
1	hq_isoforms.fasta.no5merge.collapsed.gff	exon	92703345	92704061	.	-	.	gene_id "RI:1:92703345:92704061-92704170:92704693:-"; transcript_id "RI:1:92703345:92704061-92704170:92704693:-:alternative2";
1	hq_isoforms.fasta.no5merge.collapsed.gff	exon	92704170	92704693	.	-	.	gene_id "RI:1:92703345:92704061-92704170:92704693:-"; transcript_id "RI:1:92703345:92704061-92704170:92704693:-:alternative2";
1	hq_isoforms.fasta.no5merge.collapsed.gff	exon	92703345	92704693	.	-	.	gene_id "RI:1:92703345:92704061-92704170:92704693:-"; transcript_id "RI:1:92703345:92704061-92704170:92704693:-:alternative1";
1	hq_isoforms.fasta.no5merge.collapsed.gff	exon	92655091	92655176	.	-	.	gene_id "RI:1:92655091:92655176-92658493:92658712:-"; transcript_id "RI:1:92655091:92655176-92658493:92658712:-:alternative2";
1	hq_isoforms.fasta.no5merge.collapsed.gff	exon	92658493	92658712	.	-	.	gene_id "RI:1:92655091:92655176-92658493:92658712:-"; transcript_id "RI:1:92655091:92655176-92658493:92658712:-:alternative2";
1	hq_isoforms.fasta.no5merge.collapsed.gff	exon	92655091	92658712	.	-	.	gene_id "RI:1:92655091:92655176-92658493:92658712:-"; transcript_id "RI:1:92655091:92655176-92658493:92658712:-:alternative1";
1	hq_isoforms.fasta.no5merge.collapsed.gff	exon	92672013	92672153	.	-	.	gene_id "RI:1:92672013:92672153-92673840:92673983:-"; transcript_id "RI:1:92672013:92672153-92673840:92673983:-:alternative2";
1	hq_isoforms.fasta.no5merge.collapsed.gff	exon	92673840	92673983	.	-	.	gene_id "RI:1:92672013:92672153-92673840:92673983:-"; transcript_id "RI:1:92672013:92672153-92673840:92673983:-:alternative2";
1	hq_isoforms.fasta.no5merge.collapsed.gff	exon	92672013	92673983	.	-	.	gene_id "RI:1:92672013:92672153-92673840:92673983:-"; transcript_id "RI:1:92672013:92672153-92673840:92673983:-:alternative1";
1	hq_isoforms.fasta.no5merge.collapsed.gff	exon	92692637	92692780	.	-	.	gene_id "RI:1:92692637:92692780-92695048:92695431:-"; transcript_id "RI:1:92692637:92692780-92695048:92695431:-:alternative2";
1	hq_isoforms.fasta.no5merge.collapsed.gff	exon	92695048	92695431	.	-	.	gene_id "RI:1:92692637:92692780-92695048:92695431:-"; transcript_id "RI:1:92692637:92692780-92695048:92695431:-:alternative2";
1	hq_isoforms.fasta.no5merge.collapsed.gff	exon	92692637	92695431	.	-	.	gene_id "RI:1:92692637:92692780-92695048:92695431:-"; transcript_id "RI:1:92692637:92692780-92695048:92695431:-:alternative1";
1	hq_isoforms.fasta.no5merge.collapsed.gff	exon	93053898	93054015	.	-	.	gene_id "RI:1:93053898:93054015-93055921:93056217:-"; transcript_id "RI:1:93053898:93054015-93055921:93056217:-:alternative2";
1	hq_isoforms.fasta.no5merge.collapsed.gff	exon	93055921	93056217	.	-	.	gene_id "RI:1:93053898:93054015-93055921:93056217:-"; transcript_id "RI:1:93053898:93054015-93055921:93056217:-:alternative2";
1	hq_isoforms.fasta.no5merge.collapsed.gff	exon	93053898	93056217	.	-	.	gene_id "RI:1:93053898:93054015-93055921:93056217:-"; transcript_id "RI:1:93053898:93054015-93055921:93056217:-:alternative1";
1	hq_isoforms.fasta.no5merge.collapsed.gff	exon	93816726	93816758	.	-	.	gene_id "RI:1:93816726:93816758-93817388:93817480:-"; transcript_id "RI:1:93816726:93816758-93817388:93817480:-:alternative2";
1	hq_isoforms.fasta.no5merge.collapsed.gff	exon	93817388	93817480	.	-	.	gene_id "RI:1:93816726:93816758-93817388:93817480:-"; transcript_id "RI:1:93816726:93816758-93817388:93817480:-:alternative2";
1	hq_isoforms.fasta.no5merge.collapsed.gff	exon	93816726	93817480	.	-	.	gene_id "RI:1:93816726:93816758-93817388:93817480:-"; transcript_id "RI:1:93816726:93816758-93817388:93817480:-:alternative1";
1	hq_isoforms.fasta.no5merge.collapsed.gff	exon	93825977	93826156	.	-	.	gene_id "RI:1:93825977:93826156-93827458:93827590:-"; transcript_id "RI:1:93825977:93826156-93827458:93827590:-:alternative2";
1	hq_isoforms.fasta.no5merge.collapsed.gff	exon	93827458	93827590	.	-	.	gene_id "RI:1:93825977:93826156-93827458:93827590:-"; transcript_id "RI:1:93825977:93826156-93827458:93827590:-:alternative2";
1	hq_isoforms.fasta.no5merge.collapsed.gff	exon	93825977	93827590	.	-	.	gene_id "RI:1:93825977:93826156-93827458:93827590:-"; transcript_id "RI:1:93825977:93826156-93827458:93827590:-:alternative1";
1	hq_isoforms.fasta.no5merge.collapsed.gff	exon	93829426	93829494	.	-	.	gene_id "RI:1:93829426:93829494-93831192:93831277:-"; transcript_id "RI:1:93829426:93829494-93831192:93831277:-:alternative2";
1	hq_isoforms.fasta.no5merge.collapsed.gff	exon	93831192	93831277	.	-	.	gene_id "RI:1:93829426:93829494-93831192:93831277:-"; transcript_id "RI:1:93829426:93829494-93831192:93831277:-:alternative2";
1	hq_isoforms.fasta.no5merge.collapsed.gff	exon	93829426	93831277	.	-	.	gene_id "RI:1:93829426:93829494-93831192:93831277:-"; transcript_id "RI:1:93829426:93829494-93831192:93831277:-:alternative1";
1	hq_isoforms.fasta.no5merge.collapsed.gff	exon	93829426	93829491	.	-	.	gene_id "RI:1:93829426:93829491-93831188:93831277:-"; transcript_id "RI:1:93829426:93829491-93831188:93831277:-:alternative2";
1	hq_isoforms.fasta.no5merge.collapsed.gff	exon	93831188	93831277	.	-	.	gene_id "RI:1:93829426:93829491-93831188:93831277:-"; transcript_id "RI:1:93829426:93829491-93831188:93831277:-:alternative2";
1	hq_isoforms.fasta.no5merge.collapsed.gff	exon	93829426	93831277	.	-	.	gene_id "RI:1:93829426:93829491-93831188:93831277:-"; transcript_id "RI:1:93829426:93829491-93831188:93831277:-:alternative1";
1	hq_isoforms.fasta.no5merge.collapsed.gff	exon	93824519	93824689	.	-	.	gene_id "RI:1:93824519:93824689-93825977:93827590:-"; transcript_id "RI:1:93824519:93824689-93825977:93827590:-:alternative2";
1	hq_isoforms.fasta.no5merge.collapsed.gff	exon	93825977	93827590	.	-	.	gene_id "RI:1:93824519:93824689-93825977:93827590:-"; transcript_id "RI:1:93824519:93824689-93825977:93827590:-:alternative2";
1	hq_isoforms.fasta.no5merge.collapsed.gff	exon	93824519	93827590	.	-	.	gene_id "RI:1:93824519:93824689-93825977:93827590:-"; transcript_id "RI:1:93824519:93824689-93825977:93827590:-:alternative1";
1	hq_isoforms.fasta.no5merge.collapsed.gff	exon	94243864	94244302	.	-	.	gene_id "RI:1:94243864:94244302-94245892:94245997:-"; transcript_id "RI:1:94243864:94244302-94245892:94245997:-:alternative2";
1	hq_isoforms.fasta.no5merge.collapsed.gff	exon	94245892	94245997	.	-	.	gene_id "RI:1:94243864:94244302-94245892:94245997:-"; transcript_id "RI:1:94243864:94244302-94245892:94245997:-:alternative2";
1	hq_isoforms.fasta.no5merge.collapsed.gff	exon	94243864	94245997	.	-	.	gene_id "RI:1:94243864:94244302-94245892:94245997:-"; transcript_id "RI:1:94243864:94244302-94245892:94245997:-:alternative1";
1	hq_isoforms.fasta.no5merge.collapsed.gff	exon	94344815	94344888	.	-	.	gene_id "RI:1:94344815:94344888-94346463:94346595:-"; transcript_id "RI:1:94344815:94344888-94346463:94346595:-:alternative2";
1	hq_isoforms.fasta.no5merge.collapsed.gff	exon	94346463	94346595	.	-	.	gene_id "RI:1:94344815:94344888-94346463:94346595:-"; transcript_id "RI:1:94344815:94344888-94346463:94346595:-:alternative2";
1	hq_isoforms.fasta.no5merge.collapsed.gff	exon	94344815	94346595	.	-	.	gene_id "RI:1:94344815:94344888-94346463:94346595:-"; transcript_id "RI:1:94344815:94344888-94346463:94346595:-:alternative1";
1	hq_isoforms.fasta.no5merge.collapsed.gff	exon	94353874	94354087	.	-	.	gene_id "RI:1:94353874:94354087-94355436:94355596:-"; transcript_id "RI:1:94353874:94354087-94355436:94355596:-:alternative2";
1	hq_isoforms.fasta.no5merge.collapsed.gff	exon	94355436	94355596	.	-	.	gene_id "RI:1:94353874:94354087-94355436:94355596:-"; transcript_id "RI:1:94353874:94354087-94355436:94355596:-:alternative2";
1	hq_isoforms.fasta.no5merge.collapsed.gff	exon	94353874	94355596	.	-	.	gene_id "RI:1:94353874:94354087-94355436:94355596:-"; transcript_id "RI:1:94353874:94354087-94355436:94355596:-:alternative1";
1	hq_isoforms.fasta.no5merge.collapsed.gff	exon	94353874	94354078	.	-	.	gene_id "RI:1:94353874:94354078-94355444:94355596:-"; transcript_id "RI:1:94353874:94354078-94355444:94355596:-:alternative2";
1	hq_isoforms.fasta.no5merge.collapsed.gff	exon	94355444	94355596	.	-	.	gene_id "RI:1:94353874:94354078-94355444:94355596:-"; transcript_id "RI:1:94353874:94354078-94355444:94355596:-:alternative2";
1	hq_isoforms.fasta.no5merge.collapsed.gff	exon	94353874	94355596	.	-	.	gene_id "RI:1:94353874:94354078-94355444:94355596:-"; transcript_id "RI:1:94353874:94354078-94355444:94355596:-:alternative1";
1	hq_isoforms.fasta.no5merge.collapsed.gff	exon	94353874	94354087	.	-	.	gene_id "RI:1:94353874:94354087-94354615:94355596:-"; transcript_id "RI:1:94353874:94354087-94354615:94355596:-:alternative2";
1	hq_isoforms.fasta.no5merge.collapsed.gff	exon	94354615	94355596	.	-	.	gene_id "RI:1:94353874:94354087-94354615:94355596:-"; transcript_id "RI:1:94353874:94354087-94354615:94355596:-:alternative2";
1	hq_isoforms.fasta.no5merge.collapsed.gff	exon	94353874	94355596	.	-	.	gene_id "RI:1:94353874:94354087-94354615:94355596:-"; transcript_id "RI:1:94353874:94354087-94354615:94355596:-:alternative1";
1	hq_isoforms.fasta.no5merge.collapsed.gff	exon	94353874	94354064	.	-	.	gene_id "RI:1:94353874:94354064-94355436:94355596:-"; transcript_id "RI:1:94353874:94354064-94355436:94355596:-:alternative2";
1	hq_isoforms.fasta.no5merge.collapsed.gff	exon	94355436	94355596	.	-	.	gene_id "RI:1:94353874:94354064-94355436:94355596:-"; transcript_id "RI:1:94353874:94354064-94355436:94355596:-:alternative2";
1	hq_isoforms.fasta.no5merge.collapsed.gff	exon	94353874	94355596	.	-	.	gene_id "RI:1:94353874:94354064-94355436:94355596:-"; transcript_id "RI:1:94353874:94354064-94355436:94355596:-:alternative1";
1	hq_isoforms.fasta.no5merge.collapsed.gff	exon	95149095	95150285	.	-	.	gene_id "RI:1:95149095:95150285-95151254:95151321:-"; transcript_id "RI:1:95149095:95150285-95151254:95151321:-:alternative2";
1	hq_isoforms.fasta.no5merge.collapsed.gff	exon	95151254	95151321	.	-	.	gene_id "RI:1:95149095:95150285-95151254:95151321:-"; transcript_id "RI:1:95149095:95150285-95151254:95151321:-:alternative2";
1	hq_isoforms.fasta.no5merge.collapsed.gff	exon	95149095	95151321	.	-	.	gene_id "RI:1:95149095:95150285-95151254:95151321:-"; transcript_id "RI:1:95149095:95150285-95151254:95151321:-:alternative1";
1	hq_isoforms.fasta.no5merge.collapsed.gff	exon	95149095	95149205	.	-	.	gene_id "RI:1:95149095:95149205-95150207:95150285:-"; transcript_id "RI:1:95149095:95149205-95150207:95150285:-:alternative2";
1	hq_isoforms.fasta.no5merge.collapsed.gff	exon	95150207	95150285	.	-	.	gene_id "RI:1:95149095:95149205-95150207:95150285:-"; transcript_id "RI:1:95149095:95149205-95150207:95150285:-:alternative2";
1	hq_isoforms.fasta.no5merge.collapsed.gff	exon	95149095	95150285	.	-	.	gene_id "RI:1:95149095:95149205-95150207:95150285:-"; transcript_id "RI:1:95149095:95149205-95150207:95150285:-:alternative1";
1	hq_isoforms.fasta.no5merge.collapsed.gff	exon	95158113	95158280	.	-	.	gene_id "RI:1:95158113:95158280-95160582:95160640:-"; transcript_id "RI:1:95158113:95158280-95160582:95160640:-:alternative2";
1	hq_isoforms.fasta.no5merge.collapsed.gff	exon	95160582	95160640	.	-	.	gene_id "RI:1:95158113:95158280-95160582:95160640:-"; transcript_id "RI:1:95158113:95158280-95160582:95160640:-:alternative2";
1	hq_isoforms.fasta.no5merge.collapsed.gff	exon	95158113	95160640	.	-	.	gene_id "RI:1:95158113:95158280-95160582:95160640:-"; transcript_id "RI:1:95158113:95158280-95160582:95160640:-:alternative1";
1	hq_isoforms.fasta.no5merge.collapsed.gff	exon	95279747	95281946	.	-	.	gene_id "RI:1:95279747:95281946-95282642:95282687:-"; transcript_id "RI:1:95279747:95281946-95282642:95282687:-:alternative2";
1	hq_isoforms.fasta.no5merge.collapsed.gff	exon	95282642	95282687	.	-	.	gene_id "RI:1:95279747:95281946-95282642:95282687:-"; transcript_id "RI:1:95279747:95281946-95282642:95282687:-:alternative2";
1	hq_isoforms.fasta.no5merge.collapsed.gff	exon	95279747	95282687	.	-	.	gene_id "RI:1:95279747:95281946-95282642:95282687:-"; transcript_id "RI:1:95279747:95281946-95282642:95282687:-:alternative1";
1	hq_isoforms.fasta.no5merge.collapsed.gff	exon	97964451	97966015	.	-	.	gene_id "RI:1:97964451:97966015-97966116:97970012:-"; transcript_id "RI:1:97964451:97966015-97966116:97970012:-:alternative2";
1	hq_isoforms.fasta.no5merge.collapsed.gff	exon	97966116	97970012	.	-	.	gene_id "RI:1:97964451:97966015-97966116:97970012:-"; transcript_id "RI:1:97964451:97966015-97966116:97970012:-:alternative2";
1	hq_isoforms.fasta.no5merge.collapsed.gff	exon	97964451	97970012	.	-	.	gene_id "RI:1:97964451:97966015-97966116:97970012:-"; transcript_id "RI:1:97964451:97966015-97966116:97970012:-:alternative1";
1	hq_isoforms.fasta.no5merge.collapsed.gff	exon	107178595	107178796	.	-	.	gene_id "RI:1:107178595:107178796-107179486:107179636:-"; transcript_id "RI:1:107178595:107178796-107179486:107179636:-:alternative2";
1	hq_isoforms.fasta.no5merge.collapsed.gff	exon	107179486	107179636	.	-	.	gene_id "RI:1:107178595:107178796-107179486:107179636:-"; transcript_id "RI:1:107178595:107178796-107179486:107179636:-:alternative2";
1	hq_isoforms.fasta.no5merge.collapsed.gff	exon	107178595	107179636	.	-	.	gene_id "RI:1:107178595:107178796-107179486:107179636:-"; transcript_id "RI:1:107178595:107178796-107179486:107179636:-:alternative1";
1	hq_isoforms.fasta.no5merge.collapsed.gff	exon	107180123	107180362	.	-	.	gene_id "RI:1:107180123:107180362-107181092:107183212:-"; transcript_id "RI:1:107180123:107180362-107181092:107183212:-:alternative2";
1	hq_isoforms.fasta.no5merge.collapsed.gff	exon	107181092	107183212	.	-	.	gene_id "RI:1:107180123:107180362-107181092:107183212:-"; transcript_id "RI:1:107180123:107180362-107181092:107183212:-:alternative2";
1	hq_isoforms.fasta.no5merge.collapsed.gff	exon	107180123	107183212	.	-	.	gene_id "RI:1:107180123:107180362-107181092:107183212:-"; transcript_id "RI:1:107180123:107180362-107181092:107183212:-:alternative1";
1	hq_isoforms.fasta.no5merge.collapsed.gff	exon	107181092	107181284	.	-	.	gene_id "RI:1:107181092:107181284-107181778:107183212:-"; transcript_id "RI:1:107181092:107181284-107181778:107183212:-:alternative2";
1	hq_isoforms.fasta.no5merge.collapsed.gff	exon	107181778	107183212	.	-	.	gene_id "RI:1:107181092:107181284-107181778:107183212:-"; transcript_id "RI:1:107181092:107181284-107181778:107183212:-:alternative2";
1	hq_isoforms.fasta.no5merge.collapsed.gff	exon	107181092	107183212	.	-	.	gene_id "RI:1:107181092:107181284-107181778:107183212:-"; transcript_id "RI:1:107181092:107181284-107181778:107183212:-:alternative1";
1	hq_isoforms.fasta.no5merge.collapsed.gff	exon	107181778	107181819	.	-	.	gene_id "RI:1:107181778:107181819-107182424:107183212:-"; transcript_id "RI:1:107181778:107181819-107182424:107183212:-:alternative2";
1	hq_isoforms.fasta.no5merge.collapsed.gff	exon	107182424	107183212	.	-	.	gene_id "RI:1:107181778:107181819-107182424:107183212:-"; transcript_id "RI:1:107181778:107181819-107182424:107183212:-:alternative2";
1	hq_isoforms.fasta.no5merge.collapsed.gff	exon	107181778	107183212	.	-	.	gene_id "RI:1:107181778:107181819-107182424:107183212:-"; transcript_id "RI:1:107181778:107181819-107182424:107183212:-:alternative1";
1	hq_isoforms.fasta.no5merge.collapsed.gff	exon	107187467	107187519	.	-	.	gene_id "RI:1:107187467:107187519-107188152:107188382:-"; transcript_id "RI:1:107187467:107187519-107188152:107188382:-:alternative2";
1	hq_isoforms.fasta.no5merge.collapsed.gff	exon	107188152	107188382	.	-	.	gene_id "RI:1:107187467:107187519-107188152:107188382:-"; transcript_id "RI:1:107187467:107187519-107188152:107188382:-:alternative2";
1	hq_isoforms.fasta.no5merge.collapsed.gff	exon	107187467	107188382	.	-	.	gene_id "RI:1:107187467:107187519-107188152:107188382:-"; transcript_id "RI:1:107187467:107187519-107188152:107188382:-:alternative1";
1	hq_isoforms.fasta.no5merge.collapsed.gff	exon	107207676	107208948	.	-	.	gene_id "RI:1:107207676:107208948-107209820:107209911:-"; transcript_id "RI:1:107207676:107208948-107209820:107209911:-:alternative2";
1	hq_isoforms.fasta.no5merge.collapsed.gff	exon	107209820	107209911	.	-	.	gene_id "RI:1:107207676:107208948-107209820:107209911:-"; transcript_id "RI:1:107207676:107208948-107209820:107209911:-:alternative2";
1	hq_isoforms.fasta.no5merge.collapsed.gff	exon	107207676	107209911	.	-	.	gene_id "RI:1:107207676:107208948-107209820:107209911:-"; transcript_id "RI:1:107207676:107208948-107209820:107209911:-:alternative1";
1	hq_isoforms.fasta.no5merge.collapsed.gff	exon	107218361	107218585	.	-	.	gene_id "RI:1:107218361:107218585-107219757:107219876:-"; transcript_id "RI:1:107218361:107218585-107219757:107219876:-:alternative2";
1	hq_isoforms.fasta.no5merge.collapsed.gff	exon	107219757	107219876	.	-	.	gene_id "RI:1:107218361:107218585-107219757:107219876:-"; transcript_id "RI:1:107218361:107218585-107219757:107219876:-:alternative2";
1	hq_isoforms.fasta.no5merge.collapsed.gff	exon	107218361	107219876	.	-	.	gene_id "RI:1:107218361:107218585-107219757:107219876:-"; transcript_id "RI:1:107218361:107218585-107219757:107219876:-:alternative1";
1	hq_isoforms.fasta.no5merge.collapsed.gff	exon	107222098	107222185	.	-	.	gene_id "RI:1:107222098:107222185-107222266:107222332:-"; transcript_id "RI:1:107222098:107222185-107222266:107222332:-:alternative2";
1	hq_isoforms.fasta.no5merge.collapsed.gff	exon	107222266	107222332	.	-	.	gene_id "RI:1:107222098:107222185-107222266:107222332:-"; transcript_id "RI:1:107222098:107222185-107222266:107222332:-:alternative2";
1	hq_isoforms.fasta.no5merge.collapsed.gff	exon	107222098	107222332	.	-	.	gene_id "RI:1:107222098:107222185-107222266:107222332:-"; transcript_id "RI:1:107222098:107222185-107222266:107222332:-:alternative1";
1	hq_isoforms.fasta.no5merge.collapsed.gff	exon	108594214	108594306	.	-	.	gene_id "RI:1:108594214:108594306-108595453:108595520:-"; transcript_id "RI:1:108594214:108594306-108595453:108595520:-:alternative2";
1	hq_isoforms.fasta.no5merge.collapsed.gff	exon	108595453	108595520	.	-	.	gene_id "RI:1:108594214:108594306-108595453:108595520:-"; transcript_id "RI:1:108594214:108594306-108595453:108595520:-:alternative2";
1	hq_isoforms.fasta.no5merge.collapsed.gff	exon	108594214	108595520	.	-	.	gene_id "RI:1:108594214:108594306-108595453:108595520:-"; transcript_id "RI:1:108594214:108594306-108595453:108595520:-:alternative1";
1	hq_isoforms.fasta.no5merge.collapsed.gff	exon	108109906	108109999	.	-	.	gene_id "RI:1:108109906:108109999-108110759:108110881:-"; transcript_id "RI:1:108109906:108109999-108110759:108110881:-:alternative2";
1	hq_isoforms.fasta.no5merge.collapsed.gff	exon	108110759	108110881	.	-	.	gene_id "RI:1:108109906:108109999-108110759:108110881:-"; transcript_id "RI:1:108109906:108109999-108110759:108110881:-:alternative2";
1	hq_isoforms.fasta.no5merge.collapsed.gff	exon	108109906	108110881	.	-	.	gene_id "RI:1:108109906:108109999-108110759:108110881:-"; transcript_id "RI:1:108109906:108109999-108110759:108110881:-:alternative1";
1	hq_isoforms.fasta.no5merge.collapsed.gff	exon	108109906	108110035	.	-	.	gene_id "RI:1:108109906:108110035-108110759:108110881:-"; transcript_id "RI:1:108109906:108110035-108110759:108110881:-:alternative2";
1	hq_isoforms.fasta.no5merge.collapsed.gff	exon	108110759	108110881	.	-	.	gene_id "RI:1:108109906:108110035-108110759:108110881:-"; transcript_id "RI:1:108109906:108110035-108110759:108110881:-:alternative2";
1	hq_isoforms.fasta.no5merge.collapsed.gff	exon	108109906	108110881	.	-	.	gene_id "RI:1:108109906:108110035-108110759:108110881:-"; transcript_id "RI:1:108109906:108110035-108110759:108110881:-:alternative1";
1	hq_isoforms.fasta.no5merge.collapsed.gff	exon	108111039	108111105	.	-	.	gene_id "RI:1:108111039:108111105-108111183:108111420:-"; transcript_id "RI:1:108111039:108111105-108111183:108111420:-:alternative2";
1	hq_isoforms.fasta.no5merge.collapsed.gff	exon	108111183	108111420	.	-	.	gene_id "RI:1:108111039:108111105-108111183:108111420:-"; transcript_id "RI:1:108111039:108111105-108111183:108111420:-:alternative2";
1	hq_isoforms.fasta.no5merge.collapsed.gff	exon	108111039	108111420	.	-	.	gene_id "RI:1:108111039:108111105-108111183:108111420:-"; transcript_id "RI:1:108111039:108111105-108111183:108111420:-:alternative1";
1	hq_isoforms.fasta.no5merge.collapsed.gff	exon	108111039	108111105	.	-	.	gene_id "RI:1:108111039:108111105-108111183:108111410:-"; transcript_id "RI:1:108111039:108111105-108111183:108111410:-:alternative2";
1	hq_isoforms.fasta.no5merge.collapsed.gff	exon	108111183	108111410	.	-	.	gene_id "RI:1:108111039:108111105-108111183:108111410:-"; transcript_id "RI:1:108111039:108111105-108111183:108111410:-:alternative2";
1	hq_isoforms.fasta.no5merge.collapsed.gff	exon	108111039	108111410	.	-	.	gene_id "RI:1:108111039:108111105-108111183:108111410:-"; transcript_id "RI:1:108111039:108111105-108111183:108111410:-:alternative1";
1	hq_isoforms.fasta.no5merge.collapsed.gff	exon	108144832	108144895	.	-	.	gene_id "RI:1:108144832:108144895-108144984:108145094:-"; transcript_id "RI:1:108144832:108144895-108144984:108145094:-:alternative2";
1	hq_isoforms.fasta.no5merge.collapsed.gff	exon	108144984	108145094	.	-	.	gene_id "RI:1:108144832:108144895-108144984:108145094:-"; transcript_id "RI:1:108144832:108144895-108144984:108145094:-:alternative2";
1	hq_isoforms.fasta.no5merge.collapsed.gff	exon	108144832	108145094	.	-	.	gene_id "RI:1:108144832:108144895-108144984:108145094:-"; transcript_id "RI:1:108144832:108144895-108144984:108145094:-:alternative1";
1	hq_isoforms.fasta.no5merge.collapsed.gff	exon	108167840	108167970	.	-	.	gene_id "RI:1:108167840:108167970-108169036:108169161:-"; transcript_id "RI:1:108167840:108167970-108169036:108169161:-:alternative2";
1	hq_isoforms.fasta.no5merge.collapsed.gff	exon	108169036	108169161	.	-	.	gene_id "RI:1:108167840:108167970-108169036:108169161:-"; transcript_id "RI:1:108167840:108167970-108169036:108169161:-:alternative2";
1	hq_isoforms.fasta.no5merge.collapsed.gff	exon	108167840	108169161	.	-	.	gene_id "RI:1:108167840:108167970-108169036:108169161:-"; transcript_id "RI:1:108167840:108167970-108169036:108169161:-:alternative1";
1	hq_isoforms.fasta.no5merge.collapsed.gff	exon	108175340	108175387	.	-	.	gene_id "RI:1:108175340:108175387-108175464:108175490:-"; transcript_id "RI:1:108175340:108175387-108175464:108175490:-:alternative2";
1	hq_isoforms.fasta.no5merge.collapsed.gff	exon	108175464	108175490	.	-	.	gene_id "RI:1:108175340:108175387-108175464:108175490:-"; transcript_id "RI:1:108175340:108175387-108175464:108175490:-:alternative2";
1	hq_isoforms.fasta.no5merge.collapsed.gff	exon	108175340	108175490	.	-	.	gene_id "RI:1:108175340:108175387-108175464:108175490:-"; transcript_id "RI:1:108175340:108175387-108175464:108175490:-:alternative1";
1	hq_isoforms.fasta.no5merge.collapsed.gff	exon	108169508	108169593	.	-	.	gene_id "RI:1:108169508:108169593-108170982:108171078:-"; transcript_id "RI:1:108169508:108169593-108170982:108171078:-:alternative2";
1	hq_isoforms.fasta.no5merge.collapsed.gff	exon	108170982	108171078	.	-	.	gene_id "RI:1:108169508:108169593-108170982:108171078:-"; transcript_id "RI:1:108169508:108169593-108170982:108171078:-:alternative2";
1	hq_isoforms.fasta.no5merge.collapsed.gff	exon	108169508	108171078	.	-	.	gene_id "RI:1:108169508:108169593-108170982:108171078:-"; transcript_id "RI:1:108169508:108169593-108170982:108171078:-:alternative1";
1	hq_isoforms.fasta.no5merge.collapsed.gff	exon	108169508	108171078	.	-	.	gene_id "RI:1:108169508:108171078-108171808:108171940:-"; transcript_id "RI:1:108169508:108171078-108171808:108171940:-:alternative2";
1	hq_isoforms.fasta.no5merge.collapsed.gff	exon	108171808	108171940	.	-	.	gene_id "RI:1:108169508:108171078-108171808:108171940:-"; transcript_id "RI:1:108169508:108171078-108171808:108171940:-:alternative2";
1	hq_isoforms.fasta.no5merge.collapsed.gff	exon	108169508	108171940	.	-	.	gene_id "RI:1:108169508:108171078-108171808:108171940:-"; transcript_id "RI:1:108169508:108171078-108171808:108171940:-:alternative1";
1	hq_isoforms.fasta.no5merge.collapsed.gff	exon	108245849	108245919	.	-	.	gene_id "RI:1:108245849:108245919-108247670:108247717:-"; transcript_id "RI:1:108245849:108245919-108247670:108247717:-:alternative2";
1	hq_isoforms.fasta.no5merge.collapsed.gff	exon	108247670	108247717	.	-	.	gene_id "RI:1:108245849:108245919-108247670:108247717:-"; transcript_id "RI:1:108245849:108245919-108247670:108247717:-:alternative2";
1	hq_isoforms.fasta.no5merge.collapsed.gff	exon	108245849	108247717	.	-	.	gene_id "RI:1:108245849:108245919-108247670:108247717:-"; transcript_id "RI:1:108245849:108245919-108247670:108247717:-:alternative1";
1	hq_isoforms.fasta.no5merge.collapsed.gff	exon	108285360	108285585	.	-	.	gene_id "RI:1:108285360:108285585-108287822:108288089:-"; transcript_id "RI:1:108285360:108285585-108287822:108288089:-:alternative2";
1	hq_isoforms.fasta.no5merge.collapsed.gff	exon	108287822	108288089	.	-	.	gene_id "RI:1:108285360:108285585-108287822:108288089:-"; transcript_id "RI:1:108285360:108285585-108287822:108288089:-:alternative2";
1	hq_isoforms.fasta.no5merge.collapsed.gff	exon	108285360	108288089	.	-	.	gene_id "RI:1:108285360:108285585-108287822:108288089:-"; transcript_id "RI:1:108285360:108285585-108287822:108288089:-:alternative1";
1	hq_isoforms.fasta.no5merge.collapsed.gff	exon	108332892	108333081	.	-	.	gene_id "RI:1:108332892:108333081-108334047:108334267:-"; transcript_id "RI:1:108332892:108333081-108334047:108334267:-:alternative2";
1	hq_isoforms.fasta.no5merge.collapsed.gff	exon	108334047	108334267	.	-	.	gene_id "RI:1:108332892:108333081-108334047:108334267:-"; transcript_id "RI:1:108332892:108333081-108334047:108334267:-:alternative2";
1	hq_isoforms.fasta.no5merge.collapsed.gff	exon	108332892	108334267	.	-	.	gene_id "RI:1:108332892:108333081-108334047:108334267:-"; transcript_id "RI:1:108332892:108333081-108334047:108334267:-:alternative1";
1	hq_isoforms.fasta.no5merge.collapsed.gff	exon	108321080	108321224	.	-	.	gene_id "RI:1:108321080:108321224-108323247:108323446:-"; transcript_id "RI:1:108321080:108321224-108323247:108323446:-:alternative2";
1	hq_isoforms.fasta.no5merge.collapsed.gff	exon	108323247	108323446	.	-	.	gene_id "RI:1:108321080:108321224-108323247:108323446:-"; transcript_id "RI:1:108321080:108321224-108323247:108323446:-:alternative2";
1	hq_isoforms.fasta.no5merge.collapsed.gff	exon	108321080	108323446	.	-	.	gene_id "RI:1:108321080:108321224-108323247:108323446:-"; transcript_id "RI:1:108321080:108321224-108323247:108323446:-:alternative1";
1	hq_isoforms.fasta.no5merge.collapsed.gff	exon	108321080	108321197	.	-	.	gene_id "RI:1:108321080:108321197-108323272:108323446:-"; transcript_id "RI:1:108321080:108321197-108323272:108323446:-:alternative2";
1	hq_isoforms.fasta.no5merge.collapsed.gff	exon	108323272	108323446	.	-	.	gene_id "RI:1:108321080:108321197-108323272:108323446:-"; transcript_id "RI:1:108321080:108321197-108323272:108323446:-:alternative2";
1	hq_isoforms.fasta.no5merge.collapsed.gff	exon	108321080	108323446	.	-	.	gene_id "RI:1:108321080:108321197-108323272:108323446:-"; transcript_id "RI:1:108321080:108321197-108323272:108323446:-:alternative1";
1	hq_isoforms.fasta.no5merge.collapsed.gff	exon	108319618	108320900	.	-	.	gene_id "RI:1:108319618:108320900-108321080:108321224:-"; transcript_id "RI:1:108319618:108320900-108321080:108321224:-:alternative2";
1	hq_isoforms.fasta.no5merge.collapsed.gff	exon	108321080	108321224	.	-	.	gene_id "RI:1:108319618:108320900-108321080:108321224:-"; transcript_id "RI:1:108319618:108320900-108321080:108321224:-:alternative2";
1	hq_isoforms.fasta.no5merge.collapsed.gff	exon	108319618	108321224	.	-	.	gene_id "RI:1:108319618:108320900-108321080:108321224:-"; transcript_id "RI:1:108319618:108320900-108321080:108321224:-:alternative1";
1	hq_isoforms.fasta.no5merge.collapsed.gff	exon	108653645	108653732	.	-	.	gene_id "RI:1:108653645:108653732-108654665:108654790:-"; transcript_id "RI:1:108653645:108653732-108654665:108654790:-:alternative2";
1	hq_isoforms.fasta.no5merge.collapsed.gff	exon	108654665	108654790	.	-	.	gene_id "RI:1:108653645:108653732-108654665:108654790:-"; transcript_id "RI:1:108653645:108653732-108654665:108654790:-:alternative2";
1	hq_isoforms.fasta.no5merge.collapsed.gff	exon	108653645	108654790	.	-	.	gene_id "RI:1:108653645:108653732-108654665:108654790:-"; transcript_id "RI:1:108653645:108653732-108654665:108654790:-:alternative1";
1	hq_isoforms.fasta.no5merge.collapsed.gff	exon	108659910	108660005	.	-	.	gene_id "RI:1:108659910:108660005-108664168:108664316:-"; transcript_id "RI:1:108659910:108660005-108664168:108664316:-:alternative2";
1	hq_isoforms.fasta.no5merge.collapsed.gff	exon	108664168	108664316	.	-	.	gene_id "RI:1:108659910:108660005-108664168:108664316:-"; transcript_id "RI:1:108659910:108660005-108664168:108664316:-:alternative2";
1	hq_isoforms.fasta.no5merge.collapsed.gff	exon	108659910	108664316	.	-	.	gene_id "RI:1:108659910:108660005-108664168:108664316:-"; transcript_id "RI:1:108659910:108660005-108664168:108664316:-:alternative1";
1	hq_isoforms.fasta.no5merge.collapsed.gff	exon	108659910	108660005	.	-	.	gene_id "RI:1:108659910:108660005-108661205:108664316:-"; transcript_id "RI:1:108659910:108660005-108661205:108664316:-:alternative2";
1	hq_isoforms.fasta.no5merge.collapsed.gff	exon	108661205	108664316	.	-	.	gene_id "RI:1:108659910:108660005-108661205:108664316:-"; transcript_id "RI:1:108659910:108660005-108661205:108664316:-:alternative2";
1	hq_isoforms.fasta.no5merge.collapsed.gff	exon	108659910	108664316	.	-	.	gene_id "RI:1:108659910:108660005-108661205:108664316:-"; transcript_id "RI:1:108659910:108660005-108661205:108664316:-:alternative1";
1	hq_isoforms.fasta.no5merge.collapsed.gff	exon	108650793	108651820	.	-	.	gene_id "RI:1:108650793:108651820-108652446:108652614:-"; transcript_id "RI:1:108650793:108651820-108652446:108652614:-:alternative2";
1	hq_isoforms.fasta.no5merge.collapsed.gff	exon	108652446	108652614	.	-	.	gene_id "RI:1:108650793:108651820-108652446:108652614:-"; transcript_id "RI:1:108650793:108651820-108652446:108652614:-:alternative2";
1	hq_isoforms.fasta.no5merge.collapsed.gff	exon	108650793	108652614	.	-	.	gene_id "RI:1:108650793:108651820-108652446:108652614:-"; transcript_id "RI:1:108650793:108651820-108652446:108652614:-:alternative1";
1	hq_isoforms.fasta.no5merge.collapsed.gff	exon	108666844	108667017	.	-	.	gene_id "RI:1:108666844:108667017-108668051:108668276:-"; transcript_id "RI:1:108666844:108667017-108668051:108668276:-:alternative2";
1	hq_isoforms.fasta.no5merge.collapsed.gff	exon	108668051	108668276	.	-	.	gene_id "RI:1:108666844:108667017-108668051:108668276:-"; transcript_id "RI:1:108666844:108667017-108668051:108668276:-:alternative2";
1	hq_isoforms.fasta.no5merge.collapsed.gff	exon	108666844	108668276	.	-	.	gene_id "RI:1:108666844:108667017-108668051:108668276:-"; transcript_id "RI:1:108666844:108667017-108668051:108668276:-:alternative1";
1	hq_isoforms.fasta.no5merge.collapsed.gff	exon	108732640	108732773	.	-	.	gene_id "RI:1:108732640:108732773-108734739:108734807:-"; transcript_id "RI:1:108732640:108732773-108734739:108734807:-:alternative2";
1	hq_isoforms.fasta.no5merge.collapsed.gff	exon	108734739	108734807	.	-	.	gene_id "RI:1:108732640:108732773-108734739:108734807:-"; transcript_id "RI:1:108732640:108732773-108734739:108734807:-:alternative2";
1	hq_isoforms.fasta.no5merge.collapsed.gff	exon	108732640	108734807	.	-	.	gene_id "RI:1:108732640:108732773-108734739:108734807:-"; transcript_id "RI:1:108732640:108732773-108734739:108734807:-:alternative1";
1	hq_isoforms.fasta.no5merge.collapsed.gff	exon	108718545	108718668	.	-	.	gene_id "RI:1:108718545:108718668-108718755:108718933:-"; transcript_id "RI:1:108718545:108718668-108718755:108718933:-:alternative2";
1	hq_isoforms.fasta.no5merge.collapsed.gff	exon	108718755	108718933	.	-	.	gene_id "RI:1:108718545:108718668-108718755:108718933:-"; transcript_id "RI:1:108718545:108718668-108718755:108718933:-:alternative2";
1	hq_isoforms.fasta.no5merge.collapsed.gff	exon	108718545	108718933	.	-	.	gene_id "RI:1:108718545:108718668-108718755:108718933:-"; transcript_id "RI:1:108718545:108718668-108718755:108718933:-:alternative1";
1	hq_isoforms.fasta.no5merge.collapsed.gff	exon	108731722	108731833	.	-	.	gene_id "RI:1:108731722:108731833-108732640:108734807:-"; transcript_id "RI:1:108731722:108731833-108732640:108734807:-:alternative2";
1	hq_isoforms.fasta.no5merge.collapsed.gff	exon	108732640	108734807	.	-	.	gene_id "RI:1:108731722:108731833-108732640:108734807:-"; transcript_id "RI:1:108731722:108731833-108732640:108734807:-:alternative2";
1	hq_isoforms.fasta.no5merge.collapsed.gff	exon	108731722	108734807	.	-	.	gene_id "RI:1:108731722:108731833-108732640:108734807:-"; transcript_id "RI:1:108731722:108731833-108732640:108734807:-:alternative1";
1	hq_isoforms.fasta.no5merge.collapsed.gff	exon	108795519	108797098	.	-	.	gene_id "RI:1:108795519:108797098-108797665:108797814:-"; transcript_id "RI:1:108795519:108797098-108797665:108797814:-:alternative2";
1	hq_isoforms.fasta.no5merge.collapsed.gff	exon	108797665	108797814	.	-	.	gene_id "RI:1:108795519:108797098-108797665:108797814:-"; transcript_id "RI:1:108795519:108797098-108797665:108797814:-:alternative2";
1	hq_isoforms.fasta.no5merge.collapsed.gff	exon	108795519	108797814	.	-	.	gene_id "RI:1:108795519:108797098-108797665:108797814:-"; transcript_id "RI:1:108795519:108797098-108797665:108797814:-:alternative1";
1	hq_isoforms.fasta.no5merge.collapsed.gff	exon	109943072	109943203	.	-	.	gene_id "RI:1:109943072:109943203-109944244:109944361:-"; transcript_id "RI:1:109943072:109943203-109944244:109944361:-:alternative2";
1	hq_isoforms.fasta.no5merge.collapsed.gff	exon	109944244	109944361	.	-	.	gene_id "RI:1:109943072:109943203-109944244:109944361:-"; transcript_id "RI:1:109943072:109943203-109944244:109944361:-:alternative2";
1	hq_isoforms.fasta.no5merge.collapsed.gff	exon	109943072	109944361	.	-	.	gene_id "RI:1:109943072:109943203-109944244:109944361:-"; transcript_id "RI:1:109943072:109943203-109944244:109944361:-:alternative1";
1	hq_isoforms.fasta.no5merge.collapsed.gff	exon	110351916	110352015	.	-	.	gene_id "RI:1:110351916:110352015-110352944:110353044:-"; transcript_id "RI:1:110351916:110352015-110352944:110353044:-:alternative2";
1	hq_isoforms.fasta.no5merge.collapsed.gff	exon	110352944	110353044	.	-	.	gene_id "RI:1:110351916:110352015-110352944:110353044:-"; transcript_id "RI:1:110351916:110352015-110352944:110353044:-:alternative2";
1	hq_isoforms.fasta.no5merge.collapsed.gff	exon	110351916	110353044	.	-	.	gene_id "RI:1:110351916:110352015-110352944:110353044:-"; transcript_id "RI:1:110351916:110352015-110352944:110353044:-:alternative1";
1	hq_isoforms.fasta.no5merge.collapsed.gff	exon	110486807	110487521	.	-	.	gene_id "RI:1:110486807:110487521-110487915:110488057:-"; transcript_id "RI:1:110486807:110487521-110487915:110488057:-:alternative2";
1	hq_isoforms.fasta.no5merge.collapsed.gff	exon	110487915	110488057	.	-	.	gene_id "RI:1:110486807:110487521-110487915:110488057:-"; transcript_id "RI:1:110486807:110487521-110487915:110488057:-:alternative2";
1	hq_isoforms.fasta.no5merge.collapsed.gff	exon	110486807	110488057	.	-	.	gene_id "RI:1:110486807:110487521-110487915:110488057:-"; transcript_id "RI:1:110486807:110487521-110487915:110488057:-:alternative1";
1	hq_isoforms.fasta.no5merge.collapsed.gff	exon	111296626	111296730	.	-	.	gene_id "RI:1:111296626:111296730-111297654:111297828:-"; transcript_id "RI:1:111296626:111296730-111297654:111297828:-:alternative2";
1	hq_isoforms.fasta.no5merge.collapsed.gff	exon	111297654	111297828	.	-	.	gene_id "RI:1:111296626:111296730-111297654:111297828:-"; transcript_id "RI:1:111296626:111296730-111297654:111297828:-:alternative2";
1	hq_isoforms.fasta.no5merge.collapsed.gff	exon	111296626	111297828	.	-	.	gene_id "RI:1:111296626:111296730-111297654:111297828:-"; transcript_id "RI:1:111296626:111296730-111297654:111297828:-:alternative1";
1	hq_isoforms.fasta.no5merge.collapsed.gff	exon	111296626	111296742	.	-	.	gene_id "RI:1:111296626:111296742-111297633:111297828:-"; transcript_id "RI:1:111296626:111296742-111297633:111297828:-:alternative2";
1	hq_isoforms.fasta.no5merge.collapsed.gff	exon	111297633	111297828	.	-	.	gene_id "RI:1:111296626:111296742-111297633:111297828:-"; transcript_id "RI:1:111296626:111296742-111297633:111297828:-:alternative2";
1	hq_isoforms.fasta.no5merge.collapsed.gff	exon	111296626	111297828	.	-	.	gene_id "RI:1:111296626:111296742-111297633:111297828:-"; transcript_id "RI:1:111296626:111296742-111297633:111297828:-:alternative1";
1	hq_isoforms.fasta.no5merge.collapsed.gff	exon	111311600	111311640	.	-	.	gene_id "RI:1:111311600:111311640-111313185:111313285:-"; transcript_id "RI:1:111311600:111311640-111313185:111313285:-:alternative2";
1	hq_isoforms.fasta.no5merge.collapsed.gff	exon	111313185	111313285	.	-	.	gene_id "RI:1:111311600:111311640-111313185:111313285:-"; transcript_id "RI:1:111311600:111311640-111313185:111313285:-:alternative2";
1	hq_isoforms.fasta.no5merge.collapsed.gff	exon	111311600	111313285	.	-	.	gene_id "RI:1:111311600:111311640-111313185:111313285:-"; transcript_id "RI:1:111311600:111311640-111313185:111313285:-:alternative1";
1	hq_isoforms.fasta.no5merge.collapsed.gff	exon	114366725	114366821	.	-	.	gene_id "RI:1:114366725:114366821-114368601:114368679:-"; transcript_id "RI:1:114366725:114366821-114368601:114368679:-:alternative2";
1	hq_isoforms.fasta.no5merge.collapsed.gff	exon	114368601	114368679	.	-	.	gene_id "RI:1:114366725:114366821-114368601:114368679:-"; transcript_id "RI:1:114366725:114366821-114368601:114368679:-:alternative2";
1	hq_isoforms.fasta.no5merge.collapsed.gff	exon	114366725	114368679	.	-	.	gene_id "RI:1:114366725:114366821-114368601:114368679:-"; transcript_id "RI:1:114366725:114366821-114368601:114368679:-:alternative1";
1	hq_isoforms.fasta.no5merge.collapsed.gff	exon	114379929	114380870	.	-	.	gene_id "RI:1:114379929:114380870-114381439:114381545:-"; transcript_id "RI:1:114379929:114380870-114381439:114381545:-:alternative2";
1	hq_isoforms.fasta.no5merge.collapsed.gff	exon	114381439	114381545	.	-	.	gene_id "RI:1:114379929:114380870-114381439:114381545:-"; transcript_id "RI:1:114379929:114380870-114381439:114381545:-:alternative2";
1	hq_isoforms.fasta.no5merge.collapsed.gff	exon	114379929	114381545	.	-	.	gene_id "RI:1:114379929:114380870-114381439:114381545:-"; transcript_id "RI:1:114379929:114380870-114381439:114381545:-:alternative1";
1	hq_isoforms.fasta.no5merge.collapsed.gff	exon	114381439	114381545	.	-	.	gene_id "RI:1:114381439:114381545-114382163:114382236:-"; transcript_id "RI:1:114381439:114381545-114382163:114382236:-:alternative2";
1	hq_isoforms.fasta.no5merge.collapsed.gff	exon	114382163	114382236	.	-	.	gene_id "RI:1:114381439:114381545-114382163:114382236:-"; transcript_id "RI:1:114381439:114381545-114382163:114382236:-:alternative2";
1	hq_isoforms.fasta.no5merge.collapsed.gff	exon	114381439	114382236	.	-	.	gene_id "RI:1:114381439:114381545-114382163:114382236:-"; transcript_id "RI:1:114381439:114381545-114382163:114382236:-:alternative1";
1	hq_isoforms.fasta.no5merge.collapsed.gff	exon	117079645	117079674	.	-	.	gene_id "RI:1:117079645:117079674-117079739:117079918:-"; transcript_id "RI:1:117079645:117079674-117079739:117079918:-:alternative2";
1	hq_isoforms.fasta.no5merge.collapsed.gff	exon	117079739	117079918	.	-	.	gene_id "RI:1:117079645:117079674-117079739:117079918:-"; transcript_id "RI:1:117079645:117079674-117079739:117079918:-:alternative2";
1	hq_isoforms.fasta.no5merge.collapsed.gff	exon	117079645	117079918	.	-	.	gene_id "RI:1:117079645:117079674-117079739:117079918:-"; transcript_id "RI:1:117079645:117079674-117079739:117079918:-:alternative1";
1	hq_isoforms.fasta.no5merge.collapsed.gff	exon	116942255	116942395	.	-	.	gene_id "RI:1:116942255:116942395-116944950:116945084:-"; transcript_id "RI:1:116942255:116942395-116944950:116945084:-:alternative2";
1	hq_isoforms.fasta.no5merge.collapsed.gff	exon	116944950	116945084	.	-	.	gene_id "RI:1:116942255:116942395-116944950:116945084:-"; transcript_id "RI:1:116942255:116942395-116944950:116945084:-:alternative2";
1	hq_isoforms.fasta.no5merge.collapsed.gff	exon	116942255	116945084	.	-	.	gene_id "RI:1:116942255:116942395-116944950:116945084:-"; transcript_id "RI:1:116942255:116942395-116944950:116945084:-:alternative1";
1	hq_isoforms.fasta.no5merge.collapsed.gff	exon	116992478	116992572	.	-	.	gene_id "RI:1:116992478:116992572-116993417:116993551:-"; transcript_id "RI:1:116992478:116992572-116993417:116993551:-:alternative2";
1	hq_isoforms.fasta.no5merge.collapsed.gff	exon	116993417	116993551	.	-	.	gene_id "RI:1:116992478:116992572-116993417:116993551:-"; transcript_id "RI:1:116992478:116992572-116993417:116993551:-:alternative2";
1	hq_isoforms.fasta.no5merge.collapsed.gff	exon	116992478	116993551	.	-	.	gene_id "RI:1:116992478:116992572-116993417:116993551:-"; transcript_id "RI:1:116992478:116992572-116993417:116993551:-:alternative1";
1	hq_isoforms.fasta.no5merge.collapsed.gff	exon	117078023	117078971	.	-	.	gene_id "RI:1:117078023:117078971-117079278:117079361:-"; transcript_id "RI:1:117078023:117078971-117079278:117079361:-:alternative2";
1	hq_isoforms.fasta.no5merge.collapsed.gff	exon	117079278	117079361	.	-	.	gene_id "RI:1:117078023:117078971-117079278:117079361:-"; transcript_id "RI:1:117078023:117078971-117079278:117079361:-:alternative2";
1	hq_isoforms.fasta.no5merge.collapsed.gff	exon	117078023	117079361	.	-	.	gene_id "RI:1:117078023:117078971-117079278:117079361:-"; transcript_id "RI:1:117078023:117078971-117079278:117079361:-:alternative1";
1	hq_isoforms.fasta.no5merge.collapsed.gff	exon	117078023	117078124	.	-	.	gene_id "RI:1:117078023:117078124-117079278:117079361:-"; transcript_id "RI:1:117078023:117078124-117079278:117079361:-:alternative2";
1	hq_isoforms.fasta.no5merge.collapsed.gff	exon	117079278	117079361	.	-	.	gene_id "RI:1:117078023:117078124-117079278:117079361:-"; transcript_id "RI:1:117078023:117078124-117079278:117079361:-:alternative2";
1	hq_isoforms.fasta.no5merge.collapsed.gff	exon	117078023	117079361	.	-	.	gene_id "RI:1:117078023:117078124-117079278:117079361:-"; transcript_id "RI:1:117078023:117078124-117079278:117079361:-:alternative1";
1	hq_isoforms.fasta.no5merge.collapsed.gff	exon	117078023	117078124	.	-	.	gene_id "RI:1:117078023:117078124-117078864:117078971:-"; transcript_id "RI:1:117078023:117078124-117078864:117078971:-:alternative2";
1	hq_isoforms.fasta.no5merge.collapsed.gff	exon	117078864	117078971	.	-	.	gene_id "RI:1:117078023:117078124-117078864:117078971:-"; transcript_id "RI:1:117078023:117078124-117078864:117078971:-:alternative2";
1	hq_isoforms.fasta.no5merge.collapsed.gff	exon	117078023	117078971	.	-	.	gene_id "RI:1:117078023:117078124-117078864:117078971:-"; transcript_id "RI:1:117078023:117078124-117078864:117078971:-:alternative1";
1	hq_isoforms.fasta.no5merge.collapsed.gff	exon	117077900	117077940	.	-	.	gene_id "RI:1:117077900:117077940-117078023:117079499:-"; transcript_id "RI:1:117077900:117077940-117078023:117079499:-:alternative2";
1	hq_isoforms.fasta.no5merge.collapsed.gff	exon	117078023	117079499	.	-	.	gene_id "RI:1:117077900:117077940-117078023:117079499:-"; transcript_id "RI:1:117077900:117077940-117078023:117079499:-:alternative2";
1	hq_isoforms.fasta.no5merge.collapsed.gff	exon	117077900	117079499	.	-	.	gene_id "RI:1:117077900:117077940-117078023:117079499:-"; transcript_id "RI:1:117077900:117077940-117078023:117079499:-:alternative1";
1	hq_isoforms.fasta.no5merge.collapsed.gff	exon	117077900	117079361	.	-	.	gene_id "RI:1:117077900:117079361-117079448:117079499:-"; transcript_id "RI:1:117077900:117079361-117079448:117079499:-:alternative2";
1	hq_isoforms.fasta.no5merge.collapsed.gff	exon	117079448	117079499	.	-	.	gene_id "RI:1:117077900:117079361-117079448:117079499:-"; transcript_id "RI:1:117077900:117079361-117079448:117079499:-:alternative2";
1	hq_isoforms.fasta.no5merge.collapsed.gff	exon	117077900	117079499	.	-	.	gene_id "RI:1:117077900:117079361-117079448:117079499:-"; transcript_id "RI:1:117077900:117079361-117079448:117079499:-:alternative1";
1	hq_isoforms.fasta.no5merge.collapsed.gff	exon	117079278	117079361	.	-	.	gene_id "RI:1:117079278:117079361-117079448:117079499:-"; transcript_id "RI:1:117079278:117079361-117079448:117079499:-:alternative2";
1	hq_isoforms.fasta.no5merge.collapsed.gff	exon	117079448	117079499	.	-	.	gene_id "RI:1:117079278:117079361-117079448:117079499:-"; transcript_id "RI:1:117079278:117079361-117079448:117079499:-:alternative2";
1	hq_isoforms.fasta.no5merge.collapsed.gff	exon	117079278	117079499	.	-	.	gene_id "RI:1:117079278:117079361-117079448:117079499:-"; transcript_id "RI:1:117079278:117079361-117079448:117079499:-:alternative1";
1	hq_isoforms.fasta.no5merge.collapsed.gff	exon	117077120	117079361	.	-	.	gene_id "RI:1:117077120:117079361-117079448:117079499:-"; transcript_id "RI:1:117077120:117079361-117079448:117079499:-:alternative2";
1	hq_isoforms.fasta.no5merge.collapsed.gff	exon	117079448	117079499	.	-	.	gene_id "RI:1:117077120:117079361-117079448:117079499:-"; transcript_id "RI:1:117077120:117079361-117079448:117079499:-:alternative2";
1	hq_isoforms.fasta.no5merge.collapsed.gff	exon	117077120	117079499	.	-	.	gene_id "RI:1:117077120:117079361-117079448:117079499:-"; transcript_id "RI:1:117077120:117079361-117079448:117079499:-:alternative1";
1	hq_isoforms.fasta.no5merge.collapsed.gff	exon	117077900	117077940	.	-	.	gene_id "RI:1:117077900:117077940-117078023:117079361:-"; transcript_id "RI:1:117077900:117077940-117078023:117079361:-:alternative2";
1	hq_isoforms.fasta.no5merge.collapsed.gff	exon	117078023	117079361	.	-	.	gene_id "RI:1:117077900:117077940-117078023:117079361:-"; transcript_id "RI:1:117077900:117077940-117078023:117079361:-:alternative2";
1	hq_isoforms.fasta.no5merge.collapsed.gff	exon	117077900	117079361	.	-	.	gene_id "RI:1:117077900:117077940-117078023:117079361:-"; transcript_id "RI:1:117077900:117077940-117078023:117079361:-:alternative1";
1	hq_isoforms.fasta.no5merge.collapsed.gff	exon	117078023	117079361	.	-	.	gene_id "RI:1:117078023:117079361-117079448:117079499:-"; transcript_id "RI:1:117078023:117079361-117079448:117079499:-:alternative2";
1	hq_isoforms.fasta.no5merge.collapsed.gff	exon	117079448	117079499	.	-	.	gene_id "RI:1:117078023:117079361-117079448:117079499:-"; transcript_id "RI:1:117078023:117079361-117079448:117079499:-:alternative2";
1	hq_isoforms.fasta.no5merge.collapsed.gff	exon	117078023	117079499	.	-	.	gene_id "RI:1:117078023:117079361-117079448:117079499:-"; transcript_id "RI:1:117078023:117079361-117079448:117079499:-:alternative1";
1	hq_isoforms.fasta.no5merge.collapsed.gff	exon	117078023	117078124	.	-	.	gene_id "RI:1:117078023:117078124-117079278:117079499:-"; transcript_id "RI:1:117078023:117078124-117079278:117079499:-:alternative2";
1	hq_isoforms.fasta.no5merge.collapsed.gff	exon	117079278	117079499	.	-	.	gene_id "RI:1:117078023:117078124-117079278:117079499:-"; transcript_id "RI:1:117078023:117078124-117079278:117079499:-:alternative2";
1	hq_isoforms.fasta.no5merge.collapsed.gff	exon	117078023	117079499	.	-	.	gene_id "RI:1:117078023:117078124-117079278:117079499:-"; transcript_id "RI:1:117078023:117078124-117079278:117079499:-:alternative1";
1	hq_isoforms.fasta.no5merge.collapsed.gff	exon	117795655	117795744	.	-	.	gene_id "RI:1:117795655:117795744-117796672:117796826:-"; transcript_id "RI:1:117795655:117795744-117796672:117796826:-:alternative2";
1	hq_isoforms.fasta.no5merge.collapsed.gff	exon	117796672	117796826	.	-	.	gene_id "RI:1:117795655:117795744-117796672:117796826:-"; transcript_id "RI:1:117795655:117795744-117796672:117796826:-:alternative2";
1	hq_isoforms.fasta.no5merge.collapsed.gff	exon	117795655	117796826	.	-	.	gene_id "RI:1:117795655:117795744-117796672:117796826:-"; transcript_id "RI:1:117795655:117795744-117796672:117796826:-:alternative1";
1	hq_isoforms.fasta.no5merge.collapsed.gff	exon	118573024	118575857	.	-	.	gene_id "RI:1:118573024:118575857-118575902:118579203:-"; transcript_id "RI:1:118573024:118575857-118575902:118579203:-:alternative2";
1	hq_isoforms.fasta.no5merge.collapsed.gff	exon	118575902	118579203	.	-	.	gene_id "RI:1:118573024:118575857-118575902:118579203:-"; transcript_id "RI:1:118573024:118575857-118575902:118579203:-:alternative2";
1	hq_isoforms.fasta.no5merge.collapsed.gff	exon	118573024	118579203	.	-	.	gene_id "RI:1:118573024:118575857-118575902:118579203:-"; transcript_id "RI:1:118573024:118575857-118575902:118579203:-:alternative1";
1	hq_isoforms.fasta.no5merge.collapsed.gff	exon	118612822	118613825	.	-	.	gene_id "RI:1:118612822:118613825-118616002:118616093:-"; transcript_id "RI:1:118612822:118613825-118616002:118616093:-:alternative2";
1	hq_isoforms.fasta.no5merge.collapsed.gff	exon	118616002	118616093	.	-	.	gene_id "RI:1:118612822:118613825-118616002:118616093:-"; transcript_id "RI:1:118612822:118613825-118616002:118616093:-:alternative2";
1	hq_isoforms.fasta.no5merge.collapsed.gff	exon	118612822	118616093	.	-	.	gene_id "RI:1:118612822:118613825-118616002:118616093:-"; transcript_id "RI:1:118612822:118613825-118616002:118616093:-:alternative1";
1	hq_isoforms.fasta.no5merge.collapsed.gff	exon	119902144	119902227	.	-	.	gene_id "RI:1:119902144:119902227-119903034:119903234:-"; transcript_id "RI:1:119902144:119902227-119903034:119903234:-:alternative2";
1	hq_isoforms.fasta.no5merge.collapsed.gff	exon	119903034	119903234	.	-	.	gene_id "RI:1:119902144:119902227-119903034:119903234:-"; transcript_id "RI:1:119902144:119902227-119903034:119903234:-:alternative2";
1	hq_isoforms.fasta.no5merge.collapsed.gff	exon	119902144	119903234	.	-	.	gene_id "RI:1:119902144:119902227-119903034:119903234:-"; transcript_id "RI:1:119902144:119902227-119903034:119903234:-:alternative1";
1	hq_isoforms.fasta.no5merge.collapsed.gff	exon	121115976	121116159	.	-	.	gene_id "RI:1:121115976:121116159-121116620:121116673:-"; transcript_id "RI:1:121115976:121116159-121116620:121116673:-:alternative2";
1	hq_isoforms.fasta.no5merge.collapsed.gff	exon	121116620	121116673	.	-	.	gene_id "RI:1:121115976:121116159-121116620:121116673:-"; transcript_id "RI:1:121115976:121116159-121116620:121116673:-:alternative2";
1	hq_isoforms.fasta.no5merge.collapsed.gff	exon	121115976	121116673	.	-	.	gene_id "RI:1:121115976:121116159-121116620:121116673:-"; transcript_id "RI:1:121115976:121116159-121116620:121116673:-:alternative1";
1	hq_isoforms.fasta.no5merge.collapsed.gff	exon	121302374	121302533	.	-	.	gene_id "RI:1:121302374:121302533-121304125:121304203:-"; transcript_id "RI:1:121302374:121302533-121304125:121304203:-:alternative2";
1	hq_isoforms.fasta.no5merge.collapsed.gff	exon	121304125	121304203	.	-	.	gene_id "RI:1:121302374:121302533-121304125:121304203:-"; transcript_id "RI:1:121302374:121302533-121304125:121304203:-:alternative2";
1	hq_isoforms.fasta.no5merge.collapsed.gff	exon	121302374	121304203	.	-	.	gene_id "RI:1:121302374:121302533-121304125:121304203:-"; transcript_id "RI:1:121302374:121302533-121304125:121304203:-:alternative1";
1	hq_isoforms.fasta.no5merge.collapsed.gff	exon	121308908	121309680	.	-	.	gene_id "RI:1:121308908:121309680-121310075:121310203:-"; transcript_id "RI:1:121308908:121309680-121310075:121310203:-:alternative2";
1	hq_isoforms.fasta.no5merge.collapsed.gff	exon	121310075	121310203	.	-	.	gene_id "RI:1:121308908:121309680-121310075:121310203:-"; transcript_id "RI:1:121308908:121309680-121310075:121310203:-:alternative2";
1	hq_isoforms.fasta.no5merge.collapsed.gff	exon	121308908	121310203	.	-	.	gene_id "RI:1:121308908:121309680-121310075:121310203:-"; transcript_id "RI:1:121308908:121309680-121310075:121310203:-:alternative1";
1	hq_isoforms.fasta.no5merge.collapsed.gff	exon	121308908	121309040	.	-	.	gene_id "RI:1:121308908:121309040-121309573:121309680:-"; transcript_id "RI:1:121308908:121309040-121309573:121309680:-:alternative2";
1	hq_isoforms.fasta.no5merge.collapsed.gff	exon	121309573	121309680	.	-	.	gene_id "RI:1:121308908:121309040-121309573:121309680:-"; transcript_id "RI:1:121308908:121309040-121309573:121309680:-:alternative2";
1	hq_isoforms.fasta.no5merge.collapsed.gff	exon	121308908	121309680	.	-	.	gene_id "RI:1:121308908:121309040-121309573:121309680:-"; transcript_id "RI:1:121308908:121309040-121309573:121309680:-:alternative1";
1	hq_isoforms.fasta.no5merge.collapsed.gff	exon	122682229	122683342	.	-	.	gene_id "RI:1:122682229:122683342-122684052:122684260:-"; transcript_id "RI:1:122682229:122683342-122684052:122684260:-:alternative2";
1	hq_isoforms.fasta.no5merge.collapsed.gff	exon	122684052	122684260	.	-	.	gene_id "RI:1:122682229:122683342-122684052:122684260:-"; transcript_id "RI:1:122682229:122683342-122684052:122684260:-:alternative2";
1	hq_isoforms.fasta.no5merge.collapsed.gff	exon	122682229	122684260	.	-	.	gene_id "RI:1:122682229:122683342-122684052:122684260:-"; transcript_id "RI:1:122682229:122683342-122684052:122684260:-:alternative1";
1	hq_isoforms.fasta.no5merge.collapsed.gff	exon	123243911	123243911	.	-	.	gene_id "RI:1:123243911:123243911-123243941:123244016:-"; transcript_id "RI:1:123243911:123243911-123243941:123244016:-:alternative2";
1	hq_isoforms.fasta.no5merge.collapsed.gff	exon	123243941	123244016	.	-	.	gene_id "RI:1:123243911:123243911-123243941:123244016:-"; transcript_id "RI:1:123243911:123243911-123243941:123244016:-:alternative2";
1	hq_isoforms.fasta.no5merge.collapsed.gff	exon	123243911	123244016	.	-	.	gene_id "RI:1:123243911:123243911-123243941:123244016:-"; transcript_id "RI:1:123243911:123243911-123243941:123244016:-:alternative1";
1	hq_isoforms.fasta.no5merge.collapsed.gff	exon	123247308	123247451	.	-	.	gene_id "RI:1:123247308:123247451-123248459:123248558:-"; transcript_id "RI:1:123247308:123247451-123248459:123248558:-:alternative2";
1	hq_isoforms.fasta.no5merge.collapsed.gff	exon	123248459	123248558	.	-	.	gene_id "RI:1:123247308:123247451-123248459:123248558:-"; transcript_id "RI:1:123247308:123247451-123248459:123248558:-:alternative2";
1	hq_isoforms.fasta.no5merge.collapsed.gff	exon	123247308	123248558	.	-	.	gene_id "RI:1:123247308:123247451-123248459:123248558:-"; transcript_id "RI:1:123247308:123247451-123248459:123248558:-:alternative1";
1	hq_isoforms.fasta.no5merge.collapsed.gff	exon	123247308	123247451	.	-	.	gene_id "RI:1:123247308:123247451-123248455:123248558:-"; transcript_id "RI:1:123247308:123247451-123248455:123248558:-:alternative2";
1	hq_isoforms.fasta.no5merge.collapsed.gff	exon	123248455	123248558	.	-	.	gene_id "RI:1:123247308:123247451-123248455:123248558:-"; transcript_id "RI:1:123247308:123247451-123248455:123248558:-:alternative2";
1	hq_isoforms.fasta.no5merge.collapsed.gff	exon	123247308	123248558	.	-	.	gene_id "RI:1:123247308:123247451-123248455:123248558:-"; transcript_id "RI:1:123247308:123247451-123248455:123248558:-:alternative1";
1	hq_isoforms.fasta.no5merge.collapsed.gff	exon	123454396	123454507	.	-	.	gene_id "RI:1:123454396:123454507-123457191:123457236:-"; transcript_id "RI:1:123454396:123454507-123457191:123457236:-:alternative2";
1	hq_isoforms.fasta.no5merge.collapsed.gff	exon	123457191	123457236	.	-	.	gene_id "RI:1:123454396:123454507-123457191:123457236:-"; transcript_id "RI:1:123454396:123454507-123457191:123457236:-:alternative2";
1	hq_isoforms.fasta.no5merge.collapsed.gff	exon	123454396	123457236	.	-	.	gene_id "RI:1:123454396:123454507-123457191:123457236:-"; transcript_id "RI:1:123454396:123454507-123457191:123457236:-:alternative1";
1	hq_isoforms.fasta.no5merge.collapsed.gff	exon	123461685	123461768	.	-	.	gene_id "RI:1:123461685:123461768-123464630:123464734:-"; transcript_id "RI:1:123461685:123461768-123464630:123464734:-:alternative2";
1	hq_isoforms.fasta.no5merge.collapsed.gff	exon	123464630	123464734	.	-	.	gene_id "RI:1:123461685:123461768-123464630:123464734:-"; transcript_id "RI:1:123461685:123461768-123464630:123464734:-:alternative2";
1	hq_isoforms.fasta.no5merge.collapsed.gff	exon	123461685	123464734	.	-	.	gene_id "RI:1:123461685:123461768-123464630:123464734:-"; transcript_id "RI:1:123461685:123461768-123464630:123464734:-:alternative1";
1	hq_isoforms.fasta.no5merge.collapsed.gff	exon	123859250	123859422	.	-	.	gene_id "RI:1:123859250:123859422-123861090:123861166:-"; transcript_id "RI:1:123859250:123859422-123861090:123861166:-:alternative2";
1	hq_isoforms.fasta.no5merge.collapsed.gff	exon	123861090	123861166	.	-	.	gene_id "RI:1:123859250:123859422-123861090:123861166:-"; transcript_id "RI:1:123859250:123859422-123861090:123861166:-:alternative2";
1	hq_isoforms.fasta.no5merge.collapsed.gff	exon	123859250	123861166	.	-	.	gene_id "RI:1:123859250:123859422-123861090:123861166:-"; transcript_id "RI:1:123859250:123859422-123861090:123861166:-:alternative1";
1	hq_isoforms.fasta.no5merge.collapsed.gff	exon	124037979	124038114	.	-	.	gene_id "RI:1:124037979:124038114-124038961:124039039:-"; transcript_id "RI:1:124037979:124038114-124038961:124039039:-:alternative2";
1	hq_isoforms.fasta.no5merge.collapsed.gff	exon	124038961	124039039	.	-	.	gene_id "RI:1:124037979:124038114-124038961:124039039:-"; transcript_id "RI:1:124037979:124038114-124038961:124039039:-:alternative2";
1	hq_isoforms.fasta.no5merge.collapsed.gff	exon	124037979	124039039	.	-	.	gene_id "RI:1:124037979:124038114-124038961:124039039:-"; transcript_id "RI:1:124037979:124038114-124038961:124039039:-:alternative1";
1	hq_isoforms.fasta.no5merge.collapsed.gff	exon	124041981	124042062	.	-	.	gene_id "RI:1:124041981:124042062-124043685:124043944:-"; transcript_id "RI:1:124041981:124042062-124043685:124043944:-:alternative2";
1	hq_isoforms.fasta.no5merge.collapsed.gff	exon	124043685	124043944	.	-	.	gene_id "RI:1:124041981:124042062-124043685:124043944:-"; transcript_id "RI:1:124041981:124042062-124043685:124043944:-:alternative2";
1	hq_isoforms.fasta.no5merge.collapsed.gff	exon	124041981	124043944	.	-	.	gene_id "RI:1:124041981:124042062-124043685:124043944:-"; transcript_id "RI:1:124041981:124042062-124043685:124043944:-:alternative1";
1	hq_isoforms.fasta.no5merge.collapsed.gff	exon	124041981	124042017	.	-	.	gene_id "RI:1:124041981:124042017-124043685:124043944:-"; transcript_id "RI:1:124041981:124042017-124043685:124043944:-:alternative2";
1	hq_isoforms.fasta.no5merge.collapsed.gff	exon	124043685	124043944	.	-	.	gene_id "RI:1:124041981:124042017-124043685:124043944:-"; transcript_id "RI:1:124041981:124042017-124043685:124043944:-:alternative2";
1	hq_isoforms.fasta.no5merge.collapsed.gff	exon	124041981	124043944	.	-	.	gene_id "RI:1:124041981:124042017-124043685:124043944:-"; transcript_id "RI:1:124041981:124042017-124043685:124043944:-:alternative1";
1	hq_isoforms.fasta.no5merge.collapsed.gff	exon	124164549	124164599	.	-	.	gene_id "RI:1:124164549:124164599-124165916:124166048:-"; transcript_id "RI:1:124164549:124164599-124165916:124166048:-:alternative2";
1	hq_isoforms.fasta.no5merge.collapsed.gff	exon	124165916	124166048	.	-	.	gene_id "RI:1:124164549:124164599-124165916:124166048:-"; transcript_id "RI:1:124164549:124164599-124165916:124166048:-:alternative2";
1	hq_isoforms.fasta.no5merge.collapsed.gff	exon	124164549	124166048	.	-	.	gene_id "RI:1:124164549:124164599-124165916:124166048:-"; transcript_id "RI:1:124164549:124164599-124165916:124166048:-:alternative1";
1	hq_isoforms.fasta.no5merge.collapsed.gff	exon	125090833	125090925	.	-	.	gene_id "RI:1:125090833:125090925-125091132:125091223:-"; transcript_id "RI:1:125090833:125090925-125091132:125091223:-:alternative2";
1	hq_isoforms.fasta.no5merge.collapsed.gff	exon	125091132	125091223	.	-	.	gene_id "RI:1:125090833:125090925-125091132:125091223:-"; transcript_id "RI:1:125090833:125090925-125091132:125091223:-:alternative2";
1	hq_isoforms.fasta.no5merge.collapsed.gff	exon	125090833	125091223	.	-	.	gene_id "RI:1:125090833:125090925-125091132:125091223:-"; transcript_id "RI:1:125090833:125090925-125091132:125091223:-:alternative1";
1	hq_isoforms.fasta.no5merge.collapsed.gff	exon	125354145	125354213	.	-	.	gene_id "RI:1:125354145:125354213-125354320:125355171:-"; transcript_id "RI:1:125354145:125354213-125354320:125355171:-:alternative2";
1	hq_isoforms.fasta.no5merge.collapsed.gff	exon	125354320	125355171	.	-	.	gene_id "RI:1:125354145:125354213-125354320:125355171:-"; transcript_id "RI:1:125354145:125354213-125354320:125355171:-:alternative2";
1	hq_isoforms.fasta.no5merge.collapsed.gff	exon	125354145	125355171	.	-	.	gene_id "RI:1:125354145:125354213-125354320:125355171:-"; transcript_id "RI:1:125354145:125354213-125354320:125355171:-:alternative1";
1	hq_isoforms.fasta.no5merge.collapsed.gff	exon	126094674	126094816	.	-	.	gene_id "RI:1:126094674:126094816-126096564:126096627:-"; transcript_id "RI:1:126094674:126094816-126096564:126096627:-:alternative2";
1	hq_isoforms.fasta.no5merge.collapsed.gff	exon	126096564	126096627	.	-	.	gene_id "RI:1:126094674:126094816-126096564:126096627:-"; transcript_id "RI:1:126094674:126094816-126096564:126096627:-:alternative2";
1	hq_isoforms.fasta.no5merge.collapsed.gff	exon	126094674	126096627	.	-	.	gene_id "RI:1:126094674:126094816-126096564:126096627:-"; transcript_id "RI:1:126094674:126094816-126096564:126096627:-:alternative1";
1	hq_isoforms.fasta.no5merge.collapsed.gff	exon	126214987	126215045	.	-	.	gene_id "RI:1:126214987:126215045-126220220:126220369:-"; transcript_id "RI:1:126214987:126215045-126220220:126220369:-:alternative2";
1	hq_isoforms.fasta.no5merge.collapsed.gff	exon	126220220	126220369	.	-	.	gene_id "RI:1:126214987:126215045-126220220:126220369:-"; transcript_id "RI:1:126214987:126215045-126220220:126220369:-:alternative2";
1	hq_isoforms.fasta.no5merge.collapsed.gff	exon	126214987	126220369	.	-	.	gene_id "RI:1:126214987:126215045-126220220:126220369:-"; transcript_id "RI:1:126214987:126215045-126220220:126220369:-:alternative1";
1	hq_isoforms.fasta.no5merge.collapsed.gff	exon	127733539	127733712	.	-	.	gene_id "RI:1:127733539:127733712-127735752:127735888:-"; transcript_id "RI:1:127733539:127733712-127735752:127735888:-:alternative2";
1	hq_isoforms.fasta.no5merge.collapsed.gff	exon	127735752	127735888	.	-	.	gene_id "RI:1:127733539:127733712-127735752:127735888:-"; transcript_id "RI:1:127733539:127733712-127735752:127735888:-:alternative2";
1	hq_isoforms.fasta.no5merge.collapsed.gff	exon	127733539	127735888	.	-	.	gene_id "RI:1:127733539:127733712-127735752:127735888:-"; transcript_id "RI:1:127733539:127733712-127735752:127735888:-:alternative1";
1	hq_isoforms.fasta.no5merge.collapsed.gff	exon	128214913	128214958	.	-	.	gene_id "RI:1:128214913:128214958-128215049:128215079:-"; transcript_id "RI:1:128214913:128214958-128215049:128215079:-:alternative2";
1	hq_isoforms.fasta.no5merge.collapsed.gff	exon	128215049	128215079	.	-	.	gene_id "RI:1:128214913:128214958-128215049:128215079:-"; transcript_id "RI:1:128214913:128214958-128215049:128215079:-:alternative2";
1	hq_isoforms.fasta.no5merge.collapsed.gff	exon	128214913	128215079	.	-	.	gene_id "RI:1:128214913:128214958-128215049:128215079:-"; transcript_id "RI:1:128214913:128214958-128215049:128215079:-:alternative1";
1	hq_isoforms.fasta.no5merge.collapsed.gff	exon	128726515	128726661	.	-	.	gene_id "RI:1:128726515:128726661-128726698:128727419:-"; transcript_id "RI:1:128726515:128726661-128726698:128727419:-:alternative2";
1	hq_isoforms.fasta.no5merge.collapsed.gff	exon	128726698	128727419	.	-	.	gene_id "RI:1:128726515:128726661-128726698:128727419:-"; transcript_id "RI:1:128726515:128726661-128726698:128727419:-:alternative2";
1	hq_isoforms.fasta.no5merge.collapsed.gff	exon	128726515	128727419	.	-	.	gene_id "RI:1:128726515:128726661-128726698:128727419:-"; transcript_id "RI:1:128726515:128726661-128726698:128727419:-:alternative1";
1	hq_isoforms.fasta.no5merge.collapsed.gff	exon	128741821	128741938	.	-	.	gene_id "RI:1:128741821:128741938-128743667:128743764:-"; transcript_id "RI:1:128741821:128741938-128743667:128743764:-:alternative2";
1	hq_isoforms.fasta.no5merge.collapsed.gff	exon	128743667	128743764	.	-	.	gene_id "RI:1:128741821:128741938-128743667:128743764:-"; transcript_id "RI:1:128741821:128741938-128743667:128743764:-:alternative2";
1	hq_isoforms.fasta.no5merge.collapsed.gff	exon	128741821	128743764	.	-	.	gene_id "RI:1:128741821:128741938-128743667:128743764:-"; transcript_id "RI:1:128741821:128741938-128743667:128743764:-:alternative1";
1	hq_isoforms.fasta.no5merge.collapsed.gff	exon	128741821	128741943	.	-	.	gene_id "RI:1:128741821:128741943-128743664:128743764:-"; transcript_id "RI:1:128741821:128741943-128743664:128743764:-:alternative2";
1	hq_isoforms.fasta.no5merge.collapsed.gff	exon	128743664	128743764	.	-	.	gene_id "RI:1:128741821:128741943-128743664:128743764:-"; transcript_id "RI:1:128741821:128741943-128743664:128743764:-:alternative2";
1	hq_isoforms.fasta.no5merge.collapsed.gff	exon	128741821	128743764	.	-	.	gene_id "RI:1:128741821:128741943-128743664:128743764:-"; transcript_id "RI:1:128741821:128741943-128743664:128743764:-:alternative1";
1	hq_isoforms.fasta.no5merge.collapsed.gff	exon	129751486	129753841	.	-	.	gene_id "RI:1:129751486:129753841-129753963:129754318:-"; transcript_id "RI:1:129751486:129753841-129753963:129754318:-:alternative2";
1	hq_isoforms.fasta.no5merge.collapsed.gff	exon	129753963	129754318	.	-	.	gene_id "RI:1:129751486:129753841-129753963:129754318:-"; transcript_id "RI:1:129751486:129753841-129753963:129754318:-:alternative2";
1	hq_isoforms.fasta.no5merge.collapsed.gff	exon	129751486	129754318	.	-	.	gene_id "RI:1:129751486:129753841-129753963:129754318:-"; transcript_id "RI:1:129751486:129753841-129753963:129754318:-:alternative1";
1	hq_isoforms.fasta.no5merge.collapsed.gff	exon	129927097	129927224	.	-	.	gene_id "RI:1:129927097:129927224-129929725:129929799:-"; transcript_id "RI:1:129927097:129927224-129929725:129929799:-:alternative2";
1	hq_isoforms.fasta.no5merge.collapsed.gff	exon	129929725	129929799	.	-	.	gene_id "RI:1:129927097:129927224-129929725:129929799:-"; transcript_id "RI:1:129927097:129927224-129929725:129929799:-:alternative2";
1	hq_isoforms.fasta.no5merge.collapsed.gff	exon	129927097	129929799	.	-	.	gene_id "RI:1:129927097:129927224-129929725:129929799:-"; transcript_id "RI:1:129927097:129927224-129929725:129929799:-:alternative1";
1	hq_isoforms.fasta.no5merge.collapsed.gff	exon	133810727	133811480	.	-	.	gene_id "RI:1:133810727:133811480-133811595:133811759:-"; transcript_id "RI:1:133810727:133811480-133811595:133811759:-:alternative2";
1	hq_isoforms.fasta.no5merge.collapsed.gff	exon	133811595	133811759	.	-	.	gene_id "RI:1:133810727:133811480-133811595:133811759:-"; transcript_id "RI:1:133810727:133811480-133811595:133811759:-:alternative2";
1	hq_isoforms.fasta.no5merge.collapsed.gff	exon	133810727	133811759	.	-	.	gene_id "RI:1:133810727:133811480-133811595:133811759:-"; transcript_id "RI:1:133810727:133811480-133811595:133811759:-:alternative1";
1	hq_isoforms.fasta.no5merge.collapsed.gff	exon	134160475	134161709	.	-	.	gene_id "RI:1:134160475:134161709-134162373:134162553:-"; transcript_id "RI:1:134160475:134161709-134162373:134162553:-:alternative2";
1	hq_isoforms.fasta.no5merge.collapsed.gff	exon	134162373	134162553	.	-	.	gene_id "RI:1:134160475:134161709-134162373:134162553:-"; transcript_id "RI:1:134160475:134161709-134162373:134162553:-:alternative2";
1	hq_isoforms.fasta.no5merge.collapsed.gff	exon	134160475	134162553	.	-	.	gene_id "RI:1:134160475:134161709-134162373:134162553:-"; transcript_id "RI:1:134160475:134161709-134162373:134162553:-:alternative1";
1	hq_isoforms.fasta.no5merge.collapsed.gff	exon	135043612	135046935	.	-	.	gene_id "RI:1:135043612:135046935-135047022:135049115:-"; transcript_id "RI:1:135043612:135046935-135047022:135049115:-:alternative2";
1	hq_isoforms.fasta.no5merge.collapsed.gff	exon	135047022	135049115	.	-	.	gene_id "RI:1:135043612:135046935-135047022:135049115:-"; transcript_id "RI:1:135043612:135046935-135047022:135049115:-:alternative2";
1	hq_isoforms.fasta.no5merge.collapsed.gff	exon	135043612	135049115	.	-	.	gene_id "RI:1:135043612:135046935-135047022:135049115:-"; transcript_id "RI:1:135043612:135046935-135047022:135049115:-:alternative1";
1	hq_isoforms.fasta.no5merge.collapsed.gff	exon	135579899	135579995	.	-	.	gene_id "RI:1:135579899:135579995-135584742:135585439:-"; transcript_id "RI:1:135579899:135579995-135584742:135585439:-:alternative2";
1	hq_isoforms.fasta.no5merge.collapsed.gff	exon	135584742	135585439	.	-	.	gene_id "RI:1:135579899:135579995-135584742:135585439:-"; transcript_id "RI:1:135579899:135579995-135584742:135585439:-:alternative2";
1	hq_isoforms.fasta.no5merge.collapsed.gff	exon	135579899	135585439	.	-	.	gene_id "RI:1:135579899:135579995-135584742:135585439:-"; transcript_id "RI:1:135579899:135579995-135584742:135585439:-:alternative1";
1	hq_isoforms.fasta.no5merge.collapsed.gff	exon	135871533	135872512	.	-	.	gene_id "RI:1:135871533:135872512-135873819:135873940:-"; transcript_id "RI:1:135871533:135872512-135873819:135873940:-:alternative2";
1	hq_isoforms.fasta.no5merge.collapsed.gff	exon	135873819	135873940	.	-	.	gene_id "RI:1:135871533:135872512-135873819:135873940:-"; transcript_id "RI:1:135871533:135872512-135873819:135873940:-:alternative2";
1	hq_isoforms.fasta.no5merge.collapsed.gff	exon	135871533	135873940	.	-	.	gene_id "RI:1:135871533:135872512-135873819:135873940:-"; transcript_id "RI:1:135871533:135872512-135873819:135873940:-:alternative1";
1	hq_isoforms.fasta.no5merge.collapsed.gff	exon	135912057	135912182	.	-	.	gene_id "RI:1:135912057:135912182-135912544:135912640:-"; transcript_id "RI:1:135912057:135912182-135912544:135912640:-:alternative2";
1	hq_isoforms.fasta.no5merge.collapsed.gff	exon	135912544	135912640	.	-	.	gene_id "RI:1:135912057:135912182-135912544:135912640:-"; transcript_id "RI:1:135912057:135912182-135912544:135912640:-:alternative2";
1	hq_isoforms.fasta.no5merge.collapsed.gff	exon	135912057	135912640	.	-	.	gene_id "RI:1:135912057:135912182-135912544:135912640:-"; transcript_id "RI:1:135912057:135912182-135912544:135912640:-:alternative1";
1	hq_isoforms.fasta.no5merge.collapsed.gff	exon	135905818	135905875	.	-	.	gene_id "RI:1:135905818:135905875-135906938:135907046:-"; transcript_id "RI:1:135905818:135905875-135906938:135907046:-:alternative2";
1	hq_isoforms.fasta.no5merge.collapsed.gff	exon	135906938	135907046	.	-	.	gene_id "RI:1:135905818:135905875-135906938:135907046:-"; transcript_id "RI:1:135905818:135905875-135906938:135907046:-:alternative2";
1	hq_isoforms.fasta.no5merge.collapsed.gff	exon	135905818	135907046	.	-	.	gene_id "RI:1:135905818:135905875-135906938:135907046:-"; transcript_id "RI:1:135905818:135905875-135906938:135907046:-:alternative1";
1	hq_isoforms.fasta.no5merge.collapsed.gff	exon	135909643	135911304	.	-	.	gene_id "RI:1:135909643:135911304-135912057:135912182:-"; transcript_id "RI:1:135909643:135911304-135912057:135912182:-:alternative2";
1	hq_isoforms.fasta.no5merge.collapsed.gff	exon	135912057	135912182	.	-	.	gene_id "RI:1:135909643:135911304-135912057:135912182:-"; transcript_id "RI:1:135909643:135911304-135912057:135912182:-:alternative2";
1	hq_isoforms.fasta.no5merge.collapsed.gff	exon	135909643	135912182	.	-	.	gene_id "RI:1:135909643:135911304-135912057:135912182:-"; transcript_id "RI:1:135909643:135911304-135912057:135912182:-:alternative1";
1	hq_isoforms.fasta.no5merge.collapsed.gff	exon	136697177	136698006	.	-	.	gene_id "RI:1:136697177:136698006-136699386:136699572:-"; transcript_id "RI:1:136697177:136698006-136699386:136699572:-:alternative2";
1	hq_isoforms.fasta.no5merge.collapsed.gff	exon	136699386	136699572	.	-	.	gene_id "RI:1:136697177:136698006-136699386:136699572:-"; transcript_id "RI:1:136697177:136698006-136699386:136699572:-:alternative2";
1	hq_isoforms.fasta.no5merge.collapsed.gff	exon	136697177	136699572	.	-	.	gene_id "RI:1:136697177:136698006-136699386:136699572:-"; transcript_id "RI:1:136697177:136698006-136699386:136699572:-:alternative1";
1	hq_isoforms.fasta.no5merge.collapsed.gff	exon	136712279	136712362	.	-	.	gene_id "RI:1:136712279:136712362-136714829:136715103:-"; transcript_id "RI:1:136712279:136712362-136714829:136715103:-:alternative2";
1	hq_isoforms.fasta.no5merge.collapsed.gff	exon	136714829	136715103	.	-	.	gene_id "RI:1:136712279:136712362-136714829:136715103:-"; transcript_id "RI:1:136712279:136712362-136714829:136715103:-:alternative2";
1	hq_isoforms.fasta.no5merge.collapsed.gff	exon	136712279	136715103	.	-	.	gene_id "RI:1:136712279:136712362-136714829:136715103:-"; transcript_id "RI:1:136712279:136712362-136714829:136715103:-:alternative1";
1	hq_isoforms.fasta.no5merge.collapsed.gff	exon	136712279	136712344	.	-	.	gene_id "RI:1:136712279:136712344-136714861:136715103:-"; transcript_id "RI:1:136712279:136712344-136714861:136715103:-:alternative2";
1	hq_isoforms.fasta.no5merge.collapsed.gff	exon	136714861	136715103	.	-	.	gene_id "RI:1:136712279:136712344-136714861:136715103:-"; transcript_id "RI:1:136712279:136712344-136714861:136715103:-:alternative2";
1	hq_isoforms.fasta.no5merge.collapsed.gff	exon	136712279	136715103	.	-	.	gene_id "RI:1:136712279:136712344-136714861:136715103:-"; transcript_id "RI:1:136712279:136712344-136714861:136715103:-:alternative1";
1	hq_isoforms.fasta.no5merge.collapsed.gff	exon	136716756	136716851	.	-	.	gene_id "RI:1:136716756:136716851-136721466:136721549:-"; transcript_id "RI:1:136716756:136716851-136721466:136721549:-:alternative2";
1	hq_isoforms.fasta.no5merge.collapsed.gff	exon	136721466	136721549	.	-	.	gene_id "RI:1:136716756:136716851-136721466:136721549:-"; transcript_id "RI:1:136716756:136716851-136721466:136721549:-:alternative2";
1	hq_isoforms.fasta.no5merge.collapsed.gff	exon	136716756	136721549	.	-	.	gene_id "RI:1:136716756:136716851-136721466:136721549:-"; transcript_id "RI:1:136716756:136716851-136721466:136721549:-:alternative1";
1	hq_isoforms.fasta.no5merge.collapsed.gff	exon	137226848	137227149	.	-	.	gene_id "RI:1:137226848:137227149-137228977:137229453:-"; transcript_id "RI:1:137226848:137227149-137228977:137229453:-:alternative2";
1	hq_isoforms.fasta.no5merge.collapsed.gff	exon	137228977	137229453	.	-	.	gene_id "RI:1:137226848:137227149-137228977:137229453:-"; transcript_id "RI:1:137226848:137227149-137228977:137229453:-:alternative2";
1	hq_isoforms.fasta.no5merge.collapsed.gff	exon	137226848	137229453	.	-	.	gene_id "RI:1:137226848:137227149-137228977:137229453:-"; transcript_id "RI:1:137226848:137227149-137228977:137229453:-:alternative1";
1	hq_isoforms.fasta.no5merge.collapsed.gff	exon	137661720	137661877	.	-	.	gene_id "RI:1:137661720:137661877-137664281:137664393:-"; transcript_id "RI:1:137661720:137661877-137664281:137664393:-:alternative2";
1	hq_isoforms.fasta.no5merge.collapsed.gff	exon	137664281	137664393	.	-	.	gene_id "RI:1:137661720:137661877-137664281:137664393:-"; transcript_id "RI:1:137661720:137661877-137664281:137664393:-:alternative2";
1	hq_isoforms.fasta.no5merge.collapsed.gff	exon	137661720	137664393	.	-	.	gene_id "RI:1:137661720:137661877-137664281:137664393:-"; transcript_id "RI:1:137661720:137661877-137664281:137664393:-:alternative1";
1	hq_isoforms.fasta.no5merge.collapsed.gff	exon	139811075	139811287	.	-	.	gene_id "RI:1:139811075:139811287-139813919:139814122:-"; transcript_id "RI:1:139811075:139811287-139813919:139814122:-:alternative2";
1	hq_isoforms.fasta.no5merge.collapsed.gff	exon	139813919	139814122	.	-	.	gene_id "RI:1:139811075:139811287-139813919:139814122:-"; transcript_id "RI:1:139811075:139811287-139813919:139814122:-:alternative2";
1	hq_isoforms.fasta.no5merge.collapsed.gff	exon	139811075	139814122	.	-	.	gene_id "RI:1:139811075:139811287-139813919:139814122:-"; transcript_id "RI:1:139811075:139811287-139813919:139814122:-:alternative1";
1	hq_isoforms.fasta.no5merge.collapsed.gff	exon	139882638	139882735	.	-	.	gene_id "RI:1:139882638:139882735-139884128:139884206:-"; transcript_id "RI:1:139882638:139882735-139884128:139884206:-:alternative2";
1	hq_isoforms.fasta.no5merge.collapsed.gff	exon	139884128	139884206	.	-	.	gene_id "RI:1:139882638:139882735-139884128:139884206:-"; transcript_id "RI:1:139882638:139882735-139884128:139884206:-:alternative2";
1	hq_isoforms.fasta.no5merge.collapsed.gff	exon	139882638	139884206	.	-	.	gene_id "RI:1:139882638:139882735-139884128:139884206:-"; transcript_id "RI:1:139882638:139882735-139884128:139884206:-:alternative1";
1	hq_isoforms.fasta.no5merge.collapsed.gff	exon	139880472	139880636	.	-	.	gene_id "RI:1:139880472:139880636-139882638:139882735:-"; transcript_id "RI:1:139880472:139880636-139882638:139882735:-:alternative2";
1	hq_isoforms.fasta.no5merge.collapsed.gff	exon	139882638	139882735	.	-	.	gene_id "RI:1:139880472:139880636-139882638:139882735:-"; transcript_id "RI:1:139880472:139880636-139882638:139882735:-:alternative2";
1	hq_isoforms.fasta.no5merge.collapsed.gff	exon	139880472	139882735	.	-	.	gene_id "RI:1:139880472:139880636-139882638:139882735:-"; transcript_id "RI:1:139880472:139880636-139882638:139882735:-:alternative1";
1	hq_isoforms.fasta.no5merge.collapsed.gff	exon	140575795	140575852	.	-	.	gene_id "RI:1:140575795:140575852-140576972:140577133:-"; transcript_id "RI:1:140575795:140575852-140576972:140577133:-:alternative2";
1	hq_isoforms.fasta.no5merge.collapsed.gff	exon	140576972	140577133	.	-	.	gene_id "RI:1:140575795:140575852-140576972:140577133:-"; transcript_id "RI:1:140575795:140575852-140576972:140577133:-:alternative2";
1	hq_isoforms.fasta.no5merge.collapsed.gff	exon	140575795	140577133	.	-	.	gene_id "RI:1:140575795:140575852-140576972:140577133:-"; transcript_id "RI:1:140575795:140575852-140576972:140577133:-:alternative1";
1	hq_isoforms.fasta.no5merge.collapsed.gff	exon	140587831	140587996	.	-	.	gene_id "RI:1:140587831:140587996-140588436:140588523:-"; transcript_id "RI:1:140587831:140587996-140588436:140588523:-:alternative2";
1	hq_isoforms.fasta.no5merge.collapsed.gff	exon	140588436	140588523	.	-	.	gene_id "RI:1:140587831:140587996-140588436:140588523:-"; transcript_id "RI:1:140587831:140587996-140588436:140588523:-:alternative2";
1	hq_isoforms.fasta.no5merge.collapsed.gff	exon	140587831	140588523	.	-	.	gene_id "RI:1:140587831:140587996-140588436:140588523:-"; transcript_id "RI:1:140587831:140587996-140588436:140588523:-:alternative1";
1	hq_isoforms.fasta.no5merge.collapsed.gff	exon	140599257	140599393	.	-	.	gene_id "RI:1:140599257:140599393-140602523:140603242:-"; transcript_id "RI:1:140599257:140599393-140602523:140603242:-:alternative2";
1	hq_isoforms.fasta.no5merge.collapsed.gff	exon	140602523	140603242	.	-	.	gene_id "RI:1:140599257:140599393-140602523:140603242:-"; transcript_id "RI:1:140599257:140599393-140602523:140603242:-:alternative2";
1	hq_isoforms.fasta.no5merge.collapsed.gff	exon	140599257	140603242	.	-	.	gene_id "RI:1:140599257:140599393-140602523:140603242:-"; transcript_id "RI:1:140599257:140599393-140602523:140603242:-:alternative1";
1	hq_isoforms.fasta.no5merge.collapsed.gff	exon	142048290	142049707	.	-	.	gene_id "RI:1:142048290:142049707-142051951:142052058:-"; transcript_id "RI:1:142048290:142049707-142051951:142052058:-:alternative2";
1	hq_isoforms.fasta.no5merge.collapsed.gff	exon	142051951	142052058	.	-	.	gene_id "RI:1:142048290:142049707-142051951:142052058:-"; transcript_id "RI:1:142048290:142049707-142051951:142052058:-:alternative2";
1	hq_isoforms.fasta.no5merge.collapsed.gff	exon	142048290	142052058	.	-	.	gene_id "RI:1:142048290:142049707-142051951:142052058:-"; transcript_id "RI:1:142048290:142049707-142051951:142052058:-:alternative1";
1	hq_isoforms.fasta.no5merge.collapsed.gff	exon	142129012	142131058	.	-	.	gene_id "RI:1:142129012:142131058-142131760:142131899:-"; transcript_id "RI:1:142129012:142131058-142131760:142131899:-:alternative2";
1	hq_isoforms.fasta.no5merge.collapsed.gff	exon	142131760	142131899	.	-	.	gene_id "RI:1:142129012:142131058-142131760:142131899:-"; transcript_id "RI:1:142129012:142131058-142131760:142131899:-:alternative2";
1	hq_isoforms.fasta.no5merge.collapsed.gff	exon	142129012	142131899	.	-	.	gene_id "RI:1:142129012:142131058-142131760:142131899:-"; transcript_id "RI:1:142129012:142131058-142131760:142131899:-:alternative1";
1	hq_isoforms.fasta.no5merge.collapsed.gff	exon	143157621	143157768	.	-	.	gene_id "RI:1:143157621:143157768-143158014:143158109:-"; transcript_id "RI:1:143157621:143157768-143158014:143158109:-:alternative2";
1	hq_isoforms.fasta.no5merge.collapsed.gff	exon	143158014	143158109	.	-	.	gene_id "RI:1:143157621:143157768-143158014:143158109:-"; transcript_id "RI:1:143157621:143157768-143158014:143158109:-:alternative2";
1	hq_isoforms.fasta.no5merge.collapsed.gff	exon	143157621	143158109	.	-	.	gene_id "RI:1:143157621:143157768-143158014:143158109:-"; transcript_id "RI:1:143157621:143157768-143158014:143158109:-:alternative1";
1	hq_isoforms.fasta.no5merge.collapsed.gff	exon	143246975	143247105	.	-	.	gene_id "RI:1:143246975:143247105-143248333:143248440:-"; transcript_id "RI:1:143246975:143247105-143248333:143248440:-:alternative2";
1	hq_isoforms.fasta.no5merge.collapsed.gff	exon	143248333	143248440	.	-	.	gene_id "RI:1:143246975:143247105-143248333:143248440:-"; transcript_id "RI:1:143246975:143247105-143248333:143248440:-:alternative2";
1	hq_isoforms.fasta.no5merge.collapsed.gff	exon	143246975	143248440	.	-	.	gene_id "RI:1:143246975:143247105-143248333:143248440:-"; transcript_id "RI:1:143246975:143247105-143248333:143248440:-:alternative1";
1	hq_isoforms.fasta.no5merge.collapsed.gff	exon	143940899	143941184	.	-	.	gene_id "RI:1:143940899:143941184-143941427:143942509:-"; transcript_id "RI:1:143940899:143941184-143941427:143942509:-:alternative2";
1	hq_isoforms.fasta.no5merge.collapsed.gff	exon	143941427	143942509	.	-	.	gene_id "RI:1:143940899:143941184-143941427:143942509:-"; transcript_id "RI:1:143940899:143941184-143941427:143942509:-:alternative2";
1	hq_isoforms.fasta.no5merge.collapsed.gff	exon	143940899	143942509	.	-	.	gene_id "RI:1:143940899:143941184-143941427:143942509:-"; transcript_id "RI:1:143940899:143941184-143941427:143942509:-:alternative1";
1	hq_isoforms.fasta.no5merge.collapsed.gff	exon	143948012	143948141	.	-	.	gene_id "RI:1:143948012:143948141-143950546:143950743:-"; transcript_id "RI:1:143948012:143948141-143950546:143950743:-:alternative2";
1	hq_isoforms.fasta.no5merge.collapsed.gff	exon	143950546	143950743	.	-	.	gene_id "RI:1:143948012:143948141-143950546:143950743:-"; transcript_id "RI:1:143948012:143948141-143950546:143950743:-:alternative2";
1	hq_isoforms.fasta.no5merge.collapsed.gff	exon	143948012	143950743	.	-	.	gene_id "RI:1:143948012:143948141-143950546:143950743:-"; transcript_id "RI:1:143948012:143948141-143950546:143950743:-:alternative1";
1	hq_isoforms.fasta.no5merge.collapsed.gff	exon	144272362	144272454	.	-	.	gene_id "RI:1:144272362:144272454-144273724:144273792:-"; transcript_id "RI:1:144272362:144272454-144273724:144273792:-:alternative2";
1	hq_isoforms.fasta.no5merge.collapsed.gff	exon	144273724	144273792	.	-	.	gene_id "RI:1:144272362:144272454-144273724:144273792:-"; transcript_id "RI:1:144272362:144272454-144273724:144273792:-:alternative2";
1	hq_isoforms.fasta.no5merge.collapsed.gff	exon	144272362	144273792	.	-	.	gene_id "RI:1:144272362:144272454-144273724:144273792:-"; transcript_id "RI:1:144272362:144272454-144273724:144273792:-:alternative1";
1	hq_isoforms.fasta.no5merge.collapsed.gff	exon	144268783	144269909	.	-	.	gene_id "RI:1:144268783:144269909-144271249:144271362:-"; transcript_id "RI:1:144268783:144269909-144271249:144271362:-:alternative2";
1	hq_isoforms.fasta.no5merge.collapsed.gff	exon	144271249	144271362	.	-	.	gene_id "RI:1:144268783:144269909-144271249:144271362:-"; transcript_id "RI:1:144268783:144269909-144271249:144271362:-:alternative2";
1	hq_isoforms.fasta.no5merge.collapsed.gff	exon	144268783	144271362	.	-	.	gene_id "RI:1:144268783:144269909-144271249:144271362:-"; transcript_id "RI:1:144268783:144269909-144271249:144271362:-:alternative1";
1	hq_isoforms.fasta.no5merge.collapsed.gff	exon	144268783	144272454	.	-	.	gene_id "RI:1:144268783:144272454-144273724:144273792:-"; transcript_id "RI:1:144268783:144272454-144273724:144273792:-:alternative2";
1	hq_isoforms.fasta.no5merge.collapsed.gff	exon	144273724	144273792	.	-	.	gene_id "RI:1:144268783:144272454-144273724:144273792:-"; transcript_id "RI:1:144268783:144272454-144273724:144273792:-:alternative2";
1	hq_isoforms.fasta.no5merge.collapsed.gff	exon	144268783	144273792	.	-	.	gene_id "RI:1:144268783:144272454-144273724:144273792:-"; transcript_id "RI:1:144268783:144272454-144273724:144273792:-:alternative1";
1	hq_isoforms.fasta.no5merge.collapsed.gff	exon	144268783	144271362	.	-	.	gene_id "RI:1:144268783:144271362-144272362:144273792:-"; transcript_id "RI:1:144268783:144271362-144272362:144273792:-:alternative2";
1	hq_isoforms.fasta.no5merge.collapsed.gff	exon	144272362	144273792	.	-	.	gene_id "RI:1:144268783:144271362-144272362:144273792:-"; transcript_id "RI:1:144268783:144271362-144272362:144273792:-:alternative2";
1	hq_isoforms.fasta.no5merge.collapsed.gff	exon	144268783	144273792	.	-	.	gene_id "RI:1:144268783:144271362-144272362:144273792:-"; transcript_id "RI:1:144268783:144271362-144272362:144273792:-:alternative1";
1	hq_isoforms.fasta.no5merge.collapsed.gff	exon	144274435	144274481	.	-	.	gene_id "RI:1:144274435:144274481-144275705:144275876:-"; transcript_id "RI:1:144274435:144274481-144275705:144275876:-:alternative2";
1	hq_isoforms.fasta.no5merge.collapsed.gff	exon	144275705	144275876	.	-	.	gene_id "RI:1:144274435:144274481-144275705:144275876:-"; transcript_id "RI:1:144274435:144274481-144275705:144275876:-:alternative2";
1	hq_isoforms.fasta.no5merge.collapsed.gff	exon	144274435	144275876	.	-	.	gene_id "RI:1:144274435:144274481-144275705:144275876:-"; transcript_id "RI:1:144274435:144274481-144275705:144275876:-:alternative1";
1	hq_isoforms.fasta.no5merge.collapsed.gff	exon	144296673	144296985	.	-	.	gene_id "RI:1:144296673:144296985-144298751:144298918:-"; transcript_id "RI:1:144296673:144296985-144298751:144298918:-:alternative2";
1	hq_isoforms.fasta.no5merge.collapsed.gff	exon	144298751	144298918	.	-	.	gene_id "RI:1:144296673:144296985-144298751:144298918:-"; transcript_id "RI:1:144296673:144296985-144298751:144298918:-:alternative2";
1	hq_isoforms.fasta.no5merge.collapsed.gff	exon	144296673	144298918	.	-	.	gene_id "RI:1:144296673:144296985-144298751:144298918:-"; transcript_id "RI:1:144296673:144296985-144298751:144298918:-:alternative1";
1	hq_isoforms.fasta.no5merge.collapsed.gff	exon	144295466	144295620	.	-	.	gene_id "RI:1:144295466:144295620-144296673:144298918:-"; transcript_id "RI:1:144295466:144295620-144296673:144298918:-:alternative2";
1	hq_isoforms.fasta.no5merge.collapsed.gff	exon	144296673	144298918	.	-	.	gene_id "RI:1:144295466:144295620-144296673:144298918:-"; transcript_id "RI:1:144295466:144295620-144296673:144298918:-:alternative2";
1	hq_isoforms.fasta.no5merge.collapsed.gff	exon	144295466	144298918	.	-	.	gene_id "RI:1:144295466:144295620-144296673:144298918:-"; transcript_id "RI:1:144295466:144295620-144296673:144298918:-:alternative1";
1	hq_isoforms.fasta.no5merge.collapsed.gff	exon	144319478	144319536	.	-	.	gene_id "RI:1:144319478:144319536-144321600:144321697:-"; transcript_id "RI:1:144319478:144319536-144321600:144321697:-:alternative2";
1	hq_isoforms.fasta.no5merge.collapsed.gff	exon	144321600	144321697	.	-	.	gene_id "RI:1:144319478:144319536-144321600:144321697:-"; transcript_id "RI:1:144319478:144319536-144321600:144321697:-:alternative2";
1	hq_isoforms.fasta.no5merge.collapsed.gff	exon	144319478	144321697	.	-	.	gene_id "RI:1:144319478:144319536-144321600:144321697:-"; transcript_id "RI:1:144319478:144319536-144321600:144321697:-:alternative1";
1	hq_isoforms.fasta.no5merge.collapsed.gff	exon	144599325	144600690	.	-	.	gene_id "RI:1:144599325:144600690-144601099:144601176:-"; transcript_id "RI:1:144599325:144600690-144601099:144601176:-:alternative2";
1	hq_isoforms.fasta.no5merge.collapsed.gff	exon	144601099	144601176	.	-	.	gene_id "RI:1:144599325:144600690-144601099:144601176:-"; transcript_id "RI:1:144599325:144600690-144601099:144601176:-:alternative2";
1	hq_isoforms.fasta.no5merge.collapsed.gff	exon	144599325	144601176	.	-	.	gene_id "RI:1:144599325:144600690-144601099:144601176:-"; transcript_id "RI:1:144599325:144600690-144601099:144601176:-:alternative1";
1	hq_isoforms.fasta.no5merge.collapsed.gff	exon	145583936	145584097	.	-	.	gene_id "RI:1:145583936:145584097-145584637:145584775:-"; transcript_id "RI:1:145583936:145584097-145584637:145584775:-:alternative2";
1	hq_isoforms.fasta.no5merge.collapsed.gff	exon	145584637	145584775	.	-	.	gene_id "RI:1:145583936:145584097-145584637:145584775:-"; transcript_id "RI:1:145583936:145584097-145584637:145584775:-:alternative2";
1	hq_isoforms.fasta.no5merge.collapsed.gff	exon	145583936	145584775	.	-	.	gene_id "RI:1:145583936:145584097-145584637:145584775:-"; transcript_id "RI:1:145583936:145584097-145584637:145584775:-:alternative1";
1	hq_isoforms.fasta.no5merge.collapsed.gff	exon	146260160	146260365	.	-	.	gene_id "RI:1:146260160:146260365-146263939:146264083:-"; transcript_id "RI:1:146260160:146260365-146263939:146264083:-:alternative2";
1	hq_isoforms.fasta.no5merge.collapsed.gff	exon	146263939	146264083	.	-	.	gene_id "RI:1:146260160:146260365-146263939:146264083:-"; transcript_id "RI:1:146260160:146260365-146263939:146264083:-:alternative2";
1	hq_isoforms.fasta.no5merge.collapsed.gff	exon	146260160	146264083	.	-	.	gene_id "RI:1:146260160:146260365-146263939:146264083:-"; transcript_id "RI:1:146260160:146260365-146263939:146264083:-:alternative1";
1	hq_isoforms.fasta.no5merge.collapsed.gff	exon	146414561	146414882	.	-	.	gene_id "RI:1:146414561:146414882-146416234:146416418:-"; transcript_id "RI:1:146414561:146414882-146416234:146416418:-:alternative2";
1	hq_isoforms.fasta.no5merge.collapsed.gff	exon	146416234	146416418	.	-	.	gene_id "RI:1:146414561:146414882-146416234:146416418:-"; transcript_id "RI:1:146414561:146414882-146416234:146416418:-:alternative2";
1	hq_isoforms.fasta.no5merge.collapsed.gff	exon	146414561	146416418	.	-	.	gene_id "RI:1:146414561:146414882-146416234:146416418:-"; transcript_id "RI:1:146414561:146414882-146416234:146416418:-:alternative1";
1	hq_isoforms.fasta.no5merge.collapsed.gff	exon	147675156	147675274	.	-	.	gene_id "RI:1:147675156:147675274-147675365:147675523:-"; transcript_id "RI:1:147675156:147675274-147675365:147675523:-:alternative2";
1	hq_isoforms.fasta.no5merge.collapsed.gff	exon	147675365	147675523	.	-	.	gene_id "RI:1:147675156:147675274-147675365:147675523:-"; transcript_id "RI:1:147675156:147675274-147675365:147675523:-:alternative2";
1	hq_isoforms.fasta.no5merge.collapsed.gff	exon	147675156	147675523	.	-	.	gene_id "RI:1:147675156:147675274-147675365:147675523:-"; transcript_id "RI:1:147675156:147675274-147675365:147675523:-:alternative1";
1	hq_isoforms.fasta.no5merge.collapsed.gff	exon	147655565	147655677	.	-	.	gene_id "RI:1:147655565:147655677-147655770:147655964:-"; transcript_id "RI:1:147655565:147655677-147655770:147655964:-:alternative2";
1	hq_isoforms.fasta.no5merge.collapsed.gff	exon	147655770	147655964	.	-	.	gene_id "RI:1:147655565:147655677-147655770:147655964:-"; transcript_id "RI:1:147655565:147655677-147655770:147655964:-:alternative2";
1	hq_isoforms.fasta.no5merge.collapsed.gff	exon	147655565	147655964	.	-	.	gene_id "RI:1:147655565:147655677-147655770:147655964:-"; transcript_id "RI:1:147655565:147655677-147655770:147655964:-:alternative1";
1	hq_isoforms.fasta.no5merge.collapsed.gff	exon	147692881	147693056	.	-	.	gene_id "RI:1:147692881:147693056-147693632:147693723:-"; transcript_id "RI:1:147692881:147693056-147693632:147693723:-:alternative2";
1	hq_isoforms.fasta.no5merge.collapsed.gff	exon	147693632	147693723	.	-	.	gene_id "RI:1:147692881:147693056-147693632:147693723:-"; transcript_id "RI:1:147692881:147693056-147693632:147693723:-:alternative2";
1	hq_isoforms.fasta.no5merge.collapsed.gff	exon	147692881	147693723	.	-	.	gene_id "RI:1:147692881:147693056-147693632:147693723:-"; transcript_id "RI:1:147692881:147693056-147693632:147693723:-:alternative1";
1	hq_isoforms.fasta.no5merge.collapsed.gff	exon	147693889	147693994	.	-	.	gene_id "RI:1:147693889:147693994-147694740:147694930:-"; transcript_id "RI:1:147693889:147693994-147694740:147694930:-:alternative2";
1	hq_isoforms.fasta.no5merge.collapsed.gff	exon	147694740	147694930	.	-	.	gene_id "RI:1:147693889:147693994-147694740:147694930:-"; transcript_id "RI:1:147693889:147693994-147694740:147694930:-:alternative2";
1	hq_isoforms.fasta.no5merge.collapsed.gff	exon	147693889	147694930	.	-	.	gene_id "RI:1:147693889:147693994-147694740:147694930:-"; transcript_id "RI:1:147693889:147693994-147694740:147694930:-:alternative1";
1	hq_isoforms.fasta.no5merge.collapsed.gff	exon	147696518	147696657	.	-	.	gene_id "RI:1:147696518:147696657-147696807:147696915:-"; transcript_id "RI:1:147696518:147696657-147696807:147696915:-:alternative2";
1	hq_isoforms.fasta.no5merge.collapsed.gff	exon	147696807	147696915	.	-	.	gene_id "RI:1:147696518:147696657-147696807:147696915:-"; transcript_id "RI:1:147696518:147696657-147696807:147696915:-:alternative2";
1	hq_isoforms.fasta.no5merge.collapsed.gff	exon	147696518	147696915	.	-	.	gene_id "RI:1:147696518:147696657-147696807:147696915:-"; transcript_id "RI:1:147696518:147696657-147696807:147696915:-:alternative1";
1	hq_isoforms.fasta.no5merge.collapsed.gff	exon	147712442	147712656	.	-	.	gene_id "RI:1:147712442:147712656-147713262:147713412:-"; transcript_id "RI:1:147712442:147712656-147713262:147713412:-:alternative2";
1	hq_isoforms.fasta.no5merge.collapsed.gff	exon	147713262	147713412	.	-	.	gene_id "RI:1:147712442:147712656-147713262:147713412:-"; transcript_id "RI:1:147712442:147712656-147713262:147713412:-:alternative2";
1	hq_isoforms.fasta.no5merge.collapsed.gff	exon	147712442	147713412	.	-	.	gene_id "RI:1:147712442:147712656-147713262:147713412:-"; transcript_id "RI:1:147712442:147712656-147713262:147713412:-:alternative1";
1	hq_isoforms.fasta.no5merge.collapsed.gff	exon	147718392	147718516	.	-	.	gene_id "RI:1:147718392:147718516-147718589:147718817:-"; transcript_id "RI:1:147718392:147718516-147718589:147718817:-:alternative2";
1	hq_isoforms.fasta.no5merge.collapsed.gff	exon	147718589	147718817	.	-	.	gene_id "RI:1:147718392:147718516-147718589:147718817:-"; transcript_id "RI:1:147718392:147718516-147718589:147718817:-:alternative2";
1	hq_isoforms.fasta.no5merge.collapsed.gff	exon	147718392	147718817	.	-	.	gene_id "RI:1:147718392:147718516-147718589:147718817:-"; transcript_id "RI:1:147718392:147718516-147718589:147718817:-:alternative1";
1	hq_isoforms.fasta.no5merge.collapsed.gff	exon	147814377	147814995	.	-	.	gene_id "RI:1:147814377:147814995-147815606:147815763:-"; transcript_id "RI:1:147814377:147814995-147815606:147815763:-:alternative2";
1	hq_isoforms.fasta.no5merge.collapsed.gff	exon	147815606	147815763	.	-	.	gene_id "RI:1:147814377:147814995-147815606:147815763:-"; transcript_id "RI:1:147814377:147814995-147815606:147815763:-:alternative2";
1	hq_isoforms.fasta.no5merge.collapsed.gff	exon	147814377	147815763	.	-	.	gene_id "RI:1:147814377:147814995-147815606:147815763:-"; transcript_id "RI:1:147814377:147814995-147815606:147815763:-:alternative1";
1	hq_isoforms.fasta.no5merge.collapsed.gff	exon	147821815	147821962	.	-	.	gene_id "RI:1:147821815:147821962-147822760:147822998:-"; transcript_id "RI:1:147821815:147821962-147822760:147822998:-:alternative2";
1	hq_isoforms.fasta.no5merge.collapsed.gff	exon	147822760	147822998	.	-	.	gene_id "RI:1:147821815:147821962-147822760:147822998:-"; transcript_id "RI:1:147821815:147821962-147822760:147822998:-:alternative2";
1	hq_isoforms.fasta.no5merge.collapsed.gff	exon	147821815	147822998	.	-	.	gene_id "RI:1:147821815:147821962-147822760:147822998:-"; transcript_id "RI:1:147821815:147821962-147822760:147822998:-:alternative1";
1	hq_isoforms.fasta.no5merge.collapsed.gff	exon	147822760	147822998	.	-	.	gene_id "RI:1:147822760:147822998-147824207:147824301:-"; transcript_id "RI:1:147822760:147822998-147824207:147824301:-:alternative2";
1	hq_isoforms.fasta.no5merge.collapsed.gff	exon	147824207	147824301	.	-	.	gene_id "RI:1:147822760:147822998-147824207:147824301:-"; transcript_id "RI:1:147822760:147822998-147824207:147824301:-:alternative2";
1	hq_isoforms.fasta.no5merge.collapsed.gff	exon	147822760	147824301	.	-	.	gene_id "RI:1:147822760:147822998-147824207:147824301:-"; transcript_id "RI:1:147822760:147822998-147824207:147824301:-:alternative1";
1	hq_isoforms.fasta.no5merge.collapsed.gff	exon	147825511	147825583	.	-	.	gene_id "RI:1:147825511:147825583-147826527:147826703:-"; transcript_id "RI:1:147825511:147825583-147826527:147826703:-:alternative2";
1	hq_isoforms.fasta.no5merge.collapsed.gff	exon	147826527	147826703	.	-	.	gene_id "RI:1:147825511:147825583-147826527:147826703:-"; transcript_id "RI:1:147825511:147825583-147826527:147826703:-:alternative2";
1	hq_isoforms.fasta.no5merge.collapsed.gff	exon	147825511	147826703	.	-	.	gene_id "RI:1:147825511:147825583-147826527:147826703:-"; transcript_id "RI:1:147825511:147825583-147826527:147826703:-:alternative1";
1	hq_isoforms.fasta.no5merge.collapsed.gff	exon	148265771	148265845	.	-	.	gene_id "RI:1:148265771:148265845-148266536:148266638:-"; transcript_id "RI:1:148265771:148265845-148266536:148266638:-:alternative2";
1	hq_isoforms.fasta.no5merge.collapsed.gff	exon	148266536	148266638	.	-	.	gene_id "RI:1:148265771:148265845-148266536:148266638:-"; transcript_id "RI:1:148265771:148265845-148266536:148266638:-:alternative2";
1	hq_isoforms.fasta.no5merge.collapsed.gff	exon	148265771	148266638	.	-	.	gene_id "RI:1:148265771:148265845-148266536:148266638:-"; transcript_id "RI:1:148265771:148265845-148266536:148266638:-:alternative1";
1	hq_isoforms.fasta.no5merge.collapsed.gff	exon	148259508	148259556	.	-	.	gene_id "RI:1:148259508:148259556-148262220:148262306:-"; transcript_id "RI:1:148259508:148259556-148262220:148262306:-:alternative2";
1	hq_isoforms.fasta.no5merge.collapsed.gff	exon	148262220	148262306	.	-	.	gene_id "RI:1:148259508:148259556-148262220:148262306:-"; transcript_id "RI:1:148259508:148259556-148262220:148262306:-:alternative2";
1	hq_isoforms.fasta.no5merge.collapsed.gff	exon	148259508	148262306	.	-	.	gene_id "RI:1:148259508:148259556-148262220:148262306:-"; transcript_id "RI:1:148259508:148259556-148262220:148262306:-:alternative1";
1	hq_isoforms.fasta.no5merge.collapsed.gff	exon	148259508	148261802	.	-	.	gene_id "RI:1:148259508:148261802-148262220:148262306:-"; transcript_id "RI:1:148259508:148261802-148262220:148262306:-:alternative2";
1	hq_isoforms.fasta.no5merge.collapsed.gff	exon	148262220	148262306	.	-	.	gene_id "RI:1:148259508:148261802-148262220:148262306:-"; transcript_id "RI:1:148259508:148261802-148262220:148262306:-:alternative2";
1	hq_isoforms.fasta.no5merge.collapsed.gff	exon	148259508	148262306	.	-	.	gene_id "RI:1:148259508:148261802-148262220:148262306:-"; transcript_id "RI:1:148259508:148261802-148262220:148262306:-:alternative1";
1	hq_isoforms.fasta.no5merge.collapsed.gff	exon	148265771	148266638	.	-	.	gene_id "RI:1:148265771:148266638-148267184:148267287:-"; transcript_id "RI:1:148265771:148266638-148267184:148267287:-:alternative2";
1	hq_isoforms.fasta.no5merge.collapsed.gff	exon	148267184	148267287	.	-	.	gene_id "RI:1:148265771:148266638-148267184:148267287:-"; transcript_id "RI:1:148265771:148266638-148267184:148267287:-:alternative2";
1	hq_isoforms.fasta.no5merge.collapsed.gff	exon	148265771	148267287	.	-	.	gene_id "RI:1:148265771:148266638-148267184:148267287:-"; transcript_id "RI:1:148265771:148266638-148267184:148267287:-:alternative1";
1	hq_isoforms.fasta.no5merge.collapsed.gff	exon	148248859	148250035	.	-	.	gene_id "RI:1:148248859:148250035-148253596:148253702:-"; transcript_id "RI:1:148248859:148250035-148253596:148253702:-:alternative2";
1	hq_isoforms.fasta.no5merge.collapsed.gff	exon	148253596	148253702	.	-	.	gene_id "RI:1:148248859:148250035-148253596:148253702:-"; transcript_id "RI:1:148248859:148250035-148253596:148253702:-:alternative2";
1	hq_isoforms.fasta.no5merge.collapsed.gff	exon	148248859	148253702	.	-	.	gene_id "RI:1:148248859:148250035-148253596:148253702:-"; transcript_id "RI:1:148248859:148250035-148253596:148253702:-:alternative1";
1	hq_isoforms.fasta.no5merge.collapsed.gff	exon	148259508	148259556	.	-	.	gene_id "RI:1:148259508:148259556-148261646:148261802:-"; transcript_id "RI:1:148259508:148259556-148261646:148261802:-:alternative2";
1	hq_isoforms.fasta.no5merge.collapsed.gff	exon	148261646	148261802	.	-	.	gene_id "RI:1:148259508:148259556-148261646:148261802:-"; transcript_id "RI:1:148259508:148259556-148261646:148261802:-:alternative2";
1	hq_isoforms.fasta.no5merge.collapsed.gff	exon	148259508	148261802	.	-	.	gene_id "RI:1:148259508:148259556-148261646:148261802:-"; transcript_id "RI:1:148259508:148259556-148261646:148261802:-:alternative1";
1	hq_isoforms.fasta.no5merge.collapsed.gff	exon	150596752	150597308	.	-	.	gene_id "RI:1:150596752:150597308-150597316:150600391:-"; transcript_id "RI:1:150596752:150597308-150597316:150600391:-:alternative2";
1	hq_isoforms.fasta.no5merge.collapsed.gff	exon	150597316	150600391	.	-	.	gene_id "RI:1:150596752:150597308-150597316:150600391:-"; transcript_id "RI:1:150596752:150597308-150597316:150600391:-:alternative2";
1	hq_isoforms.fasta.no5merge.collapsed.gff	exon	150596752	150600391	.	-	.	gene_id "RI:1:150596752:150597308-150597316:150600391:-"; transcript_id "RI:1:150596752:150597308-150597316:150600391:-:alternative1";
1	hq_isoforms.fasta.no5merge.collapsed.gff	exon	150673207	150673343	.	-	.	gene_id "RI:1:150673207:150673343-150675177:150675224:-"; transcript_id "RI:1:150673207:150673343-150675177:150675224:-:alternative2";
1	hq_isoforms.fasta.no5merge.collapsed.gff	exon	150675177	150675224	.	-	.	gene_id "RI:1:150673207:150673343-150675177:150675224:-"; transcript_id "RI:1:150673207:150673343-150675177:150675224:-:alternative2";
1	hq_isoforms.fasta.no5merge.collapsed.gff	exon	150673207	150675224	.	-	.	gene_id "RI:1:150673207:150673343-150675177:150675224:-"; transcript_id "RI:1:150673207:150673343-150675177:150675224:-:alternative1";
1	hq_isoforms.fasta.no5merge.collapsed.gff	exon	150673207	150673274	.	-	.	gene_id "RI:1:150673207:150673274-150675177:150675224:-"; transcript_id "RI:1:150673207:150673274-150675177:150675224:-:alternative2";
1	hq_isoforms.fasta.no5merge.collapsed.gff	exon	150675177	150675224	.	-	.	gene_id "RI:1:150673207:150673274-150675177:150675224:-"; transcript_id "RI:1:150673207:150673274-150675177:150675224:-:alternative2";
1	hq_isoforms.fasta.no5merge.collapsed.gff	exon	150673207	150675224	.	-	.	gene_id "RI:1:150673207:150673274-150675177:150675224:-"; transcript_id "RI:1:150673207:150673274-150675177:150675224:-:alternative1";
1	hq_isoforms.fasta.no5merge.collapsed.gff	exon	150649643	150649743	.	-	.	gene_id "RI:1:150649643:150649743-150650866:150651056:-"; transcript_id "RI:1:150649643:150649743-150650866:150651056:-:alternative2";
1	hq_isoforms.fasta.no5merge.collapsed.gff	exon	150650866	150651056	.	-	.	gene_id "RI:1:150649643:150649743-150650866:150651056:-"; transcript_id "RI:1:150649643:150649743-150650866:150651056:-:alternative2";
1	hq_isoforms.fasta.no5merge.collapsed.gff	exon	150649643	150651056	.	-	.	gene_id "RI:1:150649643:150649743-150650866:150651056:-"; transcript_id "RI:1:150649643:150649743-150650866:150651056:-:alternative1";
1	hq_isoforms.fasta.no5merge.collapsed.gff	exon	150691286	150691397	.	-	.	gene_id "RI:1:150691286:150691397-150692031:150692114:-"; transcript_id "RI:1:150691286:150691397-150692031:150692114:-:alternative2";
1	hq_isoforms.fasta.no5merge.collapsed.gff	exon	150692031	150692114	.	-	.	gene_id "RI:1:150691286:150691397-150692031:150692114:-"; transcript_id "RI:1:150691286:150691397-150692031:150692114:-:alternative2";
1	hq_isoforms.fasta.no5merge.collapsed.gff	exon	150691286	150692114	.	-	.	gene_id "RI:1:150691286:150691397-150692031:150692114:-"; transcript_id "RI:1:150691286:150691397-150692031:150692114:-:alternative1";
1	hq_isoforms.fasta.no5merge.collapsed.gff	exon	152674319	152674461	.	-	.	gene_id "RI:1:152674319:152674461-152675356:152675492:-"; transcript_id "RI:1:152674319:152674461-152675356:152675492:-:alternative2";
1	hq_isoforms.fasta.no5merge.collapsed.gff	exon	152675356	152675492	.	-	.	gene_id "RI:1:152674319:152674461-152675356:152675492:-"; transcript_id "RI:1:152674319:152674461-152675356:152675492:-:alternative2";
1	hq_isoforms.fasta.no5merge.collapsed.gff	exon	152674319	152675492	.	-	.	gene_id "RI:1:152674319:152674461-152675356:152675492:-"; transcript_id "RI:1:152674319:152674461-152675356:152675492:-:alternative1";
1	hq_isoforms.fasta.no5merge.collapsed.gff	exon	152749930	152750159	.	-	.	gene_id "RI:1:152749930:152750159-152750558:152750675:-"; transcript_id "RI:1:152749930:152750159-152750558:152750675:-:alternative2";
1	hq_isoforms.fasta.no5merge.collapsed.gff	exon	152750558	152750675	.	-	.	gene_id "RI:1:152749930:152750159-152750558:152750675:-"; transcript_id "RI:1:152749930:152750159-152750558:152750675:-:alternative2";
1	hq_isoforms.fasta.no5merge.collapsed.gff	exon	152749930	152750675	.	-	.	gene_id "RI:1:152749930:152750159-152750558:152750675:-"; transcript_id "RI:1:152749930:152750159-152750558:152750675:-:alternative1";
1	hq_isoforms.fasta.no5merge.collapsed.gff	exon	152749930	152750121	.	-	.	gene_id "RI:1:152749930:152750121-152750558:152750675:-"; transcript_id "RI:1:152749930:152750121-152750558:152750675:-:alternative2";
1	hq_isoforms.fasta.no5merge.collapsed.gff	exon	152750558	152750675	.	-	.	gene_id "RI:1:152749930:152750121-152750558:152750675:-"; transcript_id "RI:1:152749930:152750121-152750558:152750675:-:alternative2";
1	hq_isoforms.fasta.no5merge.collapsed.gff	exon	152749930	152750675	.	-	.	gene_id "RI:1:152749930:152750121-152750558:152750675:-"; transcript_id "RI:1:152749930:152750121-152750558:152750675:-:alternative1";
1	hq_isoforms.fasta.no5merge.collapsed.gff	exon	152753543	152753689	.	-	.	gene_id "RI:1:152753543:152753689-152754490:152754690:-"; transcript_id "RI:1:152753543:152753689-152754490:152754690:-:alternative2";
1	hq_isoforms.fasta.no5merge.collapsed.gff	exon	152754490	152754690	.	-	.	gene_id "RI:1:152753543:152753689-152754490:152754690:-"; transcript_id "RI:1:152753543:152753689-152754490:152754690:-:alternative2";
1	hq_isoforms.fasta.no5merge.collapsed.gff	exon	152753543	152754690	.	-	.	gene_id "RI:1:152753543:152753689-152754490:152754690:-"; transcript_id "RI:1:152753543:152753689-152754490:152754690:-:alternative1";
1	hq_isoforms.fasta.no5merge.collapsed.gff	exon	154695210	154695417	.	-	.	gene_id "RI:1:154695210:154695417-154695501:154696343:-"; transcript_id "RI:1:154695210:154695417-154695501:154696343:-:alternative2";
1	hq_isoforms.fasta.no5merge.collapsed.gff	exon	154695501	154696343	.	-	.	gene_id "RI:1:154695210:154695417-154695501:154696343:-"; transcript_id "RI:1:154695210:154695417-154695501:154696343:-:alternative2";
1	hq_isoforms.fasta.no5merge.collapsed.gff	exon	154695210	154696343	.	-	.	gene_id "RI:1:154695210:154695417-154695501:154696343:-"; transcript_id "RI:1:154695210:154695417-154695501:154696343:-:alternative1";
1	hq_isoforms.fasta.no5merge.collapsed.gff	exon	154705285	154705368	.	-	.	gene_id "RI:1:154705285:154705368-154705753:154707919:-"; transcript_id "RI:1:154705285:154705368-154705753:154707919:-:alternative2";
1	hq_isoforms.fasta.no5merge.collapsed.gff	exon	154705753	154707919	.	-	.	gene_id "RI:1:154705285:154705368-154705753:154707919:-"; transcript_id "RI:1:154705285:154705368-154705753:154707919:-:alternative2";
1	hq_isoforms.fasta.no5merge.collapsed.gff	exon	154705285	154707919	.	-	.	gene_id "RI:1:154705285:154705368-154705753:154707919:-"; transcript_id "RI:1:154705285:154705368-154705753:154707919:-:alternative1";
1	hq_isoforms.fasta.no5merge.collapsed.gff	exon	154705285	154705368	.	-	.	gene_id "RI:1:154705285:154705368-154705803:154707919:-"; transcript_id "RI:1:154705285:154705368-154705803:154707919:-:alternative2";
1	hq_isoforms.fasta.no5merge.collapsed.gff	exon	154705803	154707919	.	-	.	gene_id "RI:1:154705285:154705368-154705803:154707919:-"; transcript_id "RI:1:154705285:154705368-154705803:154707919:-:alternative2";
1	hq_isoforms.fasta.no5merge.collapsed.gff	exon	154705285	154707919	.	-	.	gene_id "RI:1:154705285:154705368-154705803:154707919:-"; transcript_id "RI:1:154705285:154705368-154705803:154707919:-:alternative1";
1	hq_isoforms.fasta.no5merge.collapsed.gff	exon	154705285	154705368	.	-	.	gene_id "RI:1:154705285:154705368-154707694:154707919:-"; transcript_id "RI:1:154705285:154705368-154707694:154707919:-:alternative2";
1	hq_isoforms.fasta.no5merge.collapsed.gff	exon	154707694	154707919	.	-	.	gene_id "RI:1:154705285:154705368-154707694:154707919:-"; transcript_id "RI:1:154705285:154705368-154707694:154707919:-:alternative2";
1	hq_isoforms.fasta.no5merge.collapsed.gff	exon	154705285	154707919	.	-	.	gene_id "RI:1:154705285:154705368-154707694:154707919:-"; transcript_id "RI:1:154705285:154705368-154707694:154707919:-:alternative1";
1	hq_isoforms.fasta.no5merge.collapsed.gff	exon	154705803	154705863	.	-	.	gene_id "RI:1:154705803:154705863-154707693:154707919:-"; transcript_id "RI:1:154705803:154705863-154707693:154707919:-:alternative2";
1	hq_isoforms.fasta.no5merge.collapsed.gff	exon	154707693	154707919	.	-	.	gene_id "RI:1:154705803:154705863-154707693:154707919:-"; transcript_id "RI:1:154705803:154705863-154707693:154707919:-:alternative2";
1	hq_isoforms.fasta.no5merge.collapsed.gff	exon	154705803	154707919	.	-	.	gene_id "RI:1:154705803:154705863-154707693:154707919:-"; transcript_id "RI:1:154705803:154705863-154707693:154707919:-:alternative1";
1	hq_isoforms.fasta.no5merge.collapsed.gff	exon	156527189	156529496	.	-	.	gene_id "RI:1:156527189:156529496-156529570:156531069:-"; transcript_id "RI:1:156527189:156529496-156529570:156531069:-:alternative2";
1	hq_isoforms.fasta.no5merge.collapsed.gff	exon	156529570	156531069	.	-	.	gene_id "RI:1:156527189:156529496-156529570:156531069:-"; transcript_id "RI:1:156527189:156529496-156529570:156531069:-:alternative2";
1	hq_isoforms.fasta.no5merge.collapsed.gff	exon	156527189	156531069	.	-	.	gene_id "RI:1:156527189:156529496-156529570:156531069:-"; transcript_id "RI:1:156527189:156529496-156529570:156531069:-:alternative1";
1	hq_isoforms.fasta.no5merge.collapsed.gff	exon	156664970	156664985	.	-	.	gene_id "RI:1:156664970:156664985-156665777:156665825:-"; transcript_id "RI:1:156664970:156664985-156665777:156665825:-:alternative2";
1	hq_isoforms.fasta.no5merge.collapsed.gff	exon	156665777	156665825	.	-	.	gene_id "RI:1:156664970:156664985-156665777:156665825:-"; transcript_id "RI:1:156664970:156664985-156665777:156665825:-:alternative2";
1	hq_isoforms.fasta.no5merge.collapsed.gff	exon	156664970	156665825	.	-	.	gene_id "RI:1:156664970:156664985-156665777:156665825:-"; transcript_id "RI:1:156664970:156664985-156665777:156665825:-:alternative1";
1	hq_isoforms.fasta.no5merge.collapsed.gff	exon	156631727	156631847	.	-	.	gene_id "RI:1:156631727:156631847-156632145:156632249:-"; transcript_id "RI:1:156631727:156631847-156632145:156632249:-:alternative2";
1	hq_isoforms.fasta.no5merge.collapsed.gff	exon	156632145	156632249	.	-	.	gene_id "RI:1:156631727:156631847-156632145:156632249:-"; transcript_id "RI:1:156631727:156631847-156632145:156632249:-:alternative2";
1	hq_isoforms.fasta.no5merge.collapsed.gff	exon	156631727	156632249	.	-	.	gene_id "RI:1:156631727:156631847-156632145:156632249:-"; transcript_id "RI:1:156631727:156631847-156632145:156632249:-:alternative1";
1	hq_isoforms.fasta.no5merge.collapsed.gff	exon	156725922	156726630	.	-	.	gene_id "RI:1:156725922:156726630-156727426:156727659:-"; transcript_id "RI:1:156725922:156726630-156727426:156727659:-:alternative2";
1	hq_isoforms.fasta.no5merge.collapsed.gff	exon	156727426	156727659	.	-	.	gene_id "RI:1:156725922:156726630-156727426:156727659:-"; transcript_id "RI:1:156725922:156726630-156727426:156727659:-:alternative2";
1	hq_isoforms.fasta.no5merge.collapsed.gff	exon	156725922	156727659	.	-	.	gene_id "RI:1:156725922:156726630-156727426:156727659:-"; transcript_id "RI:1:156725922:156726630-156727426:156727659:-:alternative1";
1	hq_isoforms.fasta.no5merge.collapsed.gff	exon	156754980	156755052	.	-	.	gene_id "RI:1:156754980:156755052-156757093:156757259:-"; transcript_id "RI:1:156754980:156755052-156757093:156757259:-:alternative2";
1	hq_isoforms.fasta.no5merge.collapsed.gff	exon	156757093	156757259	.	-	.	gene_id "RI:1:156754980:156755052-156757093:156757259:-"; transcript_id "RI:1:156754980:156755052-156757093:156757259:-:alternative2";
1	hq_isoforms.fasta.no5merge.collapsed.gff	exon	156754980	156757259	.	-	.	gene_id "RI:1:156754980:156755052-156757093:156757259:-"; transcript_id "RI:1:156754980:156755052-156757093:156757259:-:alternative1";
1	hq_isoforms.fasta.no5merge.collapsed.gff	exon	156764708	156764767	.	-	.	gene_id "RI:1:156764708:156764767-156765949:156765993:-"; transcript_id "RI:1:156764708:156764767-156765949:156765993:-:alternative2";
1	hq_isoforms.fasta.no5merge.collapsed.gff	exon	156765949	156765993	.	-	.	gene_id "RI:1:156764708:156764767-156765949:156765993:-"; transcript_id "RI:1:156764708:156764767-156765949:156765993:-:alternative2";
1	hq_isoforms.fasta.no5merge.collapsed.gff	exon	156764708	156765993	.	-	.	gene_id "RI:1:156764708:156764767-156765949:156765993:-"; transcript_id "RI:1:156764708:156764767-156765949:156765993:-:alternative1";
1	hq_isoforms.fasta.no5merge.collapsed.gff	exon	156947803	156950687	.	-	.	gene_id "RI:1:156947803:156950687-156950992:156951130:-"; transcript_id "RI:1:156947803:156950687-156950992:156951130:-:alternative2";
1	hq_isoforms.fasta.no5merge.collapsed.gff	exon	156950992	156951130	.	-	.	gene_id "RI:1:156947803:156950687-156950992:156951130:-"; transcript_id "RI:1:156947803:156950687-156950992:156951130:-:alternative2";
1	hq_isoforms.fasta.no5merge.collapsed.gff	exon	156947803	156951130	.	-	.	gene_id "RI:1:156947803:156950687-156950992:156951130:-"; transcript_id "RI:1:156947803:156950687-156950992:156951130:-:alternative1";
1	hq_isoforms.fasta.no5merge.collapsed.gff	exon	157591419	157591484	.	-	.	gene_id "RI:1:157591419:157591484-157593735:157593845:-"; transcript_id "RI:1:157591419:157591484-157593735:157593845:-:alternative2";
1	hq_isoforms.fasta.no5merge.collapsed.gff	exon	157593735	157593845	.	-	.	gene_id "RI:1:157591419:157591484-157593735:157593845:-"; transcript_id "RI:1:157591419:157591484-157593735:157593845:-:alternative2";
1	hq_isoforms.fasta.no5merge.collapsed.gff	exon	157591419	157593845	.	-	.	gene_id "RI:1:157591419:157591484-157593735:157593845:-"; transcript_id "RI:1:157591419:157591484-157593735:157593845:-:alternative1";
1	hq_isoforms.fasta.no5merge.collapsed.gff	exon	157860574	157860709	.	-	.	gene_id "RI:1:157860574:157860709-157862547:157862736:-"; transcript_id "RI:1:157860574:157860709-157862547:157862736:-:alternative2";
1	hq_isoforms.fasta.no5merge.collapsed.gff	exon	157862547	157862736	.	-	.	gene_id "RI:1:157860574:157860709-157862547:157862736:-"; transcript_id "RI:1:157860574:157860709-157862547:157862736:-:alternative2";
1	hq_isoforms.fasta.no5merge.collapsed.gff	exon	157860574	157862736	.	-	.	gene_id "RI:1:157860574:157860709-157862547:157862736:-"; transcript_id "RI:1:157860574:157860709-157862547:157862736:-:alternative1";
1	hq_isoforms.fasta.no5merge.collapsed.gff	exon	158198467	158198537	.	-	.	gene_id "RI:1:158198467:158198537-158199552:158199632:-"; transcript_id "RI:1:158198467:158198537-158199552:158199632:-:alternative2";
1	hq_isoforms.fasta.no5merge.collapsed.gff	exon	158199552	158199632	.	-	.	gene_id "RI:1:158198467:158198537-158199552:158199632:-"; transcript_id "RI:1:158198467:158198537-158199552:158199632:-:alternative2";
1	hq_isoforms.fasta.no5merge.collapsed.gff	exon	158198467	158199632	.	-	.	gene_id "RI:1:158198467:158198537-158199552:158199632:-"; transcript_id "RI:1:158198467:158198537-158199552:158199632:-:alternative1";
1	hq_isoforms.fasta.no5merge.collapsed.gff	exon	158271535	158272469	.	-	.	gene_id "RI:1:158271535:158272469-158273454:158273577:-"; transcript_id "RI:1:158271535:158272469-158273454:158273577:-:alternative2";
1	hq_isoforms.fasta.no5merge.collapsed.gff	exon	158273454	158273577	.	-	.	gene_id "RI:1:158271535:158272469-158273454:158273577:-"; transcript_id "RI:1:158271535:158272469-158273454:158273577:-:alternative2";
1	hq_isoforms.fasta.no5merge.collapsed.gff	exon	158271535	158273577	.	-	.	gene_id "RI:1:158271535:158272469-158273454:158273577:-"; transcript_id "RI:1:158271535:158272469-158273454:158273577:-:alternative1";
1	hq_isoforms.fasta.no5merge.collapsed.gff	exon	158279389	158279430	.	-	.	gene_id "RI:1:158279389:158279430-158279959:158280024:-"; transcript_id "RI:1:158279389:158279430-158279959:158280024:-:alternative2";
1	hq_isoforms.fasta.no5merge.collapsed.gff	exon	158279959	158280024	.	-	.	gene_id "RI:1:158279389:158279430-158279959:158280024:-"; transcript_id "RI:1:158279389:158279430-158279959:158280024:-:alternative2";
1	hq_isoforms.fasta.no5merge.collapsed.gff	exon	158279389	158280024	.	-	.	gene_id "RI:1:158279389:158279430-158279959:158280024:-"; transcript_id "RI:1:158279389:158279430-158279959:158280024:-:alternative1";
1	hq_isoforms.fasta.no5merge.collapsed.gff	exon	158279389	158280024	.	-	.	gene_id "RI:1:158279389:158280024-158280736:158280809:-"; transcript_id "RI:1:158279389:158280024-158280736:158280809:-:alternative2";
1	hq_isoforms.fasta.no5merge.collapsed.gff	exon	158280736	158280809	.	-	.	gene_id "RI:1:158279389:158280024-158280736:158280809:-"; transcript_id "RI:1:158279389:158280024-158280736:158280809:-:alternative2";
1	hq_isoforms.fasta.no5merge.collapsed.gff	exon	158279389	158280809	.	-	.	gene_id "RI:1:158279389:158280024-158280736:158280809:-"; transcript_id "RI:1:158279389:158280024-158280736:158280809:-:alternative1";
1	hq_isoforms.fasta.no5merge.collapsed.gff	exon	158279389	158280024	.	-	.	gene_id "RI:1:158279389:158280024-158280715:158280809:-"; transcript_id "RI:1:158279389:158280024-158280715:158280809:-:alternative2";
1	hq_isoforms.fasta.no5merge.collapsed.gff	exon	158280715	158280809	.	-	.	gene_id "RI:1:158279389:158280024-158280715:158280809:-"; transcript_id "RI:1:158279389:158280024-158280715:158280809:-:alternative2";
1	hq_isoforms.fasta.no5merge.collapsed.gff	exon	158279389	158280809	.	-	.	gene_id "RI:1:158279389:158280024-158280715:158280809:-"; transcript_id "RI:1:158279389:158280024-158280715:158280809:-:alternative1";
1	hq_isoforms.fasta.no5merge.collapsed.gff	exon	158444382	158444512	.	-	.	gene_id "RI:1:158444382:158444512-158447050:158447218:-"; transcript_id "RI:1:158444382:158444512-158447050:158447218:-:alternative2";
1	hq_isoforms.fasta.no5merge.collapsed.gff	exon	158447050	158447218	.	-	.	gene_id "RI:1:158444382:158444512-158447050:158447218:-"; transcript_id "RI:1:158444382:158444512-158447050:158447218:-:alternative2";
1	hq_isoforms.fasta.no5merge.collapsed.gff	exon	158444382	158447218	.	-	.	gene_id "RI:1:158444382:158444512-158447050:158447218:-"; transcript_id "RI:1:158444382:158444512-158447050:158447218:-:alternative1";
1	hq_isoforms.fasta.no5merge.collapsed.gff	exon	158733321	158733400	.	-	.	gene_id "RI:1:158733321:158733400-158736867:158736939:-"; transcript_id "RI:1:158733321:158733400-158736867:158736939:-:alternative2";
1	hq_isoforms.fasta.no5merge.collapsed.gff	exon	158736867	158736939	.	-	.	gene_id "RI:1:158733321:158733400-158736867:158736939:-"; transcript_id "RI:1:158733321:158733400-158736867:158736939:-:alternative2";
1	hq_isoforms.fasta.no5merge.collapsed.gff	exon	158733321	158736939	.	-	.	gene_id "RI:1:158733321:158733400-158736867:158736939:-"; transcript_id "RI:1:158733321:158733400-158736867:158736939:-:alternative1";
1	hq_isoforms.fasta.no5merge.collapsed.gff	exon	159387239	159387343	.	-	.	gene_id "RI:1:159387239:159387343-159388193:159388363:-"; transcript_id "RI:1:159387239:159387343-159388193:159388363:-:alternative2";
1	hq_isoforms.fasta.no5merge.collapsed.gff	exon	159388193	159388363	.	-	.	gene_id "RI:1:159387239:159387343-159388193:159388363:-"; transcript_id "RI:1:159387239:159387343-159388193:159388363:-:alternative2";
1	hq_isoforms.fasta.no5merge.collapsed.gff	exon	159387239	159388363	.	-	.	gene_id "RI:1:159387239:159387343-159388193:159388363:-"; transcript_id "RI:1:159387239:159387343-159388193:159388363:-:alternative1";
1	hq_isoforms.fasta.no5merge.collapsed.gff	exon	159386557	159386633	.	-	.	gene_id "RI:1:159386557:159386633-159387239:159388363:-"; transcript_id "RI:1:159386557:159386633-159387239:159388363:-:alternative2";
1	hq_isoforms.fasta.no5merge.collapsed.gff	exon	159387239	159388363	.	-	.	gene_id "RI:1:159386557:159386633-159387239:159388363:-"; transcript_id "RI:1:159386557:159386633-159387239:159388363:-:alternative2";
1	hq_isoforms.fasta.no5merge.collapsed.gff	exon	159386557	159388363	.	-	.	gene_id "RI:1:159386557:159386633-159387239:159388363:-"; transcript_id "RI:1:159386557:159386633-159387239:159388363:-:alternative1";
1	hq_isoforms.fasta.no5merge.collapsed.gff	exon	160291898	160291955	.	-	.	gene_id "RI:1:160291898:160291955-160293994:160294097:-"; transcript_id "RI:1:160291898:160291955-160293994:160294097:-:alternative2";
1	hq_isoforms.fasta.no5merge.collapsed.gff	exon	160293994	160294097	.	-	.	gene_id "RI:1:160291898:160291955-160293994:160294097:-"; transcript_id "RI:1:160291898:160291955-160293994:160294097:-:alternative2";
1	hq_isoforms.fasta.no5merge.collapsed.gff	exon	160291898	160294097	.	-	.	gene_id "RI:1:160291898:160291955-160293994:160294097:-"; transcript_id "RI:1:160291898:160291955-160293994:160294097:-:alternative1";
1	hq_isoforms.fasta.no5merge.collapsed.gff	exon	160655077	160655245	.	-	.	gene_id "RI:1:160655077:160655245-160657853:160657928:-"; transcript_id "RI:1:160655077:160655245-160657853:160657928:-:alternative2";
1	hq_isoforms.fasta.no5merge.collapsed.gff	exon	160657853	160657928	.	-	.	gene_id "RI:1:160655077:160655245-160657853:160657928:-"; transcript_id "RI:1:160655077:160655245-160657853:160657928:-:alternative2";
1	hq_isoforms.fasta.no5merge.collapsed.gff	exon	160655077	160657928	.	-	.	gene_id "RI:1:160655077:160655245-160657853:160657928:-"; transcript_id "RI:1:160655077:160655245-160657853:160657928:-:alternative1";
1	hq_isoforms.fasta.no5merge.collapsed.gff	exon	162106187	162106259	.	-	.	gene_id "RI:1:162106187:162106259-162106948:162107123:-"; transcript_id "RI:1:162106187:162106259-162106948:162107123:-:alternative2";
1	hq_isoforms.fasta.no5merge.collapsed.gff	exon	162106948	162107123	.	-	.	gene_id "RI:1:162106187:162106259-162106948:162107123:-"; transcript_id "RI:1:162106187:162106259-162106948:162107123:-:alternative2";
1	hq_isoforms.fasta.no5merge.collapsed.gff	exon	162106187	162107123	.	-	.	gene_id "RI:1:162106187:162106259-162106948:162107123:-"; transcript_id "RI:1:162106187:162106259-162106948:162107123:-:alternative1";
1	hq_isoforms.fasta.no5merge.collapsed.gff	exon	162106187	162106251	.	-	.	gene_id "RI:1:162106187:162106251-162106949:162107123:-"; transcript_id "RI:1:162106187:162106251-162106949:162107123:-:alternative2";
1	hq_isoforms.fasta.no5merge.collapsed.gff	exon	162106949	162107123	.	-	.	gene_id "RI:1:162106187:162106251-162106949:162107123:-"; transcript_id "RI:1:162106187:162106251-162106949:162107123:-:alternative2";
1	hq_isoforms.fasta.no5merge.collapsed.gff	exon	162106187	162107123	.	-	.	gene_id "RI:1:162106187:162106251-162106949:162107123:-"; transcript_id "RI:1:162106187:162106251-162106949:162107123:-:alternative1";
1	hq_isoforms.fasta.no5merge.collapsed.gff	exon	162845403	162845551	.	-	.	gene_id "RI:1:162845403:162845551-162846357:162846489:-"; transcript_id "RI:1:162845403:162845551-162846357:162846489:-:alternative2";
1	hq_isoforms.fasta.no5merge.collapsed.gff	exon	162846357	162846489	.	-	.	gene_id "RI:1:162845403:162845551-162846357:162846489:-"; transcript_id "RI:1:162845403:162845551-162846357:162846489:-:alternative2";
1	hq_isoforms.fasta.no5merge.collapsed.gff	exon	162845403	162846489	.	-	.	gene_id "RI:1:162845403:162845551-162846357:162846489:-"; transcript_id "RI:1:162845403:162845551-162846357:162846489:-:alternative1";
1	hq_isoforms.fasta.no5merge.collapsed.gff	exon	162850277	162850382	.	-	.	gene_id "RI:1:162850277:162850382-162851635:162851754:-"; transcript_id "RI:1:162850277:162850382-162851635:162851754:-:alternative2";
1	hq_isoforms.fasta.no5merge.collapsed.gff	exon	162851635	162851754	.	-	.	gene_id "RI:1:162850277:162850382-162851635:162851754:-"; transcript_id "RI:1:162850277:162850382-162851635:162851754:-:alternative2";
1	hq_isoforms.fasta.no5merge.collapsed.gff	exon	162850277	162851754	.	-	.	gene_id "RI:1:162850277:162850382-162851635:162851754:-"; transcript_id "RI:1:162850277:162850382-162851635:162851754:-:alternative1";
1	hq_isoforms.fasta.no5merge.collapsed.gff	exon	162862835	162862959	.	-	.	gene_id "RI:1:162862835:162862959-162865445:162865555:-"; transcript_id "RI:1:162862835:162862959-162865445:162865555:-:alternative2";
1	hq_isoforms.fasta.no5merge.collapsed.gff	exon	162865445	162865555	.	-	.	gene_id "RI:1:162862835:162862959-162865445:162865555:-"; transcript_id "RI:1:162862835:162862959-162865445:162865555:-:alternative2";
1	hq_isoforms.fasta.no5merge.collapsed.gff	exon	162862835	162865555	.	-	.	gene_id "RI:1:162862835:162862959-162865445:162865555:-"; transcript_id "RI:1:162862835:162862959-162865445:162865555:-:alternative1";
1	hq_isoforms.fasta.no5merge.collapsed.gff	exon	162862835	162862957	.	-	.	gene_id "RI:1:162862835:162862957-162865445:162865555:-"; transcript_id "RI:1:162862835:162862957-162865445:162865555:-:alternative2";
1	hq_isoforms.fasta.no5merge.collapsed.gff	exon	162865445	162865555	.	-	.	gene_id "RI:1:162862835:162862957-162865445:162865555:-"; transcript_id "RI:1:162862835:162862957-162865445:162865555:-:alternative2";
1	hq_isoforms.fasta.no5merge.collapsed.gff	exon	162862835	162865555	.	-	.	gene_id "RI:1:162862835:162862957-162865445:162865555:-"; transcript_id "RI:1:162862835:162862957-162865445:162865555:-:alternative1";
1	hq_isoforms.fasta.no5merge.collapsed.gff	exon	163328104	163328164	.	-	.	gene_id "RI:1:163328104:163328164-163331362:163331520:-"; transcript_id "RI:1:163328104:163328164-163331362:163331520:-:alternative2";
1	hq_isoforms.fasta.no5merge.collapsed.gff	exon	163331362	163331520	.	-	.	gene_id "RI:1:163328104:163328164-163331362:163331520:-"; transcript_id "RI:1:163328104:163328164-163331362:163331520:-:alternative2";
1	hq_isoforms.fasta.no5merge.collapsed.gff	exon	163328104	163331520	.	-	.	gene_id "RI:1:163328104:163328164-163331362:163331520:-"; transcript_id "RI:1:163328104:163328164-163331362:163331520:-:alternative1";
1	hq_isoforms.fasta.no5merge.collapsed.gff	exon	172768893	172769562	.	-	.	gene_id "RI:1:172768893:172769562-172769667:172769790:-"; transcript_id "RI:1:172768893:172769562-172769667:172769790:-:alternative2";
1	hq_isoforms.fasta.no5merge.collapsed.gff	exon	172769667	172769790	.	-	.	gene_id "RI:1:172768893:172769562-172769667:172769790:-"; transcript_id "RI:1:172768893:172769562-172769667:172769790:-:alternative2";
1	hq_isoforms.fasta.no5merge.collapsed.gff	exon	172768893	172769790	.	-	.	gene_id "RI:1:172768893:172769562-172769667:172769790:-"; transcript_id "RI:1:172768893:172769562-172769667:172769790:-:alternative1";
1	hq_isoforms.fasta.no5merge.collapsed.gff	exon	173105308	173105432	.	-	.	gene_id "RI:1:173105308:173105432-173106544:173106744:-"; transcript_id "RI:1:173105308:173105432-173106544:173106744:-:alternative2";
1	hq_isoforms.fasta.no5merge.collapsed.gff	exon	173106544	173106744	.	-	.	gene_id "RI:1:173105308:173105432-173106544:173106744:-"; transcript_id "RI:1:173105308:173105432-173106544:173106744:-:alternative2";
1	hq_isoforms.fasta.no5merge.collapsed.gff	exon	173105308	173106744	.	-	.	gene_id "RI:1:173105308:173105432-173106544:173106744:-"; transcript_id "RI:1:173105308:173105432-173106544:173106744:-:alternative1";
1	hq_isoforms.fasta.no5merge.collapsed.gff	exon	174744999	174745103	.	-	.	gene_id "RI:1:174744999:174745103-174746152:174746270:-"; transcript_id "RI:1:174744999:174745103-174746152:174746270:-:alternative2";
1	hq_isoforms.fasta.no5merge.collapsed.gff	exon	174746152	174746270	.	-	.	gene_id "RI:1:174744999:174745103-174746152:174746270:-"; transcript_id "RI:1:174744999:174745103-174746152:174746270:-:alternative2";
1	hq_isoforms.fasta.no5merge.collapsed.gff	exon	174744999	174746270	.	-	.	gene_id "RI:1:174744999:174745103-174746152:174746270:-"; transcript_id "RI:1:174744999:174745103-174746152:174746270:-:alternative1";
1	hq_isoforms.fasta.no5merge.collapsed.gff	exon	174744690	174746270	.	-	.	gene_id "RI:1:174744690:174746270-174746757:174746820:-"; transcript_id "RI:1:174744690:174746270-174746757:174746820:-:alternative2";
1	hq_isoforms.fasta.no5merge.collapsed.gff	exon	174746757	174746820	.	-	.	gene_id "RI:1:174744690:174746270-174746757:174746820:-"; transcript_id "RI:1:174744690:174746270-174746757:174746820:-:alternative2";
1	hq_isoforms.fasta.no5merge.collapsed.gff	exon	174744690	174746820	.	-	.	gene_id "RI:1:174744690:174746270-174746757:174746820:-"; transcript_id "RI:1:174744690:174746270-174746757:174746820:-:alternative1";
1	hq_isoforms.fasta.no5merge.collapsed.gff	exon	174927147	174927333	.	-	.	gene_id "RI:1:174927147:174927333-174928487:174928502:-"; transcript_id "RI:1:174927147:174927333-174928487:174928502:-:alternative2";
1	hq_isoforms.fasta.no5merge.collapsed.gff	exon	174928487	174928502	.	-	.	gene_id "RI:1:174927147:174927333-174928487:174928502:-"; transcript_id "RI:1:174927147:174927333-174928487:174928502:-:alternative2";
1	hq_isoforms.fasta.no5merge.collapsed.gff	exon	174927147	174928502	.	-	.	gene_id "RI:1:174927147:174927333-174928487:174928502:-"; transcript_id "RI:1:174927147:174927333-174928487:174928502:-:alternative1";
1	hq_isoforms.fasta.no5merge.collapsed.gff	exon	174943239	174943320	.	-	.	gene_id "RI:1:174943239:174943320-174944032:174944296:-"; transcript_id "RI:1:174943239:174943320-174944032:174944296:-:alternative2";
1	hq_isoforms.fasta.no5merge.collapsed.gff	exon	174944032	174944296	.	-	.	gene_id "RI:1:174943239:174943320-174944032:174944296:-"; transcript_id "RI:1:174943239:174943320-174944032:174944296:-:alternative2";
1	hq_isoforms.fasta.no5merge.collapsed.gff	exon	174943239	174944296	.	-	.	gene_id "RI:1:174943239:174943320-174944032:174944296:-"; transcript_id "RI:1:174943239:174943320-174944032:174944296:-:alternative1";
1	hq_isoforms.fasta.no5merge.collapsed.gff	exon	174943239	174943320	.	-	.	gene_id "RI:1:174943239:174943320-174944186:174944296:-"; transcript_id "RI:1:174943239:174943320-174944186:174944296:-:alternative2";
1	hq_isoforms.fasta.no5merge.collapsed.gff	exon	174944186	174944296	.	-	.	gene_id "RI:1:174943239:174943320-174944186:174944296:-"; transcript_id "RI:1:174943239:174943320-174944186:174944296:-:alternative2";
1	hq_isoforms.fasta.no5merge.collapsed.gff	exon	174943239	174944296	.	-	.	gene_id "RI:1:174943239:174943320-174944186:174944296:-"; transcript_id "RI:1:174943239:174943320-174944186:174944296:-:alternative1";
1	hq_isoforms.fasta.no5merge.collapsed.gff	exon	174962929	174963037	.	-	.	gene_id "RI:1:174962929:174963037-174963994:174964103:-"; transcript_id "RI:1:174962929:174963037-174963994:174964103:-:alternative2";
1	hq_isoforms.fasta.no5merge.collapsed.gff	exon	174963994	174964103	.	-	.	gene_id "RI:1:174962929:174963037-174963994:174964103:-"; transcript_id "RI:1:174962929:174963037-174963994:174964103:-:alternative2";
1	hq_isoforms.fasta.no5merge.collapsed.gff	exon	174962929	174964103	.	-	.	gene_id "RI:1:174962929:174963037-174963994:174964103:-"; transcript_id "RI:1:174962929:174963037-174963994:174964103:-:alternative1";
1	hq_isoforms.fasta.no5merge.collapsed.gff	exon	174945094	174945184	.	-	.	gene_id "RI:1:174945094:174945184-174945978:174947775:-"; transcript_id "RI:1:174945094:174945184-174945978:174947775:-:alternative2";
1	hq_isoforms.fasta.no5merge.collapsed.gff	exon	174945978	174947775	.	-	.	gene_id "RI:1:174945094:174945184-174945978:174947775:-"; transcript_id "RI:1:174945094:174945184-174945978:174947775:-:alternative2";
1	hq_isoforms.fasta.no5merge.collapsed.gff	exon	174945094	174947775	.	-	.	gene_id "RI:1:174945094:174945184-174945978:174947775:-"; transcript_id "RI:1:174945094:174945184-174945978:174947775:-:alternative1";
1	hq_isoforms.fasta.no5merge.collapsed.gff	exon	174962929	174963037	.	-	.	gene_id "RI:1:174962929:174963037-174963227:174964104:-"; transcript_id "RI:1:174962929:174963037-174963227:174964104:-:alternative2";
1	hq_isoforms.fasta.no5merge.collapsed.gff	exon	174963227	174964104	.	-	.	gene_id "RI:1:174962929:174963037-174963227:174964104:-"; transcript_id "RI:1:174962929:174963037-174963227:174964104:-:alternative2";
1	hq_isoforms.fasta.no5merge.collapsed.gff	exon	174962929	174964104	.	-	.	gene_id "RI:1:174962929:174963037-174963227:174964104:-"; transcript_id "RI:1:174962929:174963037-174963227:174964104:-:alternative1";
1	hq_isoforms.fasta.no5merge.collapsed.gff	exon	174962929	174963037	.	-	.	gene_id "RI:1:174962929:174963037-174963963:174964104:-"; transcript_id "RI:1:174962929:174963037-174963963:174964104:-:alternative2";
1	hq_isoforms.fasta.no5merge.collapsed.gff	exon	174963963	174964104	.	-	.	gene_id "RI:1:174962929:174963037-174963963:174964104:-"; transcript_id "RI:1:174962929:174963037-174963963:174964104:-:alternative2";
1	hq_isoforms.fasta.no5merge.collapsed.gff	exon	174962929	174964104	.	-	.	gene_id "RI:1:174962929:174963037-174963963:174964104:-"; transcript_id "RI:1:174962929:174963037-174963963:174964104:-:alternative1";
1	hq_isoforms.fasta.no5merge.collapsed.gff	exon	174945978	174946069	.	-	.	gene_id "RI:1:174945978:174946069-174947708:174947775:-"; transcript_id "RI:1:174945978:174946069-174947708:174947775:-:alternative2";
1	hq_isoforms.fasta.no5merge.collapsed.gff	exon	174947708	174947775	.	-	.	gene_id "RI:1:174945978:174946069-174947708:174947775:-"; transcript_id "RI:1:174945978:174946069-174947708:174947775:-:alternative2";
1	hq_isoforms.fasta.no5merge.collapsed.gff	exon	174945978	174947775	.	-	.	gene_id "RI:1:174945978:174946069-174947708:174947775:-"; transcript_id "RI:1:174945978:174946069-174947708:174947775:-:alternative1";
1	hq_isoforms.fasta.no5merge.collapsed.gff	exon	175595292	175596846	.	-	.	gene_id "RI:1:175595292:175596846-175597623:175597791:-"; transcript_id "RI:1:175595292:175596846-175597623:175597791:-:alternative2";
1	hq_isoforms.fasta.no5merge.collapsed.gff	exon	175597623	175597791	.	-	.	gene_id "RI:1:175595292:175596846-175597623:175597791:-"; transcript_id "RI:1:175595292:175596846-175597623:175597791:-:alternative2";
1	hq_isoforms.fasta.no5merge.collapsed.gff	exon	175595292	175597791	.	-	.	gene_id "RI:1:175595292:175596846-175597623:175597791:-"; transcript_id "RI:1:175595292:175596846-175597623:175597791:-:alternative1";
1	hq_isoforms.fasta.no5merge.collapsed.gff	exon	175930591	175930660	.	-	.	gene_id "RI:1:175930591:175930660-175932823:175932969:-"; transcript_id "RI:1:175930591:175930660-175932823:175932969:-:alternative2";
1	hq_isoforms.fasta.no5merge.collapsed.gff	exon	175932823	175932969	.	-	.	gene_id "RI:1:175930591:175930660-175932823:175932969:-"; transcript_id "RI:1:175930591:175930660-175932823:175932969:-:alternative2";
1	hq_isoforms.fasta.no5merge.collapsed.gff	exon	175930591	175932969	.	-	.	gene_id "RI:1:175930591:175930660-175932823:175932969:-"; transcript_id "RI:1:175930591:175930660-175932823:175932969:-:alternative1";
1	hq_isoforms.fasta.no5merge.collapsed.gff	exon	177646423	177646536	.	-	.	gene_id "RI:1:177646423:177646536-177647266:177647425:-"; transcript_id "RI:1:177646423:177646536-177647266:177647425:-:alternative2";
1	hq_isoforms.fasta.no5merge.collapsed.gff	exon	177647266	177647425	.	-	.	gene_id "RI:1:177646423:177646536-177647266:177647425:-"; transcript_id "RI:1:177646423:177646536-177647266:177647425:-:alternative2";
1	hq_isoforms.fasta.no5merge.collapsed.gff	exon	177646423	177647425	.	-	.	gene_id "RI:1:177646423:177646536-177647266:177647425:-"; transcript_id "RI:1:177646423:177646536-177647266:177647425:-:alternative1";
1	hq_isoforms.fasta.no5merge.collapsed.gff	exon	177644715	177644883	.	-	.	gene_id "RI:1:177644715:177644883-177645238:177645376:-"; transcript_id "RI:1:177644715:177644883-177645238:177645376:-:alternative2";
1	hq_isoforms.fasta.no5merge.collapsed.gff	exon	177645238	177645376	.	-	.	gene_id "RI:1:177644715:177644883-177645238:177645376:-"; transcript_id "RI:1:177644715:177644883-177645238:177645376:-:alternative2";
1	hq_isoforms.fasta.no5merge.collapsed.gff	exon	177644715	177645376	.	-	.	gene_id "RI:1:177644715:177644883-177645238:177645376:-"; transcript_id "RI:1:177644715:177644883-177645238:177645376:-:alternative1";
1	hq_isoforms.fasta.no5merge.collapsed.gff	exon	177644715	177644856	.	-	.	gene_id "RI:1:177644715:177644856-177645238:177645376:-"; transcript_id "RI:1:177644715:177644856-177645238:177645376:-:alternative2";
1	hq_isoforms.fasta.no5merge.collapsed.gff	exon	177645238	177645376	.	-	.	gene_id "RI:1:177644715:177644856-177645238:177645376:-"; transcript_id "RI:1:177644715:177644856-177645238:177645376:-:alternative2";
1	hq_isoforms.fasta.no5merge.collapsed.gff	exon	177644715	177645376	.	-	.	gene_id "RI:1:177644715:177644856-177645238:177645376:-"; transcript_id "RI:1:177644715:177644856-177645238:177645376:-:alternative1";
1	hq_isoforms.fasta.no5merge.collapsed.gff	exon	178783828	178783955	.	-	.	gene_id "RI:1:178783828:178783955-178785732:178785821:-"; transcript_id "RI:1:178783828:178783955-178785732:178785821:-:alternative2";
1	hq_isoforms.fasta.no5merge.collapsed.gff	exon	178785732	178785821	.	-	.	gene_id "RI:1:178783828:178783955-178785732:178785821:-"; transcript_id "RI:1:178783828:178783955-178785732:178785821:-:alternative2";
1	hq_isoforms.fasta.no5merge.collapsed.gff	exon	178783828	178785821	.	-	.	gene_id "RI:1:178783828:178783955-178785732:178785821:-"; transcript_id "RI:1:178783828:178783955-178785732:178785821:-:alternative1";
1	hq_isoforms.fasta.no5merge.collapsed.gff	exon	178832407	178832539	.	-	.	gene_id "RI:1:178832407:178832539-178835481:178835606:-"; transcript_id "RI:1:178832407:178832539-178835481:178835606:-:alternative2";
1	hq_isoforms.fasta.no5merge.collapsed.gff	exon	178835481	178835606	.	-	.	gene_id "RI:1:178832407:178832539-178835481:178835606:-"; transcript_id "RI:1:178832407:178832539-178835481:178835606:-:alternative2";
1	hq_isoforms.fasta.no5merge.collapsed.gff	exon	178832407	178835606	.	-	.	gene_id "RI:1:178832407:178832539-178835481:178835606:-"; transcript_id "RI:1:178832407:178832539-178835481:178835606:-:alternative1";
1	hq_isoforms.fasta.no5merge.collapsed.gff	exon	179336192	179336232	.	-	.	gene_id "RI:1:179336192:179336232-179336386:179336515:-"; transcript_id "RI:1:179336192:179336232-179336386:179336515:-:alternative2";
1	hq_isoforms.fasta.no5merge.collapsed.gff	exon	179336386	179336515	.	-	.	gene_id "RI:1:179336192:179336232-179336386:179336515:-"; transcript_id "RI:1:179336192:179336232-179336386:179336515:-:alternative2";
1	hq_isoforms.fasta.no5merge.collapsed.gff	exon	179336192	179336515	.	-	.	gene_id "RI:1:179336192:179336232-179336386:179336515:-"; transcript_id "RI:1:179336192:179336232-179336386:179336515:-:alternative1";
1	hq_isoforms.fasta.no5merge.collapsed.gff	exon	179336192	179336232	.	-	.	gene_id "RI:1:179336192:179336232-179336362:179336515:-"; transcript_id "RI:1:179336192:179336232-179336362:179336515:-:alternative2";
1	hq_isoforms.fasta.no5merge.collapsed.gff	exon	179336362	179336515	.	-	.	gene_id "RI:1:179336192:179336232-179336362:179336515:-"; transcript_id "RI:1:179336192:179336232-179336362:179336515:-:alternative2";
1	hq_isoforms.fasta.no5merge.collapsed.gff	exon	179336192	179336515	.	-	.	gene_id "RI:1:179336192:179336232-179336362:179336515:-"; transcript_id "RI:1:179336192:179336232-179336362:179336515:-:alternative1";
1	hq_isoforms.fasta.no5merge.collapsed.gff	exon	179336192	179336234	.	-	.	gene_id "RI:1:179336192:179336234-179336359:179336515:-"; transcript_id "RI:1:179336192:179336234-179336359:179336515:-:alternative2";
1	hq_isoforms.fasta.no5merge.collapsed.gff	exon	179336359	179336515	.	-	.	gene_id "RI:1:179336192:179336234-179336359:179336515:-"; transcript_id "RI:1:179336192:179336234-179336359:179336515:-:alternative2";
1	hq_isoforms.fasta.no5merge.collapsed.gff	exon	179336192	179336515	.	-	.	gene_id "RI:1:179336192:179336234-179336359:179336515:-"; transcript_id "RI:1:179336192:179336234-179336359:179336515:-:alternative1";
1	hq_isoforms.fasta.no5merge.collapsed.gff	exon	179344496	179346507	.	-	.	gene_id "RI:1:179344496:179346507-179347481:179347733:-"; transcript_id "RI:1:179344496:179346507-179347481:179347733:-:alternative2";
1	hq_isoforms.fasta.no5merge.collapsed.gff	exon	179347481	179347733	.	-	.	gene_id "RI:1:179344496:179346507-179347481:179347733:-"; transcript_id "RI:1:179344496:179346507-179347481:179347733:-:alternative2";
1	hq_isoforms.fasta.no5merge.collapsed.gff	exon	179344496	179347733	.	-	.	gene_id "RI:1:179344496:179346507-179347481:179347733:-"; transcript_id "RI:1:179344496:179346507-179347481:179347733:-:alternative1";
1	hq_isoforms.fasta.no5merge.collapsed.gff	exon	179344496	179347016	.	-	.	gene_id "RI:1:179344496:179347016-179347481:179347733:-"; transcript_id "RI:1:179344496:179347016-179347481:179347733:-:alternative2";
1	hq_isoforms.fasta.no5merge.collapsed.gff	exon	179347481	179347733	.	-	.	gene_id "RI:1:179344496:179347016-179347481:179347733:-"; transcript_id "RI:1:179344496:179347016-179347481:179347733:-:alternative2";
1	hq_isoforms.fasta.no5merge.collapsed.gff	exon	179344496	179347733	.	-	.	gene_id "RI:1:179344496:179347016-179347481:179347733:-"; transcript_id "RI:1:179344496:179347016-179347481:179347733:-:alternative1";
1	hq_isoforms.fasta.no5merge.collapsed.gff	exon	179344496	179345212	.	-	.	gene_id "RI:1:179344496:179345212-179347481:179347733:-"; transcript_id "RI:1:179344496:179345212-179347481:179347733:-:alternative2";
1	hq_isoforms.fasta.no5merge.collapsed.gff	exon	179347481	179347733	.	-	.	gene_id "RI:1:179344496:179345212-179347481:179347733:-"; transcript_id "RI:1:179344496:179345212-179347481:179347733:-:alternative2";
1	hq_isoforms.fasta.no5merge.collapsed.gff	exon	179344496	179347733	.	-	.	gene_id "RI:1:179344496:179345212-179347481:179347733:-"; transcript_id "RI:1:179344496:179345212-179347481:179347733:-:alternative1";
1	hq_isoforms.fasta.no5merge.collapsed.gff	exon	179344496	179347364	.	-	.	gene_id "RI:1:179344496:179347364-179347417:179347733:-"; transcript_id "RI:1:179344496:179347364-179347417:179347733:-:alternative2";
1	hq_isoforms.fasta.no5merge.collapsed.gff	exon	179347417	179347733	.	-	.	gene_id "RI:1:179344496:179347364-179347417:179347733:-"; transcript_id "RI:1:179344496:179347364-179347417:179347733:-:alternative2";
1	hq_isoforms.fasta.no5merge.collapsed.gff	exon	179344496	179347733	.	-	.	gene_id "RI:1:179344496:179347364-179347417:179347733:-"; transcript_id "RI:1:179344496:179347364-179347417:179347733:-:alternative1";
1	hq_isoforms.fasta.no5merge.collapsed.gff	exon	179323402	179323427	.	-	.	gene_id "RI:1:179323402:179323427-179326396:179326456:-"; transcript_id "RI:1:179323402:179323427-179326396:179326456:-:alternative2";
1	hq_isoforms.fasta.no5merge.collapsed.gff	exon	179326396	179326456	.	-	.	gene_id "RI:1:179323402:179323427-179326396:179326456:-"; transcript_id "RI:1:179323402:179323427-179326396:179326456:-:alternative2";
1	hq_isoforms.fasta.no5merge.collapsed.gff	exon	179323402	179326456	.	-	.	gene_id "RI:1:179323402:179323427-179326396:179326456:-"; transcript_id "RI:1:179323402:179323427-179326396:179326456:-:alternative1";
1	hq_isoforms.fasta.no5merge.collapsed.gff	exon	179323006	179323110	.	-	.	gene_id "RI:1:179323006:179323110-179323402:179326456:-"; transcript_id "RI:1:179323006:179323110-179323402:179326456:-:alternative2";
1	hq_isoforms.fasta.no5merge.collapsed.gff	exon	179323402	179326456	.	-	.	gene_id "RI:1:179323006:179323110-179323402:179326456:-"; transcript_id "RI:1:179323006:179323110-179323402:179326456:-:alternative2";
1	hq_isoforms.fasta.no5merge.collapsed.gff	exon	179323006	179326456	.	-	.	gene_id "RI:1:179323006:179323110-179323402:179326456:-"; transcript_id "RI:1:179323006:179323110-179323402:179326456:-:alternative1";
1	hq_isoforms.fasta.no5merge.collapsed.gff	exon	179340222	179340474	.	-	.	gene_id "RI:1:179340222:179340474-179342402:179342421:-"; transcript_id "RI:1:179340222:179340474-179342402:179342421:-:alternative2";
1	hq_isoforms.fasta.no5merge.collapsed.gff	exon	179342402	179342421	.	-	.	gene_id "RI:1:179340222:179340474-179342402:179342421:-"; transcript_id "RI:1:179340222:179340474-179342402:179342421:-:alternative2";
1	hq_isoforms.fasta.no5merge.collapsed.gff	exon	179340222	179342421	.	-	.	gene_id "RI:1:179340222:179340474-179342402:179342421:-"; transcript_id "RI:1:179340222:179340474-179342402:179342421:-:alternative1";
1	hq_isoforms.fasta.no5merge.collapsed.gff	exon	179340222	179340222	.	-	.	gene_id "RI:1:179340222:179340222-179342402:179342421:-"; transcript_id "RI:1:179340222:179340222-179342402:179342421:-:alternative2";
1	hq_isoforms.fasta.no5merge.collapsed.gff	exon	179342402	179342421	.	-	.	gene_id "RI:1:179340222:179340222-179342402:179342421:-"; transcript_id "RI:1:179340222:179340222-179342402:179342421:-:alternative2";
1	hq_isoforms.fasta.no5merge.collapsed.gff	exon	179340222	179342421	.	-	.	gene_id "RI:1:179340222:179340222-179342402:179342421:-"; transcript_id "RI:1:179340222:179340222-179342402:179342421:-:alternative1";
1	hq_isoforms.fasta.no5merge.collapsed.gff	exon	179343025	179343054	.	-	.	gene_id "RI:1:179343025:179343054-179344496:179347016:-"; transcript_id "RI:1:179343025:179343054-179344496:179347016:-:alternative2";
1	hq_isoforms.fasta.no5merge.collapsed.gff	exon	179344496	179347016	.	-	.	gene_id "RI:1:179343025:179343054-179344496:179347016:-"; transcript_id "RI:1:179343025:179343054-179344496:179347016:-:alternative2";
1	hq_isoforms.fasta.no5merge.collapsed.gff	exon	179343025	179347016	.	-	.	gene_id "RI:1:179343025:179343054-179344496:179347016:-"; transcript_id "RI:1:179343025:179343054-179344496:179347016:-:alternative1";
1	hq_isoforms.fasta.no5merge.collapsed.gff	exon	179346717	179347016	.	-	.	gene_id "RI:1:179346717:179347016-179347481:179347733:-"; transcript_id "RI:1:179346717:179347016-179347481:179347733:-:alternative2";
1	hq_isoforms.fasta.no5merge.collapsed.gff	exon	179347481	179347733	.	-	.	gene_id "RI:1:179346717:179347016-179347481:179347733:-"; transcript_id "RI:1:179346717:179347016-179347481:179347733:-:alternative2";
1	hq_isoforms.fasta.no5merge.collapsed.gff	exon	179346717	179347733	.	-	.	gene_id "RI:1:179346717:179347016-179347481:179347733:-"; transcript_id "RI:1:179346717:179347016-179347481:179347733:-:alternative1";
1	hq_isoforms.fasta.no5merge.collapsed.gff	exon	179344496	179345212	.	-	.	gene_id "RI:1:179344496:179345212-179345650:179345847:-"; transcript_id "RI:1:179344496:179345212-179345650:179345847:-:alternative2";
1	hq_isoforms.fasta.no5merge.collapsed.gff	exon	179345650	179345847	.	-	.	gene_id "RI:1:179344496:179345212-179345650:179345847:-"; transcript_id "RI:1:179344496:179345212-179345650:179345847:-:alternative2";
1	hq_isoforms.fasta.no5merge.collapsed.gff	exon	179344496	179345847	.	-	.	gene_id "RI:1:179344496:179345212-179345650:179345847:-"; transcript_id "RI:1:179344496:179345212-179345650:179345847:-:alternative1";
1	hq_isoforms.fasta.no5merge.collapsed.gff	exon	179343025	179343054	.	-	.	gene_id "RI:1:179343025:179343054-179344496:179347733:-"; transcript_id "RI:1:179343025:179343054-179344496:179347733:-:alternative2";
1	hq_isoforms.fasta.no5merge.collapsed.gff	exon	179344496	179347733	.	-	.	gene_id "RI:1:179343025:179343054-179344496:179347733:-"; transcript_id "RI:1:179343025:179343054-179344496:179347733:-:alternative2";
1	hq_isoforms.fasta.no5merge.collapsed.gff	exon	179343025	179347733	.	-	.	gene_id "RI:1:179343025:179343054-179344496:179347733:-"; transcript_id "RI:1:179343025:179343054-179344496:179347733:-:alternative1";
1	hq_isoforms.fasta.no5merge.collapsed.gff	exon	179343025	179347016	.	-	.	gene_id "RI:1:179343025:179347016-179347481:179347733:-"; transcript_id "RI:1:179343025:179347016-179347481:179347733:-:alternative2";
1	hq_isoforms.fasta.no5merge.collapsed.gff	exon	179347481	179347733	.	-	.	gene_id "RI:1:179343025:179347016-179347481:179347733:-"; transcript_id "RI:1:179343025:179347016-179347481:179347733:-:alternative2";
1	hq_isoforms.fasta.no5merge.collapsed.gff	exon	179343025	179347733	.	-	.	gene_id "RI:1:179343025:179347016-179347481:179347733:-"; transcript_id "RI:1:179343025:179347016-179347481:179347733:-:alternative1";
1	hq_isoforms.fasta.no5merge.collapsed.gff	exon	179343025	179343054	.	-	.	gene_id "RI:1:179343025:179343054-179347481:179347733:-"; transcript_id "RI:1:179343025:179343054-179347481:179347733:-:alternative2";
1	hq_isoforms.fasta.no5merge.collapsed.gff	exon	179347481	179347733	.	-	.	gene_id "RI:1:179343025:179343054-179347481:179347733:-"; transcript_id "RI:1:179343025:179343054-179347481:179347733:-:alternative2";
1	hq_isoforms.fasta.no5merge.collapsed.gff	exon	179343025	179347733	.	-	.	gene_id "RI:1:179343025:179343054-179347481:179347733:-"; transcript_id "RI:1:179343025:179343054-179347481:179347733:-:alternative1";
1	hq_isoforms.fasta.no5merge.collapsed.gff	exon	182599965	182600062	.	-	.	gene_id "RI:1:182599965:182600062-182602144:182604538:-"; transcript_id "RI:1:182599965:182600062-182602144:182604538:-:alternative2";
1	hq_isoforms.fasta.no5merge.collapsed.gff	exon	182602144	182604538	.	-	.	gene_id "RI:1:182599965:182600062-182602144:182604538:-"; transcript_id "RI:1:182599965:182600062-182602144:182604538:-:alternative2";
1	hq_isoforms.fasta.no5merge.collapsed.gff	exon	182599965	182604538	.	-	.	gene_id "RI:1:182599965:182600062-182602144:182604538:-"; transcript_id "RI:1:182599965:182600062-182602144:182604538:-:alternative1";
1	hq_isoforms.fasta.no5merge.collapsed.gff	exon	183010894	183014658	.	-	.	gene_id "RI:1:183010894:183014658-183014689:183015550:-"; transcript_id "RI:1:183010894:183014658-183014689:183015550:-:alternative2";
1	hq_isoforms.fasta.no5merge.collapsed.gff	exon	183014689	183015550	.	-	.	gene_id "RI:1:183010894:183014658-183014689:183015550:-"; transcript_id "RI:1:183010894:183014658-183014689:183015550:-:alternative2";
1	hq_isoforms.fasta.no5merge.collapsed.gff	exon	183010894	183015550	.	-	.	gene_id "RI:1:183010894:183014658-183014689:183015550:-"; transcript_id "RI:1:183010894:183014658-183014689:183015550:-:alternative1";
1	hq_isoforms.fasta.no5merge.collapsed.gff	exon	183028277	183028380	.	-	.	gene_id "RI:1:183028277:183028380-183030367:183030486:-"; transcript_id "RI:1:183028277:183028380-183030367:183030486:-:alternative2";
1	hq_isoforms.fasta.no5merge.collapsed.gff	exon	183030367	183030486	.	-	.	gene_id "RI:1:183028277:183028380-183030367:183030486:-"; transcript_id "RI:1:183028277:183028380-183030367:183030486:-:alternative2";
1	hq_isoforms.fasta.no5merge.collapsed.gff	exon	183028277	183030486	.	-	.	gene_id "RI:1:183028277:183028380-183030367:183030486:-"; transcript_id "RI:1:183028277:183028380-183030367:183030486:-:alternative1";
1	hq_isoforms.fasta.no5merge.collapsed.gff	exon	183102113	183102252	.	-	.	gene_id "RI:1:183102113:183102252-183102543:183102651:-"; transcript_id "RI:1:183102113:183102252-183102543:183102651:-:alternative2";
1	hq_isoforms.fasta.no5merge.collapsed.gff	exon	183102543	183102651	.	-	.	gene_id "RI:1:183102113:183102252-183102543:183102651:-"; transcript_id "RI:1:183102113:183102252-183102543:183102651:-:alternative2";
1	hq_isoforms.fasta.no5merge.collapsed.gff	exon	183102113	183102651	.	-	.	gene_id "RI:1:183102113:183102252-183102543:183102651:-"; transcript_id "RI:1:183102113:183102252-183102543:183102651:-:alternative1";
1	hq_isoforms.fasta.no5merge.collapsed.gff	exon	183102543	183102651	.	-	.	gene_id "RI:1:183102543:183102651-183104876:183105038:-"; transcript_id "RI:1:183102543:183102651-183104876:183105038:-:alternative2";
1	hq_isoforms.fasta.no5merge.collapsed.gff	exon	183104876	183105038	.	-	.	gene_id "RI:1:183102543:183102651-183104876:183105038:-"; transcript_id "RI:1:183102543:183102651-183104876:183105038:-:alternative2";
1	hq_isoforms.fasta.no5merge.collapsed.gff	exon	183102543	183105038	.	-	.	gene_id "RI:1:183102543:183102651-183104876:183105038:-"; transcript_id "RI:1:183102543:183102651-183104876:183105038:-:alternative1";
1	hq_isoforms.fasta.no5merge.collapsed.gff	exon	183538369	183538526	.	-	.	gene_id "RI:1:183538369:183538526-183542514:183542618:-"; transcript_id "RI:1:183538369:183538526-183542514:183542618:-:alternative2";
1	hq_isoforms.fasta.no5merge.collapsed.gff	exon	183542514	183542618	.	-	.	gene_id "RI:1:183538369:183538526-183542514:183542618:-"; transcript_id "RI:1:183538369:183538526-183542514:183542618:-:alternative2";
1	hq_isoforms.fasta.no5merge.collapsed.gff	exon	183538369	183542618	.	-	.	gene_id "RI:1:183538369:183538526-183542514:183542618:-"; transcript_id "RI:1:183538369:183538526-183542514:183542618:-:alternative1";
1	hq_isoforms.fasta.no5merge.collapsed.gff	exon	183582238	183582300	.	-	.	gene_id "RI:1:183582238:183582300-183583766:183583838:-"; transcript_id "RI:1:183582238:183582300-183583766:183583838:-:alternative2";
1	hq_isoforms.fasta.no5merge.collapsed.gff	exon	183583766	183583838	.	-	.	gene_id "RI:1:183582238:183582300-183583766:183583838:-"; transcript_id "RI:1:183582238:183582300-183583766:183583838:-:alternative2";
1	hq_isoforms.fasta.no5merge.collapsed.gff	exon	183582238	183583838	.	-	.	gene_id "RI:1:183582238:183582300-183583766:183583838:-"; transcript_id "RI:1:183582238:183582300-183583766:183583838:-:alternative1";
1	hq_isoforms.fasta.no5merge.collapsed.gff	exon	186026551	186029012	.	-	.	gene_id "RI:1:186026551:186029012-186029133:186029420:-"; transcript_id "RI:1:186026551:186029012-186029133:186029420:-:alternative2";
1	hq_isoforms.fasta.no5merge.collapsed.gff	exon	186029133	186029420	.	-	.	gene_id "RI:1:186026551:186029012-186029133:186029420:-"; transcript_id "RI:1:186026551:186029012-186029133:186029420:-:alternative2";
1	hq_isoforms.fasta.no5merge.collapsed.gff	exon	186026551	186029420	.	-	.	gene_id "RI:1:186026551:186029012-186029133:186029420:-"; transcript_id "RI:1:186026551:186029012-186029133:186029420:-:alternative1";
1	hq_isoforms.fasta.no5merge.collapsed.gff	exon	187148860	187149076	.	-	.	gene_id "RI:1:187148860:187149076-187149136:187149288:-"; transcript_id "RI:1:187148860:187149076-187149136:187149288:-:alternative2";
1	hq_isoforms.fasta.no5merge.collapsed.gff	exon	187149136	187149288	.	-	.	gene_id "RI:1:187148860:187149076-187149136:187149288:-"; transcript_id "RI:1:187148860:187149076-187149136:187149288:-:alternative2";
1	hq_isoforms.fasta.no5merge.collapsed.gff	exon	187148860	187149288	.	-	.	gene_id "RI:1:187148860:187149076-187149136:187149288:-"; transcript_id "RI:1:187148860:187149076-187149136:187149288:-:alternative1";
1	hq_isoforms.fasta.no5merge.collapsed.gff	exon	190739314	190739533	.	-	.	gene_id "RI:1:190739314:190739533-190741180:190742036:-"; transcript_id "RI:1:190739314:190739533-190741180:190742036:-:alternative2";
1	hq_isoforms.fasta.no5merge.collapsed.gff	exon	190741180	190742036	.	-	.	gene_id "RI:1:190739314:190739533-190741180:190742036:-"; transcript_id "RI:1:190739314:190739533-190741180:190742036:-:alternative2";
1	hq_isoforms.fasta.no5merge.collapsed.gff	exon	190739314	190742036	.	-	.	gene_id "RI:1:190739314:190739533-190741180:190742036:-"; transcript_id "RI:1:190739314:190739533-190741180:190742036:-:alternative1";
1	hq_isoforms.fasta.no5merge.collapsed.gff	exon	192926844	192926910	.	-	.	gene_id "RI:1:192926844:192926910-192927786:192927844:-"; transcript_id "RI:1:192926844:192926910-192927786:192927844:-:alternative2";
1	hq_isoforms.fasta.no5merge.collapsed.gff	exon	192927786	192927844	.	-	.	gene_id "RI:1:192926844:192926910-192927786:192927844:-"; transcript_id "RI:1:192926844:192926910-192927786:192927844:-:alternative2";
1	hq_isoforms.fasta.no5merge.collapsed.gff	exon	192926844	192927844	.	-	.	gene_id "RI:1:192926844:192926910-192927786:192927844:-"; transcript_id "RI:1:192926844:192926910-192927786:192927844:-:alternative1";
1	hq_isoforms.fasta.no5merge.collapsed.gff	exon	192910352	192910498	.	-	.	gene_id "RI:1:192910352:192910498-192912570:192912762:-"; transcript_id "RI:1:192910352:192910498-192912570:192912762:-:alternative2";
1	hq_isoforms.fasta.no5merge.collapsed.gff	exon	192912570	192912762	.	-	.	gene_id "RI:1:192910352:192910498-192912570:192912762:-"; transcript_id "RI:1:192910352:192910498-192912570:192912762:-:alternative2";
1	hq_isoforms.fasta.no5merge.collapsed.gff	exon	192910352	192912762	.	-	.	gene_id "RI:1:192910352:192910498-192912570:192912762:-"; transcript_id "RI:1:192910352:192910498-192912570:192912762:-:alternative1";
1	hq_isoforms.fasta.no5merge.collapsed.gff	exon	192933790	192933897	.	-	.	gene_id "RI:1:192933790:192933897-192935380:192935515:-"; transcript_id "RI:1:192933790:192933897-192935380:192935515:-:alternative2";
1	hq_isoforms.fasta.no5merge.collapsed.gff	exon	192935380	192935515	.	-	.	gene_id "RI:1:192933790:192933897-192935380:192935515:-"; transcript_id "RI:1:192933790:192933897-192935380:192935515:-:alternative2";
1	hq_isoforms.fasta.no5merge.collapsed.gff	exon	192933790	192935515	.	-	.	gene_id "RI:1:192933790:192933897-192935380:192935515:-"; transcript_id "RI:1:192933790:192933897-192935380:192935515:-:alternative1";
1	hq_isoforms.fasta.no5merge.collapsed.gff	exon	192925757	192925879	.	-	.	gene_id "RI:1:192925757:192925879-192926844:192927844:-"; transcript_id "RI:1:192925757:192925879-192926844:192927844:-:alternative2";
1	hq_isoforms.fasta.no5merge.collapsed.gff	exon	192926844	192927844	.	-	.	gene_id "RI:1:192925757:192925879-192926844:192927844:-"; transcript_id "RI:1:192925757:192925879-192926844:192927844:-:alternative2";
1	hq_isoforms.fasta.no5merge.collapsed.gff	exon	192925757	192927844	.	-	.	gene_id "RI:1:192925757:192925879-192926844:192927844:-"; transcript_id "RI:1:192925757:192925879-192926844:192927844:-:alternative1";
1	hq_isoforms.fasta.no5merge.collapsed.gff	exon	192925757	192926910	.	-	.	gene_id "RI:1:192925757:192926910-192927786:192927844:-"; transcript_id "RI:1:192925757:192926910-192927786:192927844:-:alternative2";
1	hq_isoforms.fasta.no5merge.collapsed.gff	exon	192927786	192927844	.	-	.	gene_id "RI:1:192925757:192926910-192927786:192927844:-"; transcript_id "RI:1:192925757:192926910-192927786:192927844:-:alternative2";
1	hq_isoforms.fasta.no5merge.collapsed.gff	exon	192925757	192927844	.	-	.	gene_id "RI:1:192925757:192926910-192927786:192927844:-"; transcript_id "RI:1:192925757:192926910-192927786:192927844:-:alternative1";
1	hq_isoforms.fasta.no5merge.collapsed.gff	exon	192925757	192925879	.	-	.	gene_id "RI:1:192925757:192925879-192926844:192926910:-"; transcript_id "RI:1:192925757:192925879-192926844:192926910:-:alternative2";
1	hq_isoforms.fasta.no5merge.collapsed.gff	exon	192926844	192926910	.	-	.	gene_id "RI:1:192925757:192925879-192926844:192926910:-"; transcript_id "RI:1:192925757:192925879-192926844:192926910:-:alternative2";
1	hq_isoforms.fasta.no5merge.collapsed.gff	exon	192925757	192926910	.	-	.	gene_id "RI:1:192925757:192925879-192926844:192926910:-"; transcript_id "RI:1:192925757:192925879-192926844:192926910:-:alternative1";
1	hq_isoforms.fasta.no5merge.collapsed.gff	exon	192953121	192953186	.	-	.	gene_id "RI:1:192953121:192953186-192954502:192954624:-"; transcript_id "RI:1:192953121:192953186-192954502:192954624:-:alternative2";
1	hq_isoforms.fasta.no5merge.collapsed.gff	exon	192954502	192954624	.	-	.	gene_id "RI:1:192953121:192953186-192954502:192954624:-"; transcript_id "RI:1:192953121:192953186-192954502:192954624:-:alternative2";
1	hq_isoforms.fasta.no5merge.collapsed.gff	exon	192953121	192954624	.	-	.	gene_id "RI:1:192953121:192953186-192954502:192954624:-"; transcript_id "RI:1:192953121:192953186-192954502:192954624:-:alternative1";
1	hq_isoforms.fasta.no5merge.collapsed.gff	exon	192943025	192943108	.	-	.	gene_id "RI:1:192943025:192943108-192944298:192944626:-"; transcript_id "RI:1:192943025:192943108-192944298:192944626:-:alternative2";
1	hq_isoforms.fasta.no5merge.collapsed.gff	exon	192944298	192944626	.	-	.	gene_id "RI:1:192943025:192943108-192944298:192944626:-"; transcript_id "RI:1:192943025:192943108-192944298:192944626:-:alternative2";
1	hq_isoforms.fasta.no5merge.collapsed.gff	exon	192943025	192944626	.	-	.	gene_id "RI:1:192943025:192943108-192944298:192944626:-"; transcript_id "RI:1:192943025:192943108-192944298:192944626:-:alternative1";
1	hq_isoforms.fasta.no5merge.collapsed.gff	exon	192943025	192943113	.	-	.	gene_id "RI:1:192943025:192943113-192944298:192944626:-"; transcript_id "RI:1:192943025:192943113-192944298:192944626:-:alternative2";
1	hq_isoforms.fasta.no5merge.collapsed.gff	exon	192944298	192944626	.	-	.	gene_id "RI:1:192943025:192943113-192944298:192944626:-"; transcript_id "RI:1:192943025:192943113-192944298:192944626:-:alternative2";
1	hq_isoforms.fasta.no5merge.collapsed.gff	exon	192943025	192944626	.	-	.	gene_id "RI:1:192943025:192943113-192944298:192944626:-"; transcript_id "RI:1:192943025:192943113-192944298:192944626:-:alternative1";
1	hq_isoforms.fasta.no5merge.collapsed.gff	exon	193432742	193432892	.	-	.	gene_id "RI:1:193432742:193432892-193436360:193436470:-"; transcript_id "RI:1:193432742:193432892-193436360:193436470:-:alternative2";
1	hq_isoforms.fasta.no5merge.collapsed.gff	exon	193436360	193436470	.	-	.	gene_id "RI:1:193432742:193432892-193436360:193436470:-"; transcript_id "RI:1:193432742:193432892-193436360:193436470:-:alternative2";
1	hq_isoforms.fasta.no5merge.collapsed.gff	exon	193432742	193436470	.	-	.	gene_id "RI:1:193432742:193432892-193436360:193436470:-"; transcript_id "RI:1:193432742:193432892-193436360:193436470:-:alternative1";
1	hq_isoforms.fasta.no5merge.collapsed.gff	exon	194290373	194291573	.	-	.	gene_id "RI:1:194290373:194291573-194292973:194293112:-"; transcript_id "RI:1:194290373:194291573-194292973:194293112:-:alternative2";
1	hq_isoforms.fasta.no5merge.collapsed.gff	exon	194292973	194293112	.	-	.	gene_id "RI:1:194290373:194291573-194292973:194293112:-"; transcript_id "RI:1:194290373:194291573-194292973:194293112:-:alternative2";
1	hq_isoforms.fasta.no5merge.collapsed.gff	exon	194290373	194293112	.	-	.	gene_id "RI:1:194290373:194291573-194292973:194293112:-"; transcript_id "RI:1:194290373:194291573-194292973:194293112:-:alternative1";
1	hq_isoforms.fasta.no5merge.collapsed.gff	exon	194377974	194378052	.	-	.	gene_id "RI:1:194377974:194378052-194379728:194380045:-"; transcript_id "RI:1:194377974:194378052-194379728:194380045:-:alternative2";
1	hq_isoforms.fasta.no5merge.collapsed.gff	exon	194379728	194380045	.	-	.	gene_id "RI:1:194377974:194378052-194379728:194380045:-"; transcript_id "RI:1:194377974:194378052-194379728:194380045:-:alternative2";
1	hq_isoforms.fasta.no5merge.collapsed.gff	exon	194377974	194380045	.	-	.	gene_id "RI:1:194377974:194378052-194379728:194380045:-"; transcript_id "RI:1:194377974:194378052-194379728:194380045:-:alternative1";
1	hq_isoforms.fasta.no5merge.collapsed.gff	exon	195780322	195780489	.	-	.	gene_id "RI:1:195780322:195780489-195781007:195781138:-"; transcript_id "RI:1:195780322:195780489-195781007:195781138:-:alternative2";
1	hq_isoforms.fasta.no5merge.collapsed.gff	exon	195781007	195781138	.	-	.	gene_id "RI:1:195780322:195780489-195781007:195781138:-"; transcript_id "RI:1:195780322:195780489-195781007:195781138:-:alternative2";
1	hq_isoforms.fasta.no5merge.collapsed.gff	exon	195780322	195781138	.	-	.	gene_id "RI:1:195780322:195780489-195781007:195781138:-"; transcript_id "RI:1:195780322:195780489-195781007:195781138:-:alternative1";
1	hq_isoforms.fasta.no5merge.collapsed.gff	exon	196094479	196094591	.	-	.	gene_id "RI:1:196094479:196094591-196096115:196096206:-"; transcript_id "RI:1:196094479:196094591-196096115:196096206:-:alternative2";
1	hq_isoforms.fasta.no5merge.collapsed.gff	exon	196096115	196096206	.	-	.	gene_id "RI:1:196094479:196094591-196096115:196096206:-"; transcript_id "RI:1:196094479:196094591-196096115:196096206:-:alternative2";
1	hq_isoforms.fasta.no5merge.collapsed.gff	exon	196094479	196096206	.	-	.	gene_id "RI:1:196094479:196094591-196096115:196096206:-"; transcript_id "RI:1:196094479:196094591-196096115:196096206:-:alternative1";
1	hq_isoforms.fasta.no5merge.collapsed.gff	exon	196474408	196474440	.	-	.	gene_id "RI:1:196474408:196474440-196474844:196474883:-"; transcript_id "RI:1:196474408:196474440-196474844:196474883:-:alternative2";
1	hq_isoforms.fasta.no5merge.collapsed.gff	exon	196474844	196474883	.	-	.	gene_id "RI:1:196474408:196474440-196474844:196474883:-"; transcript_id "RI:1:196474408:196474440-196474844:196474883:-:alternative2";
1	hq_isoforms.fasta.no5merge.collapsed.gff	exon	196474408	196474883	.	-	.	gene_id "RI:1:196474408:196474440-196474844:196474883:-"; transcript_id "RI:1:196474408:196474440-196474844:196474883:-:alternative1";
1	hq_isoforms.fasta.no5merge.collapsed.gff	exon	196481678	196481735	.	-	.	gene_id "RI:1:196481678:196481735-196482048:196482104:-"; transcript_id "RI:1:196481678:196481735-196482048:196482104:-:alternative2";
1	hq_isoforms.fasta.no5merge.collapsed.gff	exon	196482048	196482104	.	-	.	gene_id "RI:1:196481678:196481735-196482048:196482104:-"; transcript_id "RI:1:196481678:196481735-196482048:196482104:-:alternative2";
1	hq_isoforms.fasta.no5merge.collapsed.gff	exon	196481678	196482104	.	-	.	gene_id "RI:1:196481678:196481735-196482048:196482104:-"; transcript_id "RI:1:196481678:196481735-196482048:196482104:-:alternative1";
1	hq_isoforms.fasta.no5merge.collapsed.gff	exon	196825973	196826067	.	-	.	gene_id "RI:1:196825973:196826067-196827356:196827403:-"; transcript_id "RI:1:196825973:196826067-196827356:196827403:-:alternative2";
1	hq_isoforms.fasta.no5merge.collapsed.gff	exon	196827356	196827403	.	-	.	gene_id "RI:1:196825973:196826067-196827356:196827403:-"; transcript_id "RI:1:196825973:196826067-196827356:196827403:-:alternative2";
1	hq_isoforms.fasta.no5merge.collapsed.gff	exon	196825973	196827403	.	-	.	gene_id "RI:1:196825973:196826067-196827356:196827403:-"; transcript_id "RI:1:196825973:196826067-196827356:196827403:-:alternative1";
1	hq_isoforms.fasta.no5merge.collapsed.gff	exon	197785837	197786069	.	-	.	gene_id "RI:1:197785837:197786069-197786532:197787418:-"; transcript_id "RI:1:197785837:197786069-197786532:197787418:-:alternative2";
1	hq_isoforms.fasta.no5merge.collapsed.gff	exon	197786532	197787418	.	-	.	gene_id "RI:1:197785837:197786069-197786532:197787418:-"; transcript_id "RI:1:197785837:197786069-197786532:197787418:-:alternative2";
1	hq_isoforms.fasta.no5merge.collapsed.gff	exon	197785837	197787418	.	-	.	gene_id "RI:1:197785837:197786069-197786532:197787418:-"; transcript_id "RI:1:197785837:197786069-197786532:197787418:-:alternative1";
1	hq_isoforms.fasta.no5merge.collapsed.gff	exon	197786532	197786630	.	-	.	gene_id "RI:1:197786532:197786630-197786805:197787418:-"; transcript_id "RI:1:197786532:197786630-197786805:197787418:-:alternative2";
1	hq_isoforms.fasta.no5merge.collapsed.gff	exon	197786805	197787418	.	-	.	gene_id "RI:1:197786532:197786630-197786805:197787418:-"; transcript_id "RI:1:197786532:197786630-197786805:197787418:-:alternative2";
1	hq_isoforms.fasta.no5merge.collapsed.gff	exon	197786532	197787418	.	-	.	gene_id "RI:1:197786532:197786630-197786805:197787418:-"; transcript_id "RI:1:197786532:197786630-197786805:197787418:-:alternative1";
1	hq_isoforms.fasta.no5merge.collapsed.gff	exon	198675752	198676911	.	-	.	gene_id "RI:1:198675752:198676911-198677123:198679410:-"; transcript_id "RI:1:198675752:198676911-198677123:198679410:-:alternative2";
1	hq_isoforms.fasta.no5merge.collapsed.gff	exon	198677123	198679410	.	-	.	gene_id "RI:1:198675752:198676911-198677123:198679410:-"; transcript_id "RI:1:198675752:198676911-198677123:198679410:-:alternative2";
1	hq_isoforms.fasta.no5merge.collapsed.gff	exon	198675752	198679410	.	-	.	gene_id "RI:1:198675752:198676911-198677123:198679410:-"; transcript_id "RI:1:198675752:198676911-198677123:198679410:-:alternative1";
1	hq_isoforms.fasta.no5merge.collapsed.gff	exon	199230035	199230208	.	-	.	gene_id "RI:1:199230035:199230208-199230303:199230413:-"; transcript_id "RI:1:199230035:199230208-199230303:199230413:-:alternative2";
1	hq_isoforms.fasta.no5merge.collapsed.gff	exon	199230303	199230413	.	-	.	gene_id "RI:1:199230035:199230208-199230303:199230413:-"; transcript_id "RI:1:199230035:199230208-199230303:199230413:-:alternative2";
1	hq_isoforms.fasta.no5merge.collapsed.gff	exon	199230035	199230413	.	-	.	gene_id "RI:1:199230035:199230208-199230303:199230413:-"; transcript_id "RI:1:199230035:199230208-199230303:199230413:-:alternative1";
1	hq_isoforms.fasta.no5merge.collapsed.gff	exon	199273930	199274021	.	-	.	gene_id "RI:1:199273930:199274021-199274400:199277041:-"; transcript_id "RI:1:199273930:199274021-199274400:199277041:-:alternative2";
1	hq_isoforms.fasta.no5merge.collapsed.gff	exon	199274400	199277041	.	-	.	gene_id "RI:1:199273930:199274021-199274400:199277041:-"; transcript_id "RI:1:199273930:199274021-199274400:199277041:-:alternative2";
1	hq_isoforms.fasta.no5merge.collapsed.gff	exon	199273930	199277041	.	-	.	gene_id "RI:1:199273930:199274021-199274400:199277041:-"; transcript_id "RI:1:199273930:199274021-199274400:199277041:-:alternative1";
1	hq_isoforms.fasta.no5merge.collapsed.gff	exon	199335669	199335728	.	-	.	gene_id "RI:1:199335669:199335728-199335819:199335863:-"; transcript_id "RI:1:199335669:199335728-199335819:199335863:-:alternative2";
1	hq_isoforms.fasta.no5merge.collapsed.gff	exon	199335819	199335863	.	-	.	gene_id "RI:1:199335669:199335728-199335819:199335863:-"; transcript_id "RI:1:199335669:199335728-199335819:199335863:-:alternative2";
1	hq_isoforms.fasta.no5merge.collapsed.gff	exon	199335669	199335863	.	-	.	gene_id "RI:1:199335669:199335728-199335819:199335863:-"; transcript_id "RI:1:199335669:199335728-199335819:199335863:-:alternative1";
1	hq_isoforms.fasta.no5merge.collapsed.gff	exon	199364485	199365146	.	-	.	gene_id "RI:1:199364485:199365146-199366182:199366254:-"; transcript_id "RI:1:199364485:199365146-199366182:199366254:-:alternative2";
1	hq_isoforms.fasta.no5merge.collapsed.gff	exon	199366182	199366254	.	-	.	gene_id "RI:1:199364485:199365146-199366182:199366254:-"; transcript_id "RI:1:199364485:199365146-199366182:199366254:-:alternative2";
1	hq_isoforms.fasta.no5merge.collapsed.gff	exon	199364485	199366254	.	-	.	gene_id "RI:1:199364485:199365146-199366182:199366254:-"; transcript_id "RI:1:199364485:199365146-199366182:199366254:-:alternative1";
1	hq_isoforms.fasta.no5merge.collapsed.gff	exon	199368645	199368750	.	-	.	gene_id "RI:1:199368645:199368750-199369093:199369639:-"; transcript_id "RI:1:199368645:199368750-199369093:199369639:-:alternative2";
1	hq_isoforms.fasta.no5merge.collapsed.gff	exon	199369093	199369639	.	-	.	gene_id "RI:1:199368645:199368750-199369093:199369639:-"; transcript_id "RI:1:199368645:199368750-199369093:199369639:-:alternative2";
1	hq_isoforms.fasta.no5merge.collapsed.gff	exon	199368645	199369639	.	-	.	gene_id "RI:1:199368645:199368750-199369093:199369639:-"; transcript_id "RI:1:199368645:199368750-199369093:199369639:-:alternative1";
1	hq_isoforms.fasta.no5merge.collapsed.gff	exon	199368645	199368784	.	-	.	gene_id "RI:1:199368645:199368784-199369093:199369639:-"; transcript_id "RI:1:199368645:199368784-199369093:199369639:-:alternative2";
1	hq_isoforms.fasta.no5merge.collapsed.gff	exon	199369093	199369639	.	-	.	gene_id "RI:1:199368645:199368784-199369093:199369639:-"; transcript_id "RI:1:199368645:199368784-199369093:199369639:-:alternative2";
1	hq_isoforms.fasta.no5merge.collapsed.gff	exon	199368645	199369639	.	-	.	gene_id "RI:1:199368645:199368784-199369093:199369639:-"; transcript_id "RI:1:199368645:199368784-199369093:199369639:-:alternative1";
1	hq_isoforms.fasta.no5merge.collapsed.gff	exon	199374771	199374849	.	-	.	gene_id "RI:1:199374771:199374849-199375453:199375558:-"; transcript_id "RI:1:199374771:199374849-199375453:199375558:-:alternative2";
1	hq_isoforms.fasta.no5merge.collapsed.gff	exon	199375453	199375558	.	-	.	gene_id "RI:1:199374771:199374849-199375453:199375558:-"; transcript_id "RI:1:199374771:199374849-199375453:199375558:-:alternative2";
1	hq_isoforms.fasta.no5merge.collapsed.gff	exon	199374771	199375558	.	-	.	gene_id "RI:1:199374771:199374849-199375453:199375558:-"; transcript_id "RI:1:199374771:199374849-199375453:199375558:-:alternative1";
1	hq_isoforms.fasta.no5merge.collapsed.gff	exon	199369093	199369232	.	-	.	gene_id "RI:1:199369093:199369232-199369519:199369639:-"; transcript_id "RI:1:199369093:199369232-199369519:199369639:-:alternative2";
1	hq_isoforms.fasta.no5merge.collapsed.gff	exon	199369519	199369639	.	-	.	gene_id "RI:1:199369093:199369232-199369519:199369639:-"; transcript_id "RI:1:199369093:199369232-199369519:199369639:-:alternative2";
1	hq_isoforms.fasta.no5merge.collapsed.gff	exon	199369093	199369639	.	-	.	gene_id "RI:1:199369093:199369232-199369519:199369639:-"; transcript_id "RI:1:199369093:199369232-199369519:199369639:-:alternative1";
1	hq_isoforms.fasta.no5merge.collapsed.gff	exon	202189162	202189211	.	-	.	gene_id "RI:1:202189162:202189211-202189302:202189457:-"; transcript_id "RI:1:202189162:202189211-202189302:202189457:-:alternative2";
1	hq_isoforms.fasta.no5merge.collapsed.gff	exon	202189302	202189457	.	-	.	gene_id "RI:1:202189162:202189211-202189302:202189457:-"; transcript_id "RI:1:202189162:202189211-202189302:202189457:-:alternative2";
1	hq_isoforms.fasta.no5merge.collapsed.gff	exon	202189162	202189457	.	-	.	gene_id "RI:1:202189162:202189211-202189302:202189457:-"; transcript_id "RI:1:202189162:202189211-202189302:202189457:-:alternative1";
1	hq_isoforms.fasta.no5merge.collapsed.gff	exon	201675581	201675701	.	-	.	gene_id "RI:1:201675581:201675701-201676131:201676195:-"; transcript_id "RI:1:201675581:201675701-201676131:201676195:-:alternative2";
1	hq_isoforms.fasta.no5merge.collapsed.gff	exon	201676131	201676195	.	-	.	gene_id "RI:1:201675581:201675701-201676131:201676195:-"; transcript_id "RI:1:201675581:201675701-201676131:201676195:-:alternative2";
1	hq_isoforms.fasta.no5merge.collapsed.gff	exon	201675581	201676195	.	-	.	gene_id "RI:1:201675581:201675701-201676131:201676195:-"; transcript_id "RI:1:201675581:201675701-201676131:201676195:-:alternative1";
1	hq_isoforms.fasta.no5merge.collapsed.gff	exon	202187811	202187978	.	-	.	gene_id "RI:1:202187811:202187978-202188080:202188166:-"; transcript_id "RI:1:202187811:202187978-202188080:202188166:-:alternative2";
1	hq_isoforms.fasta.no5merge.collapsed.gff	exon	202188080	202188166	.	-	.	gene_id "RI:1:202187811:202187978-202188080:202188166:-"; transcript_id "RI:1:202187811:202187978-202188080:202188166:-:alternative2";
1	hq_isoforms.fasta.no5merge.collapsed.gff	exon	202187811	202188166	.	-	.	gene_id "RI:1:202187811:202187978-202188080:202188166:-"; transcript_id "RI:1:202187811:202187978-202188080:202188166:-:alternative1";
1	hq_isoforms.fasta.no5merge.collapsed.gff	exon	202187266	202187435	.	-	.	gene_id "RI:1:202187266:202187435-202187657:202187736:-"; transcript_id "RI:1:202187266:202187435-202187657:202187736:-:alternative2";
1	hq_isoforms.fasta.no5merge.collapsed.gff	exon	202187657	202187736	.	-	.	gene_id "RI:1:202187266:202187435-202187657:202187736:-"; transcript_id "RI:1:202187266:202187435-202187657:202187736:-:alternative2";
1	hq_isoforms.fasta.no5merge.collapsed.gff	exon	202187266	202187736	.	-	.	gene_id "RI:1:202187266:202187435-202187657:202187736:-"; transcript_id "RI:1:202187266:202187435-202187657:202187736:-:alternative1";
1	hq_isoforms.fasta.no5merge.collapsed.gff	exon	202187811	202188166	.	-	.	gene_id "RI:1:202187811:202188166-202188235:202188393:-"; transcript_id "RI:1:202187811:202188166-202188235:202188393:-:alternative2";
1	hq_isoforms.fasta.no5merge.collapsed.gff	exon	202188235	202188393	.	-	.	gene_id "RI:1:202187811:202188166-202188235:202188393:-"; transcript_id "RI:1:202187811:202188166-202188235:202188393:-:alternative2";
1	hq_isoforms.fasta.no5merge.collapsed.gff	exon	202187811	202188393	.	-	.	gene_id "RI:1:202187811:202188166-202188235:202188393:-"; transcript_id "RI:1:202187811:202188166-202188235:202188393:-:alternative1";
1	hq_isoforms.fasta.no5merge.collapsed.gff	exon	202257455	202257680	.	-	.	gene_id "RI:1:202257455:202257680-202257961:202258142:-"; transcript_id "RI:1:202257455:202257680-202257961:202258142:-:alternative2";
1	hq_isoforms.fasta.no5merge.collapsed.gff	exon	202257961	202258142	.	-	.	gene_id "RI:1:202257455:202257680-202257961:202258142:-"; transcript_id "RI:1:202257455:202257680-202257961:202258142:-:alternative2";
1	hq_isoforms.fasta.no5merge.collapsed.gff	exon	202257455	202258142	.	-	.	gene_id "RI:1:202257455:202257680-202257961:202258142:-"; transcript_id "RI:1:202257455:202257680-202257961:202258142:-:alternative1";
1	hq_isoforms.fasta.no5merge.collapsed.gff	exon	202257455	202257574	.	-	.	gene_id "RI:1:202257455:202257574-202257961:202258142:-"; transcript_id "RI:1:202257455:202257574-202257961:202258142:-:alternative2";
1	hq_isoforms.fasta.no5merge.collapsed.gff	exon	202257961	202258142	.	-	.	gene_id "RI:1:202257455:202257574-202257961:202258142:-"; transcript_id "RI:1:202257455:202257574-202257961:202258142:-:alternative2";
1	hq_isoforms.fasta.no5merge.collapsed.gff	exon	202257455	202258142	.	-	.	gene_id "RI:1:202257455:202257574-202257961:202258142:-"; transcript_id "RI:1:202257455:202257574-202257961:202258142:-:alternative1";
1	hq_isoforms.fasta.no5merge.collapsed.gff	exon	202260699	202260833	.	-	.	gene_id "RI:1:202260699:202260833-202261320:202261458:-"; transcript_id "RI:1:202260699:202260833-202261320:202261458:-:alternative2";
1	hq_isoforms.fasta.no5merge.collapsed.gff	exon	202261320	202261458	.	-	.	gene_id "RI:1:202260699:202260833-202261320:202261458:-"; transcript_id "RI:1:202260699:202260833-202261320:202261458:-:alternative2";
1	hq_isoforms.fasta.no5merge.collapsed.gff	exon	202260699	202261458	.	-	.	gene_id "RI:1:202260699:202260833-202261320:202261458:-"; transcript_id "RI:1:202260699:202260833-202261320:202261458:-:alternative1";
1	hq_isoforms.fasta.no5merge.collapsed.gff	exon	911582	911644	.	+	.	gene_id "RI:1:911582:911644-912101:912197:+"; transcript_id "RI:1:911582:911644-912101:912197:+:alternative2";
1	hq_isoforms.fasta.no5merge.collapsed.gff	exon	912101	912197	.	+	.	gene_id "RI:1:911582:911644-912101:912197:+"; transcript_id "RI:1:911582:911644-912101:912197:+:alternative2";
1	hq_isoforms.fasta.no5merge.collapsed.gff	exon	911582	912197	.	+	.	gene_id "RI:1:911582:911644-912101:912197:+"; transcript_id "RI:1:911582:911644-912101:912197:+:alternative1";
1	hq_isoforms.fasta.no5merge.collapsed.gff	exon	1095875	1095936	.	+	.	gene_id "RI:1:1095875:1095936-1097023:1097092:+"; transcript_id "RI:1:1095875:1095936-1097023:1097092:+:alternative2";
1	hq_isoforms.fasta.no5merge.collapsed.gff	exon	1097023	1097092	.	+	.	gene_id "RI:1:1095875:1095936-1097023:1097092:+"; transcript_id "RI:1:1095875:1095936-1097023:1097092:+:alternative2";
1	hq_isoforms.fasta.no5merge.collapsed.gff	exon	1095875	1097092	.	+	.	gene_id "RI:1:1095875:1095936-1097023:1097092:+"; transcript_id "RI:1:1095875:1095936-1097023:1097092:+:alternative1";
1	hq_isoforms.fasta.no5merge.collapsed.gff	exon	3041659	3041756	.	+	.	gene_id "RI:1:3041659:3041756-3042714:3042770:+"; transcript_id "RI:1:3041659:3041756-3042714:3042770:+:alternative2";
1	hq_isoforms.fasta.no5merge.collapsed.gff	exon	3042714	3042770	.	+	.	gene_id "RI:1:3041659:3041756-3042714:3042770:+"; transcript_id "RI:1:3041659:3041756-3042714:3042770:+:alternative2";
1	hq_isoforms.fasta.no5merge.collapsed.gff	exon	3041659	3042770	.	+	.	gene_id "RI:1:3041659:3041756-3042714:3042770:+"; transcript_id "RI:1:3041659:3041756-3042714:3042770:+:alternative1";
1	hq_isoforms.fasta.no5merge.collapsed.gff	exon	3090614	3090760	.	+	.	gene_id "RI:1:3090614:3090760-3091131:3091235:+"; transcript_id "RI:1:3090614:3090760-3091131:3091235:+:alternative2";
1	hq_isoforms.fasta.no5merge.collapsed.gff	exon	3091131	3091235	.	+	.	gene_id "RI:1:3090614:3090760-3091131:3091235:+"; transcript_id "RI:1:3090614:3090760-3091131:3091235:+:alternative2";
1	hq_isoforms.fasta.no5merge.collapsed.gff	exon	3090614	3091235	.	+	.	gene_id "RI:1:3090614:3090760-3091131:3091235:+"; transcript_id "RI:1:3090614:3090760-3091131:3091235:+:alternative1";
1	hq_isoforms.fasta.no5merge.collapsed.gff	exon	3090614	3090761	.	+	.	gene_id "RI:1:3090614:3090761-3091130:3091235:+"; transcript_id "RI:1:3090614:3090761-3091130:3091235:+:alternative2";
1	hq_isoforms.fasta.no5merge.collapsed.gff	exon	3091130	3091235	.	+	.	gene_id "RI:1:3090614:3090761-3091130:3091235:+"; transcript_id "RI:1:3090614:3090761-3091130:3091235:+:alternative2";
1	hq_isoforms.fasta.no5merge.collapsed.gff	exon	3090614	3091235	.	+	.	gene_id "RI:1:3090614:3090761-3091130:3091235:+"; transcript_id "RI:1:3090614:3090761-3091130:3091235:+:alternative1";
1	hq_isoforms.fasta.no5merge.collapsed.gff	exon	3709918	3710073	.	+	.	gene_id "RI:1:3709918:3710073-3711128:3711224:+"; transcript_id "RI:1:3709918:3710073-3711128:3711224:+:alternative2";
1	hq_isoforms.fasta.no5merge.collapsed.gff	exon	3711128	3711224	.	+	.	gene_id "RI:1:3709918:3710073-3711128:3711224:+"; transcript_id "RI:1:3709918:3710073-3711128:3711224:+:alternative2";
1	hq_isoforms.fasta.no5merge.collapsed.gff	exon	3709918	3711224	.	+	.	gene_id "RI:1:3709918:3710073-3711128:3711224:+"; transcript_id "RI:1:3709918:3710073-3711128:3711224:+:alternative1";
1	hq_isoforms.fasta.no5merge.collapsed.gff	exon	3709247	3709311	.	+	.	gene_id "RI:1:3709247:3709311-3709918:3710073:+"; transcript_id "RI:1:3709247:3709311-3709918:3710073:+:alternative2";
1	hq_isoforms.fasta.no5merge.collapsed.gff	exon	3709918	3710073	.	+	.	gene_id "RI:1:3709247:3709311-3709918:3710073:+"; transcript_id "RI:1:3709247:3709311-3709918:3710073:+:alternative2";
1	hq_isoforms.fasta.no5merge.collapsed.gff	exon	3709247	3710073	.	+	.	gene_id "RI:1:3709247:3709311-3709918:3710073:+"; transcript_id "RI:1:3709247:3709311-3709918:3710073:+:alternative1";
1	hq_isoforms.fasta.no5merge.collapsed.gff	exon	5793195	5793304	.	+	.	gene_id "RI:1:5793195:5793304-5793913:5794066:+"; transcript_id "RI:1:5793195:5793304-5793913:5794066:+:alternative2";
1	hq_isoforms.fasta.no5merge.collapsed.gff	exon	5793913	5794066	.	+	.	gene_id "RI:1:5793195:5793304-5793913:5794066:+"; transcript_id "RI:1:5793195:5793304-5793913:5794066:+:alternative2";
1	hq_isoforms.fasta.no5merge.collapsed.gff	exon	5793195	5794066	.	+	.	gene_id "RI:1:5793195:5793304-5793913:5794066:+"; transcript_id "RI:1:5793195:5793304-5793913:5794066:+:alternative1";
1	hq_isoforms.fasta.no5merge.collapsed.gff	exon	5796207	5796404	.	+	.	gene_id "RI:1:5796207:5796404-5796973:5797049:+"; transcript_id "RI:1:5796207:5796404-5796973:5797049:+:alternative2";
1	hq_isoforms.fasta.no5merge.collapsed.gff	exon	5796973	5797049	.	+	.	gene_id "RI:1:5796207:5796404-5796973:5797049:+"; transcript_id "RI:1:5796207:5796404-5796973:5797049:+:alternative2";
1	hq_isoforms.fasta.no5merge.collapsed.gff	exon	5796207	5797049	.	+	.	gene_id "RI:1:5796207:5796404-5796973:5797049:+"; transcript_id "RI:1:5796207:5796404-5796973:5797049:+:alternative1";
1	hq_isoforms.fasta.no5merge.collapsed.gff	exon	6892628	6892718	.	+	.	gene_id "RI:1:6892628:6892718-6892891:6893809:+"; transcript_id "RI:1:6892628:6892718-6892891:6893809:+:alternative2";
1	hq_isoforms.fasta.no5merge.collapsed.gff	exon	6892891	6893809	.	+	.	gene_id "RI:1:6892628:6892718-6892891:6893809:+"; transcript_id "RI:1:6892628:6892718-6892891:6893809:+:alternative2";
1	hq_isoforms.fasta.no5merge.collapsed.gff	exon	6892628	6893809	.	+	.	gene_id "RI:1:6892628:6892718-6892891:6893809:+"; transcript_id "RI:1:6892628:6892718-6892891:6893809:+:alternative1";
1	hq_isoforms.fasta.no5merge.collapsed.gff	exon	6892628	6892718	.	+	.	gene_id "RI:1:6892628:6892718-6893705:6893809:+"; transcript_id "RI:1:6892628:6892718-6893705:6893809:+:alternative2";
1	hq_isoforms.fasta.no5merge.collapsed.gff	exon	6893705	6893809	.	+	.	gene_id "RI:1:6892628:6892718-6893705:6893809:+"; transcript_id "RI:1:6892628:6892718-6893705:6893809:+:alternative2";
1	hq_isoforms.fasta.no5merge.collapsed.gff	exon	6892628	6893809	.	+	.	gene_id "RI:1:6892628:6892718-6893705:6893809:+"; transcript_id "RI:1:6892628:6892718-6893705:6893809:+:alternative1";
1	hq_isoforms.fasta.no5merge.collapsed.gff	exon	6892628	6892718	.	+	.	gene_id "RI:1:6892628:6892718-6892964:6893809:+"; transcript_id "RI:1:6892628:6892718-6892964:6893809:+:alternative2";
1	hq_isoforms.fasta.no5merge.collapsed.gff	exon	6892964	6893809	.	+	.	gene_id "RI:1:6892628:6892718-6892964:6893809:+"; transcript_id "RI:1:6892628:6892718-6892964:6893809:+:alternative2";
1	hq_isoforms.fasta.no5merge.collapsed.gff	exon	6892628	6893809	.	+	.	gene_id "RI:1:6892628:6892718-6892964:6893809:+"; transcript_id "RI:1:6892628:6892718-6892964:6893809:+:alternative1";
1	hq_isoforms.fasta.no5merge.collapsed.gff	exon	7106999	7107100	.	+	.	gene_id "RI:1:7106999:7107100-7108499:7108625:+"; transcript_id "RI:1:7106999:7107100-7108499:7108625:+:alternative2";
1	hq_isoforms.fasta.no5merge.collapsed.gff	exon	7108499	7108625	.	+	.	gene_id "RI:1:7106999:7107100-7108499:7108625:+"; transcript_id "RI:1:7106999:7107100-7108499:7108625:+:alternative2";
1	hq_isoforms.fasta.no5merge.collapsed.gff	exon	7106999	7108625	.	+	.	gene_id "RI:1:7106999:7107100-7108499:7108625:+"; transcript_id "RI:1:7106999:7107100-7108499:7108625:+:alternative1";
1	hq_isoforms.fasta.no5merge.collapsed.gff	exon	9825147	9825202	.	+	.	gene_id "RI:1:9825147:9825202-9825347:9825476:+"; transcript_id "RI:1:9825147:9825202-9825347:9825476:+:alternative2";
1	hq_isoforms.fasta.no5merge.collapsed.gff	exon	9825347	9825476	.	+	.	gene_id "RI:1:9825147:9825202-9825347:9825476:+"; transcript_id "RI:1:9825147:9825202-9825347:9825476:+:alternative2";
1	hq_isoforms.fasta.no5merge.collapsed.gff	exon	9825147	9825476	.	+	.	gene_id "RI:1:9825147:9825202-9825347:9825476:+"; transcript_id "RI:1:9825147:9825202-9825347:9825476:+:alternative1";
1	hq_isoforms.fasta.no5merge.collapsed.gff	exon	10468433	10468521	.	+	.	gene_id "RI:1:10468433:10468521-10470699:10470740:+"; transcript_id "RI:1:10468433:10468521-10470699:10470740:+:alternative2";
1	hq_isoforms.fasta.no5merge.collapsed.gff	exon	10470699	10470740	.	+	.	gene_id "RI:1:10468433:10468521-10470699:10470740:+"; transcript_id "RI:1:10468433:10468521-10470699:10470740:+:alternative2";
1	hq_isoforms.fasta.no5merge.collapsed.gff	exon	10468433	10470740	.	+	.	gene_id "RI:1:10468433:10468521-10470699:10470740:+"; transcript_id "RI:1:10468433:10468521-10470699:10470740:+:alternative1";
1	hq_isoforms.fasta.no5merge.collapsed.gff	exon	10702526	10702679	.	+	.	gene_id "RI:1:10702526:10702679-10703975:10704104:+"; transcript_id "RI:1:10702526:10702679-10703975:10704104:+:alternative2";
1	hq_isoforms.fasta.no5merge.collapsed.gff	exon	10703975	10704104	.	+	.	gene_id "RI:1:10702526:10702679-10703975:10704104:+"; transcript_id "RI:1:10702526:10702679-10703975:10704104:+:alternative2";
1	hq_isoforms.fasta.no5merge.collapsed.gff	exon	10702526	10704104	.	+	.	gene_id "RI:1:10702526:10702679-10703975:10704104:+"; transcript_id "RI:1:10702526:10702679-10703975:10704104:+:alternative1";
1	hq_isoforms.fasta.no5merge.collapsed.gff	exon	11961495	11961514	.	+	.	gene_id "RI:1:11961495:11961514-11963156:11964869:+"; transcript_id "RI:1:11961495:11961514-11963156:11964869:+:alternative2";
[truncated: 24,953 more rows]
